# Supplementary material for: Ni-Catalyzed direct iminoalkynylation of unactivated olefins with terminal alkynes: facile access to alkyne-labelled pyrrolines
Source: Royal Society of Chemistry journal article supplement (doi:10.1039/d1qo01217g), 2021-01-01

**Supplementary Information for**  
**Ni-catalyzed direct iminoalkynylation of unactivated olefins with terminal alkynes:**  
**facile access to alkyne-labelled pyrrolines**

Xingjie Zhang,\* Di Qi, Chenchen Jiao, Zhiguo Zhang, Xiaopan Liu, and Guisheng Zhang\*

*Key Laboratory of Green Chemical Media and Reactions, Ministry of Education,  
Collaborative Innovation Center of Henan Province for Green Manufacturing of Fine  
Chemicals, Henan Key Laboratory of Organic Functional Molecules and Drug Innovation,  
NMPA Key Laboratory for Research and Evaluation of Innovative Drug, School of  
Chemistry and Chemical Engineering, Henan Normal University  
46 East of Construction Road, Xinxiang, Henan 453007 (China)  
E-mail: zhangxingjie@htu.edu.cn; zgs@htu.cn*

## Contents

|                                                                                 |          |
|---------------------------------------------------------------------------------|----------|
| General information                                                             | S3       |
| Optimization studies                                                            | S4-S7    |
| General procedure for the synthesis of oxime esters <b>1a-1z</b>                | S7-S26   |
| Synthesis of terminal alkynes                                                   | S26      |
| General procedure for nickel-catalyzed iminoalkynylation of unactivated alkenes | S26-S59  |
| Late-stage modification of natural products and medicinally relevant molecules  | S59-S66  |
| Gram scale study                                                                | S66-S67  |
| Synthetic transformations of <b>3a</b>                                          | S67-S72  |
| Mechanistic studies                                                             | S72      |
| Radical trap experiment                                                         | S72-S73  |
| Radical clock experiment                                                        | S73-S74  |
| References                                                                      | S74-S75  |
| X-ray crystal structure of complex <b>3ac</b>                                   | S75      |
| NMR spectra of all new compounds                                                | S76-S257 |

## General information

Unless otherwise noted, commercially available reagents were used as received without further purification and all reactions were carried out using standard Schlenk technique or a dry box technique under a nitrogen atmosphere. Tetrahydrofuran (THF), dimethyl sulfoxide (DMSO) and acetonitrile (CH<sub>3</sub>CN) were dried using Eminex Solvent Purifier (EX-SPS5-800). Anhydrous *N,N*-dimethylformamide (DMF), *N,N*-dimethylacetamide (DMA) and 1-methyl-2-pyrrolidinone (NMP) were purchased from J&K Chemical Company. Ni(cod)<sub>2</sub>, NiCl<sub>2</sub>(glyme) and NiBr<sub>2</sub>(glyme) were purchased from Strem. Ni(OAc)<sub>2</sub>·4H<sub>2</sub>O was purchased from J&K Chemical Company. NiI<sub>2</sub> was purchased from Alfa Aesar. NiBr<sub>2</sub>(diglyme) was purchased from Sigma-Aldrich. Anhydrous K<sub>3</sub>PO<sub>4</sub> was purchased from Acros. Flash column chromatography was performed on silica gel (200-300 mesh). <sup>1</sup>H and <sup>13</sup>C NMR spectra were recorded on Bruker 400 MHz and 600 MHz spectrometers at room temperature in CDCl<sub>3</sub> (containing 0.03% TMS) solution. <sup>1</sup>H NMR spectra was recorded with tetramethylsilane (0.00 ppm) or solvent residual peak (CDCl<sub>3</sub>: 7.26 ppm) as internal reference; <sup>13</sup>C NMR spectra was recorded with CDCl<sub>3</sub> (77.00 ppm) as internal reference. Data are represented as follows: chemical shift, multiplicity (br = broad, s = singlet, d = doublet, t = triplet, q = quartet, dd = doublet of doublets, m = multiplet), coupling constants (Hz) and integration. High-resolution mass spectra were obtained by using Bruker UHR-ES-TOF MS or Thermo Scientific Q Exactive HF Orbitrap-FTMS. The IR spectra were measured on a PerkinElmer Spectrum 400 FT-IR/FT-FIR spectrometer. Single crystal X-ray diffraction data was collected at 295 K for complex **3ac** on a SuperNova diffractometer. The corresponding ketones used in this work were prepared according to literature procedures.<sup>1-5</sup>

## Optimization studies

**Table S1.** Effect of leaving group<sup>a</sup>

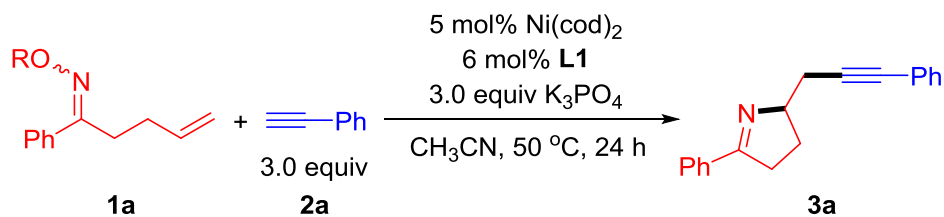

| Entry | R                                | Yield <sup>b</sup> (%) |
|-------|----------------------------------|------------------------|
| 1     | Ac                               | 33                     |
| 2     | Bz                               | 54                     |
| 3     | Bz <sup>p</sup> -OMe             | 44                     |
| 4     | Bz <sup>p</sup> -CF <sub>3</sub> | 58                     |
| 5     | Bz <sup>TFM</sup>                | 66                     |
| 6     | Bz <sup>F</sup>                  | 4                      |

<sup>a</sup> Conditions: oxime **1a** (0.3 mmol), **2a** (0.9 mmol, 91.9 mg), Ni(cod)<sub>2</sub> (0.015 mmol, 4.1 mg), **L1** (0.018 mmol, 7.2 mg), K<sub>3</sub>PO<sub>4</sub> (0.9 mmol, 191.0 mg), CH<sub>3</sub>CN (3.0 mL), 50 °C, 24 h, in a sealed tube, under N<sub>2</sub> atmosphere. <sup>b</sup> Isolated yields. Bz<sup>p</sup>-OMe = *p*-methoxybenzoyl, Bz<sup>p</sup>-CF<sub>3</sub> = *p*-(trifluoromethyl)benzoyl, Bz<sup>TFM</sup> = 3,5-bis(trifluoromethyl)benzoyl, Bz<sup>F</sup> = pentafluorobenzoyl.

**Table S2.** Effect of nickel source<sup>a</sup>

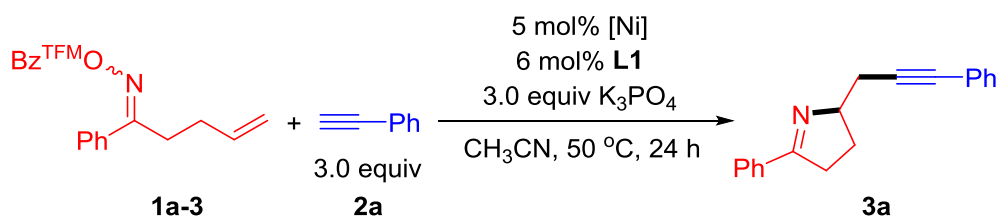

| Entry | [Ni]                                    | Yield <sup>b</sup> (%) |
|-------|-----------------------------------------|------------------------|
| 1     | Ni(cod) <sub>2</sub>                    | 66                     |
| 2     | NiCl <sub>2</sub> (glyme)               | 48                     |
| 3     | NiBr <sub>2</sub> (glyme)               | 60                     |
| 4     | Ni(OAc) <sub>2</sub> ·4H <sub>2</sub> O | 61                     |
| 5     | NiI <sub>2</sub>                        | 71                     |
| 6     | NiBr <sub>2</sub> (diglyme)             | 57                     |

<sup>a</sup> Conditions: oxime **1a-3** (0.3 mmol, 124.6 mg), **2a** (0.9 mmol, 91.9 mg), [Ni] (0.015 mmol), **L1** (0.018 mmol, 7.2 mg), K<sub>3</sub>PO<sub>4</sub> (0.9 mmol, 191.0 mg), CH<sub>3</sub>CN (3.0 mL), 50 °C, 24 h, in a sealed tube, under N<sub>2</sub> atmosphere. <sup>b</sup> Isolated yields. Bz<sup>TFM</sup> = 3,5-bis(trifluoromethyl)benzoyl.

**Table S3.** Effect of ligand<sup>a</sup>

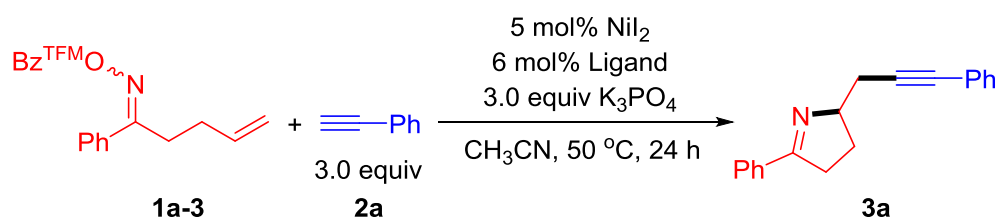

| Entry | Ligand    | Yield <sup>b</sup> (%) |
|-------|-----------|------------------------|
| 1     | <b>L1</b> | 71                     |
| 2     | <b>L2</b> | 58                     |
| 3     | <b>L3</b> | 46                     |
| 4     | <b>L4</b> | 13                     |
| 5     | <b>L5</b> | 23                     |
| 6     | <b>L6</b> | 24                     |
| 7     | <b>L7</b> | 58                     |
| 8     | <b>L8</b> | 59                     |
| 9     | <b>L9</b> | 2                      |

<sup>a</sup> Conditions: oxime **1a-3** (0.3 mmol, 124.6 mg), **2a** (0.9 mmol, 91.9 mg), NiI<sub>2</sub> (0.015 mmol, 4.7 mg), **L** (0.018 mmol), K<sub>3</sub>PO<sub>4</sub> (0.9 mmol, 191.0 mg), CH<sub>3</sub>CN (3.0 mL), 50 °C, 24 h, in a sealed tube, under N<sub>2</sub> atmosphere. <sup>b</sup> Isolated yields. Bz<sup>TFM</sup> = 3,5-bis(trifluoromethyl)benzoyl.

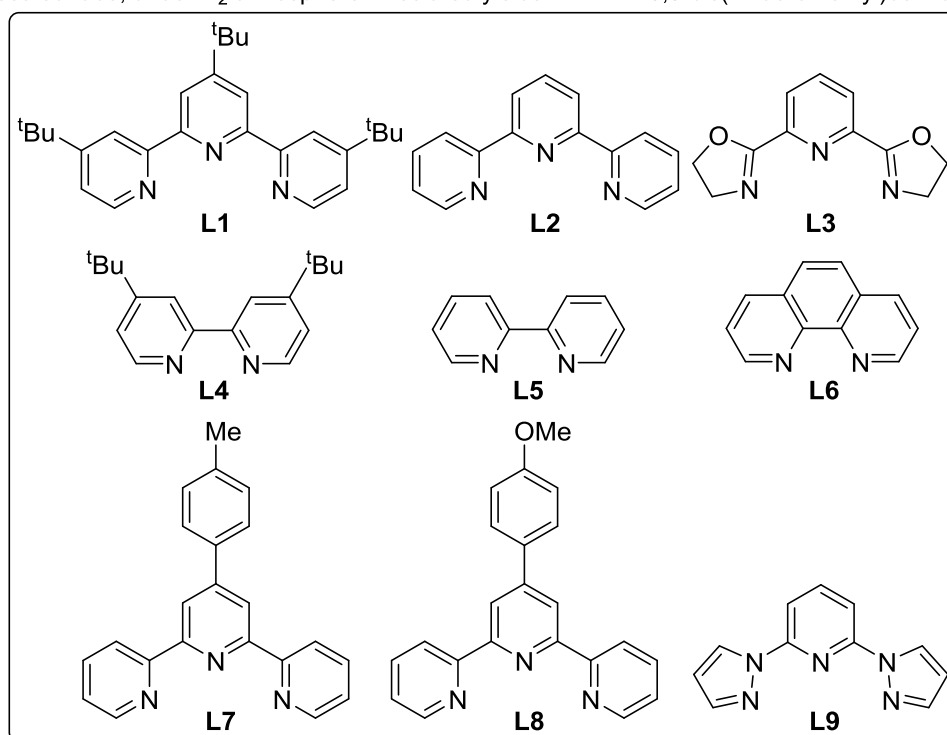

**Table S4.** Effect of solvent<sup>a</sup>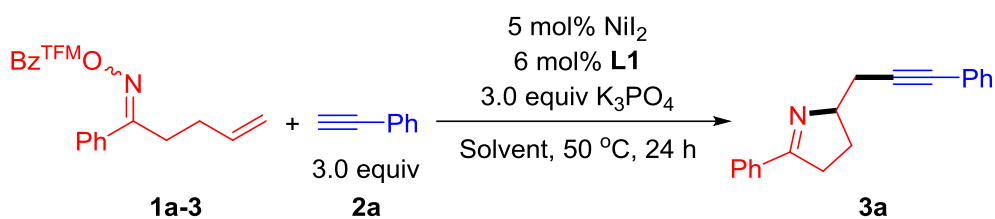

| Entry | Solvent            | Yield <sup>b</sup> (%) |
|-------|--------------------|------------------------|
| 1     | CH <sub>3</sub> CN | 71                     |
| 2     | THF                | 55                     |
| 3     | DMF                | 56                     |
| 4     | DMA                | 58                     |
| 5     | NMP                | 46                     |
| 6     | DMSO               | 61                     |

<sup>a</sup> Conditions: oxime **1a-3** (0.3 mmol, 124.6 mg), **2a** (0.9 mmol, 91.9 mg), NiI<sub>2</sub> (0.015 mmol, 4.7 mg), **L1** (0.018 mmol, 7.2 mg), K<sub>3</sub>PO<sub>4</sub> (0.9 mmol, 191.0 mg), solvent (3.0 mL), 50 °C, 24 h, in a sealed tube, under N<sub>2</sub> atmosphere. <sup>b</sup> Isolated yields. Bz<sup>TFM</sup> = 3,5-bis(trifluoromethyl)benzoyl.

**Table S5.** Effect of base<sup>a</sup>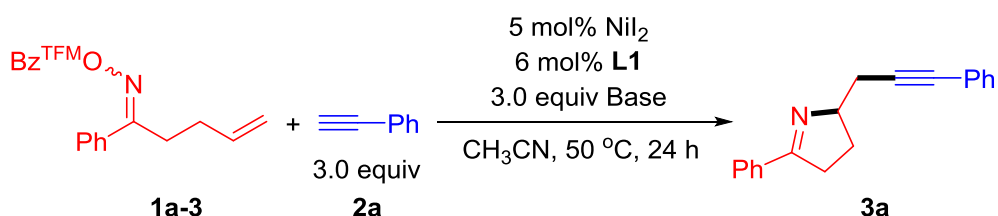

| Entry | Base                            | Yield <sup>b</sup> (%) |
|-------|---------------------------------|------------------------|
| 1     | K <sub>3</sub> PO <sub>4</sub>  | 71                     |
| 2     | Na <sub>3</sub> PO <sub>4</sub> | 20                     |
| 3     | K <sub>2</sub> CO <sub>3</sub>  | 2                      |
| 4     | DBU                             | 37                     |
| 5     | TMG                             | 46                     |
| 6     | Et <sub>3</sub> N               | 4                      |

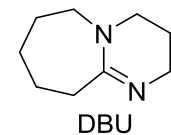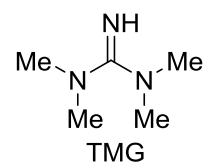

<sup>a</sup> Conditions: oxime **1a-3** (0.3 mmol, 124.6 mg), **2a** (0.9 mmol, 91.9 mg), NiI<sub>2</sub> (0.015 mmol, 4.7 mg), **L1** (0.018 mmol, 7.2 mg), base (0.9 mmol), CH<sub>3</sub>CN (3.0 mL), 50 °C, 24 h, in a sealed tube, under N<sub>2</sub> atmosphere. <sup>b</sup> Isolated yields. Bz<sup>TFM</sup> = 3,5-bis(trifluoromethyl)benzoyl.

**Table S6.** Control experiment and the effects of other parameters<sup>d</sup>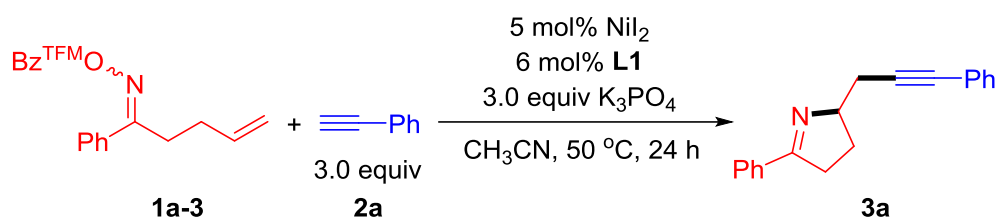

| Entry          | NiI <sub>2</sub> (mol%) | <b>L1</b> (mol%) | Yield <sup>b</sup> (%) |
|----------------|-------------------------|------------------|------------------------|
| 1              | -                       | 6                | 0                      |
| 2              | 5                       | -                | 2                      |
| 3 <sup>c</sup> | 5                       | 6                | 0                      |
| 4 <sup>d</sup> | 5                       | 6                | 62                     |
| 5 <sup>e</sup> | 5                       | 6                | 70                     |
| 6 <sup>f</sup> | 5                       | 6                | 39                     |

<sup>a</sup> Conditions: oxime **1a-3** (0.3 mmol, 124.6 mg), **2a** (0.9 mmol, 91.9 mg), NiI<sub>2</sub> (0.015 mmol, 4.7 mg), **L1** (0.018 mmol, 7.2 mg), K<sub>3</sub>PO<sub>4</sub> (0.9 mmol, 191.0 mg), CH<sub>3</sub>CN (3.0 mL), 50 °C, 24 h, in a sealed tube, under N<sub>2</sub> atmosphere. <sup>b</sup> Isolated yields. Bz<sup>TFM</sup> = 3,5-bis(trifluoromethyl)benzoyl. <sup>c</sup> No K<sub>3</sub>PO<sub>4</sub>. <sup>d</sup> 30 °C. <sup>e</sup> **2a** (2.0 equiv), K<sub>3</sub>PO<sub>4</sub> (2.0 equiv) were used. <sup>f</sup> **2a** (1.0 equiv), K<sub>3</sub>PO<sub>4</sub> (1.0 equiv) were used.

### General procedure for the synthesis of oxime esters **1a-1z**

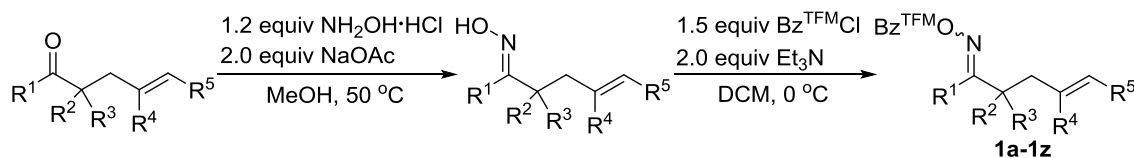

According to previous reported procedure, to a solution of the corresponding ketone (1.0 equiv) in methanol (1.0 M) was added sodium acetate (2.0 equiv) and hydroxylamine hydrochloride (1.2 equiv). The reaction mixture was stirred at 50 °C for 2 h and then cooled to room temperature. The excess methanol was removed under reduced pressure and the resulting mixture was extracted with ethyl acetate/water. The combined organic layers were washed with water and brine, and dried over anhydrous Na<sub>2</sub>SO<sub>4</sub>. The solvent was concentrated under vacuum and the residue was used directly in the next step without further purification.

To a solution of the appropriate oxime (1.0 equiv) in anhydrous dichloromethane (0.5 M) at 0 °C was added Et<sub>3</sub>N (2.0 equiv) and 3,5-bis(trifluoromethyl)benzoyl chloride (1.5 equiv) under nitrogen atmosphere. The reaction mixture was allowed to stir at the same temperature for hours until the oxime was consumed (determined by TLC). Then saturated

NaHCO<sub>3</sub> aqueous solution was added and the mixture was extracted with dichloromethane. The combined organic layers were washed with water and brine, and dried over anhydrous Na<sub>2</sub>SO<sub>4</sub>. The resulting solution was concentrated under vacuum and the residue was purified by column chromatography on silica gel to afford the corresponding oxime ester.

**Table S7.  $\gamma,\delta$ -unsaturated oxime esters used in this work.**

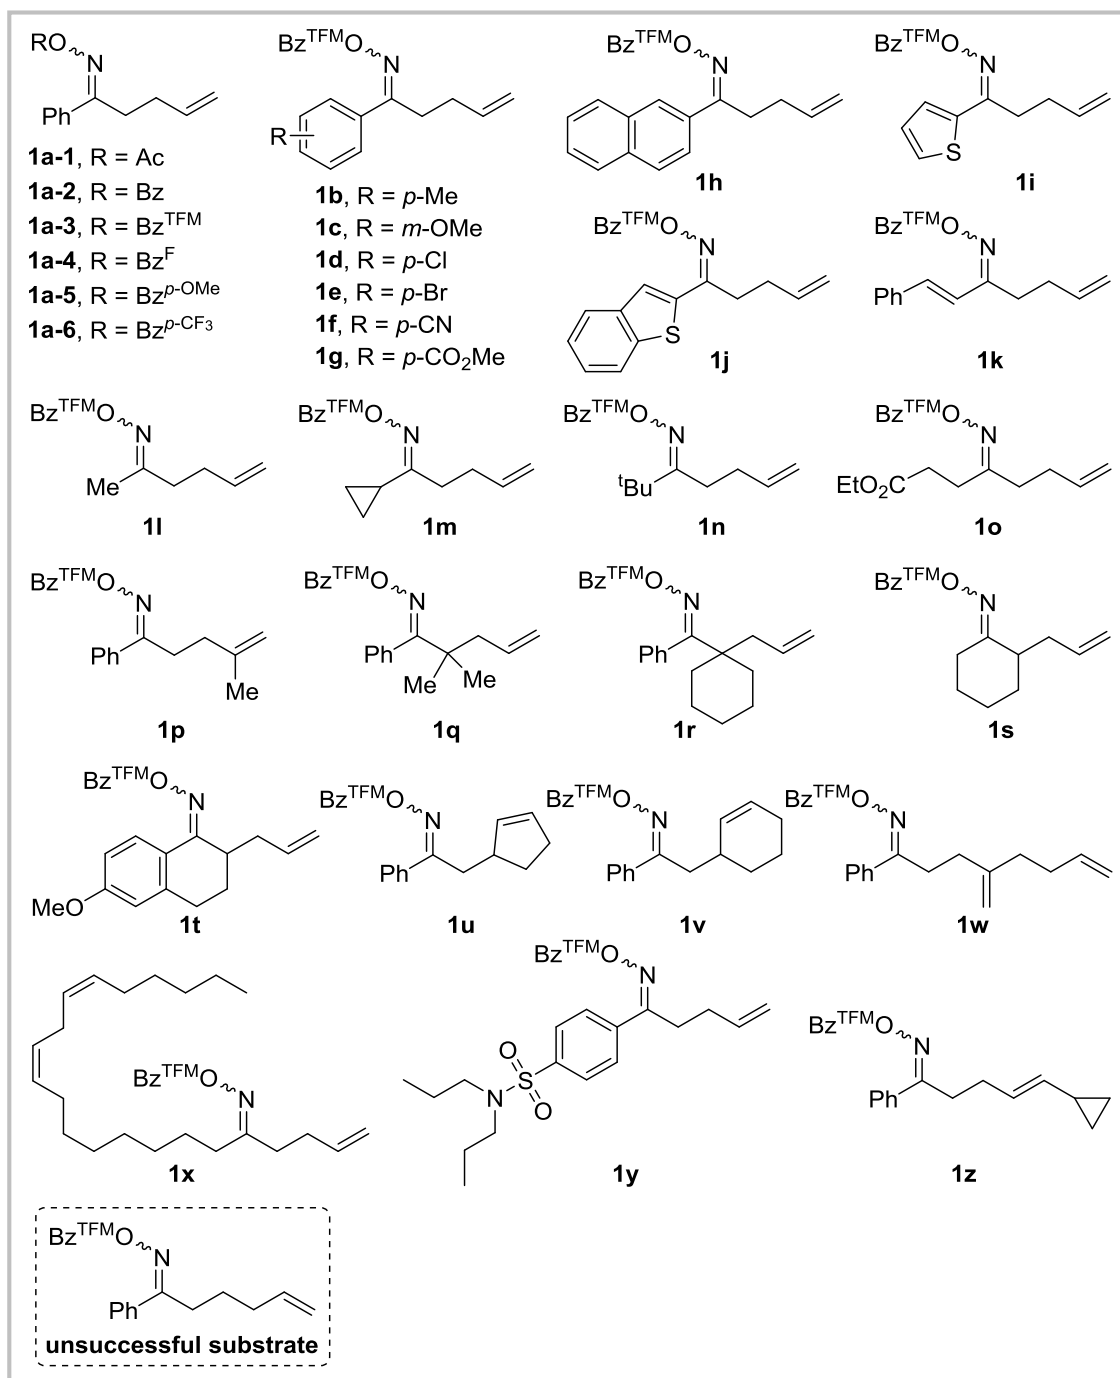



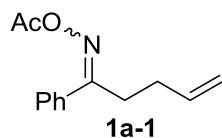

**1-Phenylpent-4-en-1-one *O*-acetyl oxime (1a-1).** 10.0 mmol scale, purification of the crude product by column chromatography on silica gel (eluent: petroleum ether: ethyl acetate = 30:1) afforded the title product in 86% overall yield (1.86 g) as a yellow oil. <sup>1</sup>H NMR (400 MHz, CDCl<sub>3</sub>): δ 2.26 (s, 3H), 2.29-2.34 (m, 2H), 2.94 (t, *J* = 7.6 Hz, 2H), 5.00-5.07 (m, 2H), 5.78-5.85 (m, 2H), 7.38-7.44 (m, 3H), 7.69-7.71 (m, 2H). <sup>13</sup>C NMR (100 MHz, CDCl<sub>3</sub>): δ 19.82, 27.60, 30.59, 115.77, 127.24, 128.61, 130.50, 133.86, 136.46, 165.60, 168.97. The spectroscopic data are in agreement with that previously reported.<sup>6</sup>

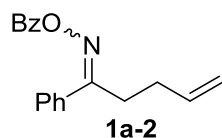

**1-Phenylpent-4-en-1-one *O*-benzoyl oxime (1a-2).** 5.0 mmol scale, purification of the crude product by column chromatography on silica gel (eluent: petroleum ether: ethyl acetate = 30:1) afforded the title product in 69% overall yield (0.96 g) as a white solid. <sup>1</sup>H NMR (400 MHz, CDCl<sub>3</sub>): δ 2.40-2.46 (m, 2H), 3.08 (t, *J* = 7.6 Hz, 2H), 5.03-5.12 (m, 2H), 5.83-5.93 (m, 1H), 7.42-7.47 (m, 3H), 7.50 (t, *J* = 7.6 Hz, 2H), 7.62 (t, *J* = 7.2 Hz, 1H), 7.79 (d, *J* = 7.6 Hz, 2H), 8.12 (d, *J* = 8.0 Hz, 2H). <sup>13</sup>C NMR (151 MHz, CDCl<sub>3</sub>): δ 27.88, 30.62, 115.81, 127.20, 128.44, 128.49, 128.95, 129.39, 130.46, 133.17, 133.67, 136.27, 163.50, 166.51. The spectroscopic data are in agreement with that previously reported.<sup>7</sup>

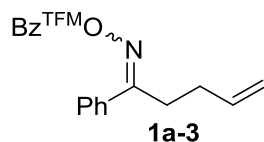

**1-Phenylpent-4-en-1-one *O*-(3,5-bis(trifluoromethyl)benzoyl) oxime (1a-3).** 5.0 mmol scale, purification of the crude product by column chromatography on silica gel (eluent: petroleum ether: ethyl acetate = 25:1) afforded the title product in 73% overall yield (1.52 g) as a white solid. <sup>1</sup>H NMR (600 MHz, CDCl<sub>3</sub>): δ 2.42-2.45 (m, 2H), 3.08 (t, *J* = 7.8, 2H), 5.07-5.14 (m, 2H), 5.84-5.91 (m, 1H), 7.47 (t, *J* = 7.2, 2H), 7.51 (t, *J* = 7.2, 1H), 7.80 (d, *J*

= 7.2, 2H), 8.13 (s, 1H), 8.56 (s, 2H).  $^{13}\text{C}$  NMR (151 MHz,  $\text{CDCl}_3$ ):  $\delta$  28.34, 30.84, 116.19, 122.75 (q,  $J = 273.0$  Hz), 126.62 (q,  $J = 3.3$  Hz), 127.38, 128.76, 129.60 (q,  $J = 2.1$  Hz), 131.01, 131.46, 132.41 (q,  $J = 34.1$  Hz), 133.16, 136.01, 161.04, 167.85. IR (neat): 3090, 3062, 2985, 2924, 2859, 1759, 1644, 1618, 1569, 1466, 1445, 1380, 1346, 1326, 1276, 1222, 1167, 1110, 1093, 1052, 994, 946, 911, 896, 843, 773, 752, 700, 689, 681, 664, 626, 609, 575, 526, 500, 468, 440  $\text{cm}^{-1}$ . HRMS (ESI) calcd. for  $\text{C}_{20}\text{H}_{15}\text{F}_6\text{NNaO}_2$   $[\text{M}+\text{Na}]^+$ : 438.0899, found 438.0899.

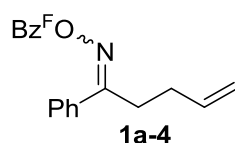

**1-Phenylpent-4-en-1-one O-perfluorobenzoyl oxime (1a-4).** 5.0 mmol scale, purification of the crude product by column chromatography on silica gel (eluent: petroleum ether: ethyl acetate = 20:1) afforded the title product in 76% overall yield (1.40 g) as a purple solid.  $^1\text{H}$  NMR (600 MHz,  $\text{CDCl}_3$ ):  $\delta$  2.32-2.36 (m, 2H), 3.00 (t,  $J = 7.8$  Hz, 2H), 5.01-5.06 (m, 2H), 5.77-5.83 (m, 1H), 7.43-7.46 (m, 2H), 7.48-7.50 (m, 1H), 7.74-7.75 (m, 2H).  $^{13}\text{C}$  NMR (151 MHz,  $\text{CDCl}_3$ ): major signals:  $\delta$  28.20, 30.65, 116.11, 127.45, 128.80, 131.09, 133.02, 136.05, 156.52, 168.16. The spectroscopic data are in agreement with that previously reported.<sup>8</sup>

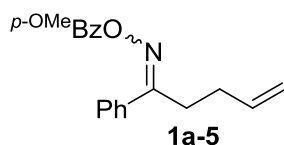

**1-Phenylpent-4-en-1-one O-(4-methoxybenzoyl) oxime (1a-5).** 5.0 mmol scale, purification of the crude product by column chromatography on silica gel (eluent: petroleum ether: ethyl acetate = 20:1) afforded the title product in 70% overall yield (1.08 g) as a purple solid.  $^1\text{H}$  NMR (600 MHz,  $\text{CDCl}_3$ ):  $\delta$  2.41-2.44 (m, 2H), 3.06 (t,  $J = 7.8$  Hz, 2H), 3.89 (s, 3H), 5.04-5.12 (m, 2H), 5.85-5.90 (m, 1H), 6.98 (d,  $J = 9.0$  Hz, 2H), 7.42-7.48 (m, 3H), 7.79 (d,  $J = 7.2$  Hz, 2H), 8.08 (d,  $J = 8.4$  Hz, 2H).  $^{13}\text{C}$  NMR (100 MHz,  $\text{CDCl}_3$ ):  $\delta$  27.94, 30.70, 55.35, 113.81, 115.81, 121.19, 127.26, 128.53, 130.43, 131.55,

133.90, 136.45, 163.36, 163.57, 166.17. IR (neat): 3078, 3060, 2980, 2939, 2833, 1732, 1693, 1643, 1602, 1578, 1509, 1454, 1445, 1421, 1332, 1313, 1300, 1251, 1166, 1113, 1072, 1053, 1010, 910, 861, 844, 813, 756, 701, 690, 669, 636, 611, 549, 508, 488  $\text{cm}^{-1}$ . HRMS (ESI) calcd. for  $\text{C}_{19}\text{H}_{19}\text{NNaO}_3$   $[\text{M}+\text{Na}]^+$ : 332.1257, found 332.1257.

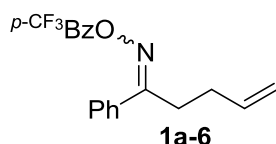

**1-Phenylpent-4-en-1-one O-(4-(trifluoromethyl)benzoyl) oxime (1a-6).** 5.0 mmol scale, purification of the crude product by column chromatography on silica gel (eluent: petroleum ether: ethyl acetate = 30:1) afforded the title product in 87% overall yield (1.52 g) as a white solid.  $^1\text{H}$  NMR (400 MHz,  $\text{CDCl}_3$ ):  $\delta$  2.40-2.45 (m, 2H), 3.08 (t,  $J = 8.0$  Hz, 2H), 5.04-5.12 (m, 2H), 5.82-5.92 (m, 1H), 7.43-7.51 (m, 3H), 7.77-7.80 (m, 4H), 8.23 (d,  $J = 8.0$  Hz, 2H).  $^{13}\text{C}$  NMR (151 MHz,  $\text{CDCl}_3$ ):  $\delta$  28.09, 30.75, 116.06, 123.49 (q,  $J = 273.2$  Hz), 125.62 (q,  $J = 4.4$  Hz), 127.37, 128.70, 129.94, 130.81, 132.43, 133.50, 134.71 (q,  $J = 33.1$  Hz), 136.25, 162.49, 167.31. The spectroscopic data are in agreement with that previously reported.<sup>9</sup>

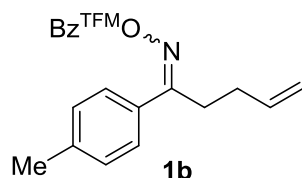

**1-(p-Tolyl)pent-4-en-1-one O-(3,5-bis(trifluoromethyl)benzoyl) oxime (1b).** 4.0 mmol scale, purification of the crude product by column chromatography on silica gel (eluent: petroleum ether: ethyl acetate = 30:1) afforded the title product in 88% overall yield (1.52 g) as a white solid.  $^1\text{H}$  NMR (400 MHz,  $\text{CDCl}_3$ ):  $\delta$  2.39-2.45 (m, 5H), 3.06 (t,  $J = 7.6$  Hz, 2H), 5.06-5.15 (m, 2H), 5.82-5.92 (m, 1H), 7.27 (d,  $J = 8.0$  Hz, 2H), 7.70 (d,  $J = 8.4$  Hz, 2H), 8.12 (s, 1H), 8.55 (s, 2H).  $^{13}\text{C}$  NMR (100 MHz,  $\text{CDCl}_3$ ):  $\delta$  21.36, 28.27, 30.97, 116.19, 122.78 (q,  $J = 271.6$  Hz), 126.64 (q,  $J = 3.6$  Hz), 127.34, 129.52, 129.63 (q,  $J = 2.9$  Hz), 130.22, 131.55, 132.45 (q,  $J = 33.9$  Hz), 136.12, 141.54, 161.16, 167.76. IR (neat): 3088, 3068, 3009, 2983, 2928, 1842, 1758, 1640, 1621, 1598, 1561, 1513, 1462, 1438, 1384,

1334, 1280, 1216, 1193, 1168, 1128, 1114, 1059, 1013, 1002, 913, 896, 845, 830, 819, 756, 715, 698, 681, 647, 630, 563, 504, 437, 421, 404  $\text{cm}^{-1}$ . HRMS (ESI) calcd. for  $\text{C}_{21}\text{H}_{17}\text{F}_6\text{NNaO}_2$   $[\text{M}+\text{Na}]^+$ : 452.1056, found 452.1059.

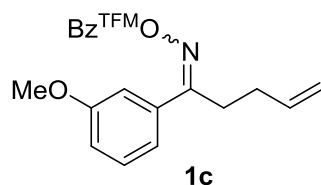

**1-(3-Methoxyphenyl)pent-4-en-1-one *O*-(3,5-bis(trifluoromethyl)benzoyl) oxime (1c).**

10.0 mmol scale, purification of the crude product by column chromatography on silica gel (eluent: petroleum ether: ethyl acetate = 30:1) afforded the title product in 65% overall yield (2.91 g) as a white solid.  $^1\text{H}$  NMR (400 MHz,  $\text{CDCl}_3$ ):  $\delta$  2.40-2.46 (m, 2H), 3.06 (t,  $J$  = 7.6 Hz, 2H), 3.87 (s, 3H), 5.06-5.16 (m, 2H), 5.82-5.92 (m, 1H), 7.05 (dt,  $J$  = 2.4, 7.2 Hz, 1H), 7.34-7.40 (m, 3H), 8.13 (s, 1H), 8.55 (s, 2H).  $^{13}\text{C}$  NMR (100 MHz,  $\text{CDCl}_3$ ):  $\delta$  28.59, 30.90, 55.39, 112.82, 116.30, 116.82, 119.86, 122.76 (q,  $J$  = 271.5 Hz), 126.68 (q,  $J$  = 3.6 Hz), 129.65 (q,  $J$  = 3.7 Hz), 129.84, 131.45, 132.48 (q,  $J$  = 34.0 Hz), 134.54, 136.04, 159.84, 161.10, 167.94. IR (neat): 3092, 2986, 2934, 2837, 1756, 1640, 1619, 1598, 1579, 1492, 1465, 1422, 1384, 1330, 1275, 1216, 1173, 1122, 1065, 1038, 994, 908, 869, 845, 790, 754, 693, 681, 556, 520, 467, 438  $\text{cm}^{-1}$ . HRMS (ESI) calcd. for  $\text{C}_{21}\text{H}_{17}\text{F}_6\text{NNaO}_3$   $[\text{M}+\text{Na}]^+$ : 468.1005, found 468.1005.

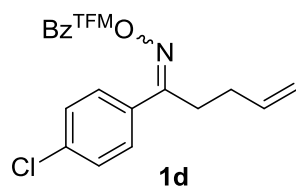

**1-(4-Chlorophenyl)pent-4-en-1-one *O*-(3,5-bis(trifluoromethyl)benzoyl) oxime (1d).**

5.0 mmol scale, purification of the crude product by column chromatography on silica gel (eluent: petroleum ether: ethyl acetate = 30:1) afforded the title product in 85% overall yield (1.91 g) as a white solid.  $^1\text{H}$  NMR (400 MHz,  $\text{CDCl}_3$ ):  $\delta$  2.40-2.45 (m, 2H), 3.07 (t,  $J$  = 7.6 Hz, 2H), 5.07-5.16 (m, 2H), 5.81-5.91 (m, 1H), 7.42-7.45 (m, 2H), 7.74-7.78 (m, 2H), 8.14 (s, 1H), 8.55 (s, 2H).  $^{13}\text{C}$  NMR (100 MHz,  $\text{CDCl}_3$ ):  $\delta$  28.20, 30.80, 116.49, 122.74 (q,

$J = 270.9$  Hz), 126.76 (q,  $J = 3.6$  Hz), 128.74, 129.11, 129.64 (q,  $J = 3.6$  Hz), 131.28, 131.61, 132.51 (q,  $J = 33.9$  Hz), 135.77, 137.38, 160.99, 166.79. IR (neat): 3094, 3064, 2991, 2922, 1748, 1644, 1620, 1610, 1591, 1495, 1461, 1398, 1382, 1341, 1324, 1272, 1222, 1169, 1114, 1040, 1009, 995, 923, 911, 885, 844, 832, 816, 758, 717, 698, 680, 612, 578, 548, 497, 476, 438, 417  $\text{cm}^{-1}$ . HRMS (ESI) calcd. for  $\text{C}_{20}\text{H}_{14}\text{ClF}_6\text{NNaO}_2$   $[\text{M}+\text{Na}]^+$ : 472.0509, found 472.0505.

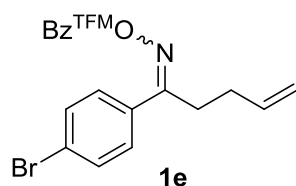

**1-(4-Bromophenyl)pent-4-en-1-one *O*-(3,5-bis(trifluoromethyl)benzoyl) oxime (1e).** 4.5 mmol scale, purification of the crude product by column chromatography on silica gel (eluent: petroleum ether: ethyl acetate = 50:1) afforded the title product in 48% overall yield (1.06 g) as a white solid.  $^1\text{H}$  NMR (400 MHz,  $\text{CDCl}_3$ ):  $\delta$  2.39-2.44 (m, 2H), 3.06 (t,  $J = 7.6$  Hz, 2H), 5.07-5.15 (m, 2H), 5.80-5.90 (m, 1H), 7.59-7.62 (m, 2H), 7.67-7.70 (m, 2H), 8.13 (s, 1H), 8.54 (s, 2H).  $^{13}\text{C}$  NMR (100 MHz,  $\text{CDCl}_3$ ):  $\delta$  28.12, 30.79, 116.48, 122.72 (q,  $J = 271.6$  Hz), 125.75, 126.78 (q,  $J = 3.6$  Hz), 128.91, 129.63 (q,  $J = 2.9$  Hz), 131.26, 132.06, 132.49 (q,  $J = 34.0$  Hz), 135.75, 160.96, 166.86 (*1 aromatic carbon signal is not observed due to signal overlap*). IR (neat): 3103, 3070, 2987, 2922, 1749, 1643, 1620, 1588, 1492, 1460, 1382, 1324, 1272, 1222, 1169, 1115, 1071, 1039, 1007, 994, 965, 924, 911, 885, 844, 831, 813, 757, 713, 698, 680, 610, 578, 541, 517, 495, 482, 456, 438  $\text{cm}^{-1}$ . HRMS (ESI) calcd. for  $\text{C}_{20}\text{H}_{15}\text{BrF}_6\text{NO}_2$   $[\text{M}+\text{H}]^+$ : 494.0185, found 494.0188.

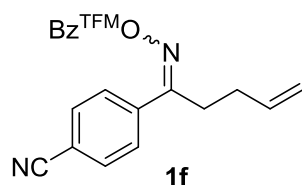

**4-(1-(((3,5-Bis(trifluoromethyl)benzoyl)oxy)imino)pent-4-en-1-yl)benzonitrile (1f).** 3.0 mmol scale, purification of the crude product by column chromatography on silica gel (eluent: petroleum ether: acetone = 10:1) afforded the title product in 49% overall yield

(0.65 g) as a white solid.  $^1\text{H}$  NMR (400 MHz,  $\text{CDCl}_3$ ):  $\delta$  2.40-2.46 (m, 2H), 3.10 (t,  $J = 7.2$  Hz, 2H), 5.08-5.15 (m, 2H), 5.79-5.89 (m, 1H), 7.76-7.78 (m, 2H), 7.92-7.94 (m, 2H), 8.15 (s, 1H), 8.54 (s, 2H).  $^{13}\text{C}$  NMR (100 MHz,  $\text{CDCl}_3$ ):  $\delta$  28.16, 30.62, 114.64, 116.81, 117.99, 122.67 (q,  $J = 270.9$  Hz), 126.98 (q,  $J = 3.6$  Hz), 128.07, 129.67 (q,  $J = 2.9$  Hz), 130.95, 132.54, 132.58 (q,  $J = 33.9$  Hz), 135.41, 137.57, 160.81, 166.28. IR (neat): 3054, 2981, 2938, 2227, 1750, 1620, 1468, 1382, 1275, 1224, 1173, 1124, 1093, 1040, 996, 927, 911, 892, 855, 846, 832, 825, 758, 698, 681, 661, 645, 616, 566, 549, 508, 441, 408  $\text{cm}^{-1}$ . HRMS (ESI) calcd. for  $\text{C}_{21}\text{H}_{14}\text{F}_6\text{N}_2\text{NaO}_2$   $[\text{M}+\text{Na}]^+$ : 463.0852, found 463.0850.

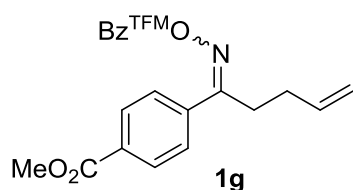

**Methyl 4-(1-(((3,5-bis(trifluoromethyl)benzoyl)oxy)imino)pent-4-en-1-yl)benzoate (1g).**

2.3 mmol scale, purification of the crude product by column chromatography on silica gel (eluent: petroleum ether: ethyl acetate = 20:1) afforded the title product in 69% overall yield (0.75 g) as a white solid.  $^1\text{H}$  NMR (400 MHz,  $\text{CDCl}_3$ ):  $\delta$  2.40-2.46 (m, 2H), 3.11 (t,  $J = 8.0$  Hz, 2H), 3.96 (s, 3H), 5.07-5.15 (m, 2H), 5.80-5.91 (m, 1H), 7.86-7.89 (m, 2H), 8.12-8.14 (m, 3H), 8.55 (s, 2H).  $^{13}\text{C}$  NMR (100 MHz,  $\text{CDCl}_3$ ):  $\delta$  28.31, 30.71, 52.26, 116.49, 122.70 (q,  $J = 270.8$  Hz), 126.81 (q,  $J = 3.6$  Hz), 127.42, 129.63 (q,  $J = 2.9$  Hz), 129.91, 131.18, 132.29, 132.48 (q,  $J = 34.0$  Hz), 135.69, 137.35, 160.90, 166.19, 167.07. IR (neat): 3090, 2985, 2955, 1763, 1717, 1644, 1617, 1465, 1436, 1405, 1382, 1312, 1279, 1220, 1137, 1112, 1095, 1047, 1020, 1002, 954, 922, 914, 896, 861, 848, 835, 773, 758, 699, 682, 655, 612, 495, 467, 438, 409  $\text{cm}^{-1}$ . HRMS (ESI) calcd. for  $\text{C}_{22}\text{H}_{17}\text{F}_6\text{NNaO}_4$   $[\text{M}+\text{Na}]^+$ : 496.0954, found 496.0953.

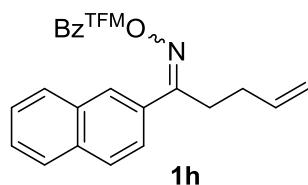

**1-(Naphthalen-2-yl)pent-4-en-1-one *O*-(3,5-bis(trifluoromethyl)benzoyl) oxime (1h).**

5.0 mmol scale, purification of the crude product by column chromatography on silica gel (eluent: petroleum ether: ethyl acetate = 30:1) afforded the title product in 82% overall yield (1.91 g) as a white solid. <sup>1</sup>H NMR (600 MHz, CDCl<sub>3</sub>): δ 2.48-2.52 (m, 2H), 3.20 (t, *J* = 7.8 Hz, 2H), 5.09-5.17 (m, 2H), 5.88-5.95 (m, 1H), 7.54-7.59 (m, 2H), 7.89 (d, *J* = 7.2 Hz, 1H), 7.91-7.95 (m, 2H), 7.99 (d, *J* = 8.4 Hz, 1H), 8.14 (s, 1H), 8.23 (s, 1H), 8.58 (s, 2H). <sup>13</sup>C NMR (100 MHz, CDCl<sub>3</sub>): δ 28.24, 31.09, 116.36, 122.79 (q, *J* = 271.6 Hz), 123.93, 126.74, 126.79 (q, *J* = 4.4 Hz), 127.63, 127.74, 127.99, 128.69, 128.82, 129.68 (q, *J* = 2.9 Hz), 130.46, 131.45, 132.50 (q, *J* = 33.9 Hz), 132.90, 134.53, 136.08, 161.17, 167.70. IR (neat): 3088, 3066, 3003, 2983, 2922, 1754, 1639, 1620, 1603, 1577, 1462, 1436, 1381, 1328, 1280, 1270, 1241, 1217, 1184, 1165, 1125, 1113, 1052, 1010, 996, 951, 907, 867, 843, 824, 756, 702, 693, 681, 668, 614, 556, 507, 476, 442, 429, 416 cm<sup>-1</sup>. HRMS (ESI) calcd. for C<sub>24</sub>H<sub>18</sub>F<sub>6</sub>NO<sub>2</sub> [M+H]<sup>+</sup>: 466.1236, found 466.1236.

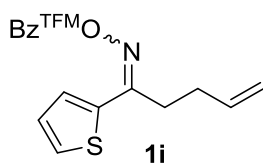

**1-(Thiophen-2-yl)pent-4-en-1-one *O*-(3,5-bis(trifluoromethyl)benzoyl) oxime (1i).** 5.0 mmol scale, purification of the crude product by column chromatography on silica gel (eluent: petroleum ether: ethyl acetate = 30:1) afforded the title product in 63% overall yield (1.32 g) as a white solid. <sup>1</sup>H NMR (400 MHz, CDCl<sub>3</sub>): δ 2.48-2.58 (m, 2H), 3.04-3.07 (m, 2H), 5.05-5.18 (m, 2H), 5.85-5.97 (m, 1H), 7.13 (dd, *J* = 4.0, 5.0 Hz, 0.6H, major), 7.21 (dd, *J* = 4.0, 5.2 Hz, 0.4H, minor), 7.51 (dd, *J* = 1.2, 5.2 Hz, 0.6H, major), 7.54 (dd, *J* = 0.8, 3.8 Hz, 0.6H, major), 7.63 (dd, *J* = 1.2, 4.0 Hz, 0.4H, minor), 7.71 (dd, *J* = 0.8, 5.2 Hz, 0.4H, minor), 8.12 (br, 1H), 8.53 (s, 1.2H, major), 8.71 (s, 0.8H, minor). <sup>13</sup>C NMR (100 MHz, CDCl<sub>3</sub>): δ 28.98, 31.40, 32.25, 33.76, 115.94, 116.40, 122.74 (q, *J* = 271.6 Hz), 122.80 (q, *J* = 270.9 Hz), 126.67 (q, *J* = 3.6 Hz), 126.75, 175.54, 129.59 (q, *J* = 2.9 Hz), 129.81, 130.17, 130.27 (br), 131.21, 131.31, 132.37 (q, *J* = 34.0 Hz), 132.46 (q, *J* = 34.0 Hz), 132.49, 132.72, 135.92, 136.26, 136.39, 158.11, 160.73, 161.56, 162.98 (2

aromatic carbon signals of the isomers are not observed due to signal overlap). IR (neat): 3076, 1764, 1644, 1618, 1596, 1458, 1434, 1383, 1279, 1217, 1170, 1127, 1113, 1001, 909, 891, 845, 754, 740, 712, 697, 681, 663, 558, 507, 495, 438, 409  $\text{cm}^{-1}$ . HRMS (ESI) calcd. for  $\text{C}_{18}\text{H}_{13}\text{F}_6\text{NNaO}_2\text{S}$   $[\text{M}+\text{Na}]^+$ : 444.0463, found 444.0463.

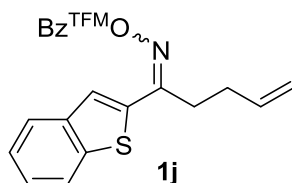

**1-(Benzo[*b*]thiophen-2-yl)pent-4-en-1-one *O*-(3,5-bis(trifluoromethyl)benzoyl) oxime (1j).** 3.0 mmol scale, purification of the crude product by recrystallization from a mixed solvent of dichloromethane and petroleum ether afforded the title product in 35% overall yield (0.49 g) as a white solid.  $^1\text{H}$  NMR (400 MHz,  $\text{CDCl}_3$ ):  $\delta$  2.53-2.59 (m, 2H), 3.14 (t,  $J = 7.6$  Hz, 2H), 5.10-5.21 (m, 2H), 5.88-5.98 (m, 1H), 7.37-7.46 (m, 2H), 7.77 (s, 1H), 7.82-7.87 (m, 2H), 8.13 (s, 1H), 8.54 (s, 2H).  $^{13}\text{C}$  NMR (100 MHz,  $\text{CDCl}_3$ ):  $\delta$  28.54, 31.49, 116.60, 122.52, 122.75 (q,  $J = 270.9$  Hz), 124.57, 124.78, 126.68, 126.78 (q,  $J = 3.6$  Hz), 127.21, 129.65 (br), 131.17, 132.52 (q,  $J = 34.0$  Hz), 135.87, 136.80, 138.86, 141.04, 160.58, 163.33. IR (neat): 3086, 2979, 1758, 1618, 1578, 1525, 1459, 1435, 1379, 1346, 1281, 1270, 1215, 1182, 1165, 1127, 1113, 1098, 998, 960, 908, 901, 838, 755, 729, 712, 701, 693, 681, 639, 559, 502, 439, 418, 409  $\text{cm}^{-1}$ . HRMS (ESI) calcd. for  $\text{C}_{22}\text{H}_{15}\text{F}_6\text{NNaO}_2\text{S}$   $[\text{M}+\text{Na}]^+$ : 494.0620, found 494.0620

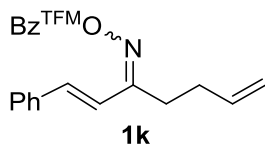

**(1*E*)-1-Phenylhepta-1,6-dien-3-one *O*-(3,5-bis(trifluoromethyl)benzoyl) oxime (1k).** 2.6 mmol scale, purification of the crude product by column chromatography on silica gel (eluent: petroleum ether: ethyl acetate = 30:1) afforded the title product in 71% overall yield (0.82 g) as a white solid.  $^1\text{H}$  NMR (400 MHz,  $\text{CDCl}_3$ ):  $\delta$  2.44-2.50 (m, 1.5H, major), 2.51-2.54 (m, 0.5H, minor), 2.85-2.89 (m, 0.5H, minor), 2.94 (t,  $J = 7.6$  Hz, 1.5H, major), 5.07-5.20 (m, 2H), 5.87-5.97 (m, 1H), 7.05 (d,  $J = 16.4$  Hz, 0.75H, major), 7.17-7.22 (m,



1H), 7.35-7.44 (m, 3.25H), 7.53-7.57 (m, 2H), 8.13 (s, 1H), 8.54 (s, 1.5H, major), 8.57 (s, 0.5H, minor). <sup>13</sup>C NMR (100 MHz, CDCl<sub>3</sub>): δ 25.96 (major), 30.24 (minor), 31.21 (major), 31.80 (minor), 115.22 (minor), 115.79 (minor), 116.21 (major), 122.42 (major), 122.70 (q, *J* = 270.8 Hz, major), 122.75 (q, *J* = 271.6 Hz, minor), 126.55 (q, *J* = 3.6 Hz, minor), 126.67 (q, *J* = 3.6 Hz, major), 127.35 (major), 127.63 (minor), 128.87 (major), 129.01 (minor), 129.55 (br, major), 130.29 (minor), 131.24 (major), 131.58 (minor), 132.35 (q, *J* = 33.9 Hz, minor), 132.40 (q, *J* = 33.9 Hz, major), 134.93 (minor), 135.23 (major), 136.08 (major), 136.58 (minor), 138.45 (major), 140.43 (minor), 160.97 (major), 161.01 (minor), 164.30 (minor), 167.29 (major) (*2 aromatic carbon signals of the isomers are not observed due to signal overlap*). IR (neat): 3076, 2977, 2936, 2922, 1754, 1625, 1585, 1450, 1383, 1349, 1278, 1220, 1173, 1124, 1113, 999, 987, 964, 920, 905, 869, 845, 752, 702, 691, 681, 638, 614, 439, 430, 408 cm<sup>-1</sup>. HRMS (ESI) calcd. for C<sub>22</sub>H<sub>18</sub>F<sub>6</sub>NO<sub>2</sub> [M+H]<sup>+</sup>: 442.1236, found 442.1236.

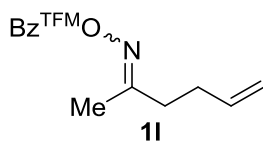

**Hex-5-en-2-one *O*-(3,5-bis(trifluoromethyl)benzoyl) oxime (11).** 10.0 mmol scale, purification of the crude product by column chromatography on silica gel (eluent: petroleum ether: ethyl acetate = 15:1) afforded the title product in 59% overall yield (2.10 g) as a yellow oil. <sup>1</sup>H NMR (600 MHz, CDCl<sub>3</sub>): δ 2.15 (s, 2.25H, major), 2.16 (s, 0.75H, minor), 2.37-2.44 (m, 2H), 2.56-2.58 (m, 1.5H, major), 2.66 (t, *J* = 7.8 Hz, 0.5H, minor), 5.05-5.15 (m, 2H), 5.80-5.89 (m, 1H), 8.10 (s, 1H), 8.50 (s, 2H). <sup>13</sup>C NMR (151 MHz, CDCl<sub>3</sub>): δ 15.59 (major), 20.09 (minor), 29.76 (minor), 30.14 (major), 30.50 (minor), 35.00 (major), 115.95 (major), 116.25 (minor), 122.71 (q, *J* = 273.2 Hz), 126.46 (q, *J* = 3.3 Hz), 129.51, 131.47 (minor), 131.57 (major), 132.28 (q, *J* = 34.1 Hz, major), 132.33 (q, *J* = 35.2 Hz, minor), 135.87 (minor), 136.18 (major), 161.18 (minor), 161.22 (major), 168.19 (major), 168.69 (minor) (*3 aromatic carbon signals of the isomers are not observed due to signal overlap*). IR (neat): 3084, 2985, 2926, 1754, 1644, 1618, 1382, 1277, 1222, 1175,

1130, 1113, 994, 911, 870, 845, 758, 698, 681, 668, 438  $\text{cm}^{-1}$ . HRMS (ESI) calcd. for  $\text{C}_{15}\text{H}_{13}\text{F}_6\text{NNaO}_2$   $[\text{M}+\text{Na}]^+$ : 376.0743, found 376.0743.

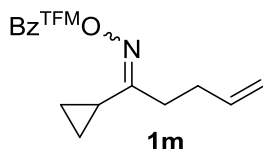

**1-Cyclopropylpent-4-en-1-one O-(3,5-bis(trifluoromethyl)benzoyl) oxime (1m).** 5.0 mmol scale, purification of the crude product by column chromatography on silica gel (eluent: petroleum ether: ethyl acetate = 20:1) afforded the title product in 45% overall yield (0.85 g) as a white solid.  $^1\text{H}$  NMR (600 MHz,  $\text{CDCl}_3$ ):  $\delta$  0.91-0.92 (m, 0.75H, minor), 0.96-0.97 (m, 2.5H, major), 1.07-1.08 (m, 0.75H, minor), 1.77-1.81 (m, 0.65H, major), 2.13-2.15 (m, 0.75H, minor), 2.27-2.29 (m, 0.35H, minor), 2.40-2.45 (m, 3.25H), 5.03-5.14 (m, 2H), 5.82-5.88 (m, 1H), 8.09 (s, 1H), 8.48 (s, 1.25H, major), 8.51 (s, 0.75H, minor).  $^{13}\text{C}$  NMR (151 MHz,  $\text{CDCl}_3$ ):  $\delta$  6.26 (minor), 6.49 (major), 10.14 (minor), 14.28 (major), 28.15 (major), 28.53 (minor), 30.64 (major), 30.88 (minor), 115.57 (minor), 115.97 (major), 122.71 (q,  $J = 273.0$  Hz, major), 122.73 (q,  $J = 273.0$  Hz, minor), 126.39 (q,  $J = 3.3$  Hz), 129.45 (q,  $J = 3.3$  Hz), 131.60 (major), 131.78 (minor), 132.23 (q,  $J = 34.1$  Hz, minor), 132.30 (q,  $J = 34.1$  Hz, major), 136.10 (major), 136.60 (minor), 160.98 (major), 161.47 (minor), 171.25 (minor), 172.44 (major) (2 aromatic carbon signals of the isomers are not observed due to signal overlap). IR (neat): 3090, 3013, 2947, 1752, 1642, 1611, 1462, 1382, 1279, 1271, 1249, 1222, 1168, 1114, 994, 912, 886, 865, 845, 829, 810, 759, 743, 698, 681, 614, 437  $\text{cm}^{-1}$ . HRMS (ESI) calcd. for  $\text{C}_{17}\text{H}_{15}\text{F}_6\text{NNaO}_2$   $[\text{M}+\text{Na}]^+$ : 402.0899, found 402.0899.

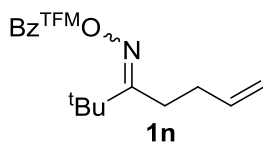

**2,2-Dimethylhept-6-en-3-one O-(3,5-bis(trifluoromethyl)benzoyl) oxime (1n).** 6.0 mmol scale, purification of the crude product by column chromatography on silica gel (eluent: petroleum ether: ethyl acetate = 25:1) afforded the title product in 83% overall

yield (1.97 g) as a light-yellow oil.  $^1\text{H}$  NMR (600 MHz,  $\text{CDCl}_3$ ):  $\delta$  1.29 (s, 9H), 2.36-2.40 (m, 2H), 2.57-2.60 (m, 2H), 5.07-5.12 (m, 2H), 5.85-5.91 (m, 1H), 8.10 (s, 1H), 8.49 (s, 2H).  $^{13}\text{C}$  NMR (151 MHz,  $\text{CDCl}_3$ ):  $\delta$  27.02, 27.41, 31.26, 38.73, 115.63, 122.76 (q,  $J = 273.0$  Hz), 126.47 (q,  $J = 3.3$  Hz), 129.49 (q,  $J = 3.3$  Hz), 131.79, 132.36 (q,  $J = 34.1$  Hz), 136.47, 161.12, 176.48. IR (neat): 3090, 2974, 2936, 2874, 1757, 1644, 1616, 1480, 1382, 1278, 1224, 1177, 1132, 1112, 1034, 995, 911, 864, 846, 793, 758, 700, 681, 621, 499, 439  $\text{cm}^{-1}$ . HRMS (ESI) calcd. for  $\text{C}_{18}\text{H}_{19}\text{F}_6\text{NNaO}_2$  [ $\text{M}+\text{Na}$ ] $^+$ : 418.1212, found 418.1211.

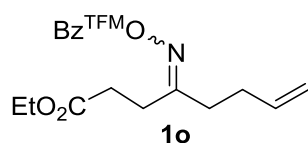

**Ethyl 4-(((3,5-bis(trifluoromethyl)benzoyl)oxy)imino)oct-7-enoate (1o).** 7.0 mmol scale, purification of the crude product by column chromatography on silica gel (eluent: petroleum ether: ethyl acetate = 50:1) afforded the title product in 65% overall yield (2.01 g) as a yellow oil.  $^1\text{H}$  NMR (600 MHz,  $\text{CDCl}_3$ ):  $\delta$  1.24-1.30 (m, 3H), 2.39-2.44 (m, 2H), 2.58-2.64 (m, 3H), 2.73-2.79 (m, 2.1H), 2.85 (t,  $J = 7.8$  Hz, 0.9H, minor), 4.15-4.20 (m, 2H), 5.06-5.14 (m, 2H), 5.82-5.85 (m, 1H), 8.10-8.11 (m, 1H), 8.47 (s, 1.1H, major), 8.50 (s, 0.9H, minor).  $^{13}\text{C}$  NMR (151 MHz,  $\text{CDCl}_3$ ):  $\delta$  13.90 (minor), 14.02 (major), 25.07, 29.59 (minor), 29.90 (major), 29.96 (minor), 30.02 (major), 30.38 (major), 35.56 (minor), 60.64 (major), 60.98 (minor), 116.03 (minor), 116.27 (major), 122.68 (q,  $J = 273.0$  Hz), 126.49 (q,  $J = 3.3$  Hz, major), 126.57 (q,  $J = 3.3$  Hz, minor), 129.48 (q,  $J = 3.3$  Hz, major), 129.57 (q,  $J = 3.3$  Hz, minor), 131.34 (minor), 131.45 (major), 132.32 (q,  $J = 34.1$  Hz, major), 132.35 (q,  $J = 34.1$  Hz, minor), 135.88 (major), 136.17 (minor), 160.89 (major), 161.05 (minor), 169.55 (major), 169.72 (minor), 171.39 (minor), 172.17 (major) (*1 aromatic carbon signal and 1 aliphatic carbon signal of the isomers are not observed due to signal overlap*). IR (neat): 3088, 2985, 2934, 1759, 1735, 1642, 1620, 1457, 1381, 1348, 1278, 1222, 1176, 1131, 1113, 1095, 1039, 911, 867, 846, 758, 699, 681, 668, 438, 413  $\text{cm}^{-1}$ . HRMS (ESI) calcd. for  $\text{C}_{19}\text{H}_{19}\text{F}_6\text{NNaO}_4$  [ $\text{M}+\text{Na}$ ] $^+$ : 462.1110, found 462.1109.

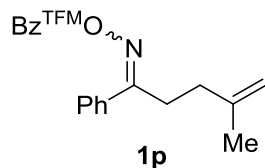

**4-Methyl-1-phenylpent-4-en-1-one *O*-(3,5-bis(trifluoromethyl)benzoyl) oxime (1p).** 5.0 mmol scale, purification of the crude product by column chromatography on silica gel (eluent: petroleum ether: ethyl acetate = 50:1) afforded the title product in 53% overall yield (1.13 g) as a white solid.  $^1\text{H}$  NMR (400 MHz,  $\text{CDCl}_3$ ):  $\delta$  1.80 (s, 3H), 2.36 (t,  $J = 8.0$  Hz, 2H), 3.12 (t,  $J = 8.0$  Hz, 2H), 4.79 (s, 1H), 4.84 (s, 1H), 7.45-7.53 (m, 3H), 7.80 (d,  $J = 7.6$  Hz, 2H), 8.13 (s, 1H), 8.56 (s, 2H).  $^{13}\text{C}$  NMR (100 MHz,  $\text{CDCl}_3$ ):  $\delta$  22.09, 27.73, 34.72, 111.44, 122.76 (q,  $J = 271.5$  Hz), 126.68 (q,  $J = 3.6$  Hz), 127.40, 128.84, 129.64 (q,  $J = 2.9$  Hz), 131.08, 131.47, 132.49 (q,  $J = 34.0$  Hz), 133.24, 143.59, 161.13, 168.29. IR (neat): 3092, 3052, 2977, 2934, 1755, 1650, 1620, 1571, 1498, 1458, 1384, 1324, 1286, 1269, 1224, 1170, 1129, 1069, 1032, 1019, 1001, 972, 945, 931, 915, 885, 843, 756,  $\nu_{\text{C}6\text{H}_6}$  698, 681, 657, 634, 610, 577, 524, 500, 441, 414  $\text{cm}^{-1}$ . HRMS (ESI) calcd. for  $\text{C}_{21}\text{H}_{17}\text{F}_6\text{NNaO}_2$   $[\text{M}+\text{Na}]^+$ : 452.1056, found 452.1056.

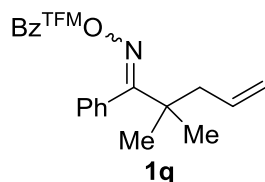

**2,2-Dimethyl-1-phenylpent-4-en-1-one *O*-(3,5-bis(trifluoromethyl)benzoyl) oxime (1q).** 13.0 mmol scale, purification of the crude product by column chromatography on silica gel (eluent: petroleum ether: ethyl acetate = 100:1) afforded the title product in 49% overall yield (2.80 g) as a white solid.  $^1\text{H}$  NMR (400 MHz,  $\text{CDCl}_3$ ):  $\delta$  1.32 (s, 6H), 2.42 (d,  $J = 7.2$  Hz, 2H), 5.11-5.18 (m, 2H), 5.89-5.99 (m, 1H), 7.13-7.16 (m, 2H), 7.45-7.48 (m, 3H), 7.89 (s, 2H), 7.94 (s, 1H).  $^{13}\text{C}$  NMR (100 MHz,  $\text{CDCl}_3$ ):  $\delta$  25.49, 41.46, 44.06, 118.51, 122.64 (q,  $J = 270.9$  Hz), 126.26 (q,  $J = 3.6$  Hz), 126.45, 128.18, 128.64, 129.42 (q,  $J = 2.9$  Hz), 131.37, 132.05 (q,  $J = 33.9$  Hz), 132.92, 133.87, 160.60, 176.11. IR (neat): 3090, 2979, 2934, 2874, 1759, 1622, 1492, 1468, 1444, 1382, 1278, 1218, 1177, 1132, 1044, 1022, 998, 912, 875, 846, 785, 757, 700, 681, 617, 580, 513, 432  $\text{cm}^{-1}$ . HRMS (ESI) calcd. for

C<sub>22</sub>H<sub>19</sub>F<sub>6</sub>NNaO<sub>2</sub> [M+Na]<sup>+</sup>: 466.1212, found 466.1212.

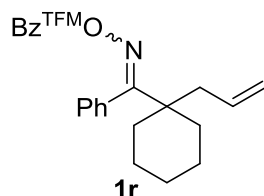

**(1-Allylcyclohexyl)(phenyl)methanone *O*-(3,5-bis(trifluoromethyl)benzoyl) oxime (1r).**

5.0 mmol scale, purification of the crude product by column chromatography on silica gel (eluent: petroleum ether: ethyl acetate = 100:1) afforded the title product in 66% overall yield (1.59 g) as a white solid. <sup>1</sup>H NMR (400 MHz, CDCl<sub>3</sub>): δ 1.45-1.70 (m, 8H), 1.98-2.02 (m, 2H), 2.42 (d, *J* = 7.2 Hz, 2H), 5.14-5.20 (m, 2H), 5.90-6.01 (m, 1H), 7.18 (t, *J* = 4.0 Hz, 2H), 7.45-7.46 (m, 3H), 7.89 (s, 2H), 7.94 (s, 1H). <sup>13</sup>C NMR (151 MHz, CDCl<sub>3</sub>): δ 22.17, 25.88, 33.43, 41.10, 45.17, 118.25, 122.66 (q, *J* = 273.0 Hz), 126.21 (q, *J* = 3.3 Hz), 126.43, 128.15, 128.65, 129.43 (q, *J* = 3.3 Hz), 131.43, 132.03 (q, *J* = 33.1 Hz), 132.75, 133.50, 160.66, 174.59. IR (neat): 3084, 2933, 2853, 1759, 1638, 1619, 1591, 1492, 1455, 1377, 1274, 1247, 1215, 1175, 1134, 1116, 1076, 1050, 1023, 1001, 925, 913, 899, 866, 844, 797, 758, 714, 699, 680, 648, 613, 581, 549, 429 cm<sup>-1</sup>. HRMS (ESI) calcd. for C<sub>25</sub>H<sub>23</sub>F<sub>6</sub>NNaO<sub>2</sub> [M+Na]<sup>+</sup>: 506.1525, found 506.1531.

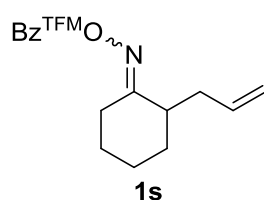

**2-Allylcyclohexan-1-one *O*-(3,5-bis(trifluoromethyl)benzoyl) oxime (1s).**

7.0 mmol scale, purification of the crude product by column chromatography on silica gel (eluent: petroleum ether: ethyl acetate = 50:1) afforded the title product in 45% overall yield (1.23 g) as a yellow oil. <sup>1</sup>H NMR (600 MHz, CDCl<sub>3</sub>): δ 1.60-1.62 (m, 1H), 1.65-1.70 (m, 1H), 1.74-1.80 (m, 3H), 1.93-1.96 (m, 1H), 2.30-2.35 (m, 1H), 2.59-2.69 (m, 4H), 5.07-5.12 (m, 1H), 5.80-5.87 (m, 1H), 8.09 (s, 1H), 8.48 (s, 2H). <sup>13</sup>C NMR (151 MHz, CDCl<sub>3</sub>): δ 22.48, 25.72, 26.26, 31.51, 35.25, 41.73, 116.87, 122.79 (q, *J* = 273.2 Hz), 126.42 (q, *J* = 3.3 Hz),

129.56 (q,  $J = 3.3$  Hz), 131.82, 132.29 (q,  $J = 34.1$  Hz), 135.76, 161.66, 172.76. IR (neat): 3082, 2977, 2940, 2859, 1752, 1640, 1449, 1382, 1277, 1223, 1175, 1130, 1112, 1095, 996, 910, 846, 758, 699, 681, 668, 438, 415  $\text{cm}^{-1}$ . HRMS (ESI) calcd. for  $\text{C}_{18}\text{H}_{17}\text{F}_6\text{NNaO}_2$   $[\text{M}+\text{Na}]^+$ : 416.1056, found 416.1056.

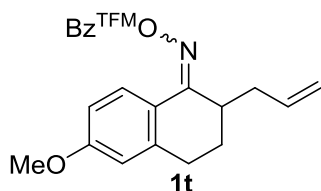

### 2-Allyl-6-methoxy-3,4-dihydronaphthalen-1(2H)-one

**O-(3,5-bis(trifluoromethyl)benzoyl) oxime (1t).** 5.0 mmol scale, purification of the crude product by column chromatography on silica gel (eluent: petroleum ether: ethyl acetate = 30:1) afforded the title product in 58% overall yield (1.38 g) as a white solid.  $^1\text{H}$  NMR (400 MHz,  $\text{CDCl}_3$ ):  $\delta$  1.97-2.08 (m, 2H), 2.32-2.39 (m, 1H), 2.42-2.49 (m, 1H), 2.73-2.77 (m, 1H), 2.96-3.05 (m, 1H), 3.63-3.68 (m, 1H), 3.84 (s, 3H), 5.11-5.18 (m, 2H), 5.82-5.92 (m, 1H), 6.69 (d,  $J = 2.0$  Hz, 1H), 6.82 (dd,  $J = 2.4, 9.0$  Hz, 1H), 8.12 (s, 1H), 8.21 (d,  $J = 8.8$  Hz, 1H), 8.56 (s, 2H).  $^{13}\text{C}$  NMR (100 MHz,  $\text{CDCl}_3$ ):  $\delta$  24.64, 24.93, 33.97, 34.09, 55.26, 112.98, 113.48, 117.36, 120.06, 122.81 (q,  $J = 271.6$  Hz), 126.50 (q,  $J = 3.6$  Hz), 128.24, 129.64 (q,  $J = 2.9$  Hz), 131.71, 132.38 (q,  $J = 33.9$  Hz), 153.20, 141.82, 161.36, 162.00, 165.82. IR (neat): 3084, 3011, 2947, 2843, 1750, 1618, 1584, 1498, 1429, 1381, 1343, 1320, 1277, 1219, 1173, 1127, 1111, 1049, 1027, 998, 953, 911, 876, 861, 843, 816, 753, 713, 699, 681, 660, 617, 594, 540, 438, 416, 408  $\text{cm}^{-1}$ . HRMS (ESI) calcd. for  $\text{C}_{23}\text{H}_{20}\text{F}_6\text{NO}_3$   $[\text{M}+\text{H}]^+$ : 472.1342, found 472.1342.

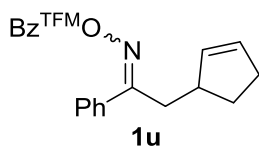

### 2-(Cyclopent-2-en-1-yl)-1-phenylethan-1-one O-(3,5-bis(trifluoromethyl)benzoyl)

**oxime (1u).** 2.0 mmol scale, purification of the crude product by column chromatography on silica gel (eluent: petroleum ether: ethyl acetate = 25:1) afforded the title product in 90% overall yield (0.79 g) as a white solid.  $^1\text{H}$  NMR (600 MHz,  $\text{CDCl}_3$ ):  $\delta$  1.58-1.64 (m, 1H),

2.11-2.17 (m, 1H), 2.30-2.35 (m, 1H), 2.43-2.49 (m, 1H), 3.01-3.11 (m, 3H), 5.65-5.66 (m, 1H), 5.81-5.82 (m, 1H), 7.46 (t,  $J = 7.2$  Hz, 2H), 7.49-7.52 (m, 1H), 7.82 (d,  $J = 7.2$  Hz, 2H), 8.12 (s, 1H), 8.55 (s, 2H).  $^{13}\text{C}$  NMR (151 MHz,  $\text{CDCl}_3$ ):  $\delta$  30.09, 31.77, 34.80, 43.36, 122.81 (q,  $J = 273.0$  Hz), 126.64 (q,  $J = 3.3$  Hz), 127.63, 128.81, 129.76 (q,  $J = 3.3$  Hz), 131.04, 131.52, 132.05, 132.44 (q,  $J = 34.1$  Hz), 133.14, 133.53, 161.23, 167.80. IR (neat): 3090, 3060, 2958, 2851, 1857, 1749, 1618, 1565, 1449, 1382, 1325, 1277, 1269, 1223, 1172, 1127, 1024, 1001, 916, 877, 845, 780, 755, 730, 699, 693, 681, 669, 644, 625, 503, 439, 416  $\text{cm}^{-1}$ . HRMS (ESI) calcd. for  $\text{C}_{22}\text{H}_{17}\text{F}_6\text{NNaO}_2$   $[\text{M}+\text{Na}]^+$ : 464.1056, found 464.1051.

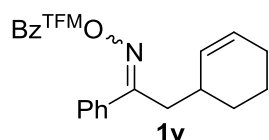

**2-(Cyclohex-2-en-1-yl)-1-phenylethan-1-one O-(3,5-bis(trifluoromethyl)benzoyl) oxime (1v).** 10.0 mmol scale, purification of the crude product by column chromatography on silica gel (eluent: petroleum ether: ethyl acetate = 30:1) afforded the title product in 57% overall yield (2.58 g) as a white solid.  $^1\text{H}$  NMR (400 MHz,  $\text{CDCl}_3$ ):  $\delta$  1.38-1.46 (m, 1H), 1.49-1.59 (m, 1H), 1.71-1.79 (m, 1H), 1.81-1.88 (m, 1H), 1.97-2.03 (m, 2H), 2.46-2.53 (m, 1H), 2.96 (dd,  $J = 7.2, 12.8$  Hz, 1H), 3.06 (dd,  $J = 8.0, 12.8$  Hz, 1H), 5.55-5.58 (m, 1H), 5.74-5.77 (m, 1H), 7.44-7.52 (m, 3H), 7.80-7.83 (m, 2H), 8.12 (s, 1H), 8.56 (s, 2H).  $^{13}\text{C}$  NMR (151 MHz,  $\text{CDCl}_3$ ):  $\delta$  20.82, 24.89, 29.40, 33.44, 34.98, 122.79 (q,  $J = 273.2$  Hz), 126.63 (q,  $J = 3.3$  Hz), 127.57, 128.81, 129.20, 129.74 (q,  $J = 3.3$  Hz), 131.03, 131.53, 132.44 (q,  $J = 34.1$  Hz), 133.53, 161.25, 167.64 (*1 aromatic carbon signal is not observed due to signal overlap*). IR (neat): 3090, 3046, 3024, 2991, 2936, 2910, 2886, 2851, 1756, 1618, 1569, 1458, 1379, 1340, 1315, 1282, 1268, 1219, 1172, 1129, 1115, 1042, 1030, 1001, 912, 892, 843, 787, 766, 753, 726, 697, 688, 680, 649, 629, 578, 531, 502, 439, 412  $\text{cm}^{-1}$ . HRMS (ESI) calcd. for  $\text{C}_{23}\text{H}_{19}\text{F}_6\text{NNaO}_2$   $[\text{M}+\text{Na}]^+$ : 478.1212 found, 478.1212.

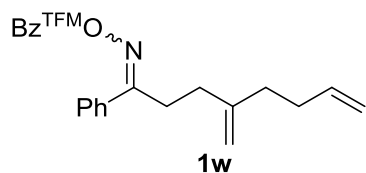

**4-Methylene-1-phenyloct-7-en-1-one *O*-(3,5-bis(trifluoromethyl)benzoyl) oxime (1w).**

2.0 mmol scale, purification of the crude product by column chromatography on silica gel (eluent: petroleum ether: ethyl acetate = 10:1) afforded the title product in 48% overall yield (0.45 g) as a white solid.  $^1\text{H}$  NMR (600 MHz,  $\text{CDCl}_3$ ):  $\delta$  2.14-2.18 (m, 4H), 2.36 (t,  $J = 8.4$  Hz, 2H), 3.13 (t,  $J = 8.4$  Hz, 2H), 4.86 (s, 1H), 4.87 (s, 1H), 4.90-4.97 (m, 2H), 5.71-5.78 (m, 1H), 7.47 (t,  $J = 7.2$  Hz, 2H), 7.51 (t,  $J = 7.2$  Hz, 1H), 7.79 (d,  $J = 7.8$  Hz, 2H), 8.13 (s, 1H), 8.55 (s, 2H).  $^{13}\text{C}$  NMR (151 MHz,  $\text{CDCl}_3$ ):  $\delta$  27.68, 31.78, 33.05, 35.12, 110.51, 114.82, 122.76 (q,  $J = 273.0$  Hz), 126.72 (q,  $J = 3.3$  Hz), 127.42, 128.85, 129.64 (q,  $J = 3.3$  Hz), 131.11, 131.46, 132.50 (q,  $J = 34.1$  Hz), 133.21, 137.73, 146.95, 161.16, 168.35. IR (neat): 3088, 2983, 2926, 2849, 1753, 1642, 1619, 1569, 1460, 1443, 1382, 1330, 1277, 1221, 1193, 1174, 1127, 1060, 998, 906, 892, 845, 770, 755, 701, 693, 681, 661, 634, 562, 522, 439, 408  $\text{cm}^{-1}$ . HRMS (ESI) calcd. for  $\text{C}_{24}\text{H}_{21}\text{F}_6\text{NNaO}_2$   $[\text{M}+\text{Na}]^+$ : 492.1369, found 492.1365.

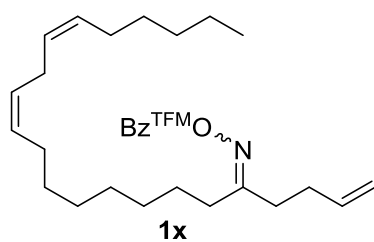

**(13Z,16Z)-Docosa-1,13,16-trien-5-one *O*-(3,5-bis(trifluoromethyl)benzoyl) oxime (1x).**

6.6 mmol scale, purification of the crude product by column chromatography on silica gel (eluent: petroleum ether: ethyl acetate = 50:1) afforded the title product in 80% overall yield (3.02 g) as a yellow oil.  $^1\text{H}$  NMR (600 MHz,  $\text{CDCl}_3$ ):  $\delta$  0.87-0.90 (m, 3H), 1.26-1.40 (m, 14H), 1.61-1.65 (m, 2H), 2.02-2.06 (m, 4H), 2.35-2.39 (m, 1H), 2.41-2.46 (m, 2H), 2.50-2.56 (m, 2H), 2.61 (t,  $J = 7.8$  Hz, 1H), 2.74-2.79 (m, 2H), 5.06 (t,  $J = 10.2$  Hz, 1H), 5.12 (dd,  $J = 2.4, 17.4$  Hz, 1H), 5.30-5.39 (m, 4H), 5.80-5.90 (m, 1H), 8.10 (s, 1H), 8.49 (s, 2H).  $^{13}\text{C}$  NMR (151 MHz,  $\text{CDCl}_3$ ):  $\delta$  13.97, 13.99, 22.50, 22.52, 25.54, 25.58, 26.16, 26.31,



27.06, 27.12, 27.15, 29.03, 29.07, 29.14, 29.17, 29.20, 29.28, 29.29, 29.44, 29.54, 29.84, 29.97, 30.18, 30.27, 31.46, 31.48, 33.60, 34.32, 115.92, 116.21, 122.76 (q,  $J = 273.0$  Hz), 126.52 (q,  $J = 3.3$  Hz), 127.80, 127.85, 128.06, 128.09, 129.55 (br), 129.81, 129.95, 130.17, 131.63, 131.67, 132.39 (q,  $J = 34.1$  Hz), 136.07, 136.47, 161.24, 171.48, 171.52 (some carbon signals of the isomers are not observed due to signal overlap). IR (neat): 3088, 3010, 2928, 2857, 1758, 1642, 1620, 1458, 1382, 1278, 1222, 1178, 1136, 1113, 1095, 995, 911, 863, 846, 757, 699, 681, 438  $\text{cm}^{-1}$ . HRMS (ESI) calcd. for  $\text{C}_{31}\text{H}_{42}\text{F}_6\text{NO}_2$   $[\text{M}+\text{H}]^+$ : 574.3114, found 574.3117.

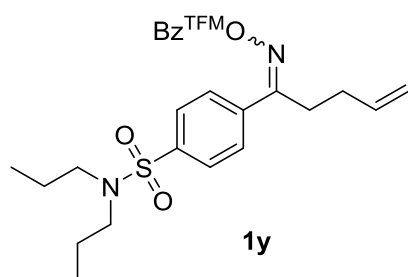

**4-(1-(((3,5-Bis(trifluoromethyl)benzoyl)oxy)imino)pent-4-en-1-yl)-N,N-dipropylbenzenesulfonamide (1y).** 5.0 mmol scale, purification of the crude product by column chromatography on silica gel (eluent: petroleum ether: ethyl acetate = 10:1) afforded the title product in 68% overall yield (1.97 g) as a white solid.  $^1\text{H}$  NMR (400 MHz,  $\text{CDCl}_3$ ):  $\delta$  0.89 (t,  $J = 7.6$  Hz, 6H), 1.52-1.62 (m, 4H), 2.43 (q,  $J = 7.6$  Hz, 2H), 3.11 (t,  $J = 7.6$  Hz, 6H), 5.08-5.15 (m, 2H), 5.80-5.90 (m, 1H), 7.88-7.93 (m, 4H), 8.15 (s, 1H), 8.55 (s, 2H).  $^{13}\text{C}$  NMR (151 MHz,  $\text{CDCl}_3$ ):  $\delta$  11.05, 21.89, 28.37, 30.62, 49.92, 116.65, 122.66 (q,  $J = 273.0$  Hz), 126.86 (q,  $J = 3.3$  Hz), 127.39, 128.06, 129.64 (q,  $J = 3.3$  Hz), 131.04, 132.52 (q,  $J = 34.1$  Hz), 135.52, 136.96, 142.49, 160.90, 166.76. IR (neat): 3086, 3048, 2973, 2936, 2882, 1755, 1644, 1613, 1458, 1378, 1338, 1277, 1220, 1163, 1128, 1092, 1044, 1017, 986, 911, 887, 842, 799, 780, 756, 733, 699, 681, 616, 595, 568, 452, 435  $\text{cm}^{-1}$ . HRMS (ESI) calcd. for  $\text{C}_{26}\text{H}_{29}\text{F}_6\text{N}_2\text{O}_4\text{S}$   $[\text{M}+\text{H}]^+$ : 579.1747, found 579.1747.

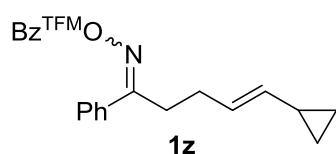

**(4E)-5-Cyclopropyl-1-phenylpent-4-en-1-one O-(3,5-bis(trifluoromethyl)benzoyl) oxime (1z).** 2.0 mmol scale, purification of the crude product by column chromatography on silica gel (eluent: petroleum ether: ethyl acetate = 25:1) afforded the title product in 68% overall yield (0.62 g) as a white solid. <sup>1</sup>H NMR (600 MHz, CDCl<sub>3</sub>): δ 0.26-0.29 (m, 2H), 0.62-0.65 (m, 2H), 1.26-1.31 (m, 0.3H, minor), 1.32-1.38 (m, 0.7H, major), 2.33-2.37 (m, 0.6H, minor), 2.52-2.56 (m, 1.4H, major), 3.03 (t, *J* = 7.8 Hz, 0.6H, minor), 3.09 (t, *J* = 7.8 Hz, 1.4H, major), 4.80 (t, *J* = 10.2 Hz, 0.7H, major), 5.03-5.07 (m, 0.3H, minor), 5.31-5.35 (m, 0.7H, major), 5.49-5.54 (m, 0.3H, minor), 7.45-7.52 (m, 3H), 7.78-7.82 (m, 2H), 8.13 (s, 1H), 8.56 (s, 2H). <sup>13</sup>C NMR (151 MHz, CDCl<sub>3</sub>): δ 6.34, 6.85, 9.51, 13.29, 24.93, 28.87, 29.33, 29.69, 122.77 (q, *J* = 273.2 Hz), 124.75, 124.98, 126.67 (q, *J* = 3.3 Hz), 127.47, 127.53, 128.77, 129.63 (q, *J* = 2.3 Hz), 131.00, 131.56, 132.47 (q, *J* = 34.1 Hz), 133.34, 133.35, 136.14, 161.16, 161.29, 168.17, 168.38 (*some aromatic carbon signals of the isomers are not observed due to signal overlap*). IR (neat): 3088, 3007, 2983, 2857, 1755, 1621, 1569, 1460, 1443, 1384, 1328, 1284, 1274, 1217, 1171, 1115, 1061, 1048, 1020, 996, 939, 888, 844, 810, 768, 754, 693, 680, 642, 613, 590, 524, 493, 438 cm<sup>-1</sup>. HRMS (ESI) calcd. for C<sub>23</sub>H<sub>19</sub>F<sub>6</sub>NNaO<sub>2</sub> [M+Na]<sup>+</sup>: 478.1212, found 478.1215.

### Synthesis of terminal alkynes

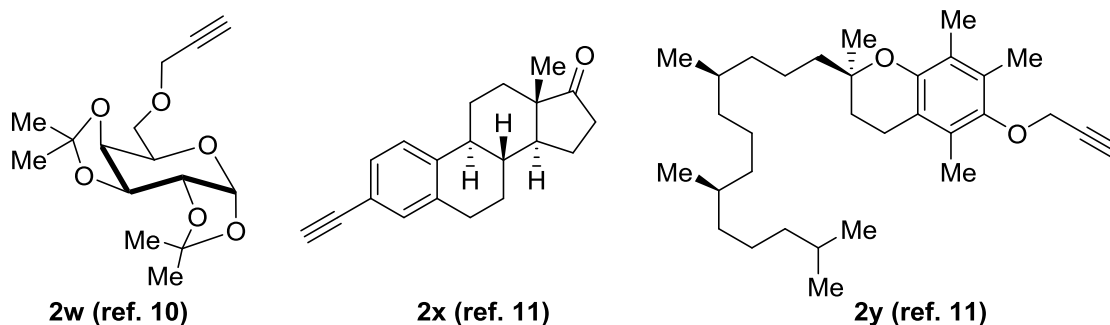

### General procedure for nickel-catalyzed iminoalkynylation of unactivated alkenes

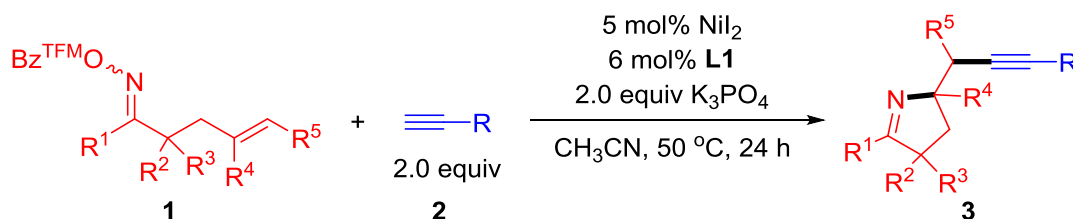

In a nitrogen-filled glovebox, NiI<sub>2</sub> (0.015 mmol, 4.7 mg), **L1** (0.018 mmol, 7.2 mg), anhydrous K<sub>3</sub>PO<sub>4</sub> (0.6 mmol, 127.4 mg) and acetonitrile (3.0 mL) were successively added to an oven-dried sealable Schlenk tube (15.0 mL). The mixture was stirred at room temperature for 5 min. Then oxime ester **1** (0.3 mmol) and terminal alkyne (0.6 mmol) were added in sequence. The tube was securely sealed with parafilm, taken outside the glovebox and immersed into an oil bath preheated at 50 °C. After stirring for 24 h, the reaction mixture was cooled to room temperature and quenched with water. The organic phase was extracted with ethyl acetate. The combined organic layers were washed with water and brine, and dried over anhydrous Na<sub>2</sub>SO<sub>4</sub>. The resulting solution was concentrated under vacuum and the residue was purified by column chromatography on silica gel to afford products **3**.

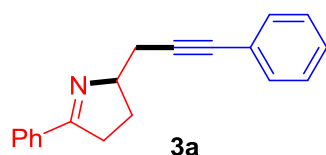

**5-Phenyl-2-(3-phenylprop-2-yn-1-yl)-3,4-dihydro-2H-pyrrole (3a).** 0.3 mmol scale, NiI<sub>2</sub> (0.015 mmol, 4.7 mg), **L1** (0.018 mmol, 7.2 mg), anhydrous K<sub>3</sub>PO<sub>4</sub> (0.6 mmol, 127.4 mg), 1-phenylpent-4-en-1-one *O*-(3,5-bis(trifluoromethyl)benzoyl) oxime **1a-3** (0.3 mmol, 124.6 mg), phenylacetylene (0.6 mmol, 61.3 mg) and acetonitrile (3.0 mL) were stirred at 50 °C for 24 h. Then the reaction mixture was quenched with water and extracted with ethyl acetate, washed with water and brine, and dried over anhydrous Na<sub>2</sub>SO<sub>4</sub>. Purification of the crude product by column chromatography on silica gel (eluent: petroleum ether: ethyl acetate: dichloromethane = 15:1:3) afforded the title product in 70% yield (54.1 mg) as a yellow oil. <sup>1</sup>H NMR (400 MHz, CDCl<sub>3</sub>): δ 1.84-1.94 (m, 2H), 2.17-2.26 (m, 1H), 2.61 (dd, *J* = 7.6, 16.4 Hz, 1H), 2.80-2.92 (m, 1H), 2.98-3.06 (m, 1H), 4.37-4.43 (m, 1H), 7.14-7.18 (m, 3H), 7.25-7.27 (m, 2H), 7.29-7.36 (m, 3H), 7.76-7.78 (m, 2H). <sup>13</sup>C NMR (100 MHz, CDCl<sub>3</sub>): δ 26.62, 27.71, 35.31, 71.66, 81.63, 87.38, 123.72, 127.54, 127.71, 128.09, 128.35, 130.46, 131.51, 134.33, 173.39. IR (neat): 3078, 3050, 2971, 2942, 2900, 2831, 2225, 1693, 1614, 1597, 1573, 1489, 1448, 1441, 1427, 1332, 1310, 1279, 1268, 1247, 1181, 1159, 1072, 1054, 1022, 992, 974, 928, 913, 762, 752, 690, 669, 649, 560, 537,

526, 514, 485, 428, 408  $\text{cm}^{-1}$ . HRMS (ESI) calcd. for  $\text{C}_{19}\text{H}_{18}\text{N}$   $[\text{M}+\text{H}]^+$ : 260.1434, found 260.1436.

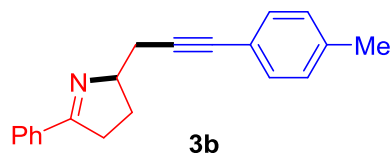

**5-Phenyl-2-(3-(*p*-tolyl)prop-2-yn-1-yl)-3,4-dihydro-2*H*-pyrrole (3b).** 0.3 mmol scale,  $\text{NiI}_2$  (0.015 mmol, 4.7 mg), **L1** (0.018 mmol, 7.2 mg), anhydrous  $\text{K}_3\text{PO}_4$  (0.6 mmol, 127.4 mg), 1-phenylpent-4-en-1-one *O*-(3,5-bis(trifluoromethyl)benzoyl) oxime **1a-3** (0.3 mmol, 124.6 mg), 1-ethynyl-4-methylbenzene (0.6 mmol, 69.7 mg) and acetonitrile (3.0 mL) were stirred at 50  $^\circ\text{C}$  for 24 h. Then the reaction mixture was quenched with water and extracted with ethyl acetate, washed with water and brine, and dried over anhydrous  $\text{Na}_2\text{SO}_4$ . Purification of the crude product by column chromatography on silica gel (eluent: petroleum ether: ethyl acetate: dichloromethane = 15:1:3) afforded the title product in 68% yield (55.9 mg) as a yellow solid.  $^1\text{H}$  NMR (400 MHz,  $\text{CDCl}_3$ ):  $\delta$  1.84-1.93 (m, 1H), 2.22 (br, 4H), 2.59 (dd,  $J = 7.6, 16.6$  Hz, 1H), 2.80-2.92 (m, 2H), 2.98-3.06 (m, 1H), 4.40 (br, 1H), 6.96 (d,  $J = 7.6$  Hz, 2H), 7.16 (d,  $J = 8.0$  Hz, 2H), 7.31-7.33 (m, 3H), 7.77 (d,  $J = 6.4$  Hz, 2H).  $^{13}\text{C}$  NMR (100 MHz,  $\text{CDCl}_3$ ):  $\delta$  21.30, 26.64, 27.71, 35.30, 71.72, 81.66, 86.53, 120.65, 127.73, 128.35, 128.85, 130.46, 131.40, 134.34, 137.52, 173.37. IR (neat): 3054, 3022, 2963, 2918, 2860, 2205, 2154, 1611, 1574, 1509, 1495, 1446, 1430, 1374, 1346, 1333, 1267, 1247, 1212, 1109, 1075, 1053, 1020, 913, 814, 754, 689, 641, 557, 530, 501, 430, 413  $\text{cm}^{-1}$ . HRMS (ESI) calcd. for  $\text{C}_{20}\text{H}_{20}\text{N}$   $[\text{M}+\text{H}]^+$ : 274.1590, found 274.1586.

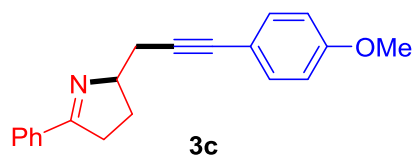

**2-(3-(4-Methoxyphenyl)prop-2-yn-1-yl)-5-phenyl-3,4-dihydro-2*H*-pyrrole (3c).** 0.3 mmol scale,  $\text{NiI}_2$  (0.015 mmol, 4.7 mg), **L1** (0.018 mmol, 7.2 mg), anhydrous  $\text{K}_3\text{PO}_4$  (0.6 mmol, 127.4 mg), 1-phenylpent-4-en-1-one *O*-(3,5-bis(trifluoromethyl)benzoyl) oxime **1a-3** (0.3 mmol, 124.6 mg), 1-ethynyl-4-methoxybenzene (0.6 mmol, 79.3 mg) and

acetonitrile (3.0 mL) were stirred at 50 °C for 24 h. Then the reaction mixture was quenched with water and extracted with ethyl acetate, washed with water and brine, and dried over anhydrous Na<sub>2</sub>SO<sub>4</sub>. Purification of the crude product by column chromatography on silica gel (eluent: petroleum ether: ethyl acetate: dichloromethane = 15:1:3) afforded the title product in 75% yield (65.5 mg) as a yellow solid. <sup>1</sup>H NMR (400 MHz, CDCl<sub>3</sub>): δ 1.84-1.93 (m, 1H), 2.17-2.26 (m, 1H), 2.59 (dd, *J* = 7.6, 16.4 Hz, 1H), 2.79-2.91 (m, 2H), 2.98-3.06 (m, 1H), 3.67 (s, 3H), 4.39 (br, 1H), 6.69 (d, *J* = 8.4 Hz, 2H), 7.19 (d, *J* = 8.4 Hz, 2H), 7.31-7.33 (m, 3H), 7.77 (d, *J* = 6.4 Hz, 2H). <sup>13</sup>C NMR (100 MHz, CDCl<sub>3</sub>): δ 26.62, 27.71, 35.27, 55.12, 71.74, 81.35, 85.69, 113.70, 115.87, 127.73, 128.34, 130.46, 132.84, 134.31, 159.01, 173.35. IR (neat): 3062, 3034, 2999, 2959, 2923, 2851, 2837, 2205, 2173, 1606, 1571, 1507, 1454, 1444, 1348, 1330, 1291, 1264, 1243, 1183, 1172, 1106, 1054, 1034, 1022, 832, 816, 798, 761, 694, 661, 558, 537, 526, 507, 431, 412, 408 cm<sup>-1</sup>. HRMS (ESI) calcd. for C<sub>20</sub>H<sub>20</sub>NO [M+H]<sup>+</sup>: 290.1539, found 290.1538.

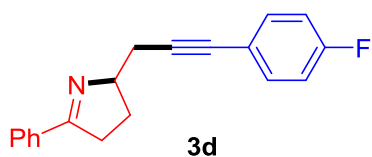

**2-(3-(4-Fluorophenyl)prop-2-yn-1-yl)-5-phenyl-3,4-dihydro-2H-pyrrole (3d).** 0.3 mmol scale, NiI<sub>2</sub> (0.015 mmol, 4.7 mg), **L1** (0.018 mmol, 7.2 mg), anhydrous K<sub>3</sub>PO<sub>4</sub> (0.6 mmol, 127.4 mg), 1-phenylpent-4-en-1-one *O*-(3,5-bis(trifluoromethyl)benzoyl) oxime **1a-3** (0.3 mmol, 124.6 mg), 1-ethynyl-4-fluorobenzene (0.6 mmol, 72.1 mg) and acetonitrile (3.0 mL) were stirred at 50 °C for 24 h. Then the reaction mixture was quenched with water and extracted with ethyl acetate, washed with water and brine, and dried over anhydrous Na<sub>2</sub>SO<sub>4</sub>. Purification of the crude product by column chromatography on silica gel (eluent: petroleum ether: ethyl acetate: dichloromethane = 15:1:6) afforded the title product in 67% yield (55.5 mg) as a yellow solid. <sup>1</sup>H NMR (400 MHz, CDCl<sub>3</sub>): δ 1.84-1.91 (m, 1H), 2.18-2.27 (m, 1H), 2.60 (dd, *J* = 7.6, 16.4 Hz, 1H), 2.81-2.90 (m, 2H), 2.98-3.06 (m, 1H), 4.38-4.41 (m, 1H), 6.85 (t, *J* = 8.4 Hz, 2H), 7.21-7.25 (m, 2H), 7.30-7.37 (m, 3H), 7.76-7.78 (m, 2H). <sup>13</sup>C NMR (100 MHz, CDCl<sub>3</sub>): δ 26.60, 27.77, 35.33, 71.65, 80.58, 87.07, 115.31 (d, *J* = 21.7 Hz), 119.81 (d, *J* = 3.6 Hz), 127.73, 128.38, 130.51, 133.33 (d, *J*

= 8.0 Hz), 134.34, 162.03 (d,  $J = 247.0$  Hz), 173.38. IR (neat): 3062, 3032, 2945, 2924, 2894, 2847, 2161, 1709, 1603, 1575, 1508, 1439, 1403, 1348, 1332, 1314, 1274, 1236, 1197, 1181, 1156, 1113, 1053, 1019, 969, 915, 858, 838, 769, 757, 691, 668, 657, 609, 549, 532, 498, 478, 452, 422, 410  $\text{cm}^{-1}$ . HRMS (ESI) calcd. for  $\text{C}_{19}\text{H}_{17}\text{FN}$   $[\text{M}+\text{H}]^+$ : 278.1340, found 278.1341.

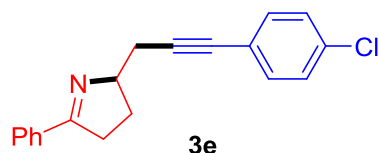

**2-(3-(4-Chlorophenyl)prop-2-yn-1-yl)-5-phenyl-3,4-dihydro-2H-pyrrole (3e).** 0.3 mmol scale,  $\text{NiI}_2$  (0.015 mmol, 4.7 mg), **L1** (0.018 mmol, 7.2 mg), anhydrous  $\text{K}_3\text{PO}_4$  (0.6 mmol, 127.4 mg), 1-phenylpent-4-en-1-one *O*-(3,5-bis(trifluoromethyl)benzoyl) oxime **1a-3** (0.3 mmol, 124.6 mg), 1-chloro-4-ethynylbenzene (0.6 mmol, 81.9 mg) and acetonitrile (3.0 mL) were stirred at 50  $^\circ\text{C}$  for 24 h. Then the reaction mixture was quenched with water and extracted with ethyl acetate, washed with water and brine, and dried over anhydrous  $\text{Na}_2\text{SO}_4$ . Purification of the crude product by column chromatography on silica gel (eluent: petroleum ether: ethyl acetate: dichloromethane = 10:1:1) afforded the title product in 70% yield (61.8 mg) as a yellow solid.  $^1\text{H}$  NMR (400 MHz,  $\text{CDCl}_3$ ):  $\delta$  1.90-1.99 (m, 1H), 2.26-2.35 (m, 1H), 2.70 (dd,  $J = 7.6, 16.8$  Hz, 1H), 2.89-2.99 (m, 2H), 3.06-3.15 (m, 1H), 4.47-4.49 (m, 1H), 7.21 (d,  $J = 8.4$  Hz, 2H), 7.26 (d,  $J = 8.4$  Hz, 2H), 7.38-7.45 (m, 3H), 7.84-7.86 (m, 2H).  $^{13}\text{C}$  NMR (100 MHz,  $\text{CDCl}_3$ ):  $\delta$  26.66, 27.78, 35.35, 71.58, 80.60, 88.54, 122.24, 127.73, 128.39, 128.42, 130.54, 132.77, 133.50, 134.31, 173.43. IR (neat): 3084, 3056, 3024, 2969, 2926, 2868, 2337, 2167, 1610, 1575, 1488, 1447, 1430, 1399, 1333, 1266, 1090, 1055, 1026, 1011, 970, 914, 827, 754, 690, 668, 583, 556, 526, 493, 473, 454, 423, 416, 407  $\text{cm}^{-1}$ . HRMS (ESI) calcd. for  $\text{C}_{19}\text{H}_{17}\text{ClN}$   $[\text{M}+\text{H}]^+$ : 294.1044, found 294.1044.

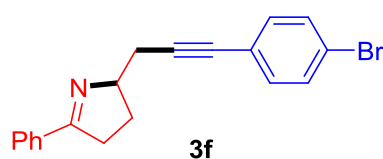

**2-(3-(4-Bromophenyl)prop-2-yn-1-yl)-5-phenyl-3,4-dihydro-2H-pyrrole (3f).** 0.3 mmol scale, NiI<sub>2</sub> (0.015 mmol, 4.7 mg), **L1** (0.018 mmol, 7.2 mg), anhydrous K<sub>3</sub>PO<sub>4</sub> (0.6 mmol, 127.4 mg), 1-phenylpent-4-en-1-one *O*-(3,5-bis(trifluoromethyl)benzoyl) oxime **1a-3** (0.3 mmol, 124.6 mg), 1-bromo-4-ethynylbenzene (0.6 mmol, 108.6 mg) and acetonitrile (3.0 mL) were stirred at 50 °C for 24 h. Then the reaction mixture was quenched with water and extracted with ethyl acetate, washed with water and brine, and dried over anhydrous Na<sub>2</sub>SO<sub>4</sub>. Purification of the crude product by column chromatography on silica gel (eluent: petroleum ether: ethyl acetate: dichloromethane = 15:1:6) afforded the title product in 66% yield (66.9 mg) as a yellow solid. <sup>1</sup>H NMR (400 MHz, CDCl<sub>3</sub>): δ 1.91-1.99 (m, 1H), 2.26-2.35 (m, 1H), 2.69 (dd, *J* = 7.2, 16.8 Hz, 1H), 2.90-2.98 (m, 2H), 3.06-3.15 (m, 1H), 4.47-4.49 (m, 1H), 7.19 (d, *J* = 8.4 Hz, 2H), 7.37 (d, *J* = 8.4 Hz, 2H), 7.39-7.46 (m, 3H), 7.84-7.86 (m, 2H). <sup>13</sup>C NMR (100 MHz, CDCl<sub>3</sub>): δ 26.70, 27.78, 35.37, 71.55, 80.68, 88.77, 121.70, 122.72, 127.75, 128.41, 130.56, 131.35, 133.03, 134.30, 173.48. IR (neat): 3107, 3080, 3056, 3026, 2969, 2930, 2890, 2866, 2161, 1978, 1905, 1611, 1586, 1575, 1485, 1447, 1428, 1393, 1346, 1340, 1266, 1214, 1097, 1072, 1054, 1024, 1009, 970, 916, 824, 758, 743, 690, 564, 549, 523, 488, 459 cm<sup>-1</sup>. HRMS (ESI) calcd. for C<sub>19</sub>H<sub>17</sub>BrN [M+H]<sup>+</sup>: 338.0539, found 338.0538.

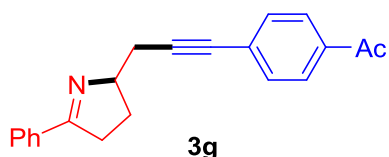

**1-(4-(3-(5-Phenyl-3,4-dihydro-2H-pyrrol-2-yl)prop-1-yn-1-yl)phenyl)ethan-1-one (3g).** 0.3 mmol scale, NiI<sub>2</sub> (0.015 mmol, 4.7 mg), **L1** (0.018 mmol, 7.2 mg), anhydrous K<sub>3</sub>PO<sub>4</sub> (0.6 mmol, 127.4 mg), 1-phenylpent-4-en-1-one *O*-(3,5-bis(trifluoromethyl)benzoyl) oxime **1a-3** (0.3 mmol, 124.6 mg), 1-(4-ethynylphenyl)ethan-1-one (0.6 mmol, 86.5 mg) and acetonitrile (3.0 mL) were stirred at 50 °C for 24 h. Then the reaction mixture was quenched with water and extracted with ethyl acetate, washed with water and brine, and dried over anhydrous Na<sub>2</sub>SO<sub>4</sub>. Purification of the crude product by column chromatography on silica gel (eluent: petroleum ether: ethyl acetate: dichloromethane = 5:1:4) afforded the title product in 69% yield (62.0 mg) as an orange solid. <sup>1</sup>H NMR (400

MHz, CDCl<sub>3</sub>):  $\delta$  1.92-2.00 (m, 1H), 2.28-2.36 (m, 1H), 2.55 (s, 3H), 2.75 (dd,  $J$  = 7.6, 16.8 Hz, 1H), 2.91-3.02 (m, 2H), 3.08-3.15 (m, 1H), 4.49-4.51 (m, 1H), 7.40-7.45 (m, 5H), 7.82-7.86 (m, 4H). <sup>13</sup>C NMR (100 MHz, CDCl<sub>3</sub>):  $\delta$  26.46, 26.77, 27.76, 35.33, 71.46, 81.12, 91.34, 127.68, 128.04, 128.35, 128.71, 130.51, 131.61, 134.23, 135.67, 173.43, 197.23. IR (neat): 3086, 3064, 3026, 2973, 2904, 2837, 2169, 1677, 1614, 1599, 1575, 1555, 1494, 1450, 1426, 1403, 1359, 1333, 1306, 1283, 1263, 1185, 1109, 1053, 1016, 956, 837, 762, 691, 630, 594, 550, 519, 497, 463, 444, 409 cm<sup>-1</sup>. HRMS (ESI) calcd. for C<sub>21</sub>H<sub>20</sub>NO [M+H]<sup>+</sup>: 302.1539, found 302.1539.

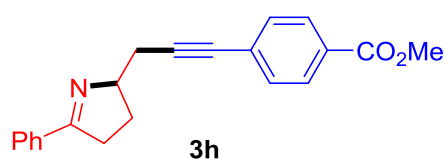

**Methyl 4-(3-(5-phenyl-3,4-dihydro-2H-pyrrol-2-yl)prop-1-yn-1-yl)benzoate (3h).** 0.3 mmol scale, NiI<sub>2</sub> (0.015 mmol, 4.7 mg), **L1** (0.018 mmol, 7.2 mg), anhydrous K<sub>3</sub>PO<sub>4</sub> (0.6 mmol, 127.4 mg), 1-phenylpent-4-en-1-one *O*-(3,5-bis(trifluoromethyl)benzoyl) oxime **1a-3** (0.3 mmol, 124.6 mg), methyl 4-ethynylbenzoate (0.6 mmol, 96.1 mg) and acetonitrile (3.0 mL) were stirred at 50 °C for 24 h. Then the reaction mixture was quenched with water and extracted with ethyl acetate, washed with water and brine, and dried over anhydrous Na<sub>2</sub>SO<sub>4</sub>. Purification of the crude product by column chromatography on silica gel (eluent: petroleum ether: ethyl acetate: dichloromethane = 15:1:6) afforded the title product in 70% yield (66.7 mg) as a yellow solid. <sup>1</sup>H NMR (400 MHz, CDCl<sub>3</sub>):  $\delta$  1.82-1.91 (m, 1H), 2.19-2.28 (m, 1H), 2.65 (dd,  $J$  = 7.6, 16.8 Hz, 1H), 2.82-2.93 (m, 2H), 2.99-3.07 (m, 1H), 3.80 (s, 3H), 4.40-4.42 (m, 1H), 7.30-7.37 (m, 5H), 7.76-7.78 (m, 2H), 7.83 (d,  $J$  = 8.4 Hz, 2H). <sup>13</sup>C NMR (100 MHz, CDCl<sub>3</sub>):  $\delta$  26.74, 27.76, 35.32, 52.03, 71.47, 81.13, 90.93, 127.70, 128.36, 128.51, 128.87, 129.28, 130.54, 131.43, 134.23, 166.49, 173.45. IR (neat): 3082, 3030, 2975, 2947, 2892, 2851, 2248, 2216, 1708, 1606, 1575, 1556, 1496, 1452, 1439, 1405, 1346, 1331, 1315, 1274, 1197, 1181, 1113, 1052, 1019, 969, 858, 845, 830, 769, 759, 692, 645, 572, 550, 533, 477 cm<sup>-1</sup>. HRMS (ESI) calcd. for C<sub>21</sub>H<sub>20</sub>NO<sub>2</sub> [M+H]<sup>+</sup>: 318.1489, found 318.1488.



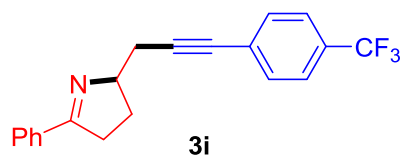

**5-Phenyl-2-(3-(4-(trifluoromethyl)phenyl)prop-2-yn-1-yl)-3,4-dihydro-2H-pyrrole (3i).**

0.3 mmol scale, NiI<sub>2</sub> (0.015 mmol, 4.7 mg), **L1** (0.018 mmol, 7.2 mg), anhydrous K<sub>3</sub>PO<sub>4</sub> (0.6 mmol, 127.4 mg), 1-phenylpent-4-en-1-one *O*-(3,5-bis(trifluoromethyl)benzoyl) oxime **1a-3** (0.3 mmol, 124.6 mg), 1-ethynyl-4-(trifluoromethyl)benzene (0.6 mmol, 102.1 mg) and acetonitrile (3.0 mL) were stirred at 50 °C for 24 h. Then the reaction mixture was quenched with water and extracted with ethyl acetate, washed with water and brine, and dried over anhydrous Na<sub>2</sub>SO<sub>4</sub>. Purification of the crude product by column chromatography on silica gel (eluent: petroleum ether: ethyl acetate: dichloromethane = 15:1:3) afforded the title product in 75% yield (73.5 mg) as a light-yellow solid. <sup>1</sup>H NMR (600 MHz, CDCl<sub>3</sub>): δ 1.92-1.98 (m, 1H), 2.29-2.35 (m, 1H), 2.75 (dd, *J* = 7.8, 17.1 Hz, 1H), 2.92-3.00 (m, 2H), 3.08-3.14 (m, 1H), 4.49-4.51 (m, 1H), 7.40-7.45 (m, 5H), 7.49 (d, *J* = 7.8 Hz, 2H), 7.86 (d, *J* = 7.2 Hz, 2H). <sup>13</sup>C NMR (151 MHz, CDCl<sub>3</sub>): δ 26.70, 27.79, 35.37, 71.50, 80.57, 90.35, 123.94 (q, *J* = 272.1 Hz), 125.04 (q, *J* = 3.3 Hz), 127.61, 127.73, 128.41, 129.32 (q, *J* = 33.1 Hz), 130.57, 131.78, 134.30, 173.48. IR (neat): 3086, 3056, 3032, 2928, 2902, 2223, 1928, 1612, 1574, 1512, 1495, 1448, 1432, 1404, 1322, 1270, 1214, 1162, 1151, 1121, 1103, 1066, 1017, 953, 916, 841, 761, 718, 690, 649, 596, 567, 550, 523, 495, 457, 414 cm<sup>-1</sup>. HRMS (ESI) calcd. for C<sub>20</sub>H<sub>17</sub>F<sub>3</sub>N [M+H]<sup>+</sup>: 328.1308, found 328.1308.

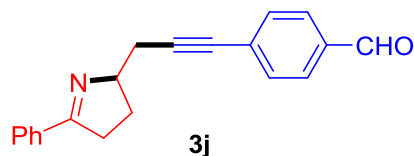

**4-(3-(5-Phenyl-3,4-dihydro-2H-pyrrol-2-yl)prop-1-yn-1-yl)benzaldehyde (3j).**

0.3 mmol scale, NiI<sub>2</sub> (0.015 mmol, 4.7 mg), **L1** (0.018 mmol, 7.2 mg), anhydrous K<sub>3</sub>PO<sub>4</sub> (0.6 mmol, 127.4 mg), 1-phenylpent-4-en-1-one *O*-(3,5-bis(trifluoromethyl)benzoyl) oxime **1a-3** (0.3 mmol, 124.6 mg), 4-ethynylbenzaldehyde (0.6 mmol, 78.1 mg) and acetonitrile (3.0 mL) were stirred at 50 °C for 24 h. Then the reaction mixture was quenched with

water and extracted with dichloromethane, washed with water and brine, and dried over anhydrous Na<sub>2</sub>SO<sub>4</sub>. Purification of the crude product by column chromatography on silica gel (eluent: petroleum ether: ethyl acetate: dichloromethane = 10:1:5) afforded the title product in 47% yield (40.1 mg) as a brown solid. <sup>1</sup>H NMR (400 MHz, CDCl<sub>3</sub>): δ 1.92-2.00 (m, 1H), 2.29-2.38 (m, 1H), 2.76 (dd, *J* = 7.6, 17.0 Hz, 1H), 2.92-3.03 (m, 2H), 3.08-3.17 (m, 1H), 4.49-4.52 (m, 1H), 7.39-7.44 (m, 3H), 7.48 (d, *J* = 8.0 Hz, 2H), 7.76 (d, *J* = 8.0 Hz, 2H), 7.85-7.87 (m, 2H), 9.96 (s, 1H). <sup>13</sup>C NMR (100 MHz, CDCl<sub>3</sub>): δ 26.82, 27.80, 35.38, 71.45, 81.14, 92.26, 127.72, 128.40, 129.39, 130.16, 130.58, 132.07, 134.25, 134.97, 173.50, 191.39. IR (neat): 3058, 3026, 2934, 2837, 2740, 2306, 2203, 1704, 1615, 1601, 1575, 1562, 1497, 1448, 1427, 1385, 1335, 1306, 1268, 1207, 1169, 1101, 1075, 1054, 1018, 915, 826, 760, 715, 691, 635, 555, 530, 489, 438, 413, 408 cm<sup>-1</sup>. HRMS (ESI) calcd. for C<sub>20</sub>H<sub>18</sub>NO [M+H]<sup>+</sup>: 288.1383, found 288.1381.

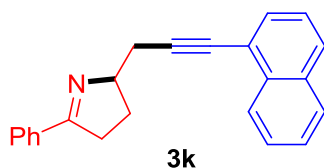

**2-(3-(Naphthalen-1-yl)prop-2-yn-1-yl)-5-phenyl-3,4-dihydro-2H-pyrrole (3k).** 0.3 mmol scale, NiI<sub>2</sub> (0.015 mmol, 4.7 mg), **L1** (0.018 mmol, 7.2 mg), anhydrous K<sub>3</sub>PO<sub>4</sub> (0.6 mmol, 127.4 mg), 1-phenylpent-4-en-1-one *O*-(3,5-bis(trifluoromethyl)benzoyl) oxime **1a-3** (0.3 mmol, 124.6 mg), 1-ethynylnaphthalene (0.6 mmol, 91.3 mg) and acetonitrile (3.0 mL) were stirred at 50 °C for 24 h. Then the reaction mixture was quenched with water and extracted with ethyl acetate, washed with water and brine, and dried over anhydrous Na<sub>2</sub>SO<sub>4</sub>. Purification of the crude product by column chromatography on silica gel (eluent: petroleum ether: ethyl acetate: dichloromethane = 13:1:3) afforded the title product in 71% yield (66.2 mg) as a yellow solid. <sup>1</sup>H NMR (400 MHz, CDCl<sub>3</sub>): δ 2.00-2.09 (m, 1H), 2.28-2.37 (m, 1H), 2.88-2.99 (m, 2H), 3.06-3.16 (m, 2H), 4.56-4.59 (m, 1H), 7.21-7.25 (m, 1H), 7.31-7.35 (m, 1H), 7.38-7.44 (m, 4H), 7.57 (d, *J* = 7.2 Hz, 1H), 7.74 (dd, *J* = 8.0, 15.4 Hz, 2H), 7.89 (dd, *J* = 1.6, 7.4 Hz, 2H), 8.22 (d, *J* = 8.4 Hz, 1H). <sup>13</sup>C NMR (100 MHz, CDCl<sub>3</sub>): δ 26.95, 27.59, 35.51, 71.65, 79.77, 92.36, 121.42, 125.08,

126.10, 126.21, 126.35, 127.82, 127.94, 128.01, 128.38, 129.95, 130.49, 133.01, 133.40, 134.38, 173.42. IR (neat): 3103, 3054, 2973, 2916, 2898, 2870, 2831, 2219, 1808, 1735, 1612, 1586, 1575, 1494, 1447, 1427, 1394, 1344, 1330, 1277, 1251, 1207, 1174, 1074, 1055, 1025, 962, 919, 862, 846, 794, 771, 759, 690, 670, 632, 562, 543, 504, 480, 434  $\text{cm}^{-1}$ . HRMS (ESI) calcd. for  $\text{C}_{23}\text{H}_{20}\text{N}$   $[\text{M}+\text{H}]^+$ : 310.1590, found 310.1590.

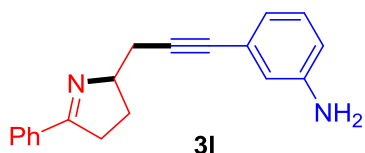

**3-(3-(5-Phenyl-3,4-dihydro-2H-pyrrol-2-yl)prop-1-yn-1-yl)aniline (31).** 0.3 mmol scale,  $\text{NiI}_2$  (0.015 mmol, 4.7 mg), **L1** (0.018 mmol, 7.2 mg), anhydrous  $\text{K}_3\text{PO}_4$  (0.6 mmol, 127.4 mg), 1-phenylpent-4-en-1-one *O*-(3,5-bis(trifluoromethyl)benzoyl) oxime **1a-3** (0.3 mmol, 124.6 mg), 3-ethynylaniline (0.6 mmol, 70.3 mg) and acetonitrile (3.0 mL) were stirred at 50 °C for 24 h. Then the reaction mixture was quenched with water and extracted with ethyl acetate, washed with water and brine, and dried over anhydrous  $\text{Na}_2\text{SO}_4$ . Purification of the crude product by column chromatography on silica gel (eluent: petroleum ether: ethyl acetate: dichloromethane = 5:2:10) afforded the title product in 45% yield (37.3 mg) as a light-yellow solid.  $^1\text{H}$  NMR (400 MHz,  $\text{CDCl}_3$ ):  $\delta$  1.92-2.04 (m, 1H), 2.25-2.34 (m, 1H), 2.68 (dd,  $J = 7.6, 16.8$  Hz, 1H), 2.88-2.98 (m, 2H), 3.06-3.15 (m, 1H), 3.50 (br, 2H), 4.47-4.50 (m, 1H), 6.56 (dd,  $J = 2.4, 7.8$  Hz, 1H), 6.63-6.64 (m, 1H), 6.75 (d,  $J = 7.6$  Hz, 1H), 7.02 (t,  $J = 7.6$  Hz, 1H), 7.38-7.45 (m, 3H), 7.84-7.87 (m, 2H).  $^{13}\text{C}$  NMR (100 MHz,  $\text{CDCl}_3$ ):  $\delta$  26.61, 27.68, 35.34, 71.66, 81.85, 86.72, 114.66, 117.92, 121.87, 124.38, 127.76, 128.36, 129.03, 130.47, 134.35, 146.11, 173.42. IR (neat): 3432, 3316, 3211, 3060, 2973, 2927, 2903, 2333, 2163, 1917, 1727, 1633, 1596, 1573, 1484, 1448, 1415, 1381, 1341, 1320, 1293, 1263, 1204, 1157, 1086, 1047, 993, 880, 782, 763, 689, 668, 650, 604, 559, 528, 456, 423  $\text{cm}^{-1}$ . HRMS (ESI) calcd. for  $\text{C}_{19}\text{H}_{19}\text{N}_2$   $[\text{M}+\text{H}]^+$ : 275.1543, found 275.1543.

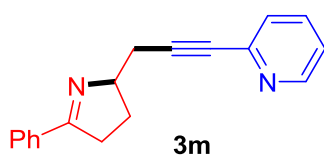

**2-(3-(5-Phenyl-3,4-dihydro-2H-pyrrol-2-yl)prop-1-yn-1-yl)pyridine (3m).** 0.3 mmol scale, NiI<sub>2</sub> (0.015 mmol, 4.7 mg), L1 (0.018 mmol, 7.2 mg), anhydrous K<sub>3</sub>PO<sub>4</sub> (0.6 mmol, 127.4 mg), 1-phenylpent-4-en-1-one *O*-(3,5-bis(trifluoromethyl)benzoyl) oxime **1a-3** (0.3 mmol, 124.6 mg), 2-ethynylpyridine (0.6 mmol, 61.9 mg) and acetonitrile (3.0 mL) were stirred at 50 °C for 24 h. Then the reaction mixture was quenched with water and extracted with ethyl acetate, washed with water and brine, and dried over anhydrous Na<sub>2</sub>SO<sub>4</sub>. Purification of the crude product by column chromatography on silica gel (eluent: petroleum ether: ethyl acetate: dichloromethane = 1:1:5 to 1:3:5, gradient) afforded the title product in 63% yield (49.5 mg) as a yellow oil. <sup>1</sup>H NMR (400 MHz, CDCl<sub>3</sub>): δ 1.95-2.02 (m, 1H), 2.31-2.38 (m, 1H), 2.69 (dd, *J* = 8.0, 16.8 Hz, 1H), 2.92-2.98 (m, 1H), 3.02-3.13 (m, 2H), 4.29-4.53 (m, 1H), 7.14-7.17 (m, 1H), 7.32 (d, *J* = 7.6 Hz, 1H), 7.38-7.43 (m, 3H), 7.57 (td, *J* = 2.0, 7.6 Hz, 1H), 7.85 (dd, *J* = 2.0, 7.6 Hz, 2H), 8.53 (d, *J* = 4.4 Hz, 1H). <sup>13</sup>C NMR (100 MHz, CDCl<sub>3</sub>): δ 26.52, 27.86, 35.20, 71.39, 81.28, 88.09, 122.27, 126.81, 127.68, 128.30, 130.45, 134.23, 135.89, 143.59, 149.68, 173.45. IR (neat): 3084, 3048, 3005, 2902, 2833, 2226, 1970, 1614, 1581, 1561, 1492, 1466, 1446, 1426, 1331, 1310, 1274, 1251, 1176, 1155, 1094, 1079, 1054, 1022, 1002, 979, 937, 902, 776, 765, 745, 698, 647, 628, 564, 549, 538, 531, 518, 498, 445, 405 cm<sup>-1</sup>. HRMS (ESI) calcd. for C<sub>18</sub>H<sub>17</sub>N<sub>2</sub> [M+H]<sup>+</sup>: 261.1386, found 261.1387.

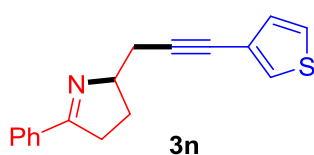

**5-Phenyl-2-(3-(thiophen-3-yl)prop-2-yn-1-yl)-3,4-dihydro-2H-pyrrole (3n).** 0.3 mmol scale, NiI<sub>2</sub> (0.015 mmol, 4.7 mg), L1 (0.018 mmol, 7.2 mg), anhydrous K<sub>3</sub>PO<sub>4</sub> (0.6 mmol, 127.4 mg), 1-phenylpent-4-en-1-one *O*-(3,5-bis(trifluoromethyl)benzoyl) oxime **1a-3** (0.3 mmol, 124.6 mg), 3-ethynylthiophene (0.6 mmol, 64.9 mg) and acetonitrile (3.0 mL) were stirred at 50 °C for 24 h. Then the reaction mixture was quenched with water and extracted with ethyl acetate, washed with water and brine, and dried over anhydrous Na<sub>2</sub>SO<sub>4</sub>. Purification of the crude product by column chromatography on silica gel (eluent: petroleum ether: ethyl acetate: dichloromethane = 15:1:3) afforded the title product in 76%

yield (60.2 mg) as a yellow solid.  $^1\text{H}$  NMR (400 MHz,  $\text{CDCl}_3$ ):  $\delta$  1.84-1.91 (m, 1H), 2.17-2.26 (m, 1H), 2.59 (dd,  $J = 7.6, 16.6$  Hz, 1H), 2.80-2.91 (m, 2H), 2.98-3.05 (m, 1H), 4.37-4.41 (m, 1H), 6.93-6.94 (m, 1H), 7.10-7.12 (m, 1H), 7.22 (d,  $J = 2.4$  Hz, 1H), 7.29-7.35 (m, 3H), 7.77 (dd,  $J = 2.0, 7.8$  Hz, 2H).  $^{13}\text{C}$  NMR (100 MHz,  $\text{CDCl}_3$ ):  $\delta$  26.62, 27.76, 35.30, 71.64, 76.65, 86.91, 122.68, 124.90, 127.71, 127.75, 128.35, 129.91, 130.48, 134.33, 173.37. IR (neat): 3101, 3082, 2969, 2922, 2902, 2870, 2833, 2163, 1964, 1614, 1574, 1494, 1447, 1427, 1332, 1310, 1257, 1184, 1077, 1053, 1021, 1009, 988, 855, 801, 782, 761, 693, 628, 559, 510  $\text{cm}^{-1}$ . HRMS (ESI) calcd. for  $\text{C}_{17}\text{H}_{16}\text{NS}$   $[\text{M}+\text{H}]^+$ : 266.0998, found 266.0996.

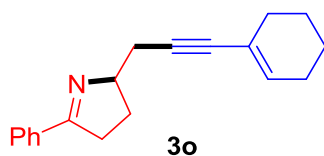

**2-(3-(Cyclohex-1-en-1-yl)prop-2-yn-1-yl)-5-phenyl-3,4-dihydro-2H-pyrrole (3o).** 0.3 mmol scale,  $\text{NiI}_2$  (0.015 mmol, 4.7 mg), **L1** (0.018 mmol, 7.2 mg), anhydrous  $\text{K}_3\text{PO}_4$  (0.6 mmol, 127.4 mg), 1-phenylpent-4-en-1-one *O*-(3,5-bis(trifluoromethyl)benzoyl) oxime **1a-3** (0.3 mmol, 124.6 mg), 1-ethynylcyclohex-1-ene (0.6 mmol, 63.7 mg) and acetonitrile (3.0 mL) were stirred at 50  $^\circ\text{C}$  for 24 h. Then the reaction mixture was quenched with water and extracted with ethyl acetate, washed with water and brine, and dried over anhydrous  $\text{Na}_2\text{SO}_4$ . Purification of the crude product by column chromatography on silica gel (eluent: petroleum ether: ethyl acetate: dichloromethane = 15:1:3) afforded the title product in 60% yield (47.4 mg) as a yellow solid.  $^1\text{H}$  NMR (400 MHz,  $\text{CDCl}_3$ ):  $\delta$  1.45-1.52 (m, 4H), 1.78-1.87 (m, 1H), 1.96-1.98 (m, 4H), 2.15-2.21 (m, 1H), 2.47 (dd,  $J = 8.0, 16.8$  Hz, 1H), 2.78-2.87 (m, 2H), 2.96-3.05 (m, 1H), 4.31-4.35 (m, 1H), 5.90 (br, 1H), 7.29-7.35 (m, 3H), 7.75-7.77 (m, 2H).  $^{13}\text{C}$  NMR (100 MHz,  $\text{CDCl}_3$ ):  $\delta$  21.48, 22.27, 25.45, 26.52, 27.68, 29.40, 35.23, 71.87, 83.40, 84.33, 120.84, 127.70, 128.31, 130.38, 133.45, 134.44, 173.18. IR (neat): 3103, 3080, 3056, 3026, 2965, 2932, 2913, 2861, 2835, 2163, 1615, 1575, 1495, 1447, 1427, 1333, 1273, 1255, 1212, 1139, 1075, 1054, 1024, 917, 841, 802, 754, 689, 668, 646, 586, 555, 538, 525, 495, 455, 424  $\text{cm}^{-1}$ . HRMS (ESI) calcd. for  $\text{C}_{19}\text{H}_{22}\text{N}$   $[\text{M}+\text{H}]^+$ : 264.1747, found 264.1746.

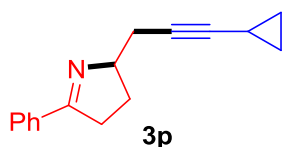

**2-(3-Cyclopropylprop-2-yn-1-yl)-5-phenyl-3,4-dihydro-2H-pyrrole (3p).** 0.3 mmol scale, NiI<sub>2</sub> (0.015 mmol, 4.7 mg), **L1** (0.018 mmol, 7.2 mg), anhydrous K<sub>3</sub>PO<sub>4</sub> (0.6 mmol, 127.4 mg), 1-phenylpent-4-en-1-one *O*-(3,5-bis(trifluoromethyl)benzoyl) oxime **1a-3** (0.3 mmol, 124.6 mg), ethynylcyclopropane (0.6 mmol, 39.7 mg) and acetonitrile (3.0 mL) were stirred at 80 °C for 24 h. Then the reaction mixture was quenched with water and extracted with ethyl acetate, washed with water and brine, and dried over anhydrous Na<sub>2</sub>SO<sub>4</sub>. Purification of the crude product by column chromatography on silica gel (eluent: petroleum ether: ethyl acetate: dichloromethane = 13:1:3) afforded the title product in 54% yield (35.9 mg) as a yellow oil. <sup>1</sup>H NMR (400 MHz, CDCl<sub>3</sub>): δ 0.54-0.58 (m, 2H), 0.65-0.69 (m, 2H), 1.15-1.19 (m, 1H), 1.83-1.89 (m, 1H), 2.20-2.25 (m, 1H), 2.35-2.42 (m, 1H), 2.67-2.73 (m, 1H), 2.90-2.94 (m, 1H), 3.01-3.06 (m, 1H), 4.33-4.36 (m, 1H), 7.37-7.43 (m, 3H), 7.82-7.85 (m, 2H). <sup>13</sup>C NMR (100 MHz, CDCl<sub>3</sub>): δ 0.47, 7.89, 7.90, 26.02, 27.66, 35.22, 71.97, 72.62, 84.40, 127.69, 128.33, 130.38, 134.45, 173.08. IR (neat): 3084, 3058, 3005, 2922, 2868, 2841, 2252, 1614, 1575, 1496, 1448, 1427, 1340, 1312, 1256, 1178, 1054, 1026, 923, 885, 812, 760, 692, 641, 557, 479, 412 cm<sup>-1</sup>. HRMS (ESI) calcd. for C<sub>16</sub>H<sub>18</sub>N [M+H]<sup>+</sup>: 224.1434, found 224.1434.

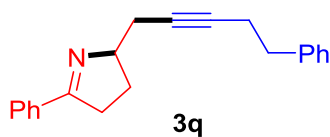

**5-Phenyl-2-(5-phenylpent-2-yn-1-yl)-3,4-dihydro-2H-pyrrole (3q).** 0.3 mmol scale, NiI<sub>2</sub> (0.015 mmol, 4.7 mg), **L1** (0.018 mmol, 7.2 mg), anhydrous K<sub>3</sub>PO<sub>4</sub> (0.6 mmol, 127.4 mg), 1-phenylpent-4-en-1-one *O*-(3,5-bis(trifluoromethyl)benzoyl) oxime **1a-3** (0.3 mmol, 124.6 mg), but-3-yn-1-ylbenzene (0.6 mmol, 78.1 mg) and acetonitrile (3.0 mL) were stirred at 80 °C for 24 h. Then the reaction mixture was quenched with water and extracted with ethyl acetate, washed with water and brine, and dried over anhydrous Na<sub>2</sub>SO<sub>4</sub>. Purification of the crude product by column chromatography on silica gel (eluent:

petroleum ether: ethyl acetate: dichloromethane = 10:1:3) afforded the title product in 54% yield (46.4 mg) as a yellow solid. <sup>1</sup>H NMR (400 MHz, CDCl<sub>3</sub>): δ 1.76-1.85 (m, 1H), 2.13-2.22 (m, 1H), 2.38-2.45 (m, 3H), 2.69-2.78 (m, 3H), 2.81-2.90 (m, 1H), 2.95-3.04 (m, 1H), 4.30-4.36 (m, 1H), 7.16-7.19 (m, 3H), 7.23-7.26 (m, 2H), 7.37-7.44 (m, 3H), 7.82-7.84 (m, 2H). <sup>13</sup>C NMR (100 MHz, CDCl<sub>3</sub>): δ 20.86, 25.96, 27.61, 35.19, 35.33, 71.89, 78.03, 80.66, 126.06, 127.70, 128.20, 128.32, 128.35, 130.38, 134.43, 140.85, 173.09. IR (neat): 3080, 3026, 2981, 2940, 2904, 2878, 2837, 2199, 1613, 1574, 1494, 1448, 1433, 1346, 1256, 1212, 1176, 1076, 1055, 1025, 913, 761, 739, 700, 690, 651, 590, 558, 499, 422 cm<sup>-1</sup>. HRMS (ESI) calcd. for C<sub>21</sub>H<sub>22</sub>N [M+H]<sup>+</sup>: 288.1747, found 288.1746.

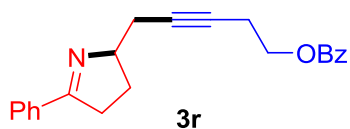

**5-(5-Phenyl-3,4-dihydro-2H-pyrrol-2-yl)pent-3-yn-1-yl benzoate (3r).** 0.3 mmol scale, NiI<sub>2</sub> (0.015 mmol, 4.7 mg), **L1** (0.018 mmol, 7.2 mg), anhydrous K<sub>3</sub>PO<sub>4</sub> (0.6 mmol, 127.4 mg), 1-phenylpent-4-en-1-one *O*-(3,5-bis(trifluoromethyl)benzoyl) oxime **1a-3** (0.3 mmol, 124.6 mg), but-3-yn-1-yl benzoate (0.6 mmol, 104.5 mg) and acetonitrile (3.0 mL) were stirred at 80 °C for 24 h. Then the reaction mixture was quenched with water and extracted with ethyl acetate, washed with water and brine, and dried over anhydrous Na<sub>2</sub>SO<sub>4</sub>. Purification of the crude product by column chromatography on silica gel (eluent: petroleum ether: ethyl acetate: dichloromethane = 10:1:5) afforded the title product in 70% yield (69.8 mg) as a yellow solid. <sup>1</sup>H NMR (400 MHz, CDCl<sub>3</sub>): δ 1.80-1.89 (m, 1H), 2.16-2.25 (m, 1H), 2.41-2.48 (m, 1H), 2.59-2.63 (m, 2H), 2.70-2.76 (m, 1H), 2.82-2.90 (m, 1H), 2.99-3.07 (m, 1H), 4.32-4.37 (m, 3H), 7.35-7.44 (m, 5H), 7.52-7.56 (m, 1H), 7.80-7.84 (m, 2H), 8.03-8.05 (m, 2H). <sup>13</sup>C NMR (100 MHz, CDCl<sub>3</sub>): δ 19.33, 25.87, 27.58, 35.17, 63.11, 71.67, 76.76, 79.16, 127.64, 128.23, 128.30, 129.52, 129.99, 130.40, 132.88, 134.26, 166.20, 173.19. IR (neat): 3066, 2963, 2932, 2900, 2868, 2205, 1719, 1616, 1600, 1575, 1494, 1451, 1391, 1330, 1313, 1286, 1268, 1257, 1234, 1178, 1158, 1107, 1100, 1071, 1053, 1023, 968, 921, 834, 761, 709, 690, 677, 659, 615, 559, 486, 406 cm<sup>-1</sup>. HRMS (ESI) calcd. for C<sub>22</sub>H<sub>22</sub>NO<sub>2</sub> [M+H]<sup>+</sup>: 332.1645, found 332.1640.

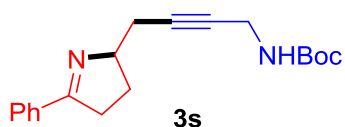

**tert-Butyl (4-(5-phenyl-3,4-dihydro-2H-pyrrol-2-yl)but-2-yn-1-yl)carbamate (3s).** 0.3 mmol scale, NiI<sub>2</sub> (0.015 mmol, 4.7 mg), **L1** (0.018 mmol, 7.2 mg), anhydrous K<sub>3</sub>PO<sub>4</sub> (0.6 mmol, 127.4 mg), 1-phenylpent-4-en-1-one *O*-(3,5-bis(trifluoromethyl)benzoyl) oxime **1a-3** (0.3 mmol, 124.6 mg), *tert*-butyl prop-2-yn-1-ylcarbamate (0.6 mmol, 93.1 mg) and acetonitrile (3.0 mL) were stirred at 80 °C for 24 h. Then the reaction mixture was quenched with water and extracted with ethyl acetate, washed with water and brine, and dried over anhydrous Na<sub>2</sub>SO<sub>4</sub>. Purification of the crude product by column chromatography on silica gel (eluent: petroleum ether: ethyl acetate: dichloromethane = 5:1:15) afforded the title product in 58% yield (54.6 mg) as a light-yellow solid. <sup>1</sup>H NMR (400 MHz, CDCl<sub>3</sub>): δ 1.43 (m, 9H), 1.80-1.89 (m, 1H), 2.21-2.30 (m, 1H), 2.42-2.49 (m, 1H), 2.70-2.75 (m, 1H), 2.87-2.95 (m, 1H), 3.04-3.12 (m, 1H), 3.87 (br, 2H), 4.33-4.39 (m, 1H), 4.66 (br, 1H), 7.38-7.45 (m, 3H), 7.83-7.85 (m, 2H). <sup>13</sup>C NMR (151 MHz, CDCl<sub>3</sub>): δ 25.91, 27.72, 28.29, 30.77, 35.28, 71.55, 77.24, 79.64, 80.80, 127.72, 128.38, 130.50, 134.32, 155.25, 173.35. IR (neat): 3345, 3048, 2993, 2972, 2929, 2902, 2872, 2278, 1682, 1614, 1571, 1515, 1458, 1447, 1429, 1390, 1364, 1341, 1267, 1249, 1164, 1116, 1076, 1049, 1025, 964, 917, 875, 782, 758, 692, 668, 607, 558, 505, 462, 412 cm<sup>-1</sup>. HRMS (ESI) calcd. for C<sub>19</sub>H<sub>25</sub>N<sub>2</sub>O<sub>2</sub> [M+H]<sup>+</sup>: 313.1911, found 313.1911.

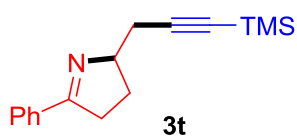

**5-Phenyl-2-(3-(trimethylsilyl)prop-2-yn-1-yl)-3,4-dihydro-2H-pyrrole (3t).** 0.3 mmol scale, NiI<sub>2</sub> (0.015 mmol, 4.7 mg), **L1** (0.018 mmol, 7.2 mg), anhydrous K<sub>3</sub>PO<sub>4</sub> (0.6 mmol, 127.4 mg), 1-phenylpent-4-en-1-one *O*-(3,5-bis(trifluoromethyl)benzoyl) oxime **1a-3** (0.3 mmol, 124.6 mg), ethynyltrimethylsilane (0.6 mmol, 58.9 mg) and acetonitrile (3.0 mL) were stirred at 80 °C for 24 h. Then the reaction mixture was quenched with water and extracted with ethyl acetate, washed with water and brine, and dried over anhydrous



Na<sub>2</sub>SO<sub>4</sub>. Purification of the crude product by column chromatography on silica gel (eluent: petroleum ether: ethyl acetate: dichloromethane = 30:1:10 to 15:1:3, gradient) afforded the title product in 50% yield (38.2 mg) as a light-yellow oil. <sup>1</sup>H NMR (400 MHz, CDCl<sub>3</sub>): δ 0.94 (s, 9H), 1.87-1.96 (m, 1H), 2.21-2.30 (m, 1H), 2.50 (dd, *J* = 7.6, 16.8 Hz, 1H), 2.79 (dd, *J* = 4.4, 16.8 Hz, 1H), 2.87-2.96 (m, 1H), 3.03-3.12 (m, 1H), 4.38-4.44 (m, 1H), 7.37-7.44 (m, 3H), 7.82-7.85 (m, 2H). <sup>13</sup>C NMR (100 MHz, CDCl<sub>3</sub>): δ -0.02, 27.10, 27.57, 35.40, 71.51, 85.82, 104.48, 121.72, 128.34, 130.46, 134.37, 173.38. IR (neat): 3080, 3058, 3032, 2958, 2898, 2174, 1765, 1705, 1616, 1577, 1494, 1448, 1427, 1341, 1280, 1249, 1176, 1141, 1057, 1017, 972, 838, 758, 692, 643, 556, 445 cm<sup>-1</sup>. HRMS (ESI) calcd. for C<sub>16</sub>H<sub>22</sub>NSi [M+H]<sup>+</sup>: 256.1516, found 256.1516.

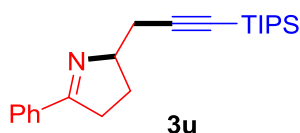

**5-Phenyl-2-(3-(triisopropylsilyl)prop-2-yn-1-yl)-3,4-dihydro-2H-pyrrole (3u).** 0.3 mmol scale, NiI<sub>2</sub> (0.015 mmol, 4.7 mg), **L1** (0.018 mmol, 7.2 mg), anhydrous K<sub>3</sub>PO<sub>4</sub> (0.6 mmol, 127.4 mg), 1-phenylpent-4-en-1-one *O*-(3,5-bis(trifluoromethyl)benzoyl) oxime **1a-3** (0.3 mmol, 124.6 mg), ethynyltriisopropylsilane (0.6 mmol, 109.4 mg) and acetonitrile (3.0 mL) were stirred at 50 °C for 24 h. Then the reaction mixture was quenched with water and extracted with ethyl acetate, washed with water and brine, and dried over anhydrous Na<sub>2</sub>SO<sub>4</sub>. Purification of the crude product by column chromatography on silica gel (eluent: petroleum ether: ethyl acetate: dichloromethane = 15:1:3) afforded the title product in 69% yield (70.5 mg) as a yellow oil. <sup>1</sup>H NMR (400 MHz, CDCl<sub>3</sub>): δ 0.93-1.05 (m, 21H), 1.92-2.01 (m, 1H), 2.21-2.30 (m, 1H), 2.61 (dd, *J* = 7.6, 16.8 Hz, 1H), 2.82 (dd, *J* = 4.4, 16.8 Hz, 1H), 2.87-2.96 (m, 1H), 3.05-3.14 (m, 1H), 4.39-4.44 (m, 1H), 7.36-7.42 (m, 3H), 7.81-7.84 (m, 2H). <sup>13</sup>C NMR (100 MHz, CDCl<sub>3</sub>): δ 11.17, 18.50, 27.07, 27.36, 35.43, 71.64, 81.68, 105.85, 127.73, 128.25, 130.36, 134.40, 173.12. IR (neat): 3080, 3060, 3028, 2942, 2894, 2864, 2172, 1617, 1576, 1494, 1462, 1383, 1341, 1310, 1252, 1210, 1176, 1074, 1058, 1017, 995, 971, 919, 883, 840, 760, 692, 676, 662, 632, 558, 460, 437, 411 cm<sup>-1</sup>. HRMS (ESI) calcd. for C<sub>22</sub>H<sub>34</sub>NSi [M+H]<sup>+</sup>:

340.2455, found 340.2455.

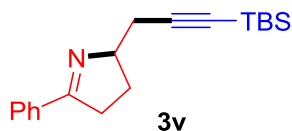

**2-(3-(*tert*-Butyldimethylsilyl)prop-2-yn-1-yl)-5-phenyl-3,4-dihydro-2H-pyrrole (3v).**

0.3 mmol scale, NiI<sub>2</sub> (0.015 mmol, 4.7 mg), **L1** (0.018 mmol, 7.2 mg), anhydrous K<sub>3</sub>PO<sub>4</sub> (0.6 mmol, 127.4 mg), 1-phenylpent-4-en-1-one *O*-(3,5-bis(trifluoromethyl)benzoyl) oxime **1a-3** (0.3 mmol, 124.6 mg), *tert*-butyl(ethynyl)dimethylsilane (0.6 mmol, 84.2 mg) and acetonitrile (3.0 mL) were stirred at 50 °C for 24 h. Then the reaction mixture was quenched with water and extracted with ethyl acetate, washed with water and brine, and dried over anhydrous Na<sub>2</sub>SO<sub>4</sub>. Purification of the crude product by column chromatography on silica gel (eluent: petroleum ether: ethyl acetate: dichloromethane = 15:1:3) afforded the title product in 60% yield (53.3 mg) as a yellow oil. <sup>1</sup>H NMR (400 MHz, CDCl<sub>3</sub>): δ 0.03 (s, 6H), 0.86 (s, 9H), 1.89-1.98 (m, 1H), 2.21-2.30 (m, 1H), 2.56 (dd, *J* = 7.6, 16.8 Hz, 1H), 2.80 (dd, *J* = 4.0, 16.8 Hz, 1H), 2.87-2.96 (m, 1H), 3.04-3.13 (m, 1H), 4.38-4.44 (m, 1H), 7.36-7.44 (m, 3H), 7.81-7.85 (m, 2H). <sup>13</sup>C NMR (100 MHz, CDCl<sub>3</sub>): δ -4.61, 16.39, 25.94, 27.08, 27.46, 35.40, 71.53, 83.98, 104.89, 127.73, 128.29, 130.41, 134.37, 173.21. IR (neat): 3068, 3024, 2952, 2927, 2886, 2855, 2172, 1611, 1575, 1494, 1461, 1448, 1360, 1345, 1250, 1210, 1182, 1077, 1054, 1018, 989, 941, 837, 824, 810, 775, 760, 695, 679, 600, 564, 550, 505, 457, 432, 409 cm<sup>-1</sup>. HRMS (ESI) calcd. for C<sub>19</sub>H<sub>28</sub>NSi [M+H]<sup>+</sup>: 298.1986, found 298.1986.

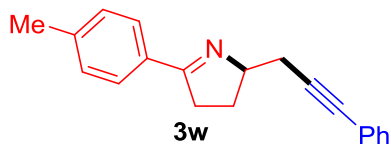

**2-(3-Phenylprop-2-yn-1-yl)-5-(*p*-tolyl)-3,4-dihydro-2H-pyrrole (3w).** 0.3 mmol scale, NiI<sub>2</sub> (0.015 mmol, 4.7 mg), **L1** (0.018 mmol, 7.2 mg), anhydrous K<sub>3</sub>PO<sub>4</sub> (0.6 mmol, 127.4 mg), 1-(*p*-tolyl)pent-4-en-1-one *O*-(3,5-bis(trifluoromethyl)benzoyl) oxime **1b** (0.3 mmol, 128.8 mg), phenylacetylene (0.6 mmol, 61.3 mg) and acetonitrile (3.0 mL) were stirred at

50 °C for 24 h. Then the reaction mixture was quenched with water and extracted with ethyl acetate, washed with water and brine, and dried over anhydrous Na<sub>2</sub>SO<sub>4</sub>. Purification of the crude product by column chromatography on silica gel (eluent: petroleum ether: ethyl acetate: dichloromethane = 15:1:3) afforded the title product in 72% yield (59.4 mg) as a yellow solid. <sup>1</sup>H NMR (400 MHz, CDCl<sub>3</sub>): δ 1.91-2.00 (m, 1H), 2.45-2.34 (m, 1H), 2.37 (s, 3H), 2.67 (dd, *J* = 8.0, 16.6 Hz, 1H), 2.86-3.01 (m, 2H), 3.04-3.13 (m, 1H), 4.45-4.48 (m, 1H), 7.20 (d, *J* = 8.0 Hz, 2H), 7.23-7.24 (m, 3H), 7.33-7.36 (m, 2H), 7.75 (d, *J* = 8.0 Hz, 2H). <sup>13</sup>C NMR (100 MHz, CDCl<sub>3</sub>): δ 21.38, 26.67, 27.74, 35.25, 71.59, 81.58, 87.49, 123.77, 127.52, 127.70, 128.08, 129.06, 131.53, 131.65, 140.68, 173.23. IR (neat): 3058, 3030, 2965, 2919, 2894, 2863, 2221, 2161, 1741, 1613, 1567, 1512, 1489, 1454, 1442, 1430, 1401, 1329, 1266, 1248, 1215, 1180, 1111, 1072, 1054, 1027, 1017, 982, 949, 919, 862, 850, 820, 804, 750, 717, 692, 668, 597, 557, 535, 527, 513, 488, 475, 451, 432, 416, 408 cm<sup>-1</sup>. HRMS (ESI) calcd. for C<sub>20</sub>H<sub>20</sub>N [M+H]<sup>+</sup>: 274.1590, found 274.1590.

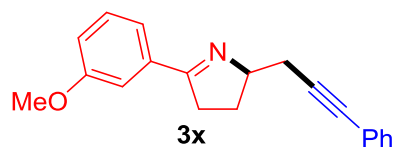

**5-(3-Methoxyphenyl)-2-(3-phenylprop-2-yn-1-yl)-3,4-dihydro-2H-pyrrole (3x).** 0.3 mmol scale, NiI<sub>2</sub> (0.015 mmol, 4.7 mg), **L1** (0.018 mmol, 7.2 mg), anhydrous K<sub>3</sub>PO<sub>4</sub> (0.6 mmol, 127.4 mg), 1-(3-methoxyphenyl)pent-4-en-1-one *O*-(3,5-bis(trifluoromethyl)benzoyl) oxime **1c** (0.3 mmol, 133.6 mg), phenylacetylene (0.6 mmol, 61.3 mg) and acetonitrile (3.0 mL) were stirred at 50 °C for 24 h. Then the reaction mixture was quenched with water and extracted with ethyl acetate, washed with water and brine, and dried over anhydrous Na<sub>2</sub>SO<sub>4</sub>. Purification of the crude product by column chromatography on silica gel (eluent: petroleum ether: ethyl acetate: dichloromethane = 15:1:3) afforded the title product in 68% yield (58.6 mg) as a yellow solid. <sup>1</sup>H NMR (400 MHz, CDCl<sub>3</sub>): δ 1.92-2.01 (m, 1H), 2.25-2.35 (m, 1H), 2.69 (dd, *J* = 7.6, 16.8 Hz, 1H), 2.87-3.01 (m, 2H), 3.05-3.14 (m, 1H), 3.84 (s, 3H), 4.47-4.51 (m, 1H), 6.98 (dd, *J* = 2.4, 8.0 Hz, 1H), 7.23-7.25 (m, 3H), 7.30 (t, *J* = 8.0 Hz, 1H), 7.34-7.39 (m, 3H), 7.45 (d, *J* = 2.0 Hz, 1H). <sup>13</sup>C NMR (100 MHz, CDCl<sub>3</sub>): δ 26.63, 27.73, 35.43, 55.30, 71.68, 81.64, 87.39, 112.09, 116.92, 120.47, 123.73, 127.56,

128.10, 129.32, 131.52, 135.77, 159.58, 173.29. IR (neat): 3080, 3034, 2965, 2926, 2863, 2831, 2173, 1613, 1598, 1583, 1488, 1462, 1441, 1428, 1332, 1267, 1219, 1196, 1170, 1163, 1095, 1081, 1062, 1031, 1009, 994, 917, 865, 844, 815, 785, 756, 689, 619, 568, 523, 499, 475, 434, 406  $\text{cm}^{-1}$ . HRMS (ESI) calcd. for  $\text{C}_{20}\text{H}_{20}\text{NO}$   $[\text{M}+\text{H}]^+$ : 290.1539, found 290.1532.

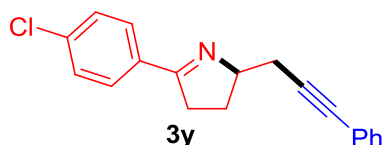

**5-(4-Chlorophenyl)-2-(3-phenylprop-2-yn-1-yl)-3,4-dihydro-2H-pyrrole (3y).** 0.3 mmol scale,  $\text{NiI}_2$  (0.015 mmol, 4.7 mg), **L1** (0.018 mmol, 7.2 mg), anhydrous  $\text{K}_3\text{PO}_4$  (0.6 mmol, 127.4 mg), 1-(4-chlorophenyl)pent-4-en-1-one *O*-(3,5-bis(trifluoromethyl)benzoyl) oxime **1d** (0.3 mmol, 134.9 mg), phenylacetylene (0.6 mmol, 61.3 mg) and acetonitrile (3.0 mL) were stirred at 50  $^\circ\text{C}$  for 24 h. Then the reaction mixture was quenched with water and extracted with ethyl acetate, washed with water and brine, and dried over anhydrous  $\text{Na}_2\text{SO}_4$ . Purification of the crude product by column chromatography on silica gel (eluent: petroleum ether: ethyl acetate: dichloromethane = 20:1:3 to 15:1:3, gradient) afforded the title product in 64% yield (56.1 mg) as a yellow solid.  $^1\text{H}$  NMR (400 MHz,  $\text{CDCl}_3$ ):  $\delta$  1.93-2.02 (m, 1H), 2.26-2.35 (m, 1H), 2.70 (dd,  $J = 7.6, 16.6$  Hz, 1H), 2.85-2.99 (m, 2H), 3.03-3.11 (m, 1H), 4.46-4.51 (m, 1H), 7.22-7.28 (m, 3H), 7.32-7.35 (m, 2H), 7.36-7.39 (m, 2H), 7.77-7.80 (m, 2H).  $^{13}\text{C}$  NMR (100 MHz,  $\text{CDCl}_3$ ):  $\delta$  26.61, 27.78, 35.33, 71.78, 81.72, 87.21, 123.68, 127.62, 128.13, 128.61, 129.06, 131.52, 132.84, 136.52, 172.24. IR (neat): 3080, 3056, 3032, 2968, 2928, 2866, 2335, 2163, 1608, 1594, 1565, 1488, 1442, 1432, 1400, 1332, 1265, 1245, 1176, 1156, 1101, 1089, 1068, 1056, 1028, 1010, 973, 913, 837, 828, 806, 754, 734, 690, 668, 631, 562, 537, 527, 494, 453, 432, 416, 407  $\text{cm}^{-1}$ . HRMS (ESI) calcd. for  $\text{C}_{19}\text{H}_{17}\text{ClN}$   $[\text{M}+\text{H}]^+$ : 294.1044, found 294.1045.

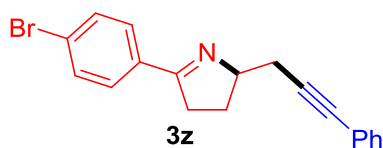

**5-(4-Bromophenyl)-2-(3-phenylprop-2-yn-1-yl)-3,4-dihydro-2H-pyrrole (3z).** 0.3 mmol scale, NiI<sub>2</sub> (0.015 mmol, 4.7 mg), **L1** (0.018 mmol, 7.2 mg), anhydrous K<sub>3</sub>PO<sub>4</sub> (0.6 mmol, 127.4 mg), 1-(4-bromophenyl)pent-4-en-1-one *O*-(3,5-bis(trifluoromethyl)benzoyl) oxime **1e** (0.3 mmol, 148.3 mg), phenylacetylene (0.6 mmol, 61.3 mg) and acetonitrile (3.0 mL) were stirred at 50 °C for 24 h. Then the reaction mixture was quenched with water and extracted with ethyl acetate, washed with water and brine, and dried over anhydrous Na<sub>2</sub>SO<sub>4</sub>. Purification of the crude product by column chromatography on silica gel (eluent: petroleum ether: ethyl acetate: dichloromethane = 20:1:3 to 15:1:3, gradient) afforded the title product in 63% yield (63.9 mg) as a light-yellow solid. <sup>1</sup>H NMR (400 MHz, CDCl<sub>3</sub>): δ 1.95-2.02 (m, 1H), 2.27-2.36 (m, 1H), 2.71 (dd, *J* = 7.2, 16.8 Hz, 1H), 2.86-2.99 (m, 2H), 3.03-3.11 (m, 1H), 4.48 (br, 1H), 7.24-7.25 (m, 3H), 7.33 (br, 2H), 7.53 (d, *J* = 8.4 Hz, 2H), 7.72 (d, *J* = 8.4 Hz, 2H). <sup>13</sup>C NMR (100 MHz, CDCl<sub>3</sub>): δ 26.59, 27.77, 35.30, 71.81, 81.75, 87.18, 123.68, 125.00, 127.63, 128.14, 129.30, 131.53, 131.59, 133.27, 172.36. IR (neat): 3080, 3054, 3030, 2967, 2928, 2866, 2205, 2177, 1608, 1588, 1562, 1483, 1442, 1433, 1396, 1331, 1265, 1243, 1174, 1152, 1099, 1068, 1056, 1027, 1007, 914, 827, 806, 754, 726, 708, 690, 560, 535, 523, 516, 491, 450, 430, 406 cm<sup>-1</sup>. HRMS (ESI) calcd. for C<sub>19</sub>H<sub>17</sub>BrN [M+H]<sup>+</sup>: 338.0539, found 338.0538.

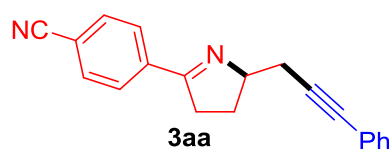

**4-(2-(3-Phenylprop-2-yn-1-yl)-3,4-dihydro-2H-pyrrol-5-yl)benzonitrile (3aa).** 0.3 mmol scale, Ni(cod)<sub>2</sub> (0.03 mmol, 8.3 mg), **L1** (0.036 mmol, 14.5 mg), anhydrous K<sub>3</sub>PO<sub>4</sub> (0.6 mmol, 127.4 mg), 4-(1-(((3,5-bis(trifluoromethyl)benzoyl)oxy)imino)pent-4-en-1-yl)benzonitrile **1f** (0.3 mmol, 132.1 mg), phenylacetylene (0.6 mmol, 61.3 mg) and acetonitrile (3.0 mL) were stirred at 50 °C for 24 h. Then the reaction mixture was quenched with water and extracted with ethyl acetate, washed with water and brine, and dried over anhydrous Na<sub>2</sub>SO<sub>4</sub>. Purification of the crude product by column chromatography on silica gel (eluent: petroleum ether: ethyl acetate = 10:1 to 5:1, gradient) afforded the title product in 52% yield (44.7 mg) as a yellow solid. <sup>1</sup>H NMR (400 MHz, CDCl<sub>3</sub>): δ 1.98-2.07 (m,

1H), 2.31-2.40 (m, 1H), 2.76 (dd,  $J = 7.2, 16.8$  Hz, 1H), 2.90-2.99 (m, 2H), 3.07-3.16 (m, 1H), 4.54 (br, 1H), 7.25-7.26 (m, 3H), 7.32-7.33 (m, 2H), 7.70 (d,  $J = 8.4$  Hz, 2H), 7.95 (d,  $J = 8.0$  Hz, 2H).  $^{13}\text{C}$  NMR (100 MHz,  $\text{CDCl}_3$ ):  $\delta$  26.51, 27.69, 35.42, 72.05, 81.90, 86.85, 113.84, 118.47, 123.57, 127.72, 128.17, 128.29, 131.51, 132.20, 138.32, 171.89. IR (neat): 3210, 3028, 2971, 2904, 2866, 2835, 2227, 1612, 1556, 1504, 1488, 1454, 1443, 1429, 1403, 1329, 1290, 1266, 1214, 1174, 1108, 1070, 1056, 1026, 1017, 963, 916, 848, 805, 755, 692, 668, 572, 527, 499, 482, 424, 416, 407  $\text{cm}^{-1}$ . HRMS (ESI) calcd. for  $\text{C}_{20}\text{H}_{17}\text{N}_2$   $[\text{M}+\text{H}]^+$ : 285.1386, found 285.1387.

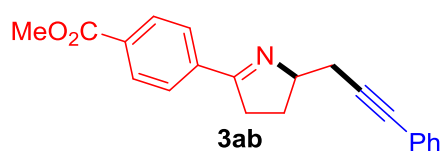

**Methyl 4-(2-(3-phenylprop-2-yn-1-yl)-3,4-dihydro-2H-pyrrol-5-yl)benzoate (3ab).** 0.3 mmol scale,  $\text{NiI}_2$  (0.015 mmol, 4.7 mg), **L1** (0.018 mmol, 7.2 mg), anhydrous  $\text{K}_3\text{PO}_4$  (0.6 mmol, 127.4 mg), methyl 4-(1-(((3,5-bis(trifluoromethyl)benzoyl)oxy)imino)pent-4-en-1-yl)benzoate **1g** (0.3 mmol, 142.0 mg), phenylacetylene (0.6 mmol, 61.3 mg) and acetonitrile (3.0 mL) were stirred at 50  $^\circ\text{C}$  for 24 h. Then the reaction mixture was quenched with water and extracted with ethyl acetate, washed with water and brine, and dried over anhydrous  $\text{Na}_2\text{SO}_4$ . Purification of the crude product by column chromatography on silica gel (eluent: petroleum ether: ethyl acetate: dichloromethane = 15:1:3) afforded the title product in 72% yield (68.5 mg) as a light-yellow solid.  $^1\text{H}$  NMR (400 MHz,  $\text{CDCl}_3$ ):  $\delta$  1.95-2.04 (m, 1H), 2.29-2.38 (m, 1H), 2.73 (dd,  $J = 7.6, 16.8$  Hz, 1H), 2.91-3.01 (m, 2H), 3.08-3.17 (m, 1H), 3.93 (s, 3H), 4.51-4.53 (m, 1H), 7.23-7.26 (m, 3H), 7.32-7.35 (m, 2H), 7.92 (d,  $J = 8.4$  Hz, 2H), 8.07 (d,  $J = 8.4$  Hz, 2H).  $^{13}\text{C}$  NMR (100 MHz,  $\text{CDCl}_3$ ):  $\delta$  26.56, 27.72, 35.48, 52.17, 71.94, 81.77, 87.09, 123.64, 127.62, 127.68, 128.12, 129.61, 131.50, 131.63, 138.34, 166.58, 172.66. IR (neat): 3032, 2995, 2942, 2920, 2843, 2205, 1713, 1610, 1504, 1490, 1434, 1409, 1313, 1272, 1193, 1178, 1111, 1103, 1056, 1016, 963, 917, 868, 819, 773, 763, 703, 694, 635, 561, 528, 509, 481, 432, 412  $\text{cm}^{-1}$ . HRMS (ESI) calcd. for  $\text{C}_{21}\text{H}_{20}\text{NO}_2$   $[\text{M}+\text{H}]^+$ : 318.1489, found 318.1482.

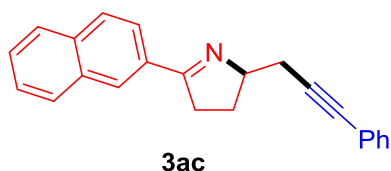

**5-(Naphthalen-2-yl)-2-(3-phenylprop-2-yn-1-yl)-3,4-dihydro-2H-pyrrole (3ac).** 0.3 mmol scale, NiI<sub>2</sub> (0.015 mmol, 4.7 mg), **L1** (0.018 mmol, 7.2 mg), anhydrous K<sub>3</sub>PO<sub>4</sub> (0.6 mmol, 127.4 mg), 1-(naphthalen-2-yl)pent-4-en-1-one *O*-(3,5-bis(trifluoromethyl)benzoyl) oxime **1h** (0.3 mmol, 139.6 mg), phenylacetylene (0.6 mmol, 61.3 mg) and acetonitrile (3.0 mL) were stirred at 50 °C for 24 h. Then the reaction mixture was quenched with water and extracted with ethyl acetate, washed with water and brine, and dried over anhydrous Na<sub>2</sub>SO<sub>4</sub>. Purification of the crude product by column chromatography on silica gel (eluent: petroleum ether: ethyl acetate: dichloromethane = 20:1:10) afforded the title product in 76% yield (70.1 mg) as a yellow solid. <sup>1</sup>H NMR (400 MHz, CDCl<sub>3</sub>): δ 1.96-2.05 (m, 1H), 2.29-2.38 (m, 1H), 2.74 (dd, *J* = 7.6, 16.8 Hz, 1H), 2.98-3.06 (m, 2H), 3.17-3.26 (m, 1H), 4.52-4.55 (m, 1H), 7.22 (t, *J* = 3.2 Hz, 3H), 7.34-7.36 (m, 2H), 7.46-7.52 (m, 2H), 7.81-7.88 (m, 3H), 8.10 (dd, *J* = 1.6, 8.8 Hz, 1H), 8.17 (s, 1H). <sup>13</sup>C NMR (100 MHz, CDCl<sub>3</sub>): δ 26.70, 27.81, 35.30, 71.81, 81.69, 87.42, 123.73, 124.61, 126.30, 127.03, 127.55, 127.68, 128.05, 128.09, 128.27, 128.65, 131.53, 131.85, 132.89, 134.37, 173.31. IR (neat): 3058, 3028, 2963, 2898, 2205, 2150, 1612, 1594, 1571, 1489, 1470, 1443, 1428, 1385, 1349, 1322, 1267, 1188, 1160, 1127, 1071, 1051, 1018, 994, 948, 919, 898, 862, 827, 802, 758, 742, 695, 663, 586, 535, 474, 444, 409 cm<sup>-1</sup>. HRMS (ESI) calcd. for C<sub>23</sub>H<sub>20</sub>N [M+H]<sup>+</sup>: 310.1590, found 310.1592.

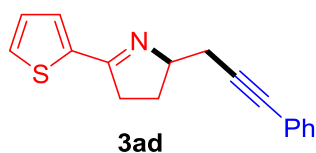

**2-(3-Phenylprop-2-yn-1-yl)-5-(thiophen-2-yl)-3,4-dihydro-2H-pyrrole (3ad).** 0.3 mmol scale, NiI<sub>2</sub> (0.015 mmol, 4.7 mg), **L1** (0.018 mmol, 7.2 mg), anhydrous K<sub>3</sub>PO<sub>4</sub> (0.6 mmol, 127.4 mg), 1-(thiophen-2-yl)pent-4-en-1-one *O*-(3,5-bis(trifluoromethyl)benzoyl) oxime **1i** (0.3 mmol, 126.4 mg), phenylacetylene (0.6 mmol, 61.3 mg) and acetonitrile (3.0 mL) were stirred at 50 °C for 24 h. Then the reaction mixture was quenched with water and

extracted with ethyl acetate, washed with water and brine, and dried over anhydrous Na<sub>2</sub>SO<sub>4</sub>. Purification of the crude product by column chromatography on silica gel (eluent: petroleum ether: acetone = 20:1) afforded the title product in 57% yield (45.1 mg) as a yellow oil. <sup>1</sup>H NMR (400 MHz, CDCl<sub>3</sub>): δ 1.95-2.04 (m, 1H), 2.27-2.36 (m, 1H), 2.66 (dd, *J* = 8.0, 16.8 Hz, 1H), 2.88-3.01 (m, 2H), 3.06-3.14 (m, 1H), 4.43-4.49 (m, 1H), 7.06 (dd, *J* = 3.6, 5.0 Hz, 1H), 7.23-7.25 (m, 3H), 7.34-7.37 (m, 3H), 7.42 (dd, *J* = 0.8, 5.2 Hz, 1H). <sup>13</sup>C NMR (100 MHz, CDCl<sub>3</sub>): δ 26.55, 28.04, 35.94, 71.56, 81.68, 87.32, 123.73, 127.41, 127.58, 128.12, 129.24, 129.47, 131.54, 139.15, 167.83. IR (neat): 3074, 2967, 2916, 2264, 2053, 2017, 1606, 1524, 1487, 1433, 1328, 1265, 1230, 1071, 1053, 1009, 973, 926, 851, 839, 819, 767, 711, 697, 662, 637, 586, 535, 508, 485, 446, 439, 430, 412 cm<sup>-1</sup>. HRMS (ESI) calcd. for C<sub>17</sub>H<sub>16</sub>NS [M+H]<sup>+</sup>: 266.0998, found 266.0999.

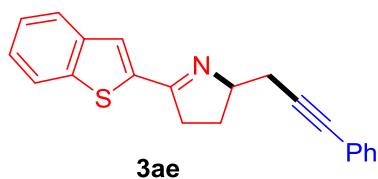

**5-(Benzo[*b*]thiophen-2-yl)-2-(3-phenylprop-2-yn-1-yl)-3,4-dihydro-2H-pyrrole (3ae).**

0.3 mmol scale, NiI<sub>2</sub> (0.015 mmol, 4.7 mg), L1 (0.018 mmol, 7.2 mg), anhydrous K<sub>3</sub>PO<sub>4</sub> (0.6 mmol, 127.4 mg), 1-(benzo[*b*]thiophen-2-yl)pent-4-en-1-one *O*-(3,5-bis(trifluoromethyl)benzoyl) oxime **1j** (0.3 mmol, 141.4 mg), phenylacetylene (0.6 mmol, 61.3 mg) and acetonitrile (3.0 mL) were stirred at 50 °C for 24 h. Then the reaction mixture was quenched with water and extracted with ethyl acetate, washed with water and brine, and dried over anhydrous Na<sub>2</sub>SO<sub>4</sub>. Purification of the crude product by column chromatography on silica gel (eluent: petroleum ether: ethyl acetate: dichloromethane = 15:1:3) afforded the title product in 56% yield (53.0 mg) as a yellow solid. <sup>1</sup>H NMR (400 MHz, CDCl<sub>3</sub>): δ 1.98-2.07 (m, 1H), 2.30-2.39 (m, 1H), 2.70 (dd, *J* = 8.0, 16.6 Hz, 1H), 2.94-3.04 (m, 2H), 3.12-3.20 (m, 1H), 4.49-4.52 (m, 1H), 7.22-7.24 (m, 3H), 7.32-7.38 (m, 4H), 7.53 (s, 1H), 7.76-7.79 (m, 1H), 7.81-7.83 (m, 1H). <sup>13</sup>C NMR (100 MHz, CDCl<sub>3</sub>): δ 26.48, 28.08, 35.72, 71.81, 81.75, 87.16, 122.56, 123.67, 124.40, 124.45, 125.88, 126.61, 127.59, 128.12, 131.53, 139.20, 139.45, 141.01, 168.50. IR (neat): 3072, 3056, 3013, 2959,



2920, 2863, 2205, 1604, 1522, 1489, 1428, 1338, 1325, 1267, 1241, 1198, 1177, 1154, 1050, 1013, 973, 942, 912, 862, 838, 797, 754, 746, 729, 689, 648, 592, 575, 534, 508, 453, 425, 410  $\text{cm}^{-1}$ . HRMS (ESI) calcd. for  $\text{C}_{21}\text{H}_{18}\text{NS}$   $[\text{M}+\text{H}]^+$ : 316.1154, found 316.1154.

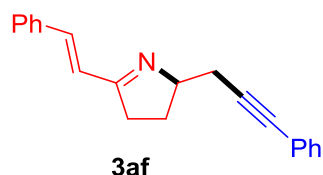

**(E)-2-(3-Phenylprop-2-yn-1-yl)-5-styryl-3,4-dihydro-2H-pyrrole (3af).** 0.3 mmol scale,  $\text{Ni}(\text{cod})_2$  (0.03 mmol, 8.3 mg), **L1** (0.036 mmol, 14.5 mg), anhydrous  $\text{K}_3\text{PO}_4$  (0.6 mmol, 127.4 mg), (1E)-1-phenylhepta-1,6-dien-3-one *O*-(3,5-bis(trifluoromethyl)benzoyl) oxime **1k** (0.3 mmol, 132.4 mg), phenylacetylene (0.6 mmol, 61.3 mg) and acetonitrile (3.0 mL) were stirred at 50 °C for 24 h. Then the reaction mixture was quenched with water and extracted with ethyl acetate, washed with water and brine, and dried over anhydrous  $\text{Na}_2\text{SO}_4$ . Purification of the crude product by column chromatography on silica gel (eluent: petroleum ether: ethyl acetate = 5:1) afforded the title product in 34% yield (28.8 mg) as a yellow oil.  $^1\text{H}$  NMR (400 MHz,  $\text{CDCl}_3$ ):  $\delta$  1.84-1.93 (m, 1H), 2.21-2.30 (m, 1H), 2.68 (dd,  $J = 7.6, 16.6$  Hz, 1H), 2.73-2.81 (m, 1H), 2.89-3.01 (m, 2H), 4.38-4.44 (m, 1H), 6.98 (d,  $J = 16.4$  Hz, 1H), 7.12 (d,  $J = 16.4$  Hz, 1H), 7.24-7.26 (m, 3H), 7.29-7.35 (m, 2H), 7.37-7.39 (m, 3H), 7.49 (d,  $J = 7.2$  Hz, 2H).  $^{13}\text{C}$  NMR (151 MHz,  $\text{CDCl}_3$ ):  $\delta$  26.63, 27.61, 34.03, 71.39, 81.72, 87.30, 123.78, 124.77, 127.25, 127.62, 128.15, 128.82, 129.09, 131.62, 135.86, 139.25, 173.98. IR (neat): 3078, 3056, 3026, 2928, 2859, 2244, 2219, 1954, 1883, 1814, 1686, 1633, 1588, 1490, 1450, 1442, 1429, 1348, 1278, 1264, 1239, 1177, 1136, 1071, 1048, 1015, 961, 912, 842, 749, 689, 586, 532, 506, 494, 468, 449, 412  $\text{cm}^{-1}$ . HRMS (ESI) calcd. for  $\text{C}_{21}\text{H}_{20}\text{N}$   $[\text{M}+\text{H}]^+$ : 286.1590, found 286.1593.

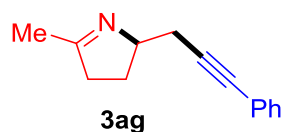

**5-Methyl-2-(3-phenylprop-2-yn-1-yl)-3,4-dihydro-2H-pyrrole (3ag).** 0.3 mmol scale,  $\text{NiI}_2$  (0.015 mmol, 4.7 mg), **L1** (0.018 mmol, 7.2 mg), anhydrous  $\text{K}_3\text{PO}_4$  (0.6 mmol, 127.4

mg), hex-5-en-2-one *O*-(3,5-bis(trifluoromethyl)benzoyl) oxime **1l** (0.3 mmol, 106.0 mg), phenylacetylene (0.6 mmol, 61.3 mg) and acetonitrile (3.0 mL) were stirred at 50 °C for 24 h. Then the reaction mixture was quenched with water and extracted with ethyl acetate, washed with water and brine, and dried over anhydrous Na<sub>2</sub>SO<sub>4</sub>. Purification of the crude product by column chromatography on silica gel (eluent: dichloromethane: methanol = 50:1) afforded the title product in 69% yield (40.6 mg) as a light-yellow oil. <sup>1</sup>H NMR (600 MHz, CDCl<sub>3</sub>): δ 1.77-1.83 (m, 1H), 2.06 (s, 3H), 2.13-2.19 (m, 1H), 2.46-2.52 (m, 1H), 2.58-2.65 (m, 2H), 2.83 (dd, *J* = 7.2, 16.8 Hz, 1H), 4.22-4.24 (m, 1H), 7.26-7.29 (m, 3H), 7.37-7.39 (m, 2H). <sup>13</sup>C NMR (151 MHz, CDCl<sub>3</sub>): δ 19.67, 26.56, 28.09, 39.21, 71.23, 81.47, 87.44, 123.82, 127.56, 128.12, 131.54, 175.48. IR (neat): 3076, 3054, 3036, 2947, 2917, 2233, 1647, 1598, 1571, 1490, 1455, 1445, 1429, 1378, 1345, 1316, 1278, 1227, 1208, 1172, 1138, 1070, 1039, 1004, 949, 914, 842, 755, 691, 668, 603, 527, 507, 424 cm<sup>-1</sup>. HRMS (ESI) calcd. for C<sub>14</sub>H<sub>16</sub>N [M+H]<sup>+</sup>: 198.1277, found 198.1278.

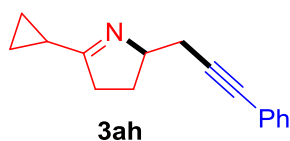

**5-Cyclopropyl-2-(3-phenylprop-2-yn-1-yl)-3,4-dihydro-2H-pyrrole (3ah).** 0.3 mmol scale, NiI<sub>2</sub> (0.015 mmol, 4.7 mg), **L1** (0.018 mmol, 7.2 mg), anhydrous K<sub>3</sub>PO<sub>4</sub> (0.6 mmol, 127.4 mg), 1-cyclopropylpent-4-en-1-one *O*-(3,5-bis(trifluoromethyl)benzoyl) oxime **1m** (0.3 mmol, 113.8 mg), phenylacetylene (0.6 mmol, 61.3 mg) and acetonitrile (3.0 mL) were stirred at 50 °C for 24 h. Then the reaction mixture was quenched with water and extracted with ethyl acetate, washed with water and brine, and dried over anhydrous Na<sub>2</sub>SO<sub>4</sub>. Purification of the crude product by column chromatography on silica gel (eluent: petroleum ether: ethyl acetate: dichloromethane = 15:1:3) afforded the title product in 63% yield (42.4 mg) as a light-yellow oil. <sup>1</sup>H NMR (600 MHz, CDCl<sub>3</sub>): δ 0.82-0.88 (m, 4H), 1.75-1.82 (m, 2H), 2.12-2.16 (m, 1H), 2.32-2.37 (m, 1H), 2.46-2.50 (m, 1H) 2.57 (dd, *J* = 7.2, 16.8 Hz, 1H), 2.82 (d, *J* = 16.8 Hz, 1H), 4.22 (br, 1H), 7.27 (br, 3H), 7.38-7.39 (m, 2H). <sup>13</sup>C NMR (151 MHz, CDCl<sub>3</sub>): δ 7.05, 7.48, 14.14, 26.62, 27.47, 34.82, 70.74, 81.46, 87.54, 123.86, 127.55, 128.13, 131.55, 180.02. IR (neat): 3080, 3056, 3005, 2909, 2837,

2237, 1699, 1631, 1598, 1569, 1490, 1454, 1442, 1427, 1402, 1377, 1348, 1315, 1267, 1198, 1098, 1070, 1053, 1026, 981, 913, 862, 818, 755, 721, 691, 668, 526, 513, 475, 418  $\text{cm}^{-1}$ . HRMS (ESI) calcd. for  $\text{C}_{16}\text{H}_{18}\text{N}$   $[\text{M}+\text{H}]^+$ : 224.1434, found 224.1438.

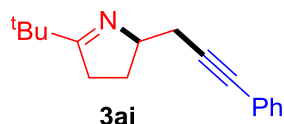

**5-(tert-Butyl)-2-(3-phenylprop-2-yn-1-yl)-3,4-dihydro-2H-pyrrole (3ai)**. 0.3 mmol scale,  $\text{NiI}_2$  (0.015 mmol, 4.7 mg), **L1** (0.018 mmol, 7.2 mg), anhydrous  $\text{K}_3\text{PO}_4$  (0.6 mmol, 127.4 mg), 2,2-dimethylhept-6-en-3-one *O*-(3,5-bis(trifluoromethyl)benzoyl) oxime **1n** (0.3 mmol, 118.6 mg), phenylacetylene (0.6 mmol, 61.3 mg) and acetonitrile (3.0 mL) were stirred at 50 °C for 24 h. Then the reaction mixture was quenched with water and extracted with ethyl acetate, washed with water and brine, and dried over anhydrous  $\text{Na}_2\text{SO}_4$ . Purification of the crude product by column chromatography on silica gel (eluent: petroleum ether: ethyl acetate: dichloromethane = 15:1:3) afforded the title product in 65% yield (46.4 mg) as a yellow oil.  $^1\text{H}$  NMR (600 MHz,  $\text{CDCl}_3$ ):  $\delta$  1.17 (s, 9H), 1.80-1.86 (m, 1H), 2.07-2.13 (m, 1H), 2.50-2.56 (m, 1H), 2.63 (dd,  $J = 7.2, 16.8$  Hz, 1H), 2.69-2.75 (m, 1H), 2.83 (dd,  $J = 4.2, 16.8$  Hz, 1H), 4.24-4.28 (m, 1H), 7.25-7.28 (m, 3H), 7.35-7.38 (m, 2H).  $^{13}\text{C}$  NMR (150 MHz,  $\text{CDCl}_3$ ):  $\delta$  26.45, 27.55, 28.23, 33.71, 35.71, 70.49, 81.34, 87.45, 123.86, 127.48, 128.10, 131.47, 185.34. IR (neat): 3080, 3050, 2967, 2924, 2900, 2867, 2833, 2339, 2246, 2161, 1893, 1808, 1627, 1598, 1572, 1490, 1475, 1457, 1442, 1427, 1389, 1363, 1339, 1318, 1263, 1223, 1206, 1160, 1109, 1072, 1016, 994, 973, 924, 767, 697, 668, 534, 522, 504, 477, 419  $\text{cm}^{-1}$ . HRMS (ESI) calcd. for  $\text{C}_{17}\text{H}_{22}\text{N}$   $[\text{M}+\text{H}]^+$ : 240.1747, found 240.1747.

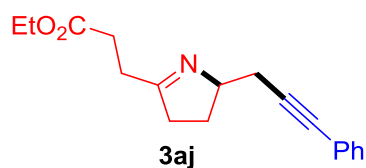

**Ethyl 3-(2-(3-phenylprop-2-yn-1-yl)-3,4-dihydro-2H-pyrrol-5-yl)propanoate (3aj)**. 0.3 mmol scale,  $\text{NiI}_2$  (0.015 mmol, 4.7 mg), **L1** (0.018 mmol, 7.2 mg), anhydrous  $\text{K}_3\text{PO}_4$  (0.6

mmol, 127.4 mg), ethyl 4-(((3,5-bis(trifluoromethyl)benzoyl)oxy)imino)oct-7-enoate **1o** (0.3 mmol, 131.8 mg), phenylacetylene (0.6 mmol, 61.3 mg) and acetonitrile (3.0 mL) were stirred at 50 °C for 24 h. Then the reaction mixture was quenched with water and extracted with dichloromethane, washed with water and brine, and dried over anhydrous Na<sub>2</sub>SO<sub>4</sub>. Purification of the crude product by column chromatography on silica gel (eluent: petroleum ether: ethyl acetate: dichloromethane = 2:1:5) afforded the title product in 70% yield (59.4 mg) as a yellow solid. <sup>1</sup>H NMR (600 MHz, CDCl<sub>3</sub>): δ 1.24 (t, *J* = 7.2 Hz, 3H), 1.79-1.85 (m, 1H), 2.11-2.17 (m, 1H), 2.47-2.58 (m, 2H), 2.61-2.65 (m, 3H), 2.66-2.69 (m, 2H), 2.82 (dd, *J* = 4.8, 16.8 Hz, 1H), 4.10-4.14 (m, 2H), 4.24 (br, 1H), 7.26-7.29 (m, 3H), 7.37-7.38 (m, 2H). <sup>13</sup>C NMR (151 MHz, CDCl<sub>3</sub>): δ 14.14, 26.46, 27.61, 28.39, 30.82, 38.06, 60.39, 71.00, 81.43, 87.35, 123.78, 127.56, 128.12, 131.53, 172.92, 176.83. IR (neat): 3443, 3398, 3080, 3054, 3030, 2979, 2924, 2866, 2849, 2827, 2231, 1982, 1899, 1733, 1690, 1640, 1596, 1571, 1493, 1478, 1431, 1417, 1391, 1369, 1328, 1269, 1241, 1208, 1190, 1177, 1167, 1144, 1113, 1087, 1074, 1055, 1025, 972, 948, 922, 868, 838, 810, 777, 754, 694, 669, 614, 580, 531, 510, 478, 425 cm<sup>-1</sup>. HRMS (ESI) calcd. for C<sub>18</sub>H<sub>22</sub>NO<sub>2</sub> [M+H]<sup>+</sup>: 284.1645, found 284.1646.

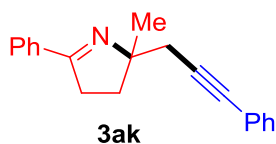

**2-Methyl-5-phenyl-2-(3-phenylprop-2-yn-1-yl)-3,4-dihydro-2H-pyrrole (3ak).** 0.3 mmol scale, NiI<sub>2</sub> (0.015 mmol, 4.7 mg), **L1** (0.018 mmol, 7.2 mg), anhydrous K<sub>3</sub>PO<sub>4</sub> (0.6 mmol, 127.4 mg), 4-methyl-1-phenylpent-4-en-1-one *O*-(3,5-bis(trifluoromethyl)benzoyl) oxime **1p** (0.3 mmol, 128.8 mg), phenylacetylene (0.6 mmol, 61.3 mg) and acetonitrile (3.0 mL) were stirred at 50 °C for 24 h. Then the reaction mixture was quenched with water and extracted with ethyl acetate, washed with water and brine, and dried over anhydrous Na<sub>2</sub>SO<sub>4</sub>. Purification of the crude product by column chromatography on silica gel (eluent: petroleum ether: ethyl acetate: dichloromethane = 20:1:3) afforded the title product in 65% yield (53.1 mg) as a yellow solid. <sup>1</sup>H NMR (400 MHz, CDCl<sub>3</sub>): δ 1.48 (s, 3H), 1.86-1.93 (m, 1H), 2.23-2.30 (m, 1H), 2.68 (d, *J* = 16.4 Hz, 1H), 2.80 (d, *J* = 16.4 Hz,

1H), 3.01-3.15 (m, 2H), 7.23-7.25 (m, 3H), 7.32-7.34 (m, 2H), 7.37-7.44 (m, 3H), 7.83-7.85 (m, 2H). <sup>13</sup>C NMR (100 MHz, CDCl<sub>3</sub>): δ 27.21, 32.73, 33.71, 35.70, 76.10, 81.76, 87.58, 123.84, 127.55, 127.74, 128.13, 128.35, 130.38, 131.53, 134.62, 171.26. IR (neat): 3074, 3060, 3026, 2963, 2933, 2899, 2866, 2215, 1950, 1611, 1573, 1489, 1455, 1443, 1371, 1340, 1314, 1257, 1220, 1158, 1136, 1116, 1090, 1070, 1019, 1002, 913, 858, 827, 771, 755, 689, 670, 634, 562, 547, 526, 512, 445, 414 cm<sup>-1</sup>. HRMS (ESI) calcd. for C<sub>20</sub>H<sub>20</sub>N [M+H]<sup>+</sup>: 274.1590, found 274.1589.

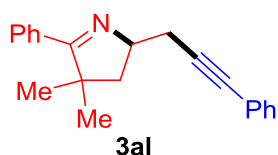

**4,4-Dimethyl-5-phenyl-2-(3-phenylprop-2-yn-1-yl)-3,4-dihydro-2H-pyrrole (3al).** 0.3 mmol scale, Ni(cod)<sub>2</sub> (0.03 mmol, 8.3 mg), **L1** (0.036 mmol, 14.5 mg), anhydrous K<sub>3</sub>PO<sub>4</sub> (0.6 mmol, 127.4 mg), 2,2-dimethyl-1-phenylpent-4-en-1-one *O*-(3,5-bis(trifluoromethyl)-benzoyl) oxime **1q** (0.3 mmol, 133.0 mg), phenylacetylene (0.6 mmol, 61.3 mg) and acetonitrile (3.0 mL) were stirred at 50 °C for 24 h. Then the reaction mixture was quenched with water and extracted with ethyl acetate, washed with water and brine, and dried over anhydrous Na<sub>2</sub>SO<sub>4</sub>. Purification of the crude product by column chromatography on silica gel (eluent: petroleum ether: ethyl acetate: dichloromethane = 15:1:6) afforded the title product in 56% yield (48.3 mg) as a yellow solid. <sup>1</sup>H NMR (400 MHz, CDCl<sub>3</sub>): δ 1.37 (s, 3H), 1.38 (s, 3H), 1.87 (dd, *J* = 8.4, 12.6 Hz, 1H), 2.21 (dd, *J* = 7.2, 12.6 Hz, 1H), 2.74 (dd, *J* = 8.0, 16.4 Hz, 1H), 3.03 (dd, *J* = 4.8, 16.6 Hz, 1H), 4.26-4.33 (m, 1H), 7.24-7.28 (m, 3H), 7.34-7.41 (m, 5H), 7.69-7.71 (m, 2H). <sup>13</sup>C NMR (100 MHz, CDCl<sub>3</sub>): δ 26.24, 26.72, 27.19, 46.91, 50.85, 66.75, 82.02, 87.44, 123.80, 127.57, 127.88, 128.12, 128.13, 129.43, 131.55, 134.71, 180.45. IR (neat): 3048, 2976, 2956, 2923, 2869, 2835, 2158, 1903, 1820, 1770, 1596, 1569, 1489, 1461, 1441, 1428, 1390, 1370, 1343, 1317, 1265, 1236, 1201, 1172, 1152, 1089, 1070, 1043, 1020, 979, 953, 927, 767, 714, 691, 621, 538, 529, 499, 479, 458, 416 cm<sup>-1</sup>. HRMS (ESI) calcd. for C<sub>21</sub>H<sub>22</sub>N [M+H]<sup>+</sup>: 288.1747, found 288.1746.

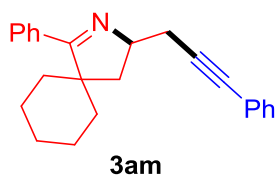

**1-Phenyl-3-(3-phenylprop-2-yn-1-yl)-2-azaspiro[4.5]dec-1-ene (3am).** 0.3 mmol scale, Ni(cod)<sub>2</sub> (0.03 mmol, 8.3 mg), **L1** (0.036 mmol, 14.5 mg), anhydrous K<sub>3</sub>PO<sub>4</sub> (0.6 mmol, 127.4 mg), (1-allylcyclohexyl)(phenyl)methanone *O*-(3,5-bis(trifluoromethyl)benzoyl) oxime **1r** (0.3 mmol, 145.0 mg), phenylacetylene (0.6 mmol, 61.3 mg) and acetonitrile (3.0 mL) were stirred at 50 °C for 24 h. Then the reaction mixture was quenched with water and extracted with ethyl acetate, washed with water and brine, and dried over anhydrous Na<sub>2</sub>SO<sub>4</sub>. Purification of the crude product by column chromatography on silica gel (eluent: petroleum ether: ethyl acetate = 25:1) afforded the title product in 43% yield (42.7 mg) as a yellow oil. <sup>1</sup>H NMR (600 MHz, CDCl<sub>3</sub>): δ 1.13-1.19 (m, 1H), 1.31-1.40 (m, 1H), 1.46-1.52 (m, 1H), 1.56-1.58 (m, 2H), 1.66-1.79 (m, 6H), 2.44-2.47 (m, 1H), 2.77 (dd, *J* = 7.8, 16.5 Hz, 1H), 3.01 (d, *J* = 16.2 Hz, 1H), 4.30-4.31 (m, 1H), 7.25-7.27 (m, 3H), 7.37 (br, 3H), 7.740-7.741 (m, 2H), 7.54-7.55 (m, 2H). <sup>13</sup>C NMR (151 MHz, CDCl<sub>3</sub>): δ 23.13, 23.29, 25.53, 27.01, 32.21, 35.60, 39.91, 56.90, 67.48, 82.07, 87.51, 123.84, 127.59, 127.98, 128.04, 128.15, 128.93, 131.58, 135.72, 181.46. IR (neat): 3078, 3050, 3022, 2926, 2854, 2335, 2221, 1810, 1599, 1570, 1490, 1442, 1348, 1293, 1263, 1247, 1204, 1156, 1069, 1029, 1002, 911, 843, 755, 691, 669, 603, 591, 526, 511, 441, 417 cm<sup>-1</sup>. HRMS (ESI) calcd. for C<sub>24</sub>H<sub>26</sub>N [M+H]<sup>+</sup>: 328.2060, found 328.2063.

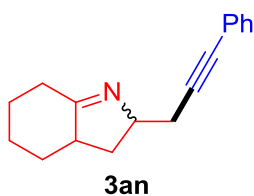

**2-(3-Phenylprop-2-yn-1-yl)-3,3a,4,5,6,7-hexahydro-2H-indole (3an).** 0.3 mmol scale, Ni(cod)<sub>2</sub> (0.03 mmol, 8.3 mg), **L1** (0.036 mmol, 14.5 mg), anhydrous K<sub>3</sub>PO<sub>4</sub> (0.6 mmol, 127.4 mg), 2-allylcyclohexan-1-one *O*-(3,5-bis(trifluoromethyl)benzoyl) oxime **1s** (0.3 mmol, 118.0 mg), phenylacetylene (0.6 mmol, 61.3 mg) and acetonitrile (3.0 mL) were stirred at 50 °C for 24 h. Then the reaction mixture was quenched with water and extracted

with ethyl acetate, washed with water and brine, and dried over anhydrous Na<sub>2</sub>SO<sub>4</sub>. Purification of the crude product by column chromatography on silica gel (eluent: petroleum ether: acetone: dichloromethane = 5:1:10) afforded a mixture of diastereoisomers (d.r. 3:2) in 67% yield (47.5 mg) as a yellow oil. <sup>1</sup>H NMR (400 MHz, CDCl<sub>3</sub>): δ 1.07-1.25 (m, 1H), 1.30-1.35 (m, 0.6H, major), 1.37-1.51 (m, 2H), 1.65-1.73 (m, 0.4H, minor), 1.75-1.81 (m, 1H), 1.98-2.00 (m, 1H), 2.10-2.21 (m, 2H), 2.34-2.41 (m, 1H), 2.53 (dd, *J* = 7.2, 16.6 Hz, 0.4H, minor), 2.59-2.79 (m, 3H), 2.89 (dd, *J* = 7.2, 16.8 Hz, 0.6H, major), 4.10 (br, 0.6H, major), 4.30 (br, 0.4H, minor), 7.26-7.27 (m, 3H), 7.36-7.40 (m, 2H). <sup>13</sup>C NMR (100 MHz, CDCl<sub>3</sub>): δ 25.14 (major), 25.27 (minor), 26.53 (minor), 26.64 (major), 26.88 (minor), 27.07 (major), 31.68 (major), 31.79 (minor), 34.22 (minor), 34.73 (major), 34.92 (minor), 35.27 (major), 48.05 (minor), 48.77 (major), 69.34, 81.24 (minor), 81.84 (major), 87.54 (minor), 87.63 (major), 123.79 (minor), 123.84 (major), 127.49 (major), 127.53 (minor), 128.07 (major), 128.12 (minor), 131.47 (minor), 131.51 (major), 179.92 (major), 180.39 (minor) (*1 aliphatic carbon signal of the isomers is not observed due to signal overlap*). IR (neat): 3078, 3050, 2928, 2857, 2353, 2158, 1713, 1651, 1598, 1571, 1490, 1443, 1347, 1278, 1176, 1148, 1070, 1023, 965, 913, 805, 755, 691, 668, 526, 509, 412 cm<sup>-1</sup>. HRMS (ESI) calcd. for C<sub>17</sub>H<sub>20</sub>N [M+H]<sup>+</sup>: 238.1590, found 238.1592.

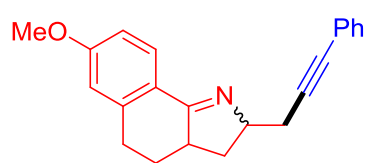

**3ao**

**7-Methoxy-2-(3-phenylprop-2-yn-1-yl)-3,3a,4,5-tetrahydro-2H-benzo[g]indole (3ao).**

0.3 mmol scale, NiI<sub>2</sub> (0.015 mmol, 4.7 mg), **L1** (0.018 mmol, 7.2 mg), anhydrous K<sub>3</sub>PO<sub>4</sub> (0.6 mmol, 127.4 mg), 2-allyl-6-methoxy-3,4-dihydronaphthalen-1(2H)-one *O*-(3,5-bis(trifluoromethyl)benzoyl) oxime **1t** (0.3 mmol, 141.4 mg), phenylacetylene (0.6 mmol, 61.3 mg) and acetonitrile (3.0 mL) were stirred at 50 °C for 24 h. Then the reaction mixture was quenched with water and extracted with ethyl acetate, washed with water and brine, and dried over anhydrous Na<sub>2</sub>SO<sub>4</sub>. Purification of the crude product by column

chromatography on silica gel (eluent: petroleum ether: ethyl acetate: acetone = 5:1) afforded a mixture of diastereoisomers (d.r. 7:3) in 72% yield (68.2 mg) as a yellow solid.  $^1\text{H}$  NMR (400 MHz,  $\text{CDCl}_3$ ):  $\delta$  1.41-1.49 (m, 0.7H, major), 1.54-1.70 (m, 1H), 1.77-1.85 (m, 0.3H, minor), 2.21-2.27 (m, 1H), 2.35-2.41 (m, 0.3H, minor), 2.46-2.57 (m, 1H), 2.70-2.77 (m, 1H), 2.81-2.96 (m, 2H), 2.97-3.03 (m, 0.7H, major), 3.13 (dd,  $J = 4.8, 16.8$  Hz, 1H), 3.80 (m, 3H), 4.15-4.18 (m, 0.7H, major), 4.51-4.56 (m, 0.3H, minor), 6.68 (br, 1H), 6.78-6.82 (m, 1H), 7.22-7.28 (m, 3H), 7.33-7.39 (m, 2H), 8.04-8.07 (m, 1H).  $^{13}\text{C}$  NMR (100 MHz,  $\text{CDCl}_3$ ):  $\delta$  25.34 (minor), 26.99 (major), 29.69 (major), 29.94 (minor), 30.21 (major), 30.41 (minor), 34.43 (minor), 36.70 (major), 45.80 (minor), 47.58 (major), 55.16, 69.58 (minor), 69.68 (major), 81.13 (minor), 81.87 (major), 87.70 (major), 88.00 (minor), 112.80 (major), 112.82 (minor), 112.93 (minor), 112.97 (major), 122.94 (major), 122.97 (minor), 123.72 (minor), 123.83 (major), 127.48 (major), 127.52 (minor), 127.74 (major), 127.83 (minor), 128.06 (major), 128.10 (minor), 131.45 (minor), 131.52 (major), 142.98 (major), 143.04 (minor), 161.53 (major), 161.55 (minor), 173.51 (major), 173.82 (minor) (*1 aliphatic carbon signal of the isomers is not observed due to signal overlap*). IR (neat): 3080, 3048, 3019, 2957, 2932, 2912, 2851, 2248, 2209, 1625, 1602, 1568, 1491, 1464, 1456, 1442, 1428, 1359, 1338, 1308, 1270, 1236, 1214, 1150, 1140, 1122, 1103, 1069, 1027, 968, 919, 872, 853, 824, 777, 754, 723, 694, 657, 616, 586, 568, 530, 497, 453, 441, 424  $\text{cm}^{-1}$ . HRMS (ESI) calcd. for  $\text{C}_{22}\text{H}_{22}\text{NO}$   $[\text{M}+\text{H}]^+$ : 316.1696, found 316.1696.

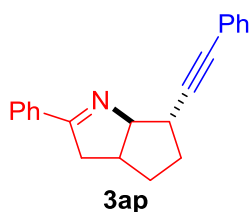

**2-Phenyl-6-(phenylethynyl)-3,3a,4,5,6,6a-hexahydrocyclopenta[b]pyrrole (3ap).** 0.3 mmol scale,  $\text{NiI}_2$  (0.015 mmol, 4.7 mg), **L1** (0.018 mmol, 7.2 mg), anhydrous  $\text{K}_3\text{PO}_4$  (0.6 mmol, 127.4 mg), 2-(cyclopent-2-en-1-yl)-1-phenylethan-1-one *O*-(3,5-bis(trifluoromethyl)benzoyl) oxime **1u** (0.3 mmol, 132.4 mg), phenylacetylene (0.6 mmol, 61.3 mg) and acetonitrile (3.0 mL) were stirred at 50 °C for 24 h. Then the reaction mixture was quenched with water and extracted with ethyl acetate, washed with water and brine, and



dried over anhydrous Na<sub>2</sub>SO<sub>4</sub>. Purification of the crude product by column chromatography on silica gel (eluent: petroleum ether: ethyl acetate: dichloromethane = 15:1:3) afforded the title product in 72% yield (61.6 mg) as a yellow oil. The relative stereochemistry of **3ap** was determined by 2D NOESY and 1D differential NOESY experiments. <sup>1</sup>H NMR (600 MHz, CDCl<sub>3</sub>): δ 1.40-1.45 (m, 1H), 1.76-1.80 (m, 2H), 2.20-2.26 (m, 1H), 2.78 (dt, *J* = 2.4, 18.0 Hz, 1H), 2.97-3.02 (m, 1H), 3.16-3.18 (m, 1H), 3.21-3.25 (m, 1H), 4.89-4.90 (m, 1H), 7.25-7.30 (m, 3H), 7.39-7.44 (m, 5H), 7.83-7.84 (m, 2H). <sup>13</sup>C NMR (100 MHz, CDCl<sub>3</sub>): δ 31.43, 33.49, 37.69, 38.65, 43.62, 81.46, 85.87, 92.52, 123.96, 127.52, 127.86, 128.13, 128.40, 130.54, 131.59, 134.23, 172.36. IR (neat): 3101, 3080, 3058, 3032, 2861, 2379, 2231, 1950, 1735, 1615, 1598, 1574, 1489, 1443, 1427, 1338, 1303, 1288, 1269, 1246, 1230, 1177, 1103, 1072, 1054, 1024, 915, 902, 887, 846, 813, 754, 689, 591, 554, 537, 525, 465, 439 cm<sup>-1</sup>. HRMS (ESI) calcd. for C<sub>21</sub>H<sub>20</sub>N [M+H]<sup>+</sup>: 286.1590, found 286.1589.

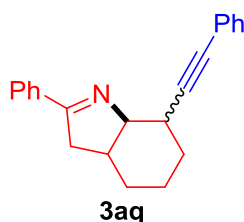

**2-Phenyl-7-(phenylethynyl)-3a,4,5,6,7,7a-hexahydro-3H-indole (3aq).** 0.3 mmol scale, NiI<sub>2</sub> (0.03 mmol, 9.4 mg), **L1** (0.036 mmol, 14.5 mg), anhydrous K<sub>3</sub>PO<sub>4</sub> (0.6 mmol, 127.4 mg), 2-(cyclohex-2-en-1-yl)-1-phenylethan-1-one *O*-(3,5-bis(trifluoromethyl)benzoyl) oxime **1v** (0.3 mmol, 136.6 mg), phenylacetylene (0.6 mmol, 61.3 mg) and acetonitrile (3.0 mL) were stirred at 50 °C for 24 h. Then the reaction mixture was quenched with water and extracted with ethyl acetate, washed with water and brine, and dried over anhydrous Na<sub>2</sub>SO<sub>4</sub>. Purification of the crude product by column chromatography on silica gel (eluent: petroleum ether: acetone = 20:1) afforded a mixture of diastereoisomers (d.r. 3:1) in 46% yield (41.4 mg) as a yellow solid.

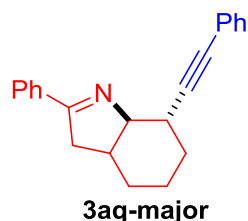

**3aq-major** (35% yield, 31.4 mg); The relative stereochemistry of **3aq-major** was determined by 2D NOESY experiment.  $^1\text{H}$  NMR (600 MHz,  $\text{CDCl}_3$ ):  $\delta$  1.15-1.21 (m, 1H), 1.41-1.46 (m, 1H), 1.63-1.68 (m, 1H), 1.70-1.81 (m, 3H), 2.61-2.66 (m, 1H), 2.71 (dd,  $J = 2.4, 16.2$  Hz, 1H), 2.88-2.92 (m, 1H), 3.39 (q,  $J = 4.2$  Hz, 1H), 4.10 (br, 1H), 7.25-7.30 (m, 3H), 7.39-7.43 (m, 3H), 7.44-7.48 (m, 2H), 7.83-7.86 (m, 2H).  $^{13}\text{C}$  NMR (100 MHz,  $\text{CDCl}_3$ ):  $\delta$  19.64, 27.14, 27.23, 31.66, 35.17, 42.14, 74.23, 81.72, 92.89, 124.00, 127.51, 128.08, 128.12, 128.38, 130.48, 131.64, 134.99, 174.25. IR (neat): 3060, 3026, 2932, 2918, 2855, 2331, 2219, 1678, 1599, 1572, 1489, 1446, 1426, 1333, 1267, 1198, 1180, 1115, 1071, 1055, 1016, 917, 885, 858, 754, 739, 689, 573, 556, 536, 524, 490, 410  $\text{cm}^{-1}$ . HRMS (ESI) calcd. for  $\text{C}_{22}\text{H}_{22}\text{N}$   $[\text{M}+\text{H}]^+$ : 300.1747, found 300.1747.

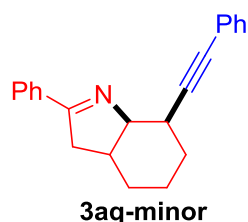

**3aq-minor** (11% yield, 10.0 mg); The relative stereochemistry of **3aq-minor** was determined by 2D NOESY experiment.  $^1\text{H}$  NMR (400 MHz,  $\text{CDCl}_3$ ):  $\delta$  1.36-1.43 (m, 2H), 1.62-1.68 (m, 1H), 1.71-1.82 (m, 3H), 2.45-2.49 (m, 1H), 2.82-2.94 (m, 2H), 3.19-3.23 (m, 1H), 4.19 (t,  $J = 5.6$  Hz, 1H), 7.16-7.22 (m, 3H), 7.25-7.29 (m, 2H), 7.37-7.45 (m, 3H), 7.90-7.93 (m, 2H).  $^{13}\text{C}$  NMR (100 MHz,  $\text{CDCl}_3$ ):  $\delta$  21.09, 26.49, 28.05, 32.52, 37.06, 41.90, 72.06, 82.16, 92.43, 124.10, 127.28, 127.75, 127.93, 128.30, 130.42, 131.62, 135.05, 174.98. IR (neat): 3052, 3030, 2928, 2855, 2199, 1671, 1599, 1573, 1490, 1447, 1338, 1264, 1176, 1156, 1070, 1017, 910, 853, 756, 732, 690, 669, 647, 605, 566, 533  $\text{cm}^{-1}$ . HRMS (ESI) calcd. for  $\text{C}_{22}\text{H}_{22}\text{N}$   $[\text{M}+\text{H}]^+$ : 300.1747, found 300.1745.

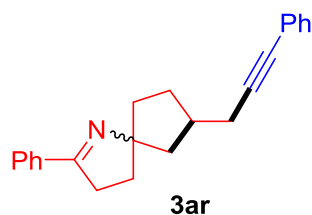

**2-Phenyl-7-(3-phenylprop-2-yn-1-yl)-1-azaspiro[4.4]non-1-ene (3ar).** 0.3 mmol scale, NiI<sub>2</sub> (0.015 mmol, 4.7 mg), L1 (0.018 mmol, 7.2 mg), anhydrous K<sub>3</sub>PO<sub>4</sub> (0.6 mmol, 127.4 mg), 4-methylene-1-phenyloct-7-en-1-one *O*-(3,5-bis(trifluoromethyl)benzoyl) oxime **1w** (0.3 mmol, 140.8 mg), phenylacetylene (0.6 mmol, 61.3 mg) and acetonitrile (3.0 mL) were stirred at 50 °C for 24 h. Then the reaction mixture was quenched with water and extracted with ethyl acetate, washed with water and brine, and dried over anhydrous Na<sub>2</sub>SO<sub>4</sub>. Purification of the crude product by column chromatography on silica gel (eluent: petroleum ether: ethyl acetate: dichloromethane = 20:1:3) afforded a mixture of diastereoisomers (d.r. 7:3) in 60% yield (56.4 mg) as a brown oil. <sup>1</sup>H NMR (600 MHz, CDCl<sub>3</sub>): δ 1.57-1.61 (m, 1H), 1.65-1.69 (m, 0.3H, minor), 1.74-1.80 (m, 1H), 1.83-1.84 (m, 0.3H, minor), 1.86-1.88 (m, 0.3H, minor), 1.89-1.94 (m, 1H), 1.95-2.05 (m, 2H), 2.12-2.18 (m, 1H), 2.19-2.22 (m, 0.7H, major), 2.34-2.37 (m, 0.7H, major), 2.50-2.55 (m, 2H), 2.63-2.67 (m, 0.7H, major), 2.90-2.97 (m, 2H), 7.23-7.26 (m, 3H), 7.37-7.43 (m, 5H), 7.82 (d, *J* = 5.4 Hz, 2H). <sup>13</sup>C NMR (151 MHz, CDCl<sub>3</sub>): δ 25.18 (major), 25.59 (minor), 30.70 (minor), 31.38 (major), 34.75 (minor), 34.90 (major), 36.15 (minor), 36.33 (major), 38.06 (major), 38.24 (minor), 39.02 (minor), 39.47 (major), 45.43 (minor), 45.71 (major), 80.69 (minor), 81.00 (major), 83.22 (minor), 83.34 (major), 89.31 (major), 89.61 (minor), 124.01, 127.37 (minor), 127.40 (major), 127.55, 128.07 (minor), 128.11 (major), 128.26, 130.05 (major), 130.09 (minor), 131.48 (major), 131.52 (minor), 134.76 (minor), 134.88 (major), 169.64 (major), 170.00 (minor) (*3 aromatic carbon signals of the isomers are not observed due to signal overlap*). IR (neat): 3084, 3056, 3026, 2942, 2862, 2237, 1948, 1613, 1575, 1490, 1447, 1341, 1308, 1243, 1178, 1154, 1070, 1024, 990, 913, 842, 754, 690, 559, 526, 511, 410 cm<sup>-1</sup>. HRMS (ESI) calcd. for C<sub>23</sub>H<sub>24</sub>N [M+H]<sup>+</sup>: 314.1903, found 314.1902.

**Late-stage modification of natural products and medicinally relevant molecules**

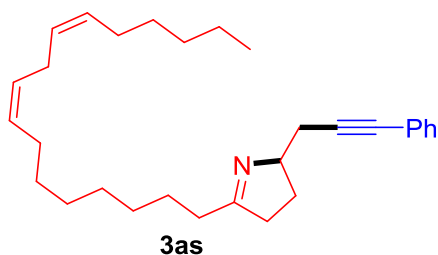

**5-((8Z,11Z)-heptadeca-8,11-dien-1-yl)-2-(3-phenylprop-2-yn-1-yl)-3,4-dihydro-2H-pyrrole (3as).** 0.3 mmol scale, NiI<sub>2</sub> (0.015 mmol, 4.7 mg), **L1** (0.018 mmol, 7.2 mg), anhydrous K<sub>3</sub>PO<sub>4</sub> (0.6 mmol, 127.4 mg), (13Z,16Z)-docosa-1,13,16-trien-5-one *O*-(3,5-bis(trifluoromethyl)benzoyl) oxime **1x** (0.3 mmol, 172.1 mg), phenylacetylene (0.6 mmol, 61.3 mg) and acetonitrile (3.0 mL) were stirred at 50 °C for 24 h. Then the reaction mixture was quenched with water and extracted with dichloromethane, washed with water and brine, and dried over anhydrous Na<sub>2</sub>SO<sub>4</sub>. Purification of the crude product by column chromatography on silica gel (eluent: petroleum ether: ethyl acetate: dichloromethane = 8:1:10) afforded the title product in 60% yield (75.2 mg) as a yellow oil. <sup>1</sup>H NMR (600 MHz, CDCl<sub>3</sub>): δ 0.89 (t, *J* = 7.2 Hz, 3H), 1.27-1.38 (m, 14H), 1.55-1.61 (m, 2H), 1.79-1.83 (m, 1H), 2.01-2.07 (m, 4H), 2.10-2.16 (m, 1H), 2.35 (t, *J* = 7.8 Hz, 2H), 2.44-2.49 (m, 1H), 2.59-2.66 (m, 2H), 2.77 (t, *J* = 6.6 Hz, 2H), 2.84 (dd, *J* = 4.2, 16.8 Hz, 1H), 4.24 (br, 1H), 5.31-5.40 (m, 4H), 7.25-7.28 (m, 3H), 7.36-7.38 (m, 2H). <sup>13</sup>C NMR (151 MHz, CDCl<sub>3</sub>): δ 14.01, 22.51, 25.56, 26.52, 26.58, 27.14, 27.55, 29.08, 29.25, 29.28, 29.40, 29.57, 31.46, 33.81, 37.45, 70.84, 81.46, 87.45, 123.85, 127.51, 127.87, 127.93, 128.09, 130.03, 130.14, 131.52, 179.05 (*1 aliphatic carbon signal is not observed due to signal overlap*). IR (neat): 3082, 3056, 3009, 2926, 2854, 2377, 2329, 2197, 1711, 1643, 1598, 1490, 1456, 1427, 1352, 1312, 1267, 1176, 1070, 1028, 984, 947, 913, 880, 846, 755, 725, 691, 668, 526, 411 cm<sup>-1</sup>. HRMS (ESI) calcd. for C<sub>30</sub>H<sub>44</sub>N [M+H]<sup>+</sup>: 418.3468, found 418.3468.

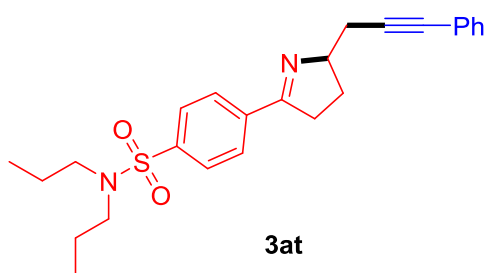

**4-(2-(3-Phenylprop-2-yn-1-yl)-3,4-dihydro-2H-pyrrol-5-yl)-N,N-dipropylbenzenesulfonamide (3at).** 0.3 mmol scale, NiI<sub>2</sub> (0.015 mmol, 4.7 mg), **L1** (0.018 mmol, 7.2 mg), anhydrous K<sub>3</sub>PO<sub>4</sub> (0.6 mmol, 127.4 mg), 4-(1-(((3,5-bis(trifluoromethyl)benzoyl)oxy)imino)pent-4-en-1-yl)-N,N-dipropylbenzenesulfonamide **1y** (0.3 mmol, 173.6 mg), phenylacetylene (0.6 mmol, 61.3 mg) and acetonitrile (3.0 mL) were stirred at 50 °C for 24 h. Then the reaction mixture was quenched with water and extracted with ethyl acetate, washed with water and brine, and dried over anhydrous Na<sub>2</sub>SO<sub>4</sub>. Purification of the crude product by column chromatography on silica gel (eluent: petroleum ether: ethyl acetate = 5:1) afforded the title product in 50% yield (62.8 mg) as a white solid. <sup>1</sup>H NMR (400 MHz, CDCl<sub>3</sub>): δ 0.87 (t, *J* = 7.2 Hz, 6H), 1.50-1.59 (m, 4H), 1.99-2.05 (m, 1H), 2.32-2.37 (m, 1H), 2.75 (dd, *J* = 7.2, 16.8 Hz, 1H), 2.92-3.00 (m, 2H), 3.07-3.16 (m, 5H), 4.53 (br, 1H), 7.25-7.26 (m, 3H), 7.33-7.35 (m, 2H), 7.84 (d, *J* = 8.0 Hz, 2H), 7.97 (d, *J* = 8.0 Hz, 2H). <sup>13</sup>C NMR (100 MHz, CDCl<sub>3</sub>): δ 11.12, 21.86, 26.56, 27.74, 35.52, 49.86, 72.00, 81.85, 86.98, 123.62, 127.09, 127.69, 128.16, 128.27, 131.52, 137.85, 141.72, 172.18. IR (neat): 3052, 2965, 2928, 2873, 2377, 2333, 2163, 1616, 1597, 1565, 1490, 1468, 1442, 1427, 1398, 1339, 1291, 1268, 1188, 1153, 1088, 1071, 1054, 1035, 1024, 1015, 989, 917, 850, 835, 798, 775, 755, 721, 694, 668, 601, 572, 546, 527, 516, 490, 445, 426 cm<sup>-1</sup>. HRMS (ESI) calcd. for C<sub>25</sub>H<sub>31</sub>N<sub>2</sub>O<sub>2</sub>S [M+H]<sup>+</sup>: 423.2101, found 423.2101.

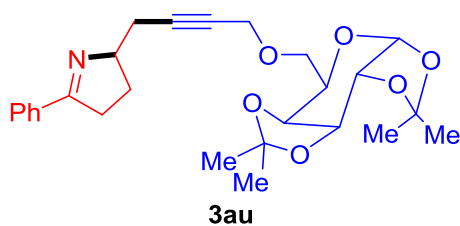

**5-Phenyl-2-(4-(((3aR,5R,5aS,8aS,8bR)-2,2,7,7-tetramethyltetrahydro-5H-bis([1,3]dioxolo)[4,5-b:4',5'-d]pyran-5-yl)methoxy)but-2-yn-1-yl)-3,4-dihydro-2H-pyrrole (3au).** 0.3 mmol scale, NiI<sub>2</sub> (0.015 mmol, 4.7 mg), **L1** (0.018 mmol, 7.2 mg), anhydrous K<sub>3</sub>PO<sub>4</sub> (0.6 mmol, 127.4 mg), 1-phenylpent-4-en-1-one *O*-(3,5-bis(trifluoromethyl)benzoyl)oxime **1a-3** (0.3 mmol, 124.6 mg), (3aR,5R,5aS,8aS,8bR)-2,2,7,7-tetramethyl-5-((prop-2-yn-1-yloxy)methyl)tetrahydro-5H-bis([1,3]dioxolo)[4,5-b:4',5'-d]pyran **2w** (0.6

mmol, 179.0 mg) and acetonitrile (3.0 mL) were stirred at 50 °C for 24 h. Then the reaction mixture was quenched with water and extracted with ethyl acetate, washed with water and brine, and dried over anhydrous Na<sub>2</sub>SO<sub>4</sub>. Purification of the crude product by column chromatography on silica gel (eluent: petroleum ether: ethyl acetate = 3:1) afforded the title product in 66% yield (90.7 mg) as a light-yellow oil. <sup>1</sup>H NMR (600 MHz, CDCl<sub>3</sub>): δ 1.32 (s, 6H), 1.44 (s, 3H), 1.54 (s, 3H), 1.87-1.90 (m, 1H), 2.26-2.27 (m, 1H), 2.50 (dd, *J* = 7.2, 16.5 Hz, 1H), 2.80 (d, *J* = 16.2 Hz, 1H), 2.88-2.94 (m, 1H), 3.07-3.11 (m, 1H), 3.60-3.63 (m, 1H), 3.70-3.73 (m, 1H), 3.93-3.98 (m, 1H), 4.12-4.23 (m, 3H), 4.29-4.30 (m, 1H), 4.39 (br, 1H), 4.57 (t, *J* = 7.2 Hz, 1H), 5.53 (d, *J* = 3.6 Hz, 1H), 7.39-7.43 (m, 3H), 7.84 (d, *J* = 6.6 Hz, 2H). <sup>13</sup>C NMR (151 MHz, CDCl<sub>3</sub>): δ 24.36, 24.40, 24.82, 25.87, 25.88, 25.96, 27.61, 27.67, 35.20, 58.86, 58.87, 66.53, 66.56, 68.18, 68.21, 70.39, 70.56, 71.02, 71.04, 71.48, 76.96, 84.24, 96.24, 108.42, 108.44, 109.12, 109.14, 127.69, 128.31, 128.33, 130.41, 130.43, 134.26, 173.26, 173.27. IR (neat): 3060, 3026, 2986, 2934, 2379, 2333, 2237, 1715, 1615, 1575, 1494, 1449, 1372, 1343, 1308, 1254, 1210, 1167, 1097, 1066, 1000, 917, 890, 863, 824, 804, 761, 733, 693, 668, 649, 557, 511 cm<sup>-1</sup>. HRMS (ESI) calcd. for C<sub>26</sub>H<sub>34</sub>N [M+H]<sup>+</sup>: 456.2381, found 456.2380.

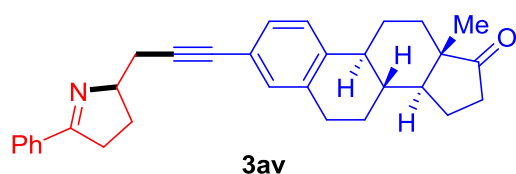

**(8R,9S,13S,14S)-13-Methyl-3-(3-(5-phenyl-3,4-dihydro-2H-pyrrol-2-yl)prop-1-yn-1-yl)-6,7,8,9,11,12,13,14,15,16-decahydro-17H-cyclopenta[a]phenanthren-17-one (3av).** 0.3 mmol scale, NiI<sub>2</sub> (0.015 mmol, 4.7 mg), **L1** (0.018 mmol, 7.2 mg), anhydrous K<sub>3</sub>PO<sub>4</sub> (0.6 mmol, 127.4 mg), 1-phenylpent-4-en-1-one *O*-(3,5-bis(trifluoromethyl)benzoyl) oxime **1a-3** (0.3 mmol, 124.6 mg), (8R,9S,13S,14S)-3-ethynyl-13-methyl-6,7,8,9,11,12,13,14,15,16-decahydro-17H-cyclopenta[a]phenanthren-17-one **2x** (0.6 mmol, 167.0 mg) and acetonitrile (3.0 mL) were stirred at 50 °C for 24 h. Then the reaction mixture was quenched with water and extracted with ethyl acetate, washed with water and brine, and dried over anhydrous Na<sub>2</sub>SO<sub>4</sub>. Purification

of the crude product by column chromatography on silica gel (eluent: petroleum ether: ethyl acetate = 10:1) afforded the title product in 60% yield (79.0 mg) as a white solid. <sup>1</sup>H NMR (400 MHz, CDCl<sub>3</sub>): δ 0.89 (s, 3H), 1.36-1.66 (m, 6H), 1.94-2.18 (m, 5H), 2.23-2.32 (m, 2H), 2.36-2.40 (m, 1H), 2.49 (dd, *J* = 8.4, 18.8 Hz, 1H), 2.69 (dd, *J* = 7.6, 16.4 Hz, 1H), 2.81-2.84 (m, 2H), 2.89-2.99 (m, 2H), 3.08-3.16 (m, 1H), 4.49 (br, 1H), 7.08 (s, 1H), 7.12 (d, *J* = 8.4 Hz, 1H), 7.17 (d, *J* = 8.0 Hz, 1H), 7.39-7.45 (m, 3H), 7.86 (d, *J* = 6.8 Hz, 2H). <sup>13</sup>C NMR (151 MHz, CDCl<sub>3</sub>): δ 13.72, 21.47, 25.48, 26.23, 26.64, 27.68, 28.94, 31.44, 35.31, 35.73, 37.87, 44.27, 47.83, 50.37, 71.70, 81.59, 86.60, 121.04, 125.13, 127.72, 128.33, 128.79, 130.44, 132.00, 134.34, 136.31, 139.43, 173.35, 220.64. IR (neat): 3072, 3024, 2965, 2951, 2931, 2903, 2870, 2851, 2379, 2329, 2163, 1736, 1690, 1605, 1572, 1493, 1447, 1406, 1373, 1340, 1277, 1253, 1214, 1186, 1136, 1082, 1053, 1022, 1007, 965, 909, 890, 845, 824, 781, 761, 731, 691, 668, 641, 616, 577, 560, 514, 499, 472, 445, 413 cm<sup>-1</sup>. HRMS (ESI) calcd. for C<sub>31</sub>H<sub>34</sub>NO [M+H]<sup>+</sup>: 436.2635, found 436.2635.

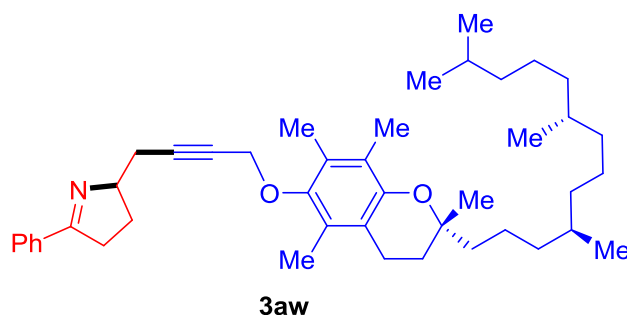

**5-Phenyl-2-(4-(((*R*)-2,5,7,8-tetramethyl-2-(((4*R*,8*R*)-4,8,12-trimethyltridecyl)chroman-6-yl)oxy)but-2-yn-1-yl)-3,4-dihydro-2*H*-pyrrole (3aw).** 0.3 mmol scale, NiI<sub>2</sub> (0.015 mmol, 4.7 mg), **L1** (0.018 mmol, 7.2 mg), anhydrous K<sub>3</sub>PO<sub>4</sub> (0.6 mmol, 127.4 mg), 1-phenylpent-4-en-1-one *O*-(3,5-bis(trifluoromethyl)benzoyl) oxime **1a-3** (0.3 mmol, 124.6 mg), (*R*)-2,5,7,8-tetramethyl-6-(prop-2-yn-1-yloxy)-2-(((4*R*,8*R*)-4,8,12-trimethyltridecyl)chromane **2y** (0.6 mmol, 281.3 mg) and acetonitrile (3.0 mL) were stirred at 50 °C for 24 h. Then the reaction mixture was quenched with water and extracted with dichloromethane, washed with water and brine, and dried over anhydrous Na<sub>2</sub>SO<sub>4</sub>. Purification of the crude product by column chromatography on silica gel (eluent: petroleum ether: ethyl acetate: dichloromethane = 30:1:20) afforded the title product in 53%

yield (98.6 mg) as a yellow oil.  $^1\text{H}$  NMR (400 MHz,  $\text{CDCl}_3$ ):  $\delta$  0.76-0.79 (m, 12H), 0.97-1.08 (m, 6H), 1.14-1.24 (m, 11H), 1.26-1.38 (m, 4H), 1.41-1.47 (m, 3H), 1.63-1.74 (m, 2H), 1.75-1.81 (m, 1H), 1.98 (s, 3H), 2.04 (s, 3H), 2.08 (s, 3H), 2.14-2.18 (m, 1H), 2.41-2.46 (m, 3H), 2.71-2.85 (m, 2H), 2.93-2.97 (m, 1H), 4.24 (s, 2H), 4.30-4.32 (m, 1H), 7.29-7.34 (m, 3H), 7.75 (d,  $J = 7.2$  Hz, 2H).  $^{13}\text{C}$  NMR (100 MHz,  $\text{CDCl}_3$ ):  $\delta$  11.72, 12.15, 12.99, 19.59, 19.69, 20.56, 20.95, 22.57, 22.66, 23.80, 24.37, 24.73, 26.11, 27.68, 27.90, 31.19, 32.62, 32.72, 35.24, 37.21, 37.35, 37.38, 37.40, 39.30, 40.03, 61.02, 71.44, 74.73, 77.25, 84.19, 117.35, 122.74, 126.06, 127.76, 127.97, 128.33, 130.51, 134.23, 147.85, 148.00, 173.46. IR (neat): 3084, 3054, 3032, 2924, 2866, 2724, 2375, 2329, 2231, 1616, 1576, 1496, 1456, 1412, 1376, 1365, 1340, 1312, 1252, 1156, 1084, 1060, 983, 917, 864, 844, 807, 759, 737, 692, 668, 609, 557, 473, 412  $\text{cm}^{-1}$ . HRMS (ESI) calcd. for  $\text{C}_{43}\text{H}_{64}\text{NO}_2$   $[\text{M}+\text{H}]^+$ : 626.4932, found 626.4939.

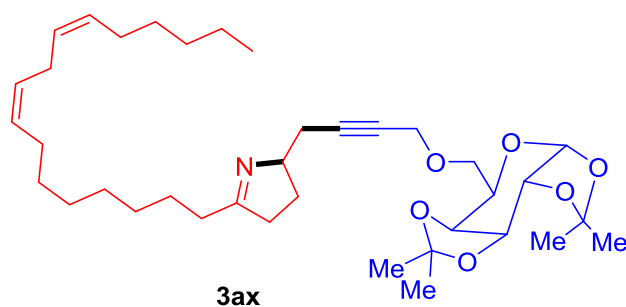

**5-((8Z,11Z)-Heptadeca-8,11-dien-1-yl)-2-(4-(((3aR,5R,5aS,8aS,8bR)-2,2,7,7-tetramethyltetrahydro-5H-bis([1,3]dioxolo)[4,5-b:4',5'-d]pyran-5-yl)methoxy)but-2-yn-1-yl)-3,4-dihydro-2H-pyrrole (3ax).** 0.3 mmol scale,  $\text{NiI}_2$  (0.015 mmol, 4.7 mg), **L1** (0.018 mmol, 7.2 mg), anhydrous  $\text{K}_3\text{PO}_4$  (0.6 mmol, 127.4 mg), (13Z,16Z)-docosa-1,13,16-trien-5-one *O*-(3,5-bis(trifluoromethyl)benzoyl) oxime **1x** (0.3 mmol, 172.1 mg), (3aR,5R,5aS,8aS,8bR)-2,2,7,7-tetramethyl-5-((prop-2-yn-1-yloxy)methyl)tetrahydro-5H-bis([1,3]dioxolo)[4,5-b:4',5'-d]pyran **2w** (0.6 mmol, 179.0 mg) and acetonitrile (3.0 mL) were stirred at 80 °C for 24 h. Then the reaction mixture was quenched with water and extracted with ethyl acetate, washed with water and brine, and dried over anhydrous  $\text{Na}_2\text{SO}_4$ . Purification of the crude product by column chromatography on silica gel (eluent: petroleum ether: ethyl acetate = 2:1) afforded the title product in 52% yield (95.8 mg) as a



yellow oil.  $^1\text{H}$  NMR (400 MHz,  $\text{CDCl}_3$ ):  $\delta$  0.89 (t,  $J = 6.8$  Hz, 3H), 1.26-1.39 (m, 21H), 1.45 (s, 3H), 1.54 (s, 3H), 1.57 (br, 1H), 1.64-1.73 (m, 1H), 2.00-2.14 (m, 5H), 2.31-2.48 (m, 4H), 2.56-2.57 (m, 1H), 2.67 (dd,  $J = 2.0, 16.6$  Hz, 1H), 2.77 (t,  $J = 6.4$  Hz, 2H), 3.61-3.65 (m, 1H), 3.73 (dd,  $J = 5.6, 10.0$  Hz, 1H), 3.96-4.00 (m, 1H), 4.14 (br, 1H), 4.18-4.20 (m, 2H), 4.26 (dd,  $J = 2.0, 7.8$  Hz, 1H), 4.31 (dd,  $J = 2.4, 5.2$  Hz, 1H), 4.60 (dd,  $J = 2.4, 8.0$  Hz, 1H), 5.29-5.42 (m, 4H), 5.54 (d,  $J = 5.2$  Hz, 1H).  $^{13}\text{C}$  NMR (151 MHz,  $\text{CDCl}_3$ ):  $\delta$  14.04, 22.53, 24.45, 24.89, 25.59, 25.96, 25.99, 26.03, 26.55, 27.17, 27.72, 29.14, 29.26, 29.30, 29.44, 29.48, 29.60, 31.49, 33.83, 37.33, 59.01, 66.65, 68.25, 68.27, 70.49, 70.65, 70.82, 71.15, 71.17, 84.46, 96.33, 108.53, 109.24, 127.89, 127.98, 130.06, 130.18, 179.02. IR (neat): 2981, 2926, 2855, 2351, 2329, 2169, 1713, 1642, 1457, 1380, 1306, 1254, 1210, 1168, 1099, 1068, 1001, 917, 891, 865, 823, 805, 771, 725, 668, 650, 511, 423, 416  $\text{cm}^{-1}$ . HRMS (ESI) calcd. for  $\text{C}_{37}\text{H}_{60}\text{NO}_6$   $[\text{M}+\text{H}]^+$ : 614.4415, found 614.4419.

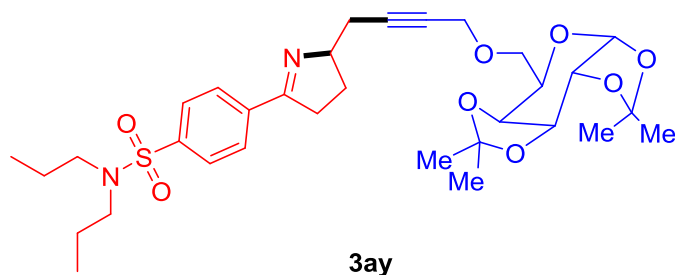

**5-(4-(Heptan-4-ylsulfonyl)phenyl)-2-(4-(((3aR,5R,5aS,8aS,8bR)-2,2,7,7-tetramethyltetrahydro-5H-bis([1,3]dioxolo)[4,5-b:4',5'-d]pyran-5-yl)methoxy)but-2-yn-1-yl)-3,4-dihydro-2H-pyrrole (3ay).** 0.3 mmol scale,  $\text{NiI}_2$  (0.015 mmol, 4.7 mg), **L1** (0.018 mmol, 7.2 mg), anhydrous  $\text{K}_3\text{PO}_4$  (0.6 mmol, 127.4 mg), 4-(1-(((3,5-bis(trifluoromethyl)benzoyl)oxy)imino)pent-4-en-1-yl)-*N,N*-dipropylbenzenesulfonamide **1y** (0.3 mmol, 173.6 mg), (3aR,5R,5aS,8aS,8bR)-2,2,7,7-tetramethyl-5-((prop-2-yn-1-yloxy)-methyl)tetrahydro-5H-bis([1,3]dioxolo)[4,5-b:4',5'-d]pyran **2w** (0.6 mmol, 179.0 mg) and acetonitrile (3.0 mL) were stirred at 80  $^\circ\text{C}$  for 24 h. Then the reaction mixture was quenched with water and extracted with ethyl acetate, washed with water and brine, and dried over anhydrous  $\text{Na}_2\text{SO}_4$ . Purification of the crude product by column chromatography on silica gel (eluent: petroleum ether: ethyl acetate = 8:1) afforded the title

product in 58% yield (107.8 mg) as a yellow oil.  $^1\text{H}$  NMR (400 MHz,  $\text{CDCl}_3$ ):  $\delta$  0.87 (t,  $J = 7.2$  Hz, 6H), 1.33 (s, 3H), 1.34 (s, 3H), 1.45 (s, 3H) 1.50-1.59 (m, 7H), 1.89-1.94 (m, 1H), 2.29-2.33 (m, 1H), 2.50-2.56 (m, 1H), 2.77-2.83 (m, 1H), 2.91-2.97 (m, 1H), 3.07-3.13 (m, 5H), 3.63 (dd,  $J = 7.2, 10.0$  Hz, 1H), 3.71 (dd,  $J = 5.6, 10.2$  Hz, 1H), 3.95-3.98 (m, 1H), 4.13-4.24 (m, 3H), 4.31 (dd,  $J = 2.4, 5.0$  Hz, 1H), 4.40-4.43 (m, 1H), 4.60 (dd,  $J = 2.4, 7.8$  Hz, 1H), 5.53 (d,  $J = 5.2$  Hz, 1H), 7.83 (d,  $J = 8.4$  Hz, 2H), 7.95 (d,  $J = 8.4$  Hz, 2H).  $^{13}\text{C}$  NMR (100 MHz,  $\text{CDCl}_3$ ):  $\delta$  11.10, 21.86, 24.43, 24.44, 24.85, 25.91, 25.93, 26.00, 27.73, 35.40, 49.86, 58.93, 66.60, 66.61, 68.27, 68.30, 70.43, 70.59, 71.11, 71.87, 77.24, 83.93, 96.29, 108.50, 109.21, 127.05, 128.26, 137.78, 141.68, 172.12. IR (neat): 3054, 2968, 2934, 2876, 2379, 2349, 2158, 1733, 1616, 1565, 1458, 1381, 1339, 1255, 1211, 1156, 1090, 1067, 996, 918, 890, 866, 798, 774, 735, 701, 668, 651, 598, 574, 542, 511, 417  $\text{cm}^{-1}$ . HRMS (ESI) calcd. for  $\text{C}_{32}\text{H}_{47}\text{N}_2\text{O}_8\text{S}$   $[\text{M}+\text{H}]^+$ : 619.3048, found 619.3048.

### Gram scale study

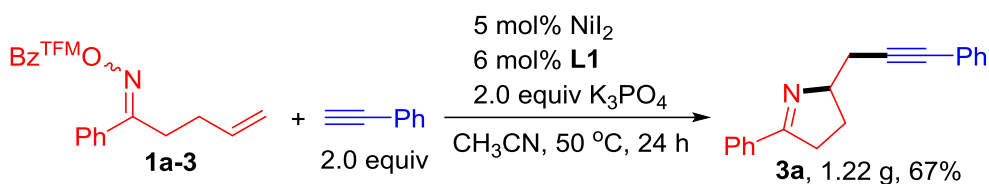

To an oven-dried sealable Schlenk tube (150.0 mL) equipped with a stir bar was added  $\text{NiI}_2$  (0.35 mmol, 109.4 mg), **L1** (0.42 mmol, 168.7 mg), anhydrous  $\text{K}_3\text{PO}_4$  (14.0 mmol, 2.97 g) and acetonitrile (70.0 mL) using standard Schlenk technique under nitrogen atmosphere. The mixture was stirred at room temperature for 5 min. Then oxime ester **1a-3** (7.0 mmol, 2.91 g) and phenylacetylene (14.0 mmol, 1.43 g) were added in sequence. The tube was securely sealed with parafilm and immersed into an oil bath preheated at 50  $^\circ\text{C}$ . After stirring for 24 h, the reaction mixture was cooled to room temperature and quenched with water. The organic phase was extracted with ethyl acetate. The combined organic layers were washed with water and brine, and dried over anhydrous  $\text{Na}_2\text{SO}_4$ . The resulting solution was concentrated under vacuum and the residue was purified by column chromatography on silica gel (eluent: petroleum ether: ethyl acetate: dichloromethane = 15:1:3) to afford product **3a** in 67% yield (1.22 g) as a yellow oil. *This result highlights the*

robustness and scalability of this process, as no significant loss in yield was observed when it was scaled up to 7.0 mmol scale.

## Synthetic transformations of 3a

### Synthesis of compound 4

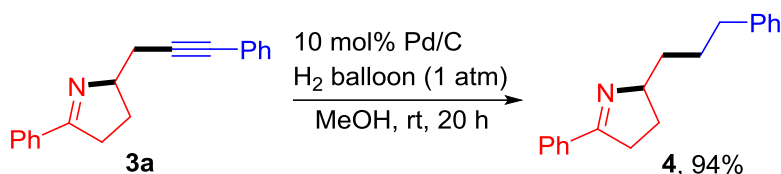

The reaction was performed according to a literature procedure.<sup>12</sup> To an oven-dried round-bottom flask (25.0 mL) equipped with a stir bar was added **3a** (0.3 mmol, 77.8 mg), Pd/C (10% w, 12.0 mg) and methanol (4.0 mL). Then the reaction mixture was stirred at room temperature for 20 h under a H<sub>2</sub> balloon (1 atm). After the indicated time, the mixture was filtered through a celite pad and washed with additional methanol. The resulting solution was concentrated under vacuum and the residue was purified by column chromatography on silica gel (eluent: petroleum ether: ethyl acetate = 5:1) to afford the title product **4** in 94% yield (74.5 mg) as a yellow oil.

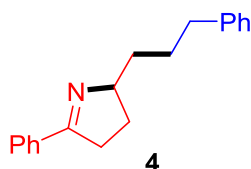

**5-Phenyl-2-(3-phenylpropyl)-3,4-dihydro-2H-pyrrole (4).** <sup>1</sup>H NMR (600 MHz, CDCl<sub>3</sub>): δ 1.52-1.60 (m, 2H), 1.76-1.81 (m, 1H), 1.82-1.91 (m, 2H), 2.14-2.19 (m, 1H), 2.65-2.73 (m, 2H), 2.81-2.87 (m, 1H), 2.95-3.00 (m, 1H), 4.16-4.20 (m, 1H), 7.16 (t, *J* = 7.2 Hz, 1H), 7.19-7.22 (m, 2H), 7.26 (t, *J* = 7.2 Hz, 2H), 7.36-7.40 (m, 3H), 7.82-7.83 (m, 2H). <sup>13</sup>C NMR (151 MHz, CDCl<sub>3</sub>): δ 28.44, 34.86, 36.00, 36.25, 73.05, 125.57, 127.56, 128.17, 128.27, 128.37, 130.16, 134.65, 142.49, 171.74 (*1 aliphatic carbon signal is not observed due to signal overlap*). IR (neat): 3086, 3062, 3026, 2929, 2857, 1614, 1575, 1495, 1449, 1336, 1180, 1085, 1075, 1022, 921, 844, 759, 692, 668, 592, 557, 494 cm<sup>-1</sup>. HRMS (ESI) calcd. for C<sub>19</sub>H<sub>22</sub>N [M+H]<sup>+</sup>: 264.1746, found 264.1746.

## Synthesis of compound 5

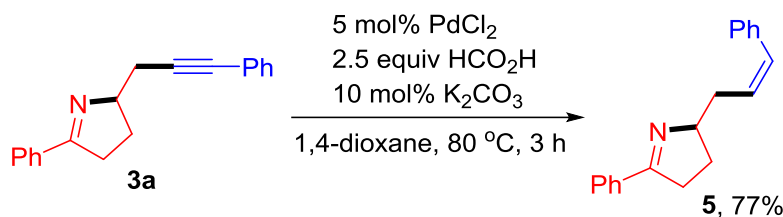

This reaction was performed according to an adapted version of a literature procedure.<sup>13</sup> **3a** (0.3 mmol, 77.8 mg), PdCl<sub>2</sub> (0.015 mmol, 2.7 mg), K<sub>2</sub>CO<sub>3</sub> (0.03 mmol, 4.1 mg) and 1,4-dioxane (3.0 mL) were successively added to an oven-dried sealable Schlenk tube (15.0 mL) under nitrogen atmosphere. Then formic acid (0.75 mmol, 34.5 mg) was added at once within a minute, and the tube was immersed into an oil bath preheated at 80 °C. After stirring for 3 h, the reaction mixture was cooled to room temperature and quenched with water. The organic phase was extracted with ethyl acetate. The combined organic layers were washed with water and brine, and dried over anhydrous Na<sub>2</sub>SO<sub>4</sub>. The resulting solution was concentrated under vacuum and the residue was purified by column chromatography on silica gel (eluent: petroleum ether: ethyl acetate = 10:1) to afford the title product **5** in 77% yield (60.6 mg) as a white solid.

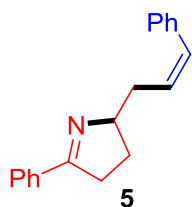

**(Z)-5-Phenyl-2-(3-phenylallyl)-3,4-dihydro-2H-pyrrole (5).** <sup>1</sup>H NMR (400 MHz, CDCl<sub>3</sub>): δ 1.58-1.68 (m, 1H), 2.15-2.23 (m, 1H), 2.57-2.65 (m, 1H), 2.83-2.92 (m, 2H), 2.95-3.03 (m, 1H), 4.32-4.36 (m, 1H), 5.81 (dt, *J* = 7.2, 12.0 Hz, 1H), 6.55 (dt, *J* = 2.0, 11.6 Hz, 1H), 7.18-7.23 (m, 1H), 7.27-7.34 (m, 4H), 7.36-7.42 (m, 3H), 7.81-7.85 (m, 2H). <sup>13</sup>C NMR (100 MHz, CDCl<sub>3</sub>): δ 28.05, 35.04, 35.27, 73.07, 126.54, 127.67, 128.10, 128.35, 128.79, 129.34, 130.34, 130.46, 134.52, 137.53, 172.53. IR (neat): 3086, 3054, 3023, 2939, 1614, 1574, 1494, 1447, 1335, 1307, 1261, 1178, 1076, 1057, 1027, 915, 804, 759, 691, 668, 618, 557, 507, 416, 407 cm<sup>-1</sup>. HRMS (ESI) calcd. for C<sub>19</sub>H<sub>20</sub>N [M+H]<sup>+</sup>: 262.1590, found 262.1589.

## Synthesis of compound 6

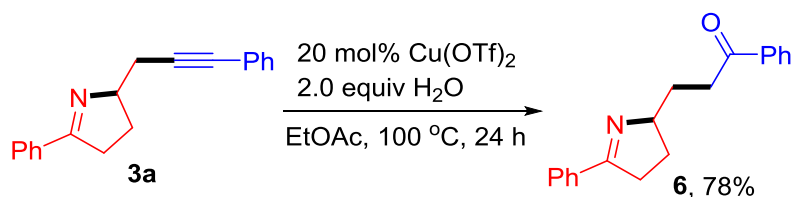

The reaction was performed according to a literature procedure.<sup>14</sup> Cu(OTf)<sub>2</sub> (0.2 mmol, 72.3 mg) and water (2.0 mmol, 36.0 mg) were added to a solution of **3a** (1.0 mmol, 259.4 mg) in EtOAc (2.0 mL). The reaction mixture was stirred at 100 °C for 24 h. After completion of the reaction, the mixture was cooled to room temperature, and water was added. The organic phase was extracted with ethyl acetate. The combined organic layers were washed with water and brine, and dried over anhydrous Na<sub>2</sub>SO<sub>4</sub>. The resulting solution was concentrated under vacuum and the residue was purified by column chromatography on silica gel (eluent: petroleum ether: ethyl acetate = 5:1) to afford the title product **6** in 78% yield (215.9 mg) as a yellow solid.

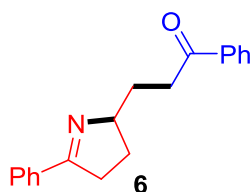

**1-Phenyl-3-(5-phenyl-3,4-dihydro-2H-pyrrol-2-yl)propan-1-one (6).** <sup>1</sup>H NMR (600 MHz, CDCl<sub>3</sub>): δ 1.63-1.70 (m, 1H), 1.98-2.04 (m, 1H), 2.12-2.17 (m, 1H), 2.25-2.31 (m, 1H), 2.90-2.95 (m, 1H), 3.03-3.08 (m, 1H), 3.22-3.27 (m, 1H), 3.32-3.37 (m, 1H), 4.27-4.29 (m, 1H), 7.39-7.44 (m, 3H), 7.46 (t, *J* = 7.8 Hz, 2H), 7.56 (t, *J* = 7.8 Hz, 1H), 7.84 (d, *J* = 6.6 Hz, 2H), 8.01-8.03 (m, 2H). <sup>13</sup>C NMR (151 MHz, CDCl<sub>3</sub>): δ 28.88, 31.32, 35.04, 36.17, 72.50, 127.65, 128.15, 128.39, 128.52, 130.36, 132.88, 134.63, 137.05, 172.41, 200.42. IR (neat): 3056, 3019, 2975, 2937, 2902, 2866, 2847, 1683, 1610, 1596, 1573, 1494, 1448, 1409, 1370, 1338, 1307, 1254, 1203, 1183, 1070, 1058, 1036, 1024, 996, 968, 923, 880, 754, 740, 686, 625, 615, 560, 539, 414 cm<sup>-1</sup>. HRMS (ESI) calcd. for C<sub>19</sub>H<sub>20</sub>NO [M+H]<sup>+</sup>: 278.1539, found 278.1539.

## Synthesis of compound 7

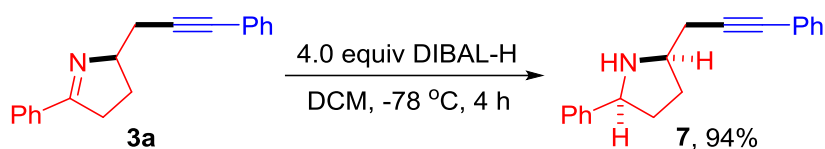

The reaction was performed according to a literature procedure.<sup>15</sup> To a solution of **3a** (0.3 mmol, 77.8 mg) in dichloromethane (3.0 mL) was added dropwise DIBAL-H (1.5 M in toluene) (1.2 mmol, 0.8 mL) at -78 °C under nitrogen atmosphere. The reaction mixture was stirred at -78 °C for 4 h. Then it was quenched with saturated NH<sub>4</sub>Cl aqueous solution. The organic phase was extracted with ethyl acetate. The combined organic layers were washed with water and brine, and dried over anhydrous Na<sub>2</sub>SO<sub>4</sub>. The resulting solution was concentrated under vacuum and the residue was purified by column chromatography on silica gel which was pretreated with triethylamine before loading the sample (eluent: petroleum ether: ethyl acetate = 10:1 to 5:1, gradient) to afford the title product **7** in 94% yield (73.4 mg) as a yellow oil. The relative stereochemistry of **7** was determined by 1D differential NOESY experiment.

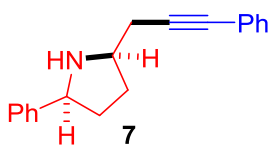

**2-Phenyl-5-(3-phenylprop-2-yn-1-yl)pyrrolidine (7).** <sup>1</sup>H NMR (600 MHz, CDCl<sub>3</sub>): δ 1.63-1.71 (m, 2H), 1.91-1.97 (m, 1H), 2.04-2.09 (m, 1H), 2.37 (br, 1H), 2.52- 2.59 (m, 2H), 3.37-3.41 (m, 1H), 4.10 (t, *J* = 8.4 Hz, 1H), 7.12 (t, *J* = 7.2 Hz, 1H), 7.14-7.18 (m, 3H), 7.20 (t, *J* = 7.2 Hz, 2H), 7.30-7.33 (m, 4H). <sup>13</sup>C NMR (151 MHz, CDCl<sub>3</sub>): δ 26.84, 30.76, 34.18, 57.53, 62.57, 81.65, 87.95, 123.69, 126.54, 126.75, 127.56, 128.10, 128.21, 131.50, 144.68. IR (neat): 3082, 3058, 3028, 2933, 2375, 2331, 2233, 1952, 1875, 1814, 1729, 1599, 1573, 1545, 1490, 1442, 1399, 1345, 1271, 1172, 1105, 1070, 1027, 912, 844, 754, 690, 668, 629, 558, 526 cm<sup>-1</sup>. HRMS (ESI) calcd. for C<sub>19</sub>H<sub>20</sub>N [M+H]<sup>+</sup>: 262.1590, found 262.1589.

## Synthesis of compound 8

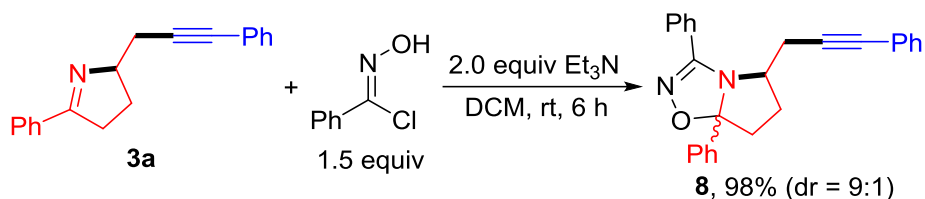

This reaction was performed according to a literature procedure.<sup>15</sup> To a round-bottom flask (25.0 mL) equipped with a stir bar was added **3a** (0.3 mmol, 77.8 mg), *N*-hydroxybenzimidoyl chloride (0.45 mmol, 70.0 mg), Et<sub>3</sub>N (0.6 mmol, 60.7 mg) and dichloromethane (6.0 mL). The reaction mixture was stirred at room temperature for 6 h. After completion of the reaction, the solvent was removed in vacuo, and the residue was purified directly by column chromatography on silica gel (eluent: petroleum ether: ethyl acetate = 25:1) to afford a mixture of diastereoisomers (d.r. 9:1) in 98% yield (110.8 mg) as a white solid.

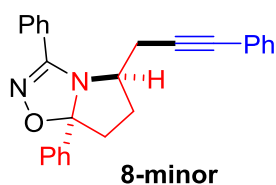

**3,7a-Diphenyl-5-(3-phenylprop-2-yn-1-yl)-5,6,7,7a-tetrahydropyrrolo[1,2-*d*][1,2,4]oxadiazole (8). 8-minor** (10% yield, 11 mg); The relative stereochemistry of **8-minor** was determined by 1D differential NOESY experiment. <sup>1</sup>H NMR (600 MHz, CDCl<sub>3</sub>): δ 2.30-2.43 (m, 3H), 2.47-2.55 (m, 2H), 2.74-2.78 (m, 1H), 4.06-4.09 (m, 1H), 7.25-7.31 (m, 4H), 7.35-7.38 (m, 4H), 7.40-7.44 (m, 3H), 7.65 (d, *J* = 7.8 Hz, 2H), 7.85-7.86 (m, 2H). <sup>13</sup>C NMR (151 MHz, CDCl<sub>3</sub>): δ 23.22, 32.65, 36.92, 62.83, 83.02, 85.82, 110.08, 123.20, 124.92, 127.44, 127.61, 127.96, 128.12, 128.16, 128.25, 128.85, 130.81, 131.51, 143.61, 157.04. IR (neat): 3062, 3030, 2991, 2969, 2929, 2379, 2331, 2161, 1958, 1814, 1717, 1682, 1589, 1557, 1489, 1443, 1431, 1366, 1350, 1329, 1293, 1265, 1202, 1170, 1146, 1072, 1026, 990, 963, 942, 919, 864, 852, 767, 759, 727, 692, 668, 654, 552, 527, 493, 469, 434, 411 cm<sup>-1</sup>. HRMS (ESI) calcd. for C<sub>26</sub>H<sub>23</sub>N<sub>2</sub>O [M+H]<sup>+</sup>: 379.1805, found 379.1805.

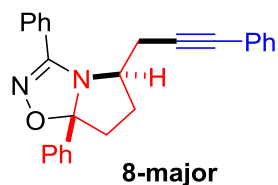

**8-major** (88% yield, 99.8 mg); The relative stereochemistry of **8-major** was determined by 1D differential NOESY experiment. <sup>1</sup>H NMR (600 MHz, CDCl<sub>3</sub>): δ 2.08 (dd, *J* = 6.6, 12.6 Hz, 1H), 2.20-2.27 (m, 1H), 2.49-2.55 (m, 1H), 2.65-2.75 (m, 2H), 2.82 (dd, *J* = 6.0, 16.8 Hz, 1H), 3.88-3.92 (m, 1H), 7.25-7.31 (m, 4H), 7.33-7.38 (m, 6H), 7.42 (t, *J* = 7.2 Hz, 1H), 7.72 (d, *J* = 7.2 Hz, 2H), 7.94 (d, *J* = 7.2 Hz, 2H). <sup>13</sup>C NMR (151 MHz, CDCl<sub>3</sub>): δ 25.72, 29.47, 38.26, 64.15, 82.72, 86.71, 109.59, 123.14, 125.16, 126.73, 127.98, 128.01, 128.18, 128.25, 128.71, 130.72, 131.47, 142.69, 159.12 (*l aromatic carbon signal is not observed due to signal overlap*). IR (neat): 3058, 3030, 2924, 2872, 2853, 2375, 2333, 1956, 1594, 1559, 1490, 1445, 1355, 1321, 1248, 1222, 1176, 1109, 1090, 1071, 1026, 1002, 985, 914, 880, 755, 690, 646, 526, 480, 436 cm<sup>-1</sup>. HRMS (ESI) calcd. for C<sub>26</sub>H<sub>23</sub>N<sub>2</sub>O [M+H]<sup>+</sup>: 379.1805, found 379.1805.

## Mechanistic studies:

### Radical trap experiment

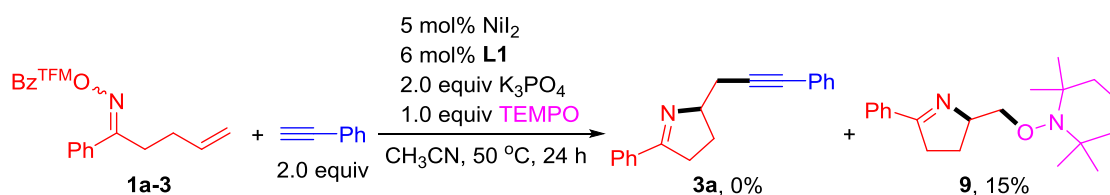

In a nitrogen-filled glovebox, NiI<sub>2</sub> (0.015 mmol, 4.7 mg), L1 (0.018 mmol, 7.2 mg), anhydrous K<sub>3</sub>PO<sub>4</sub> (0.6 mmol, 127.4 mg) and acetonitrile (3.0 mL) were successively added to an oven-dried sealable Schlenk tube (15.0 mL). The mixture was stirred at room temperature for 5min. Then oxime ester **1a-3** (0.3 mmol, 124.6 mg), 2,2,6,6-tetramethylpiperidine-*N*-oxyl (TEMPO, 0.3 mmol, 46.9 mg) and phenylacetylene (0.6 mmol, 61.3 mg) were added in sequence. The tube was securely sealed with parafilm, taken outside the glovebox and immersed into an oil bath preheated at 50 °C. After stirring for 24 h, the reaction mixture was cooled to room temperature and quenched with water. The organic phase was extracted with ethyl acetate. The combined organic layers were



washed with water and brine, and dried over anhydrous Na<sub>2</sub>SO<sub>4</sub>. The resulting solution was concentrated under vacuum and the residue was purified by preparative TLC on silica gel (eluent: petroleum ether: ethyl acetate = 8:1) to afford TEMPO-trapped adduct **9** in 15% yield (14.0 mg) as a white solid. While the desired transformation was seriously inhibited, and no product **3a** was detected in the reaction mixture. *This result indicates that the reaction might proceed via the corresponding carbon-centered radical.*

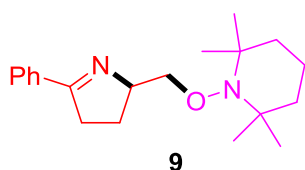

### 2,2,6,6-Tetramethyl-1-((5-phenyl-3,4-dihydro-2H-pyrrol-2-yl)methoxy)piperidine (**9**).

<sup>1</sup>H NMR (600 MHz, CDCl<sub>3</sub>): δ 0.95 (s, 3H), 1.10 (s, 3H), 1.16 (s, 3H), 1.21 (s, 3H), 1.26-1.30 (m, 2H), 1.39-1.46 (m, 4H), 2.04-2.05 (m, 1H), 2.11-2.18 (m, 1H), 2.96-3.03 (m, 2H), 3.96 (br, 1H), 4.07-4.09 (m, 1H), 4.44 (br, 1H), 7.41 (br, 3H), 7.85-7.86 (m, 2H). <sup>13</sup>C NMR (151 MHz, CDCl<sub>3</sub>): δ 17.05, 19.99, 20.23, 25.87, 32.99, 33.19, 35.38, 39.60, 59.87, 127.71, 128.33, 130.26, 134.72, 173.43. The spectroscopic data are in agreement with that previously reported.<sup>15</sup>

### Radical clock experiment

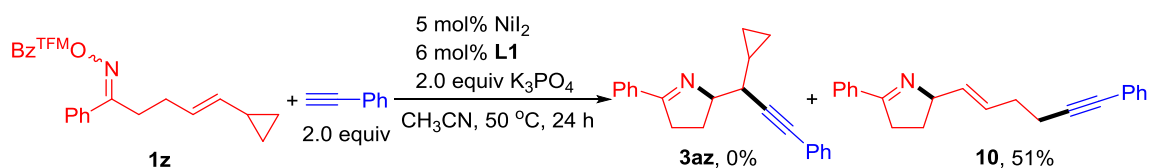

In a nitrogen-filled glovebox, NiI<sub>2</sub> (0.015 mmol, 4.7 mg), **L1** (0.018 mmol, 7.2 mg), anhydrous K<sub>3</sub>PO<sub>4</sub> (0.6 mmol, 127.4 mg) and acetonitrile (3.0 mL) were successively added to an oven-dried sealable Schlenk tube (15.0 mL). The mixture was stirred at room temperature for 5 min. Then oxime ester **1z** (0.3 mmol, 136.6 mg) and phenylacetylene (0.6 mmol, 61.3 mg) were added in sequence. The tube was securely sealed with parafilm, taken outside the glovebox and immersed into an oil bath preheated at 50 °C. After stirring for 24 h, the reaction mixture was cooled to room temperature and quenched with water.

The organic phase was extracted with ethyl acetate. The combined organic layers were washed with water and brine, and dried over anhydrous Na<sub>2</sub>SO<sub>4</sub>. The resulting solution was concentrated under vacuum and the residue was purified by column chromatography on silica gel (eluent: petroleum ether: ethyl acetate = 25:1) to afford the ring-opened product **10** in 51% yield (46.2 mg) as a yellow oil, while the normal cross-coupling product **3az** was not observed. *This result further supports that a radical pathway might be involved in this process, and it is probably generated through an iminyl radical triggered 5-exo-trig cyclization of  $\gamma,\delta$ -unsaturated oxime esters.*

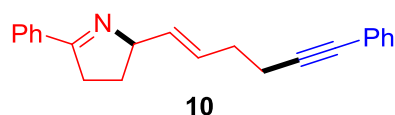

**(E)-5-Phenyl-2-(6-phenylhex-1-en-5-yn-1-yl)-3,4-dihydro-2H-pyrrole (10).** <sup>1</sup>H NMR (400 MHz, CDCl<sub>3</sub>):  $\delta$  1.71-1.80 (m, 1H), 2.23-2.32 (m, 1H), 2.34-2.39 (m, 2H), 2.48-2.52 (m, 2H), 2.83-2.92 (m, 1H), 2.99-3.08 (m, 1H), 4.69-4.74 (m, 1H), 5.68 (dd,  $J = 7.2, 15.2$  Hz, 1H), 5.77-5.84 (m, 1H), 7.23-7.28 (m, 3H), 7.37-7.44 (m, 5H), 7.85-7.88 (m, 2H). <sup>13</sup>C NMR (100 MHz, CDCl<sub>3</sub>):  $\delta$  19.47, 29.63, 31.64, 34.99, 74.24, 80.98, 89.65, 123.88, 127.44, 127.72, 128.09, 128.31, 129.05, 130.41, 131.47, 133.29, 134.40, 173.00. IR (neat): 3103, 3054, 3028, 2967, 2917, 1952, 1895, 1806, 1684, 1607, 1573, 1489, 1443, 1425, 1340, 1259, 1233, 1176, 1071, 1052, 1026, 966, 912, 842, 752, 688, 561, 525, 481, 418 cm<sup>-1</sup>. HRMS (ESI) calcd. for C<sub>22</sub>H<sub>22</sub>N [M+H]<sup>+</sup>: 300.1747, found 300.1747.

## References:

- [1] H.-B. Yang and N. Selander, *Chem. Eur. J.*, 2017, **23**, 1779-1783.
- [2] Z. C. Litman, A. Sharma and J. F. Hartwig, *ACS Catal.*, 2017, **7**, 1998-2001.
- [3] R.-H. Liu, D. Wei, B. Han and W. Yu, *ACS Catal.*, 2016, **6**, 6525-6530.
- [4] A. Faulkner and J. F. Bower, *Angew. Chem. Int. Ed.*, 2012, **51**, 1675-1679.
- [5] J. Davies, N. S. Sheikh and D. Leonori, *Angew. Chem. Int. Ed.*, 2017, **56**, 13361-13365.
- [6] F. Portela-Cubillo, R. Alonso-Ruiz, D. Sampedro and J. C. Walton, *J. Phys. Chem. A*, 2009, **113**, 10005-10012.

- [7] L. Wang and C. Wang, *Org. Chem. Front.*, 2018, **5**, 3476-3482.
- [8] S.-H. Cai, J.-H. Xie, S. Song, L. Ye, C. Feng and T.-P. Loh, *ACS Catal.*, 2016, **6**, 5571-5574.
- [9] X. Shen, C. Huang, X.-A. Yuan and S. Yu, *Angew. Chem. Int. Ed.*, 2021, **60**, 9672-9679.
- [10] H. Ito, T. Kamachi and E. Yashima, *Chem. Commun.*, 2012, **48**, 5650-5652.
- [11] E.-C. Liu and J. J. Topczewski, *J. Am. Chem. Soc.*, 2019, **141**, 5135-5138.
- [12] L. Zhou, S. Li, B. Xu, D. Ji, L. Wu, Y. Liu, Z.-M. Zhang and J. Zhang, *Angew. Chem. Int. Ed.*, 2020, **59**, 2769-2775.
- [13] R. Iwasaki, E. Tanaka, T. Ichihashi, Y. Idemoto and K. Endo, *J. Org. Chem.*, 2018, **83**, 13574-13579.
- [14] M. Hassam and W.-S. Li, *Tetrahedron.*, 2015, **71**, 2719-2723.
- [15] H.-B. Yang, S. R. Pathipati and N. Selander, *ACS Catal.*, 2017, **7**, 8441-8445.

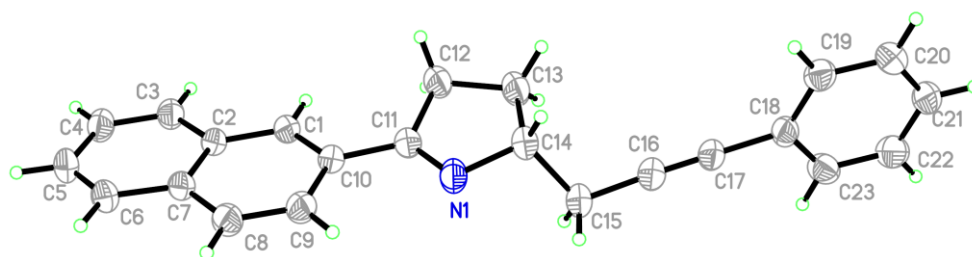

**Figure S1.** X-ray crystal structure of complex **3ac**

# NMR spectra of all new compounds

$^1\text{H}$  NMR(600 MHz,  $\text{CDCl}_3$ )

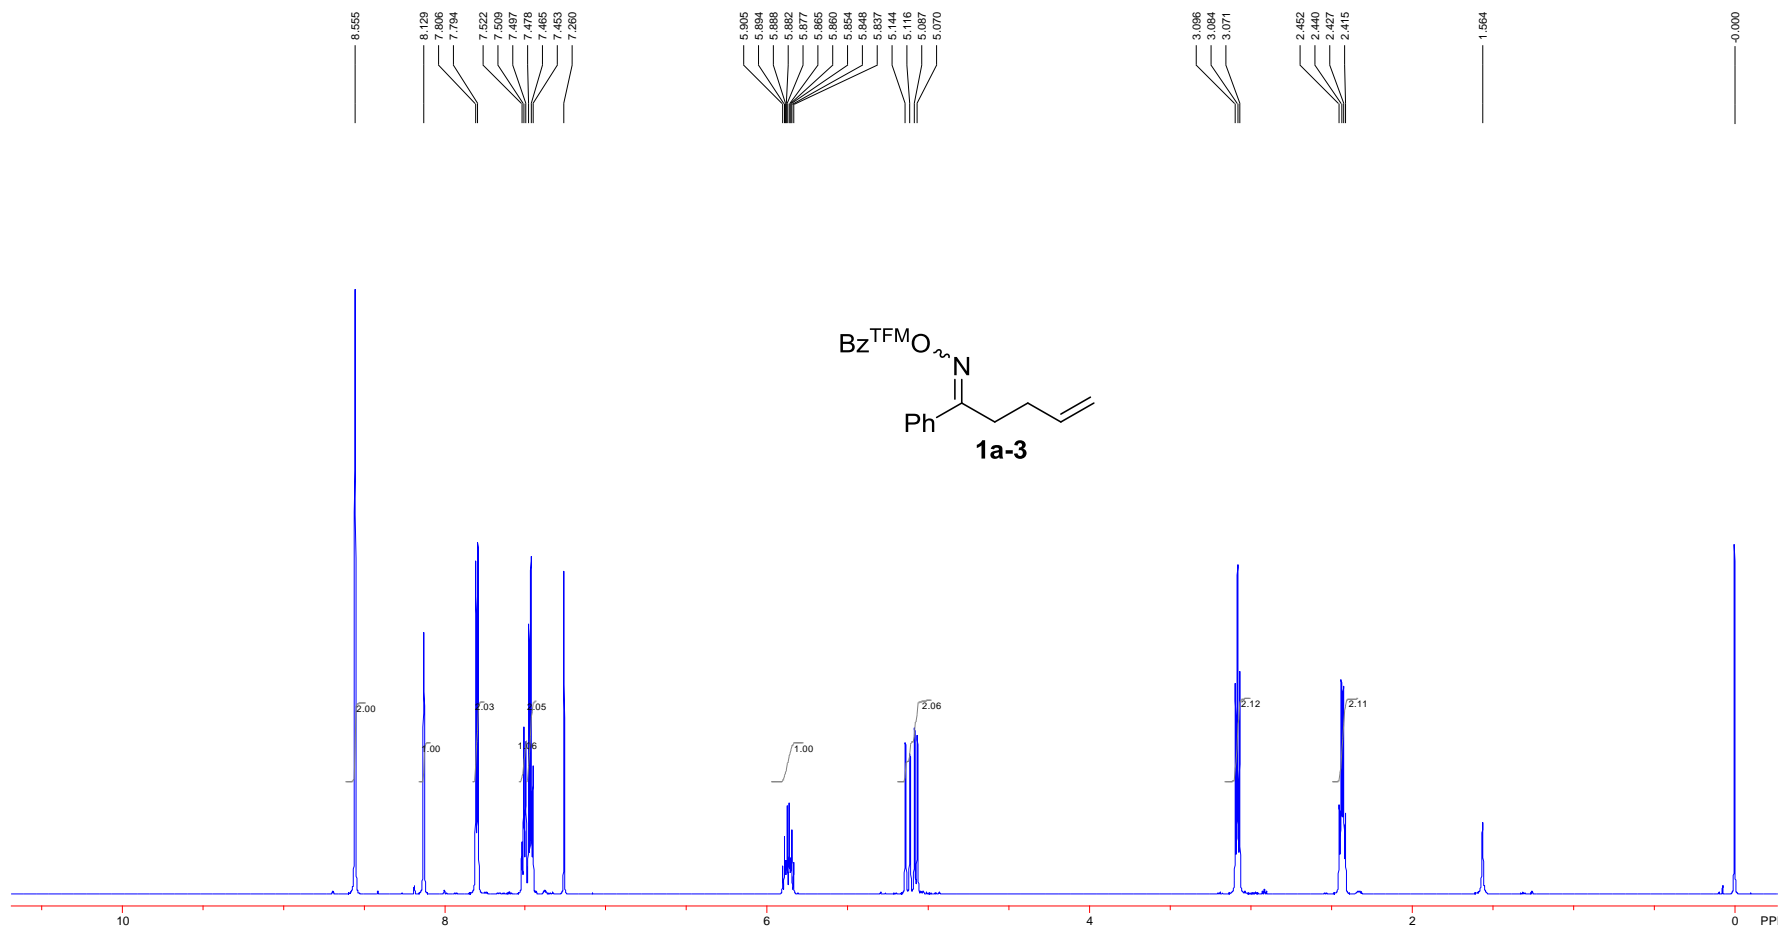

$^{13}\text{C}$  NMR (151 MHz,  $\text{CDCl}_3$ )

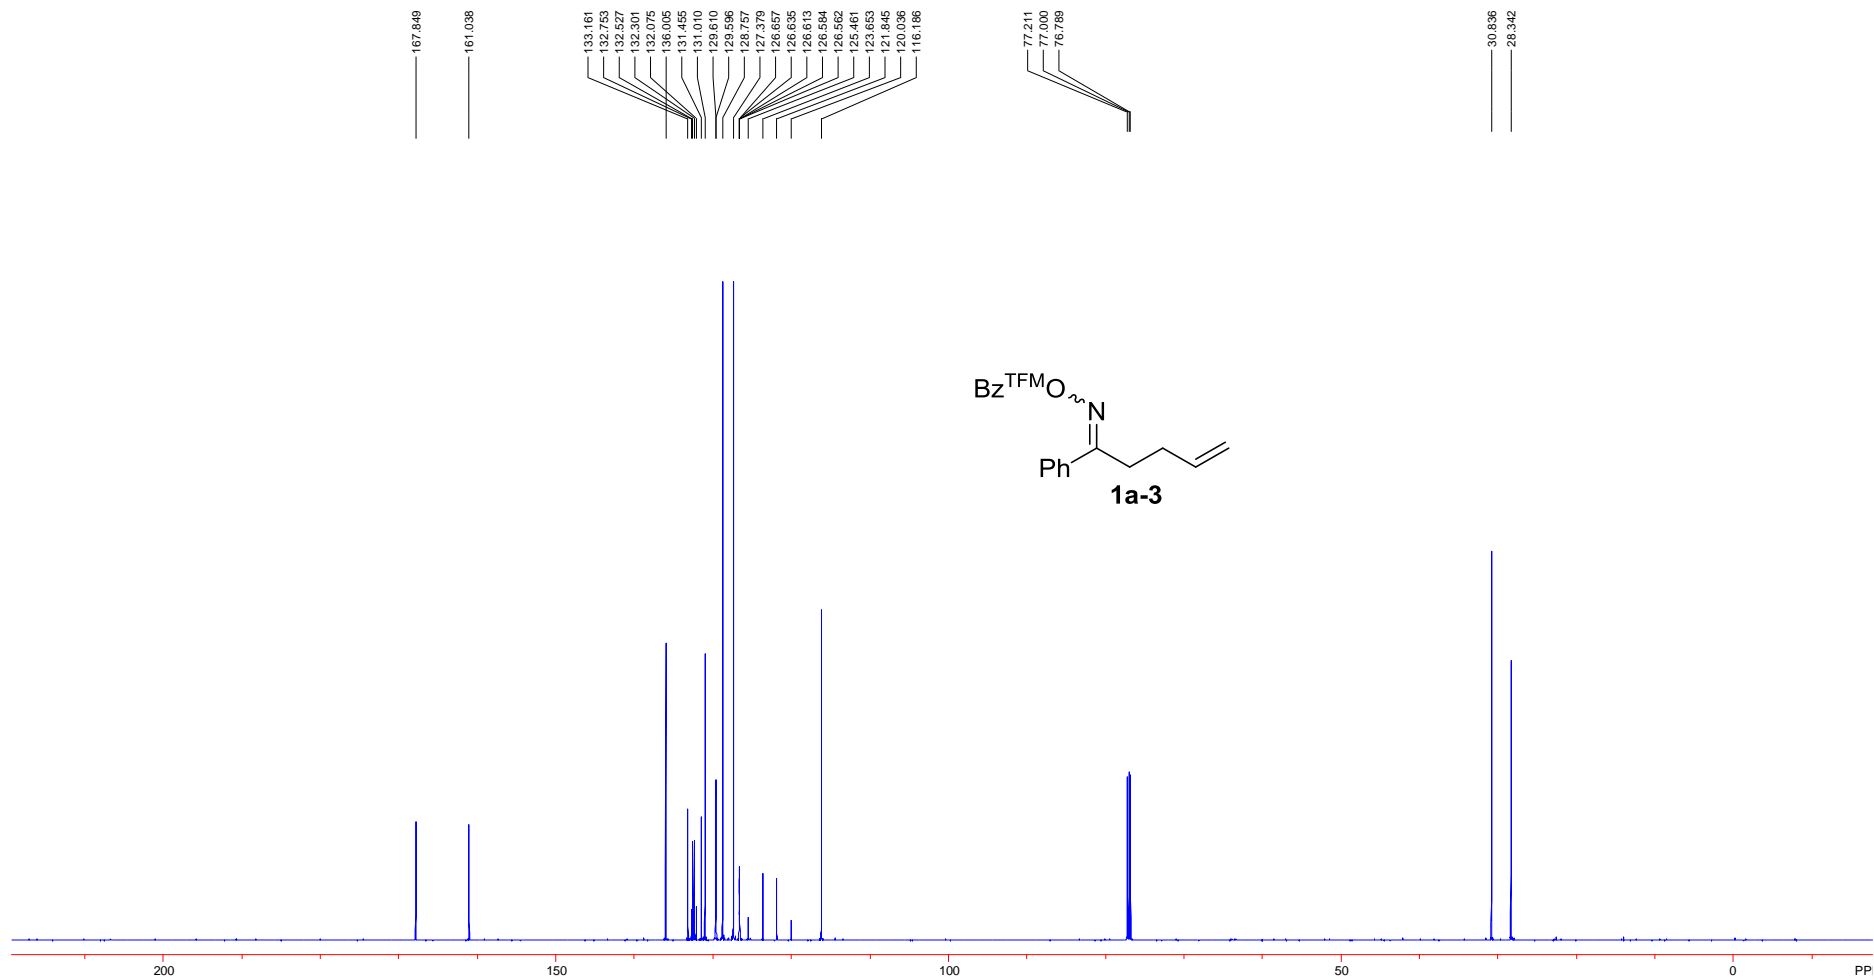

$^1\text{H}$  NMR(600 MHz,  $\text{CDCl}_3$ )

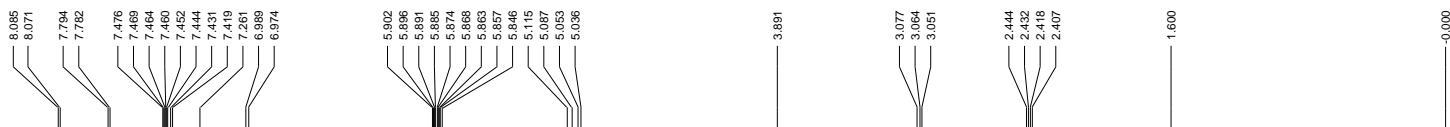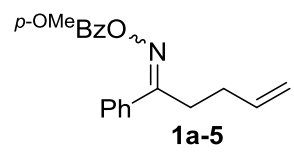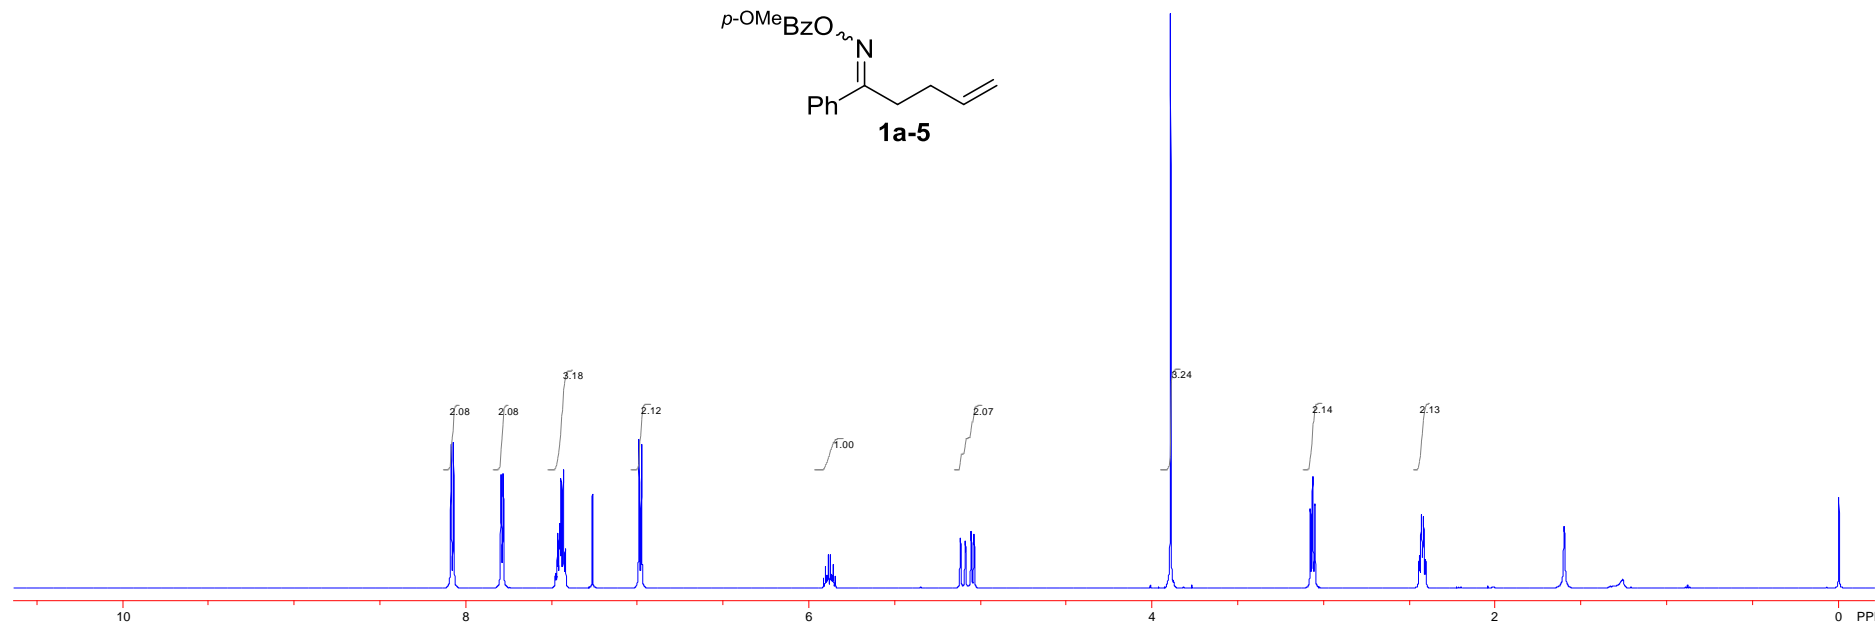

$^{13}\text{C}$  NMR (100 MHz,  $\text{CDCl}_3$ )

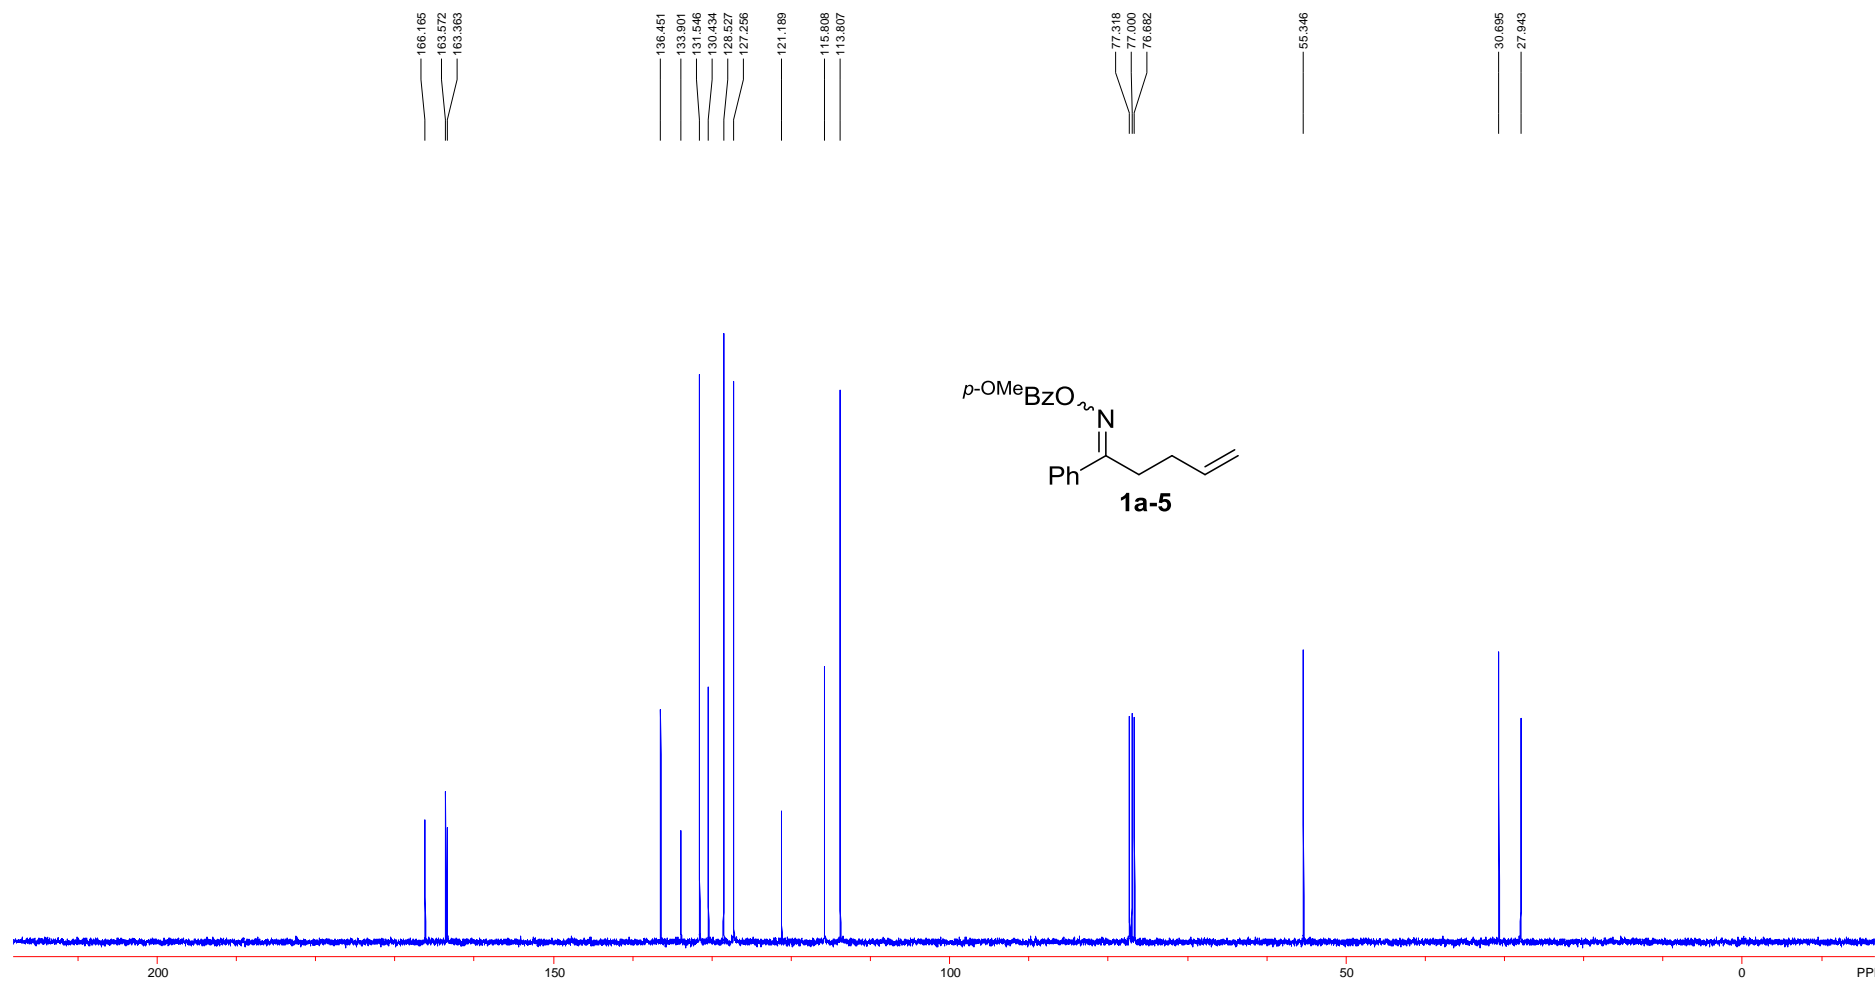

$^1\text{H}$  NMR(400 MHz,  $\text{CDCl}_3$ )

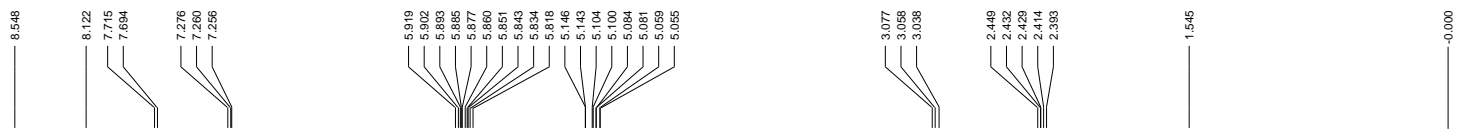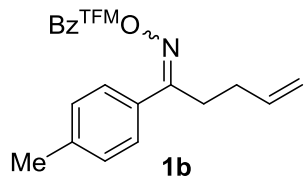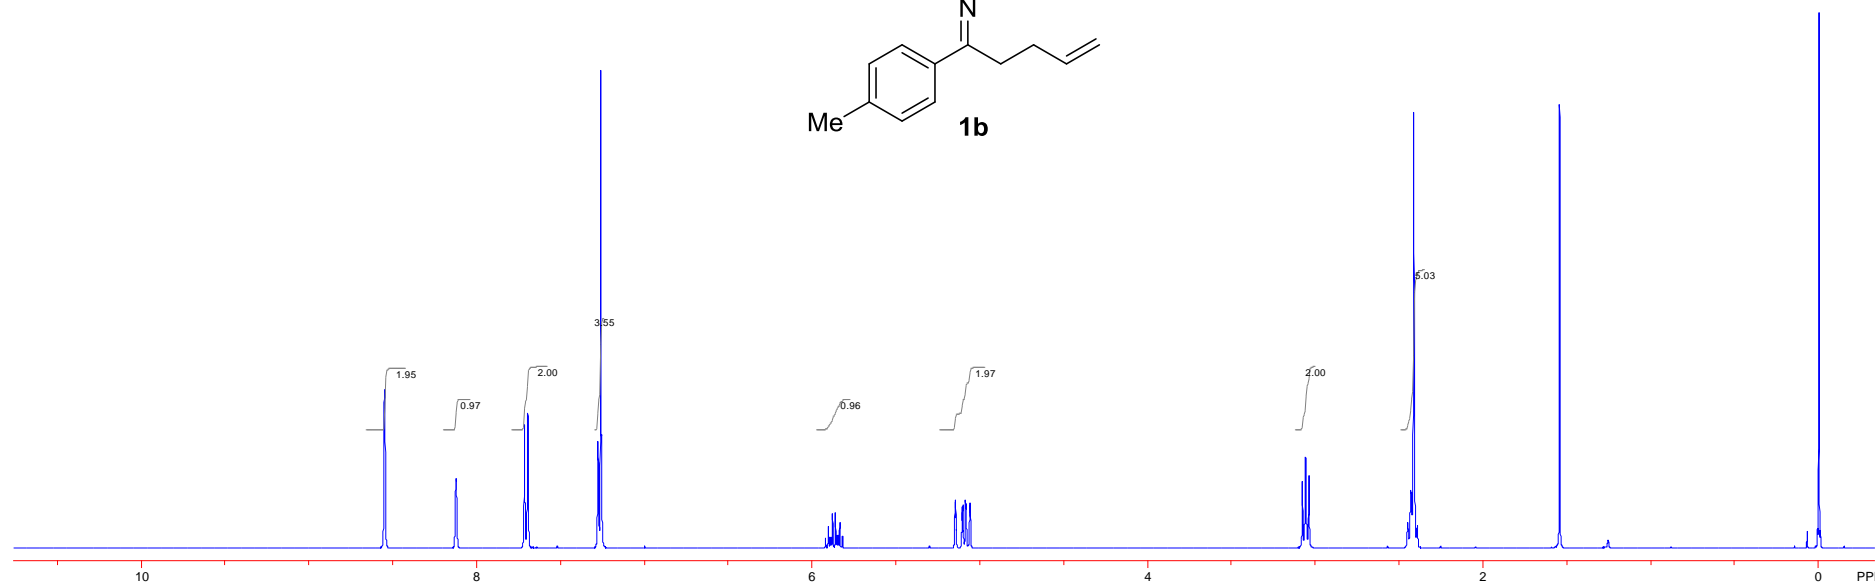



$^{13}\text{C}$  NMR (100 MHz,  $\text{CDCl}_3$ )

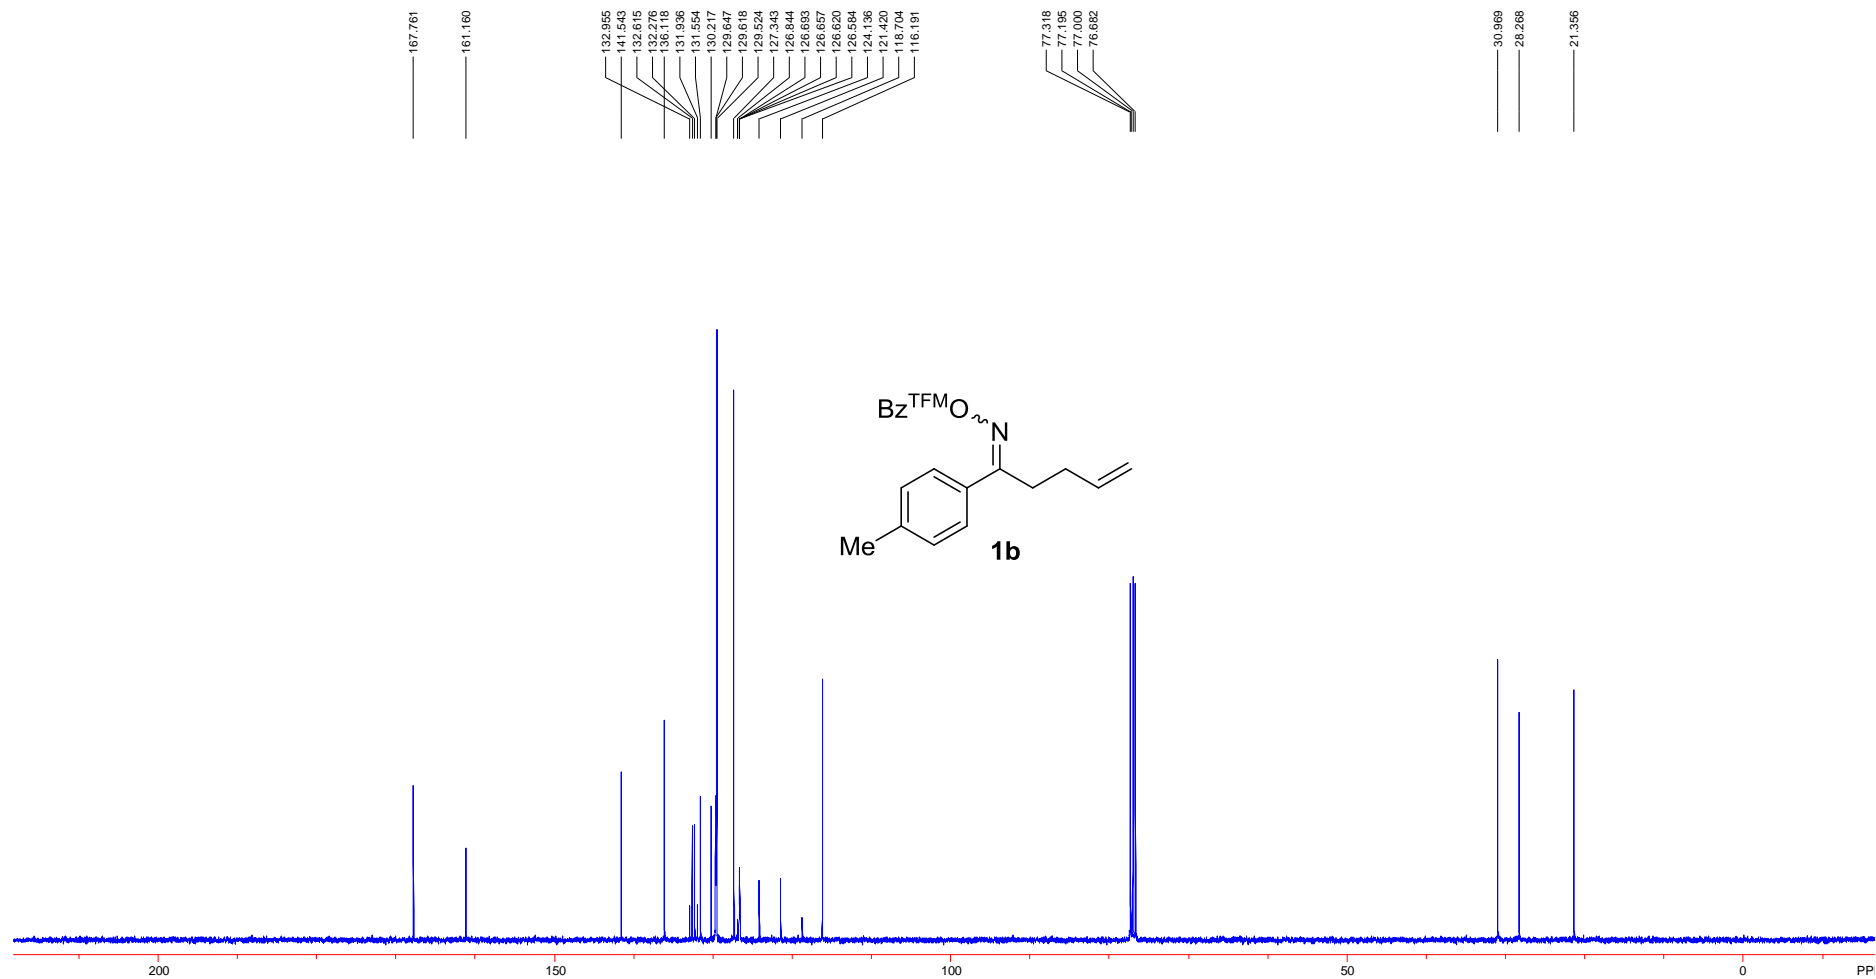

$^1\text{H}$  NMR(400 MHz,  $\text{CDCl}_3$ )

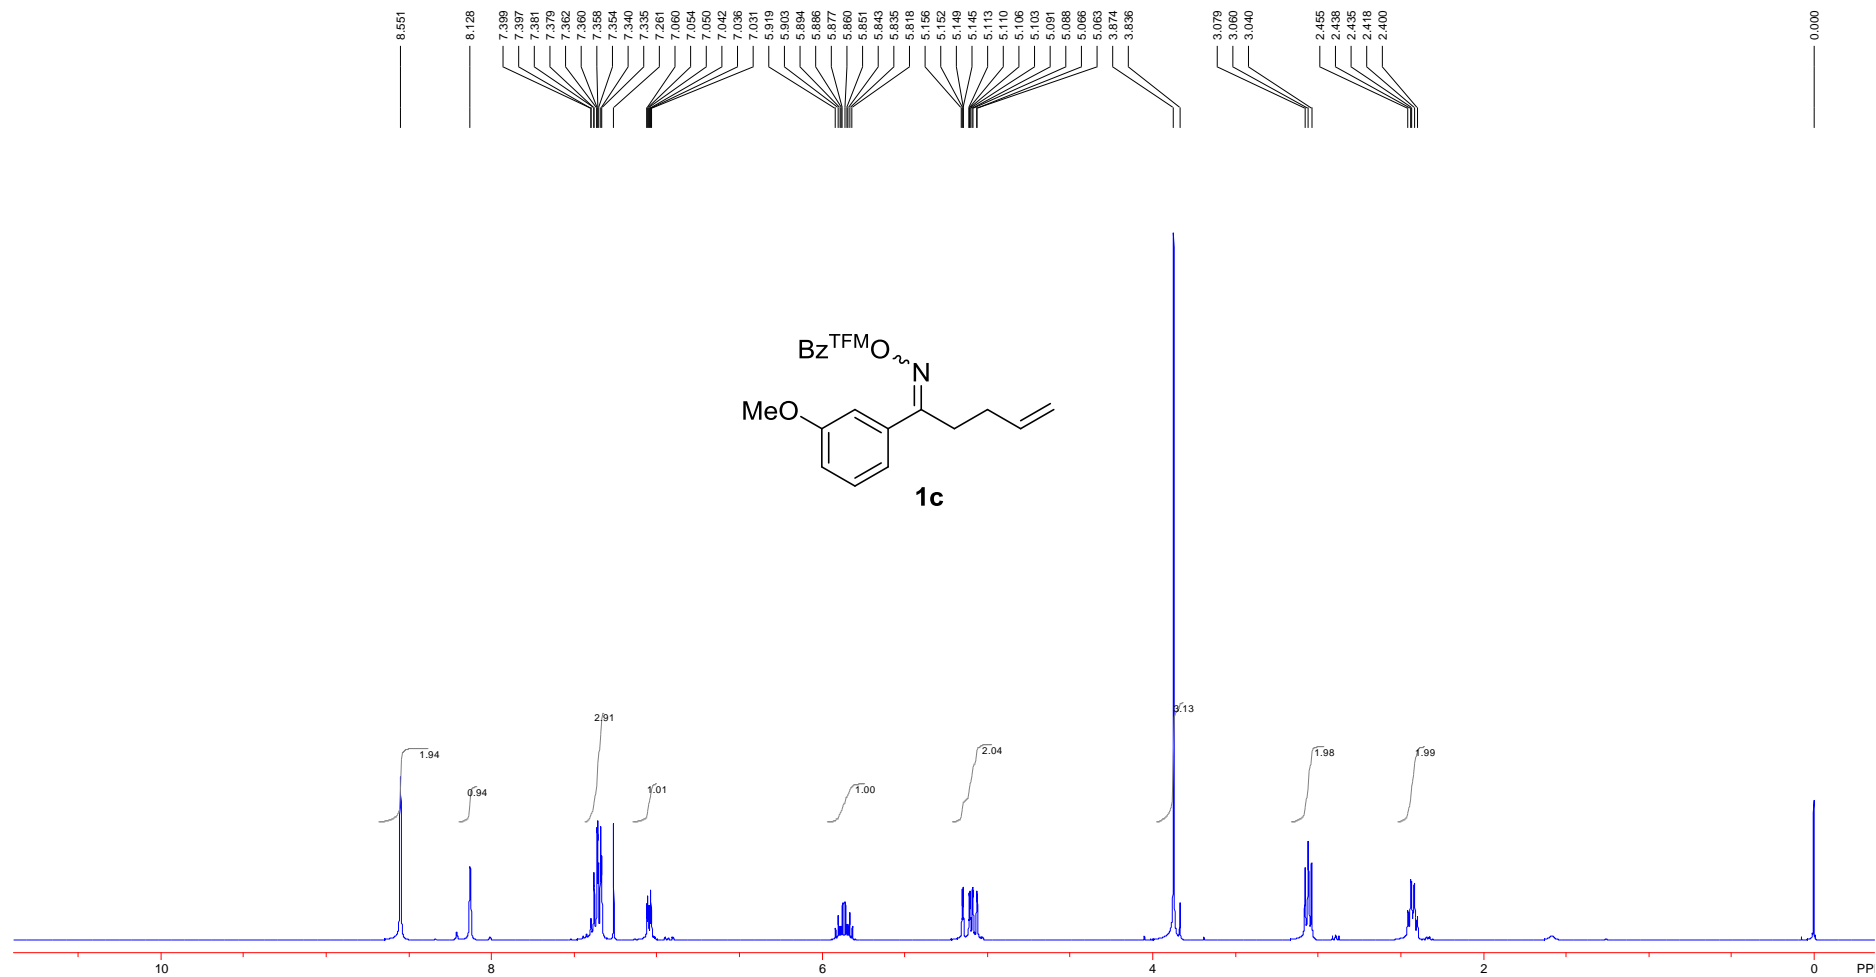

$^{13}\text{C}$  NMR (100 MHz,  $\text{CDCl}_3$ )

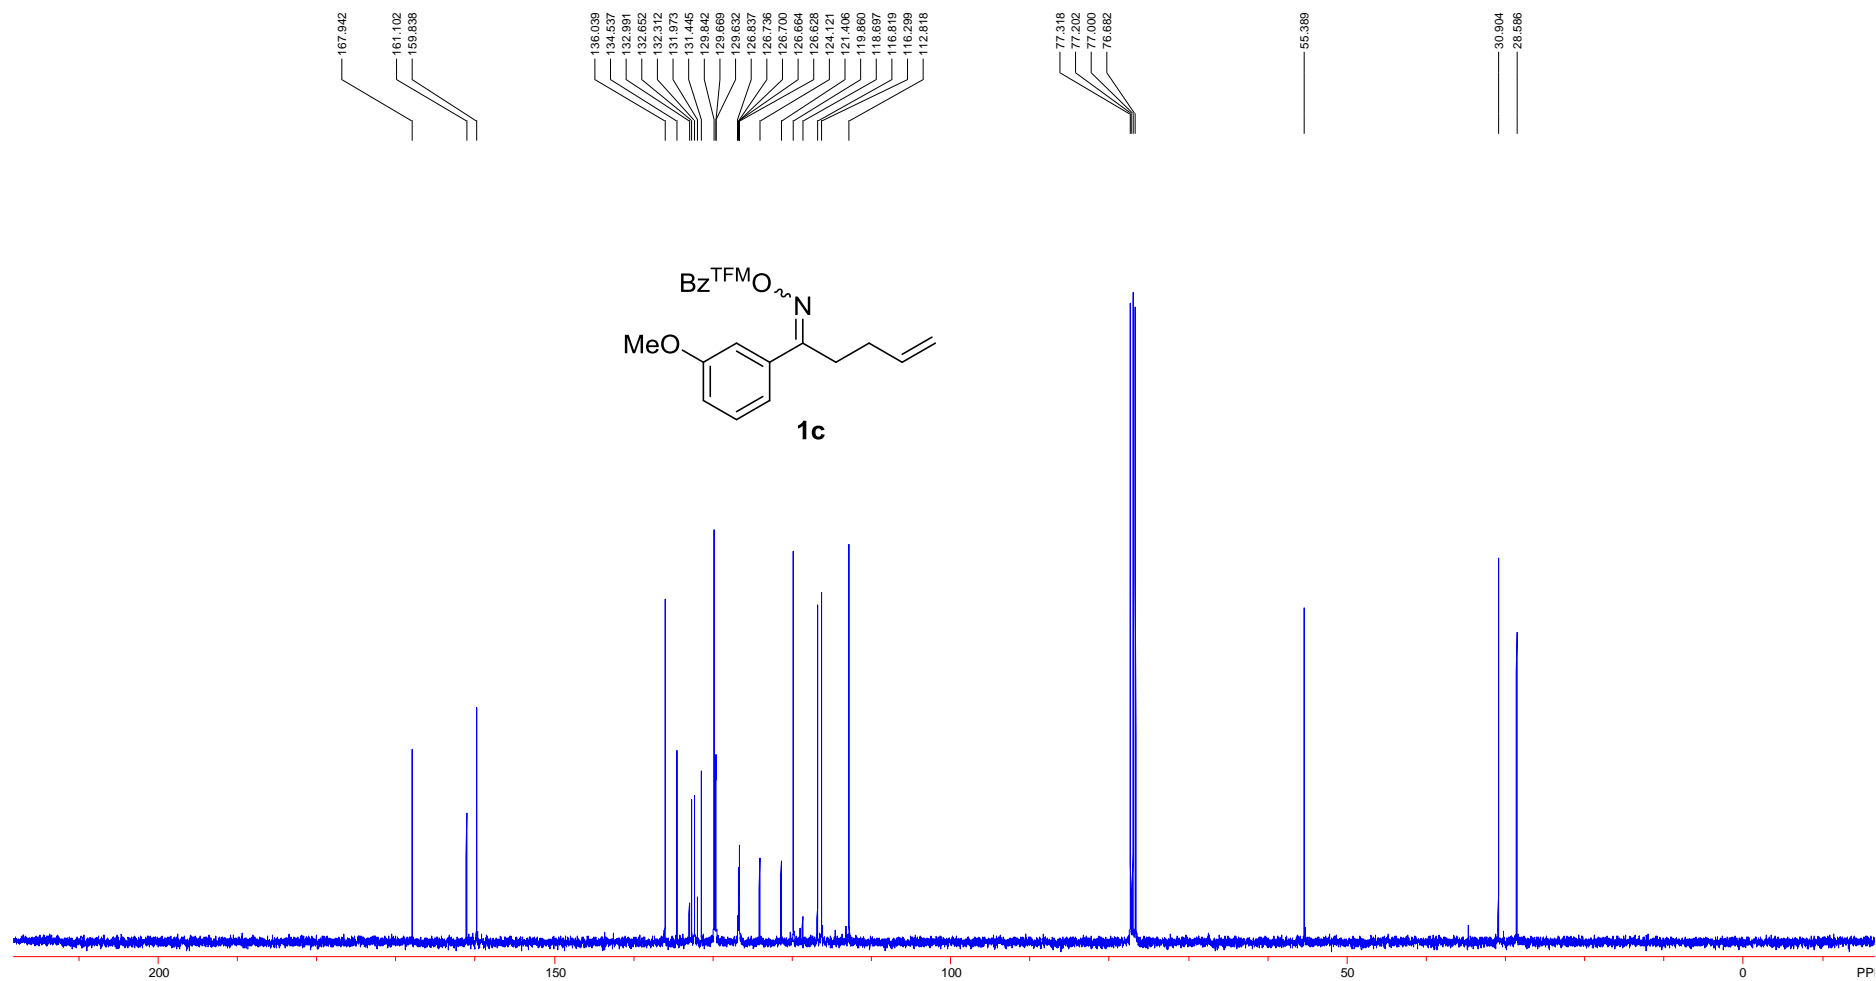

$^1\text{H}$  NMR(400 MHz,  $\text{CDCl}_3$ )

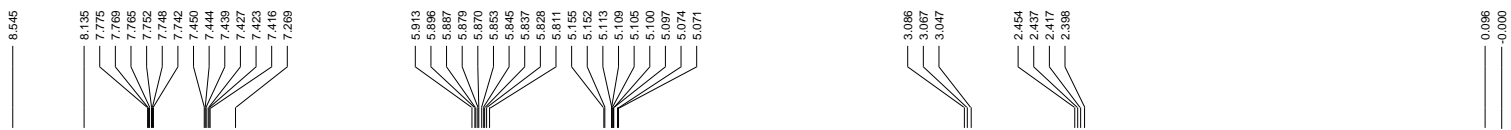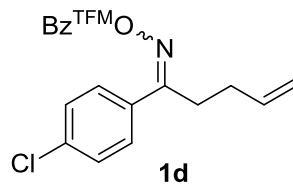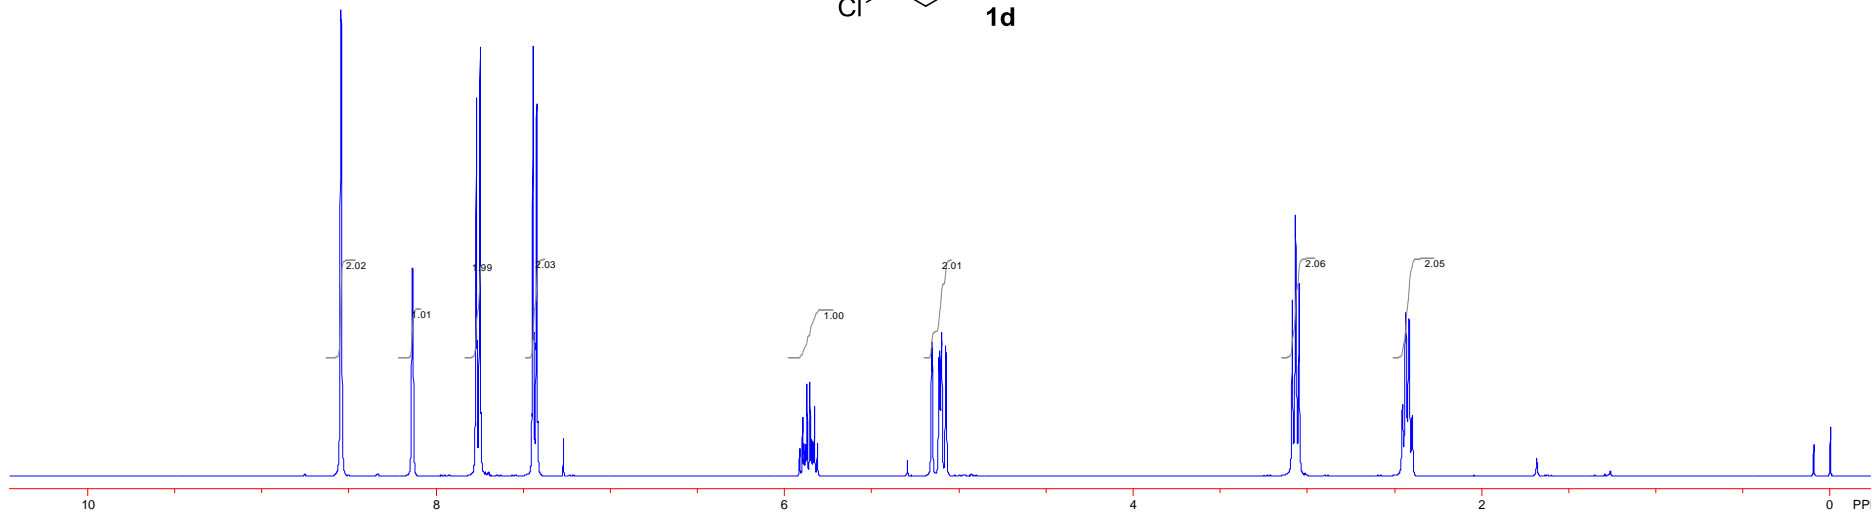

$^{13}\text{C}$  NMR (100 MHz,  $\text{CDCl}_3$ )

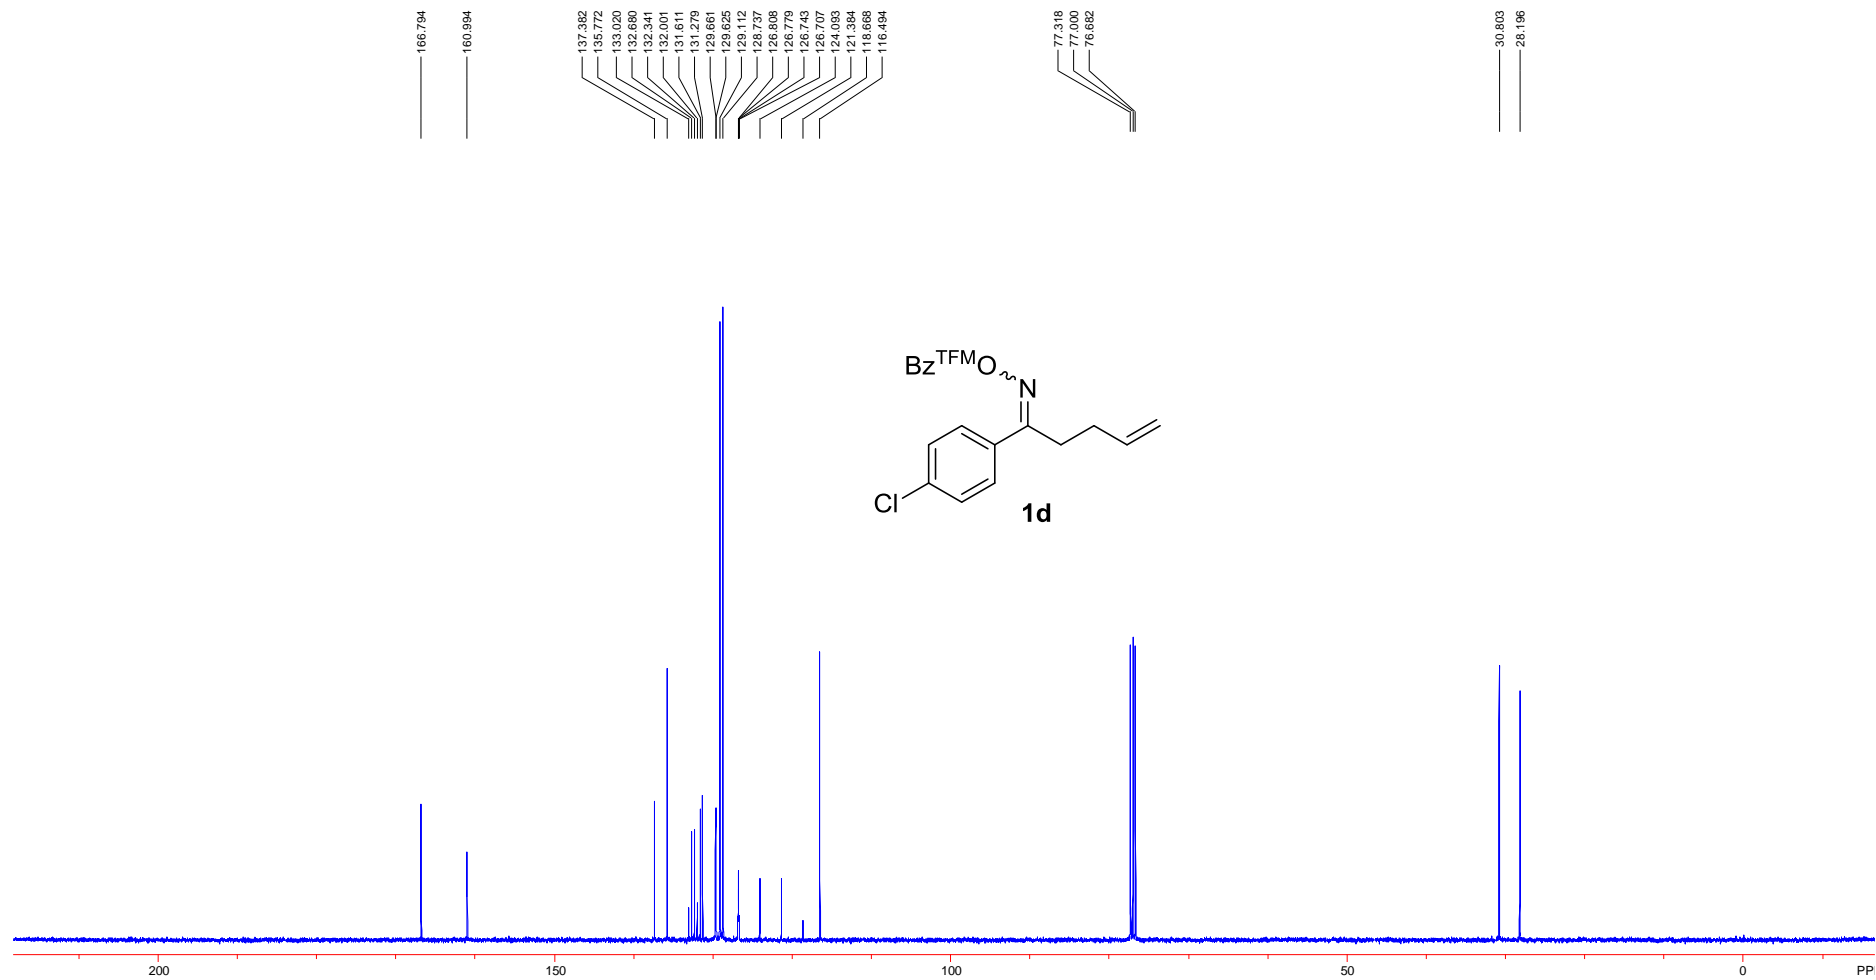

$^1\text{H}$  NMR(400 MHz,  $\text{CDCl}_3$ )

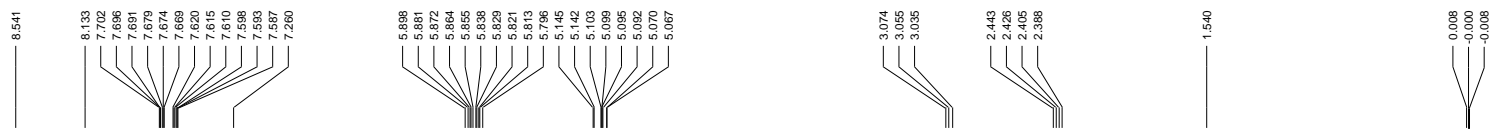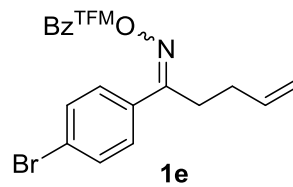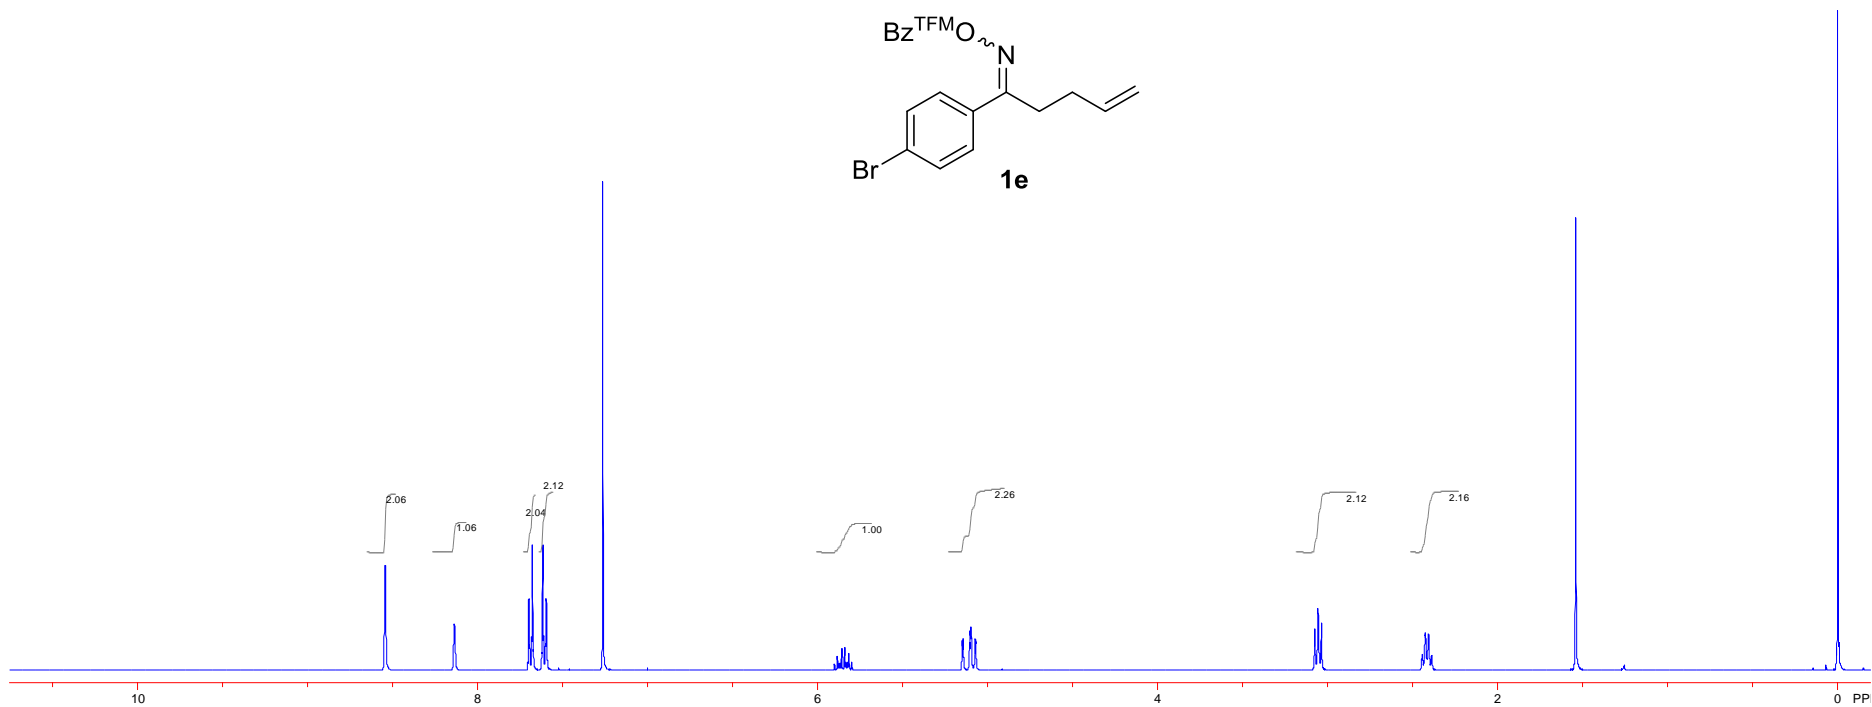

$^{13}\text{C}$  NMR (100 MHz,  $\text{CDCl}_3$ )

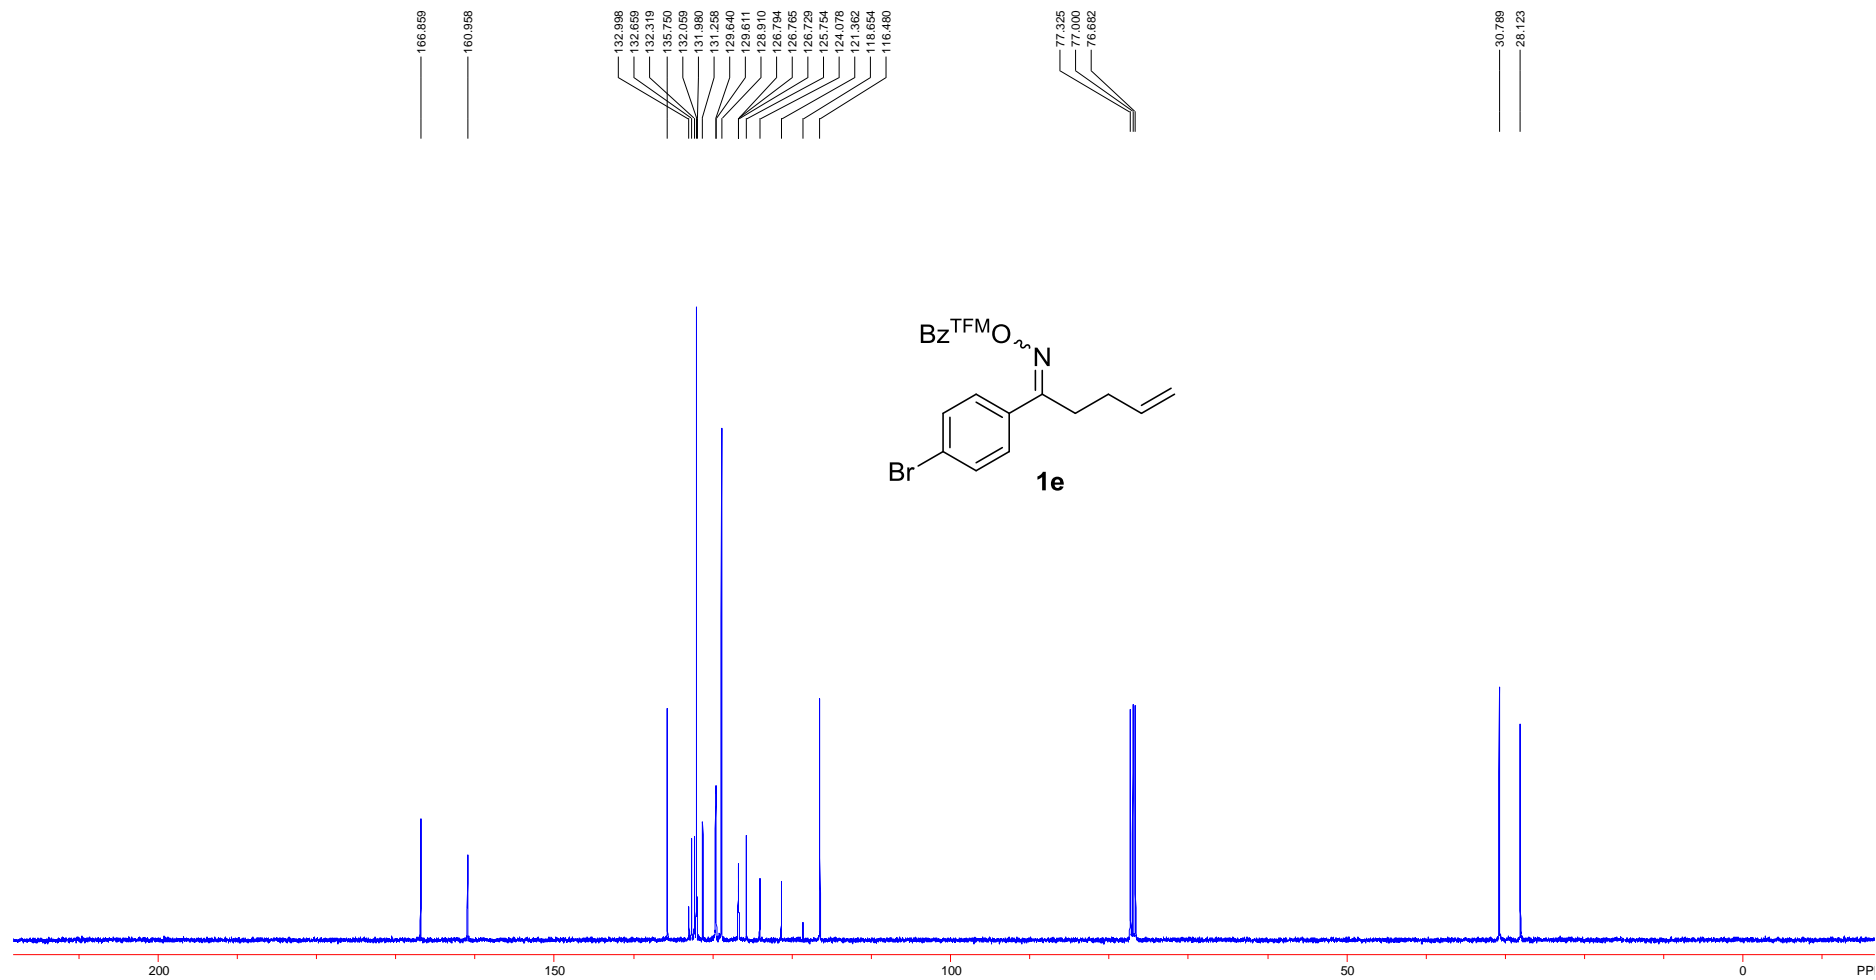

$^1\text{H}$  NMR(400 MHz,  $\text{CDCl}_3$ )

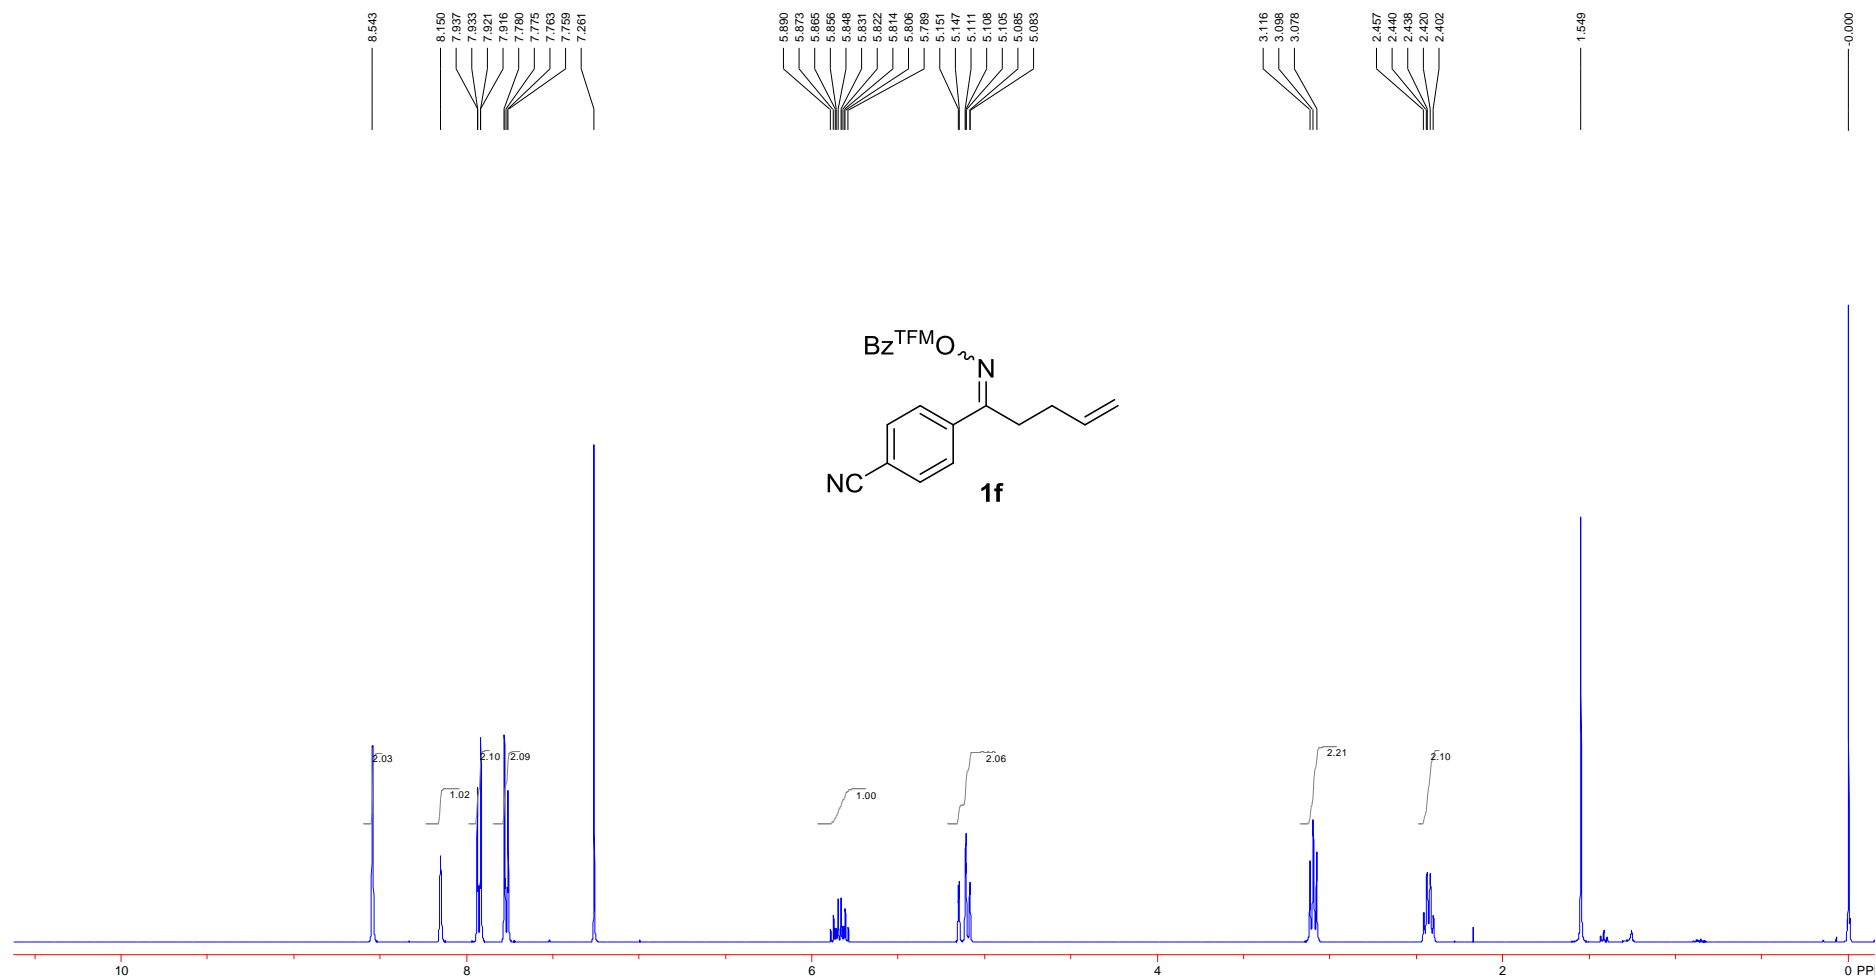



$^{13}\text{C}$  NMR (100 MHz,  $\text{CDCl}_3$ )

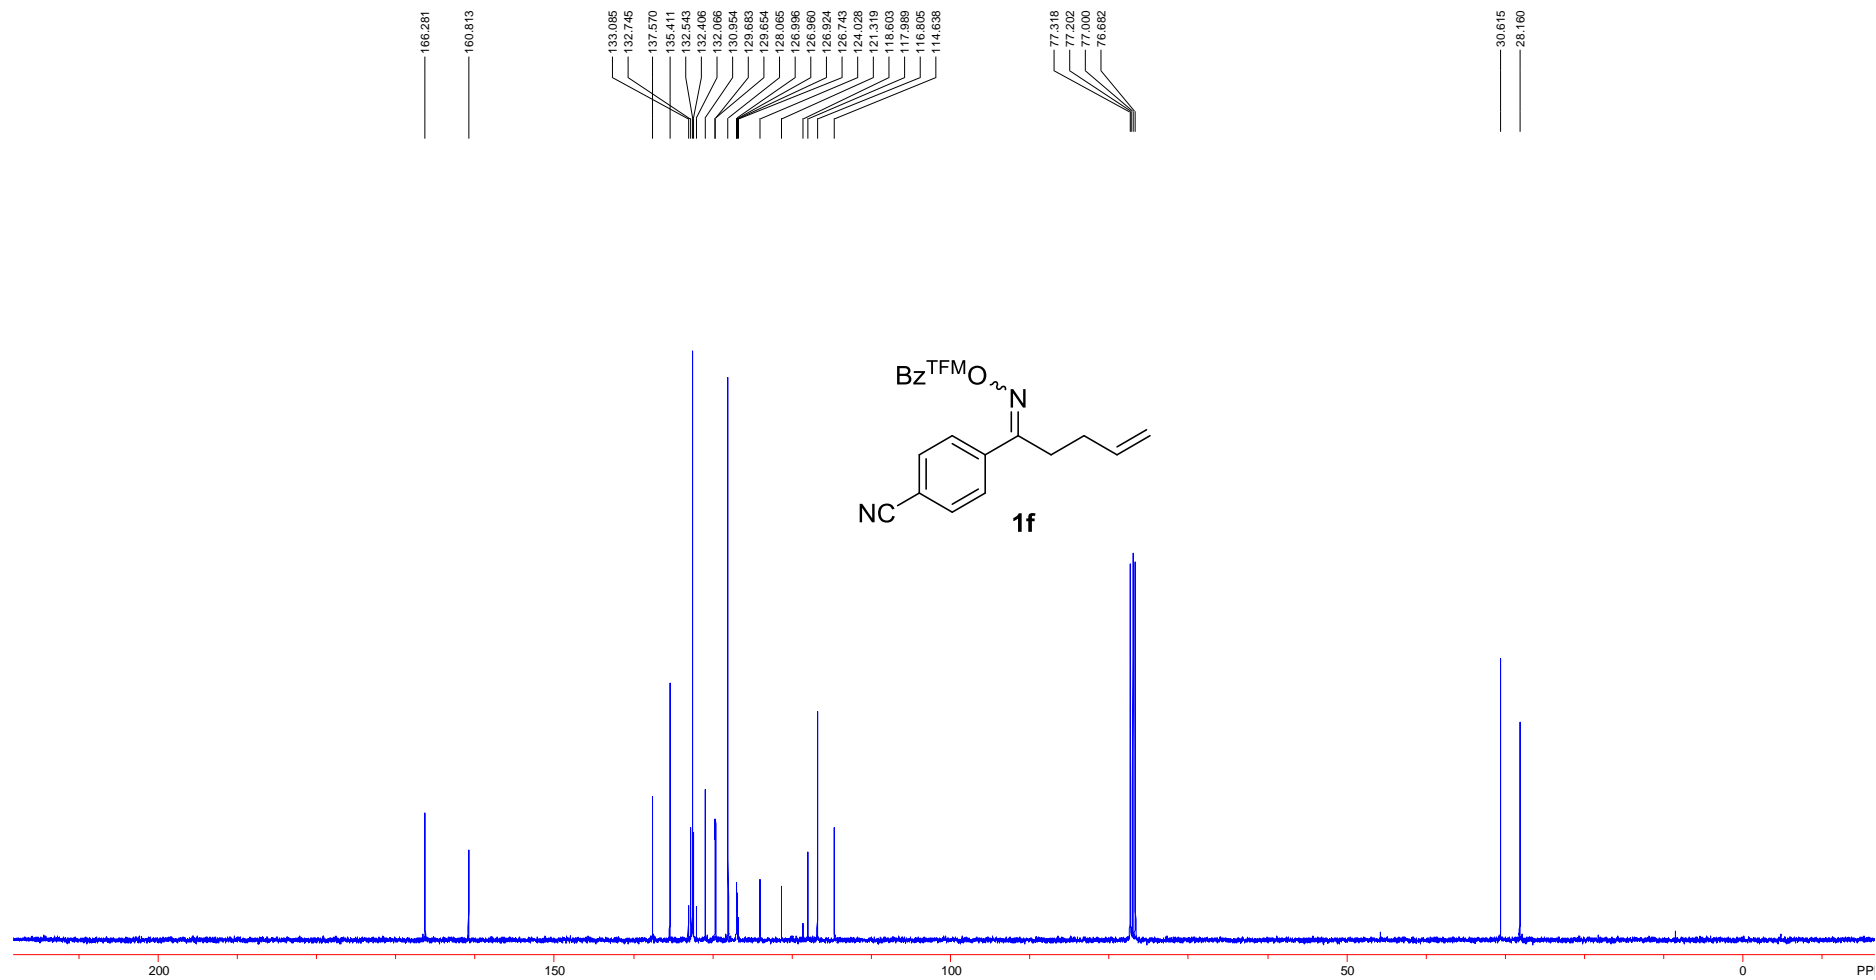

$^1\text{H NMR}$ (400 MHz,  $\text{CDCl}_3$ )

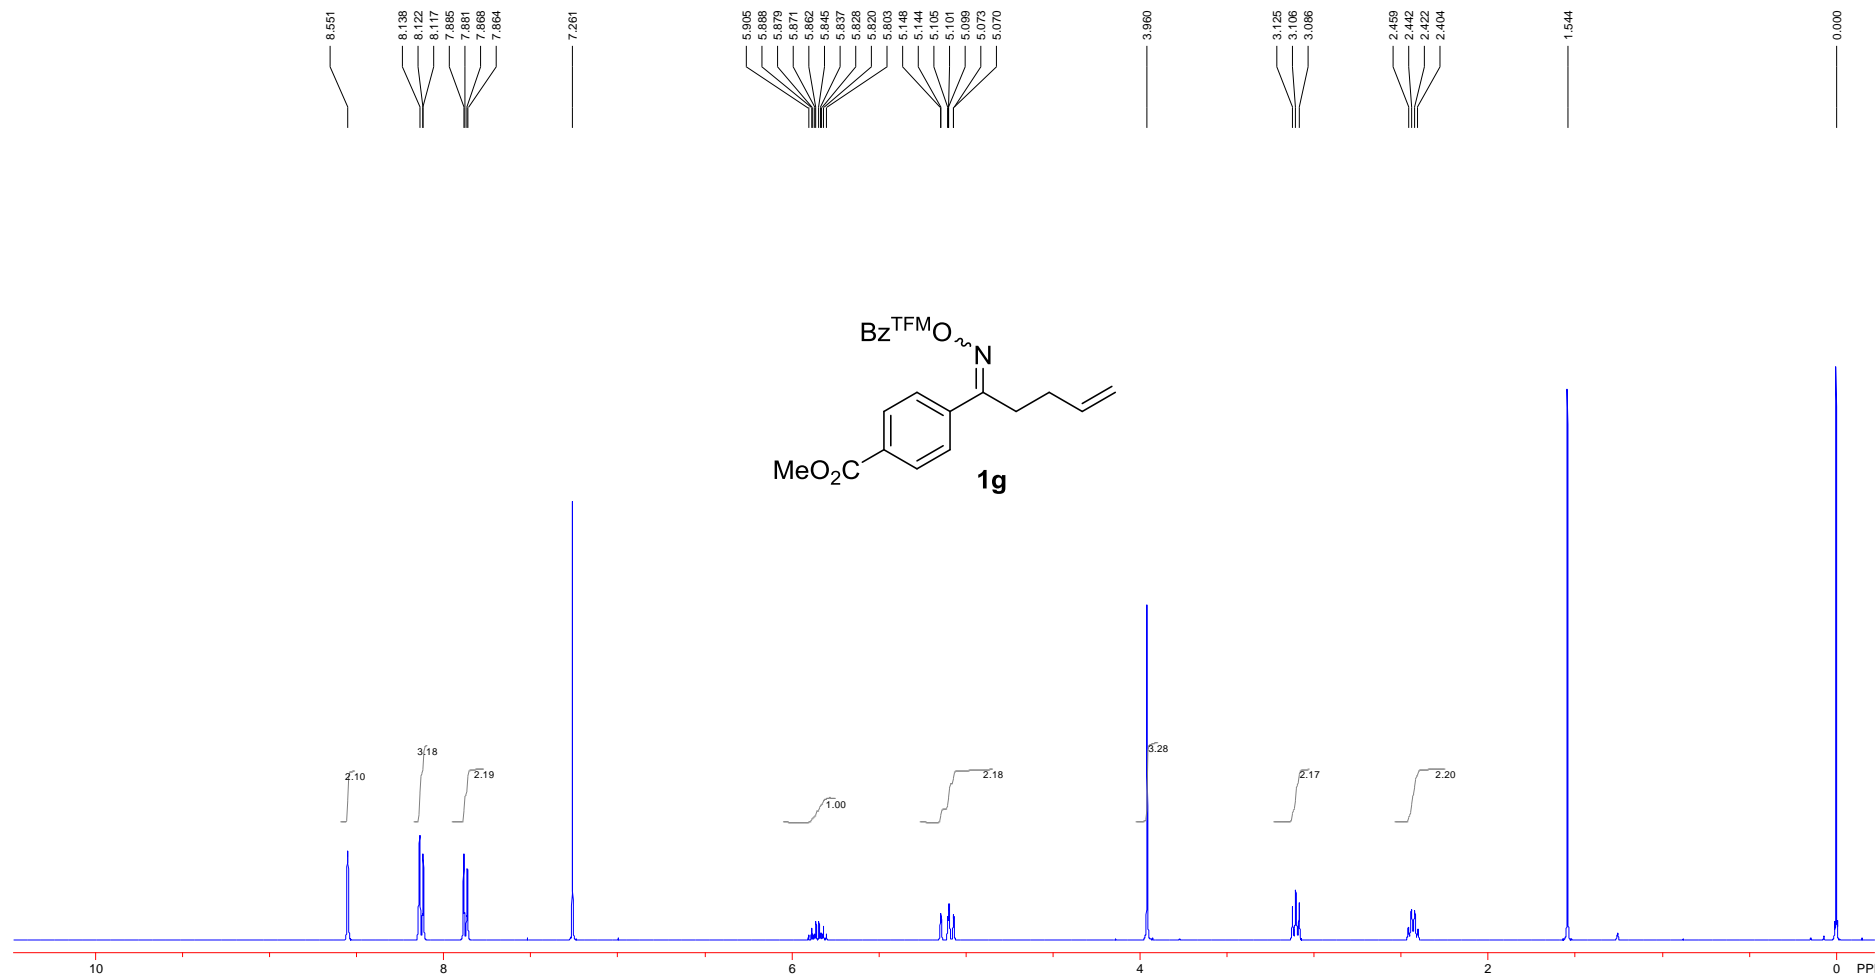

$^{13}\text{C}$  NMR (100 MHz,  $\text{CDCl}_3$ )

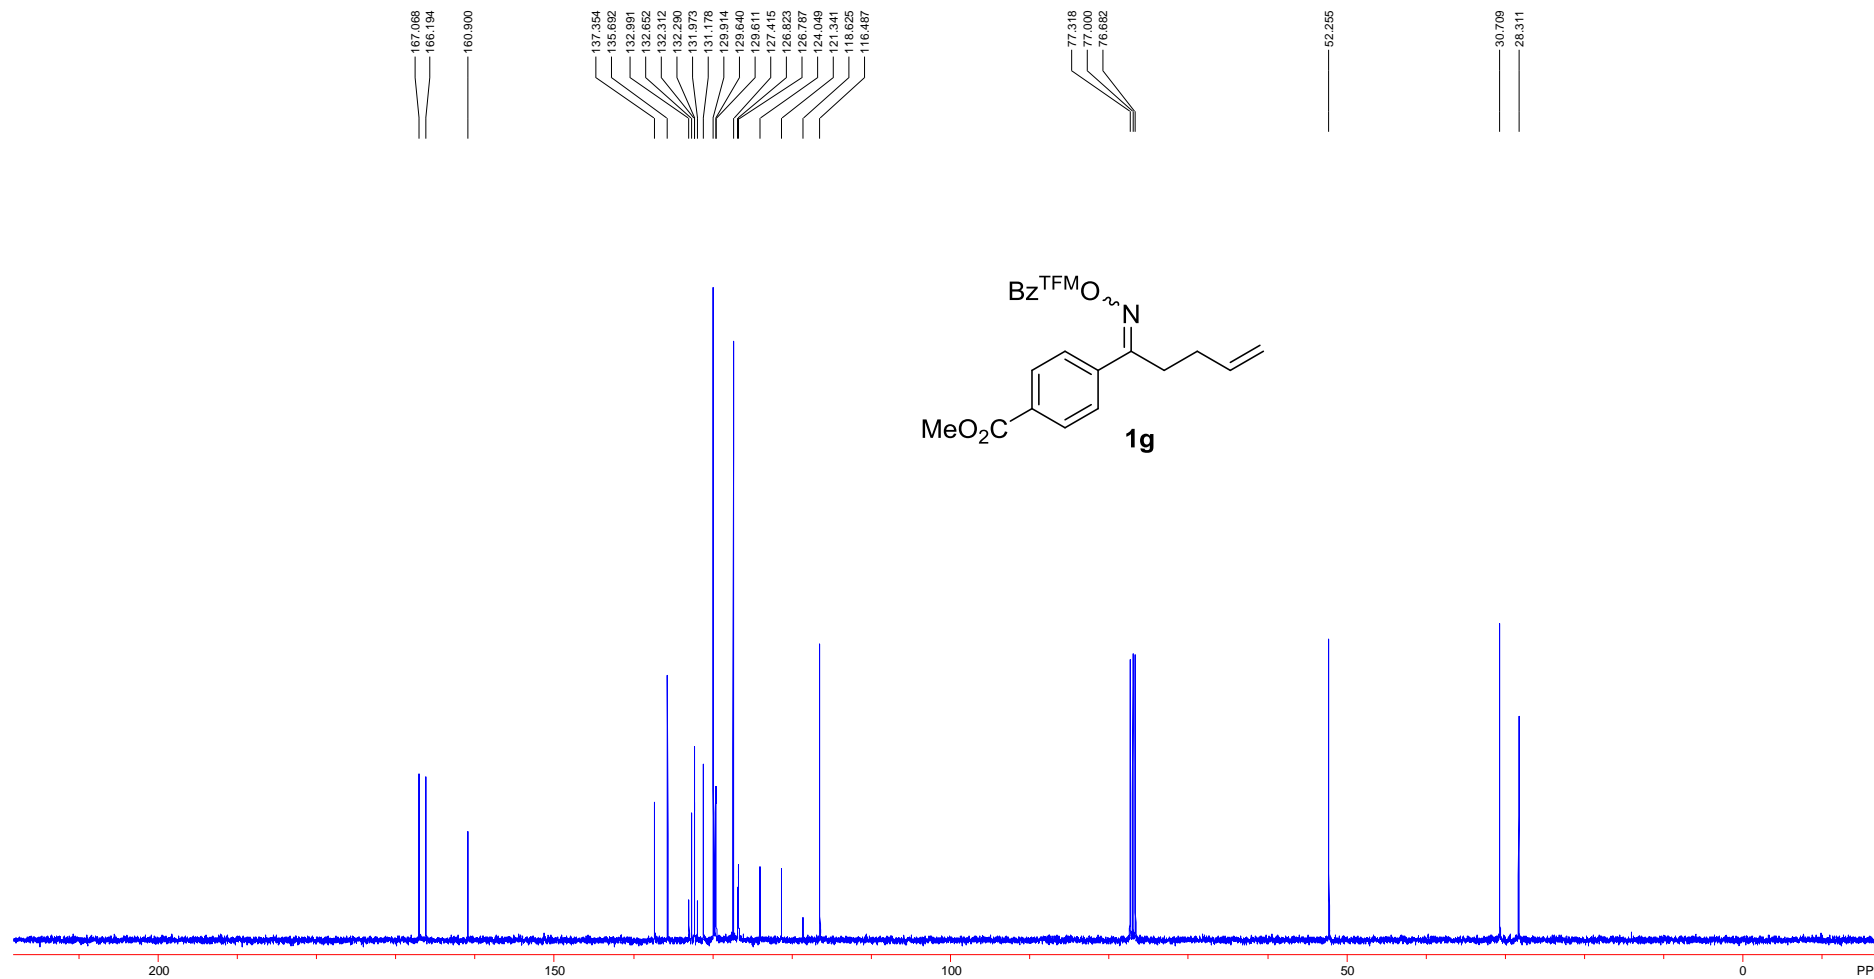

$^1\text{H}$  NMR(600 MHz,  $\text{CDCl}_3$ )

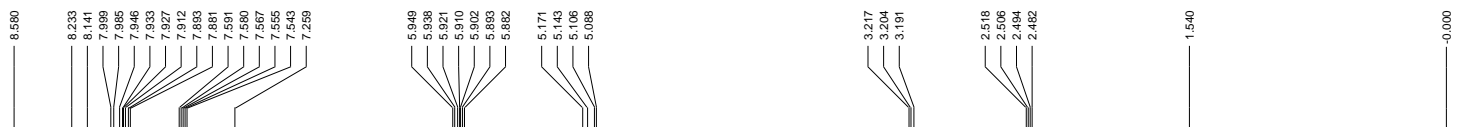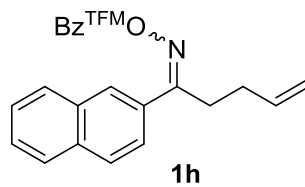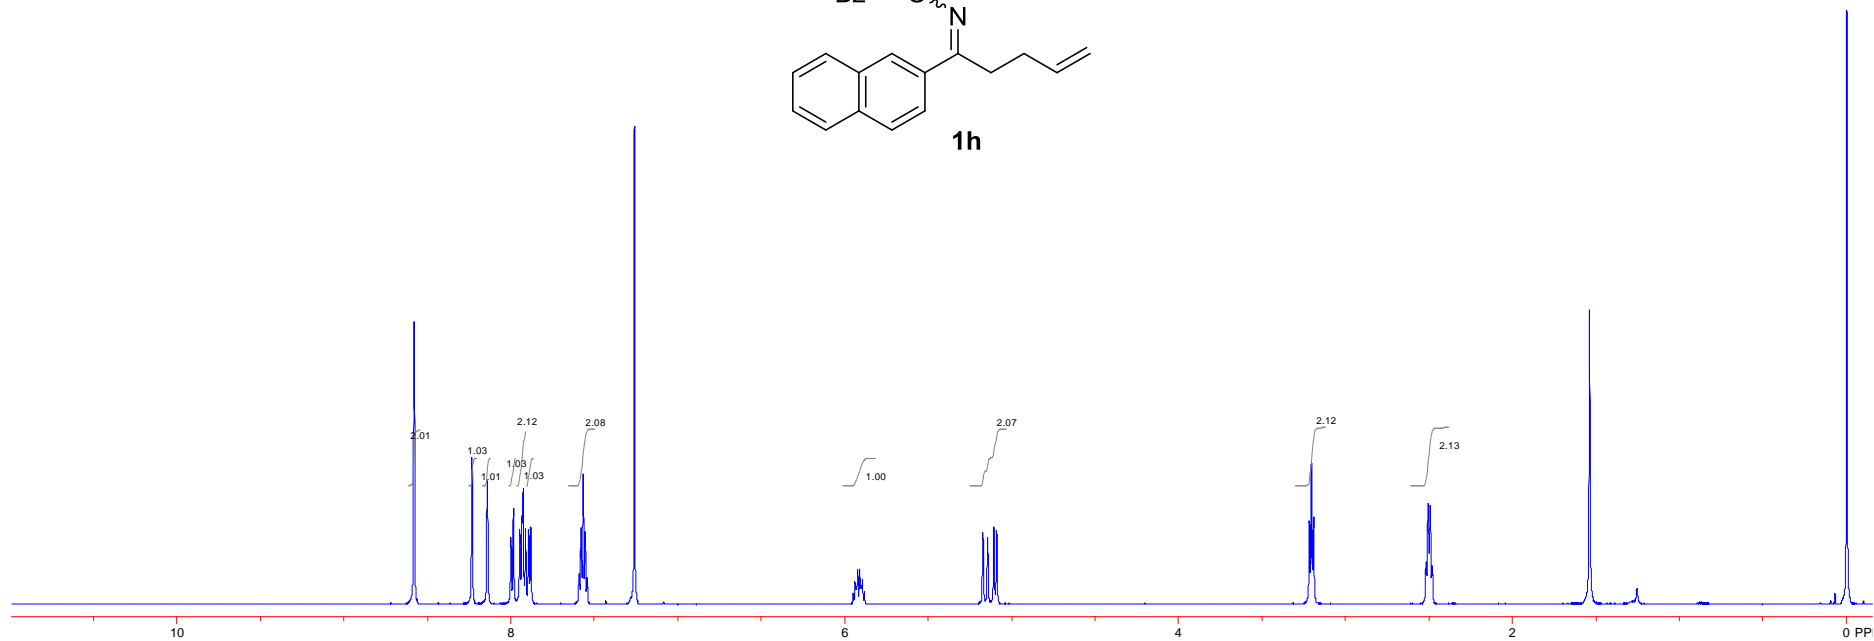

$^{13}\text{C}$  NMR (100 MHz,  $\text{CDCl}_3$ )

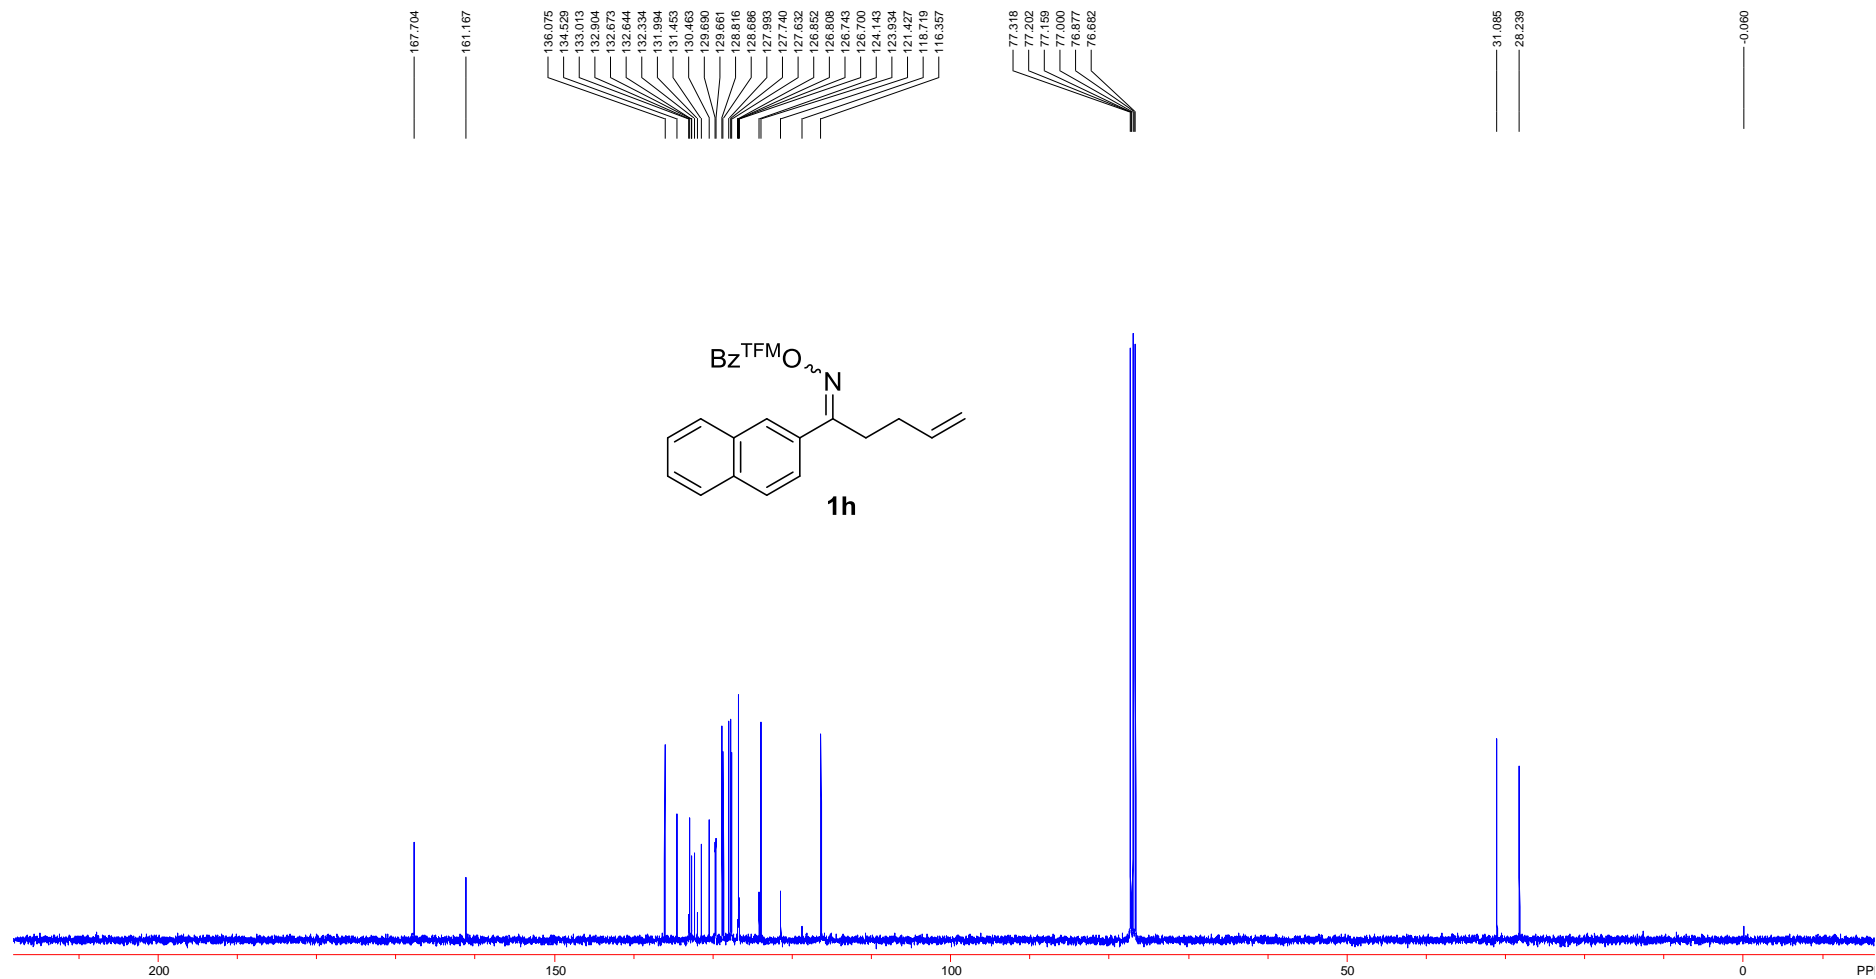

$^1\text{H}$  NMR(400 MHz,  $\text{CDCl}_3$ )

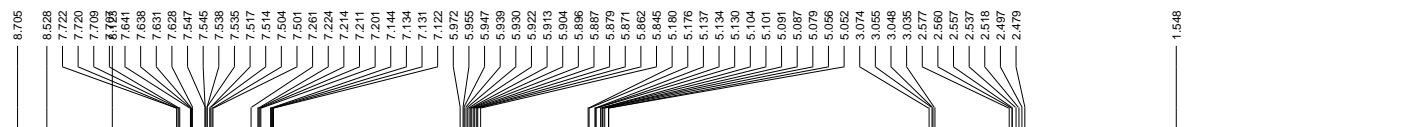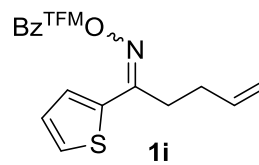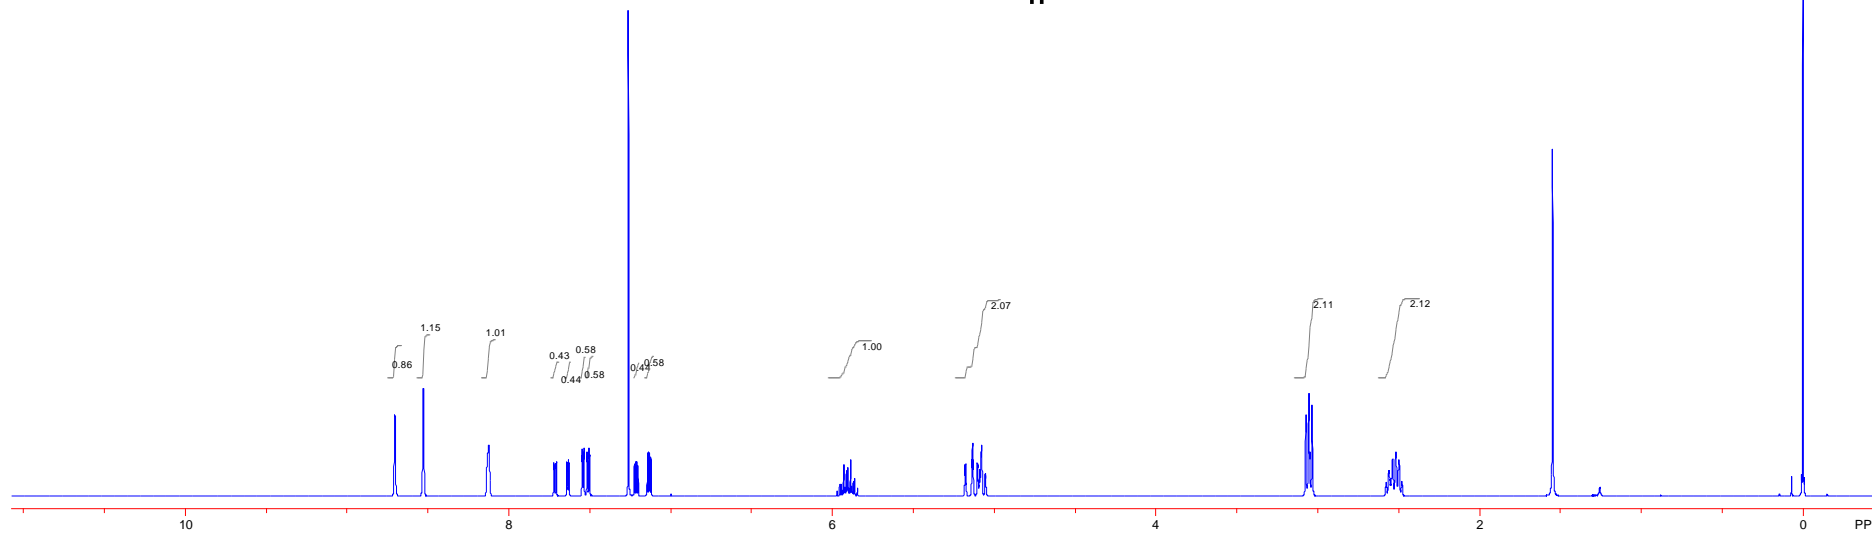

$^{13}\text{C}$  NMR (100 MHz,  $\text{CDCl}_3$ )

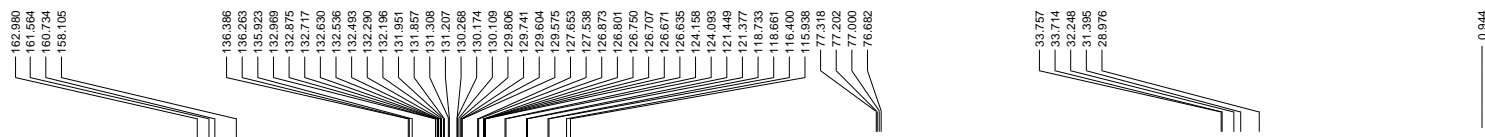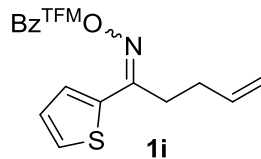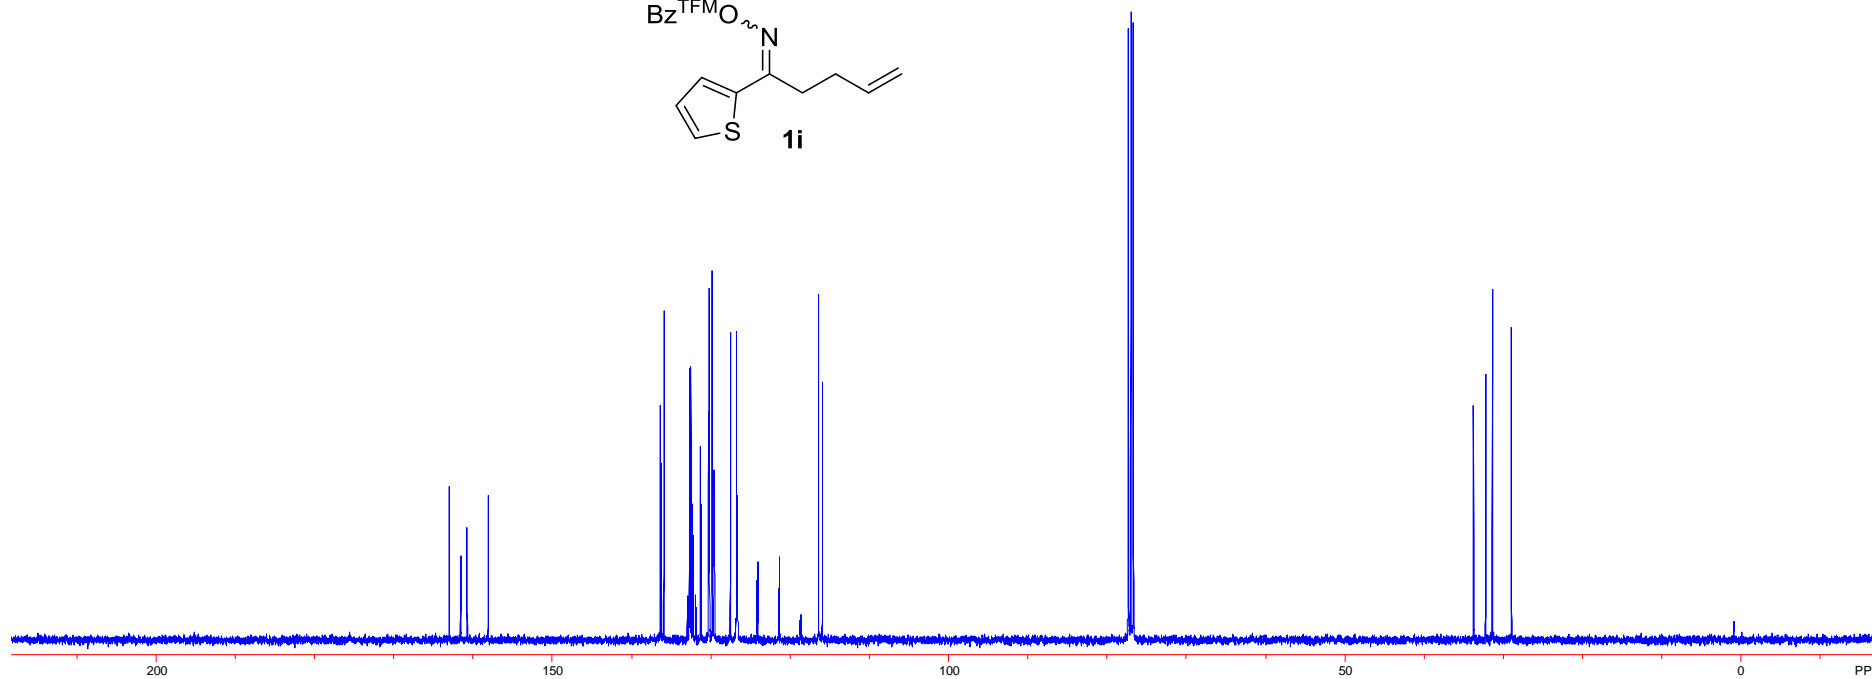

$^1\text{H}$  NMR(400 MHz,  $\text{CDCl}_3$ )

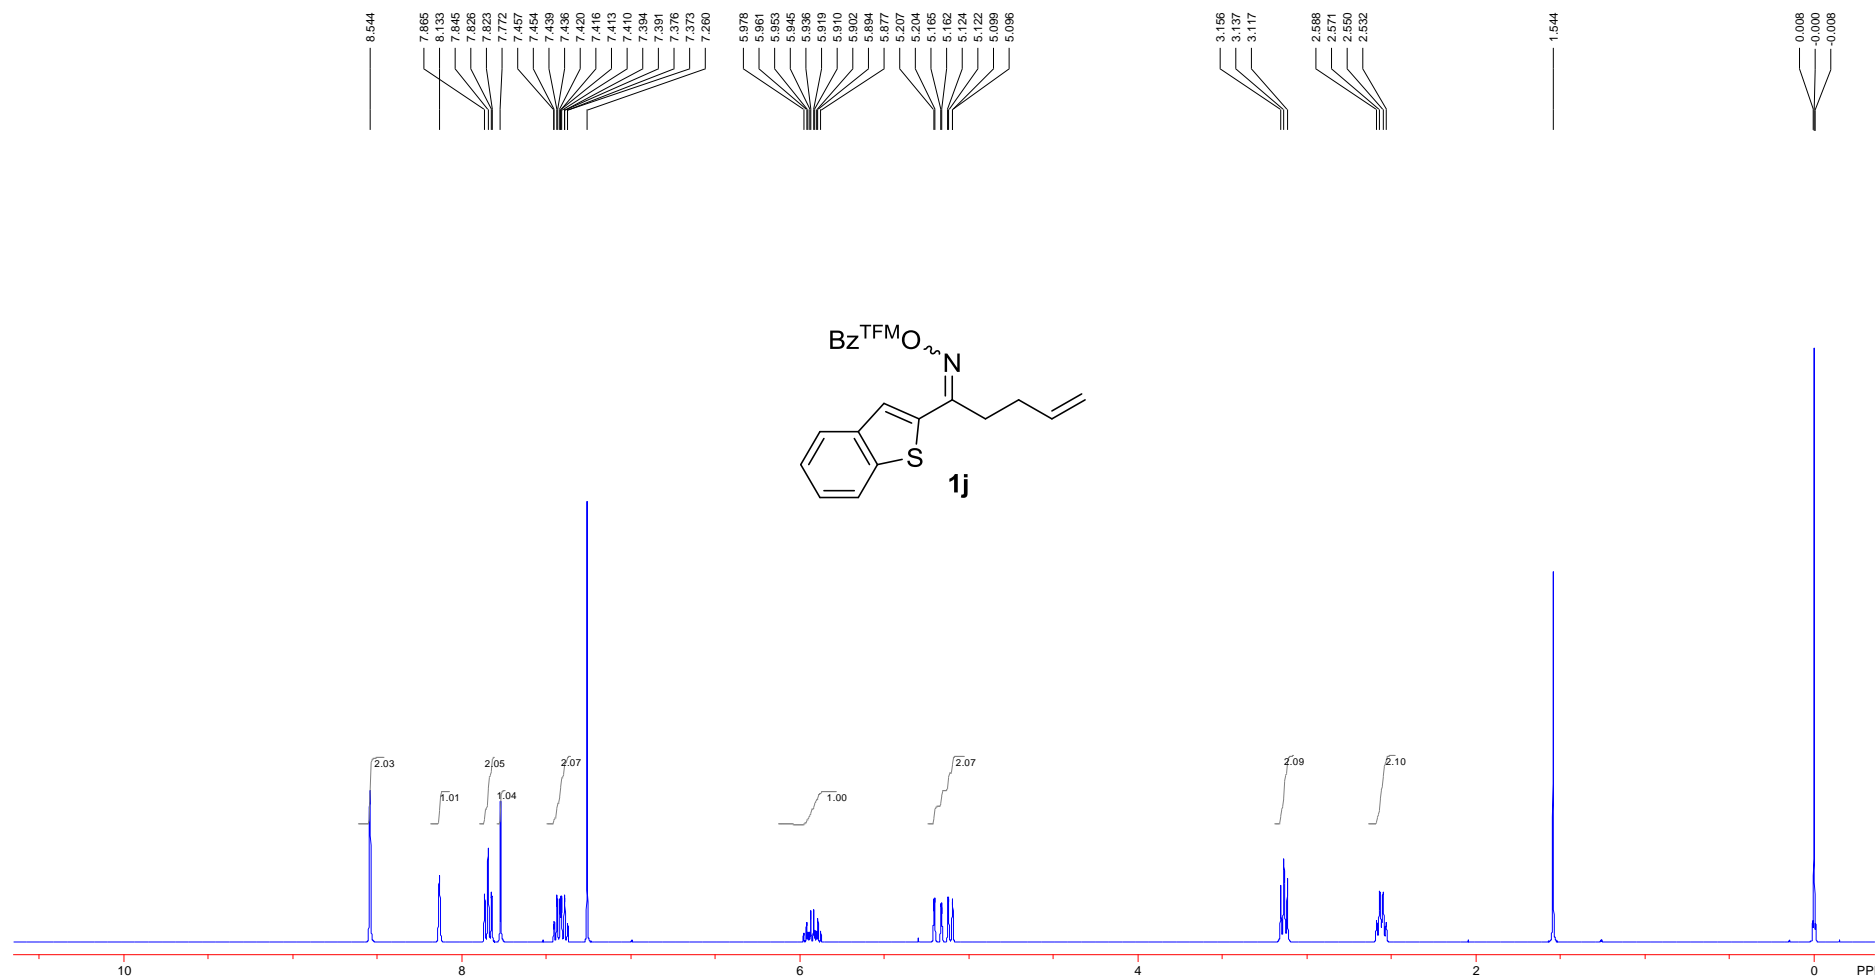



$^{13}\text{C}$  NMR (100 MHz,  $\text{CDCl}_3$ )

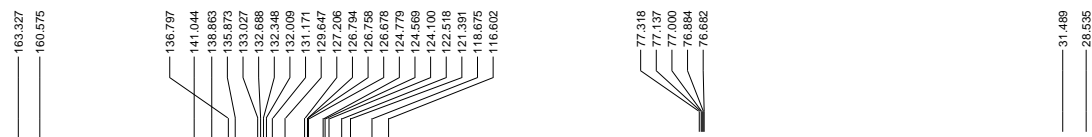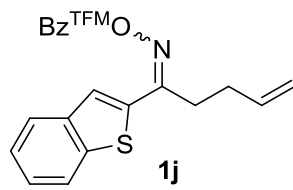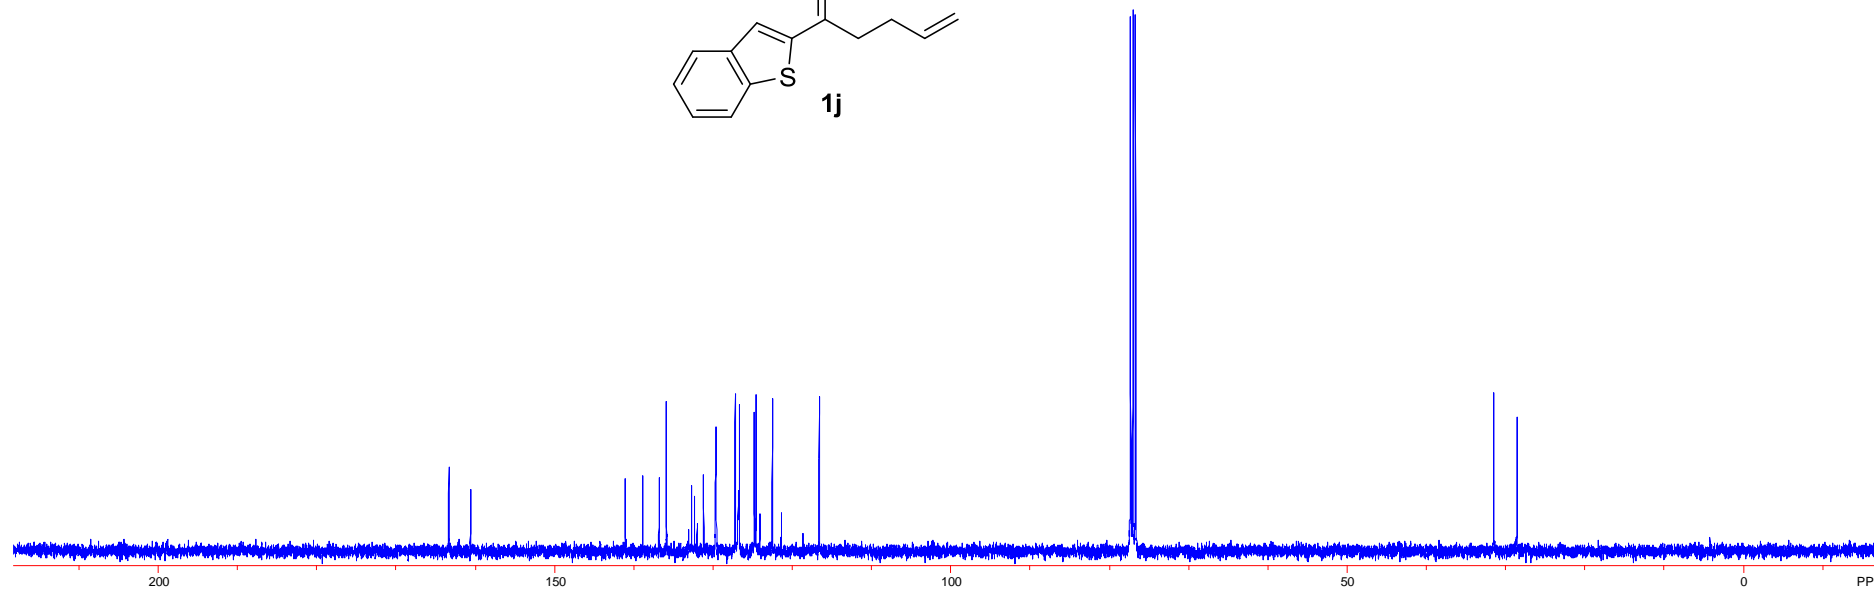

$^1\text{H}$  NMR(400 MHz,  $\text{CDCl}_3$ )

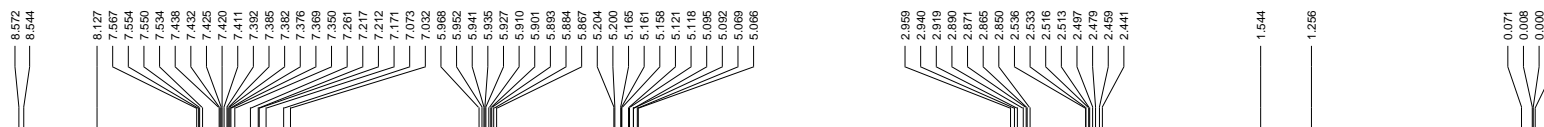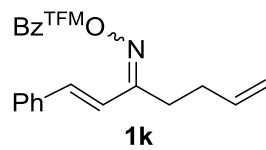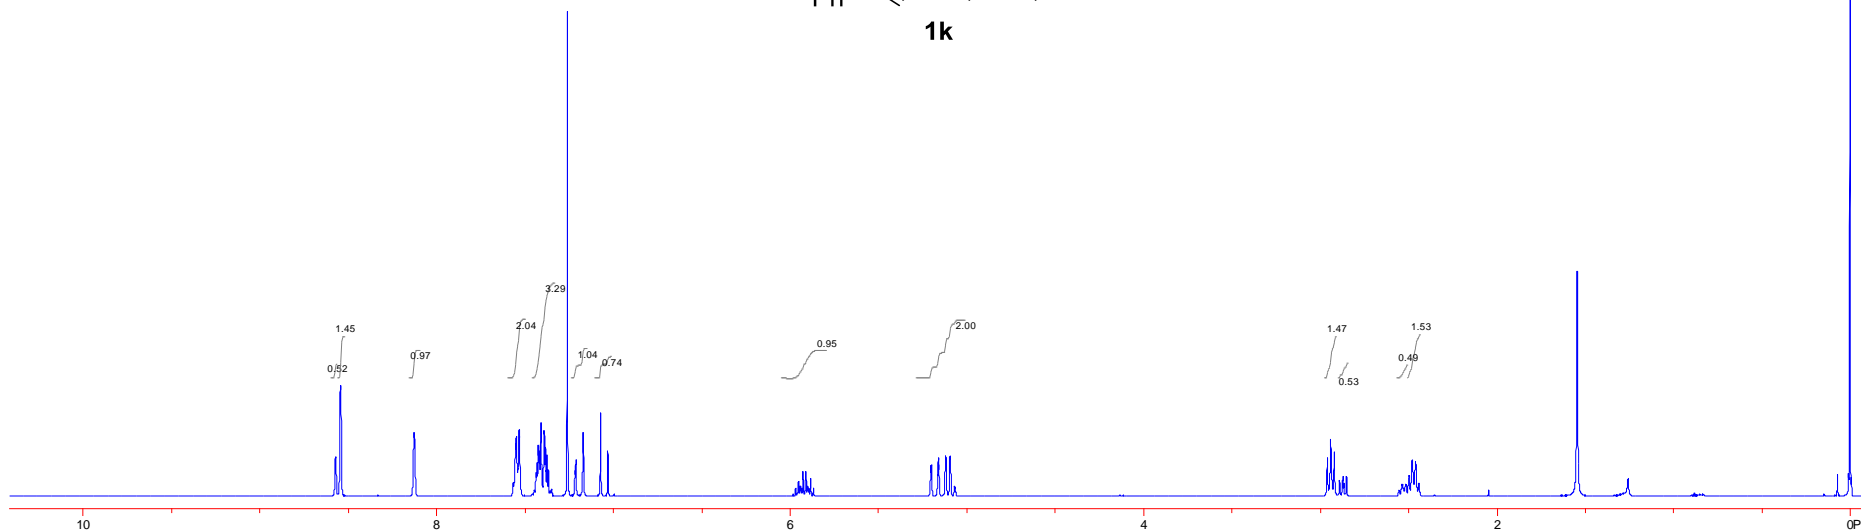

$^{13}\text{C}$  NMR (100 MHz,  $\text{CDCl}_3$ )

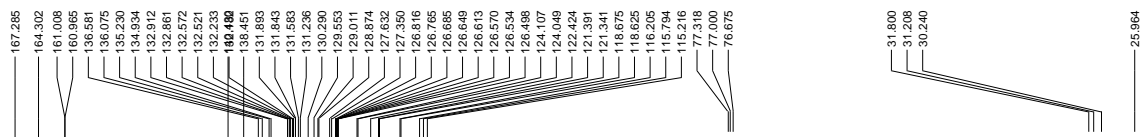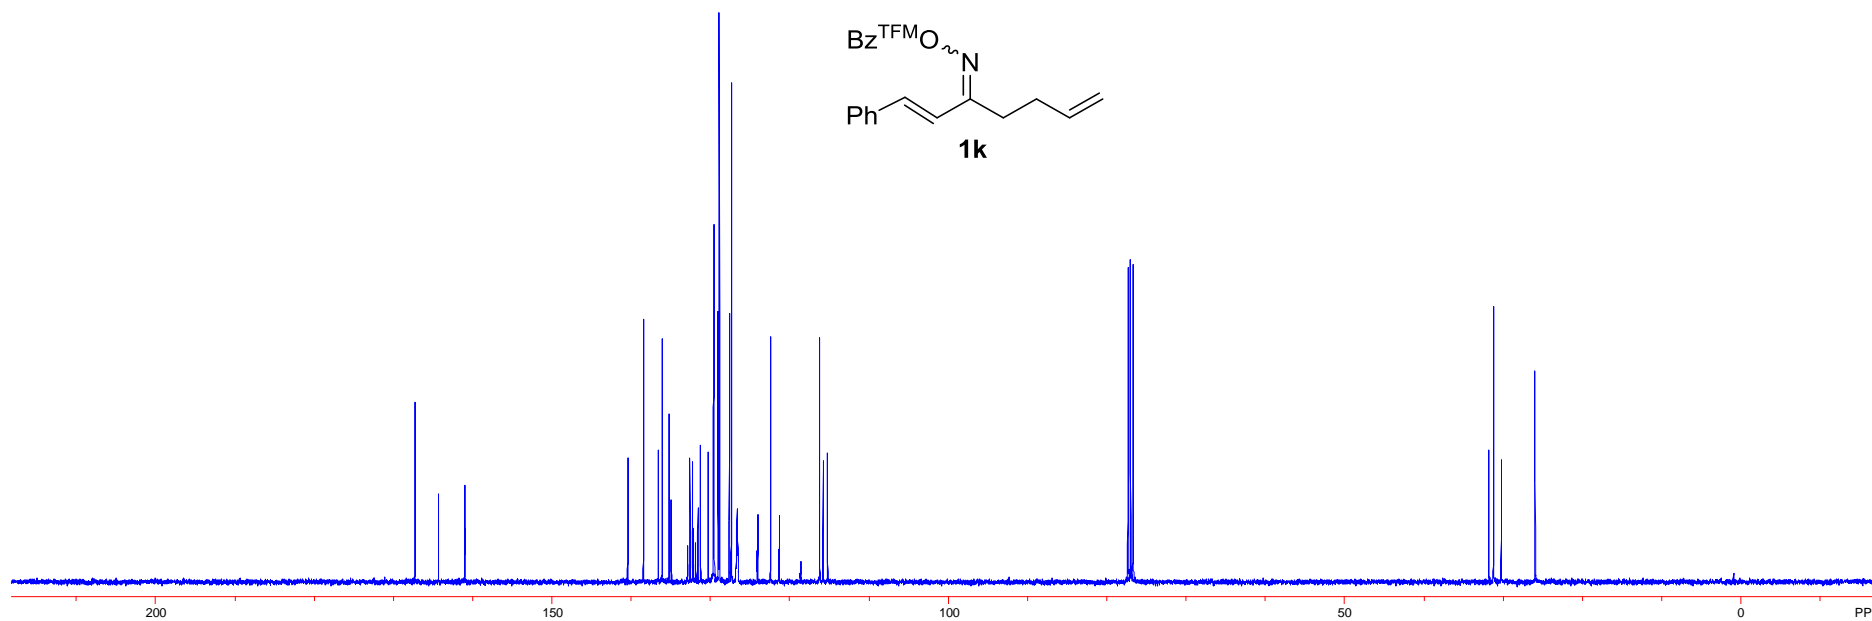

$^1\text{H}$  NMR(600 MHz,  $\text{CDCl}_3$ )

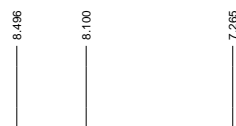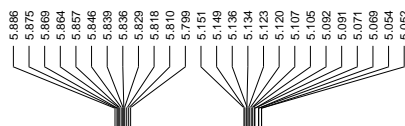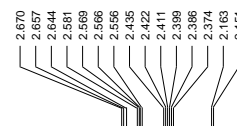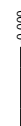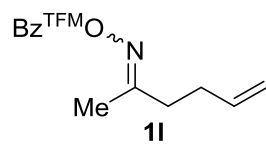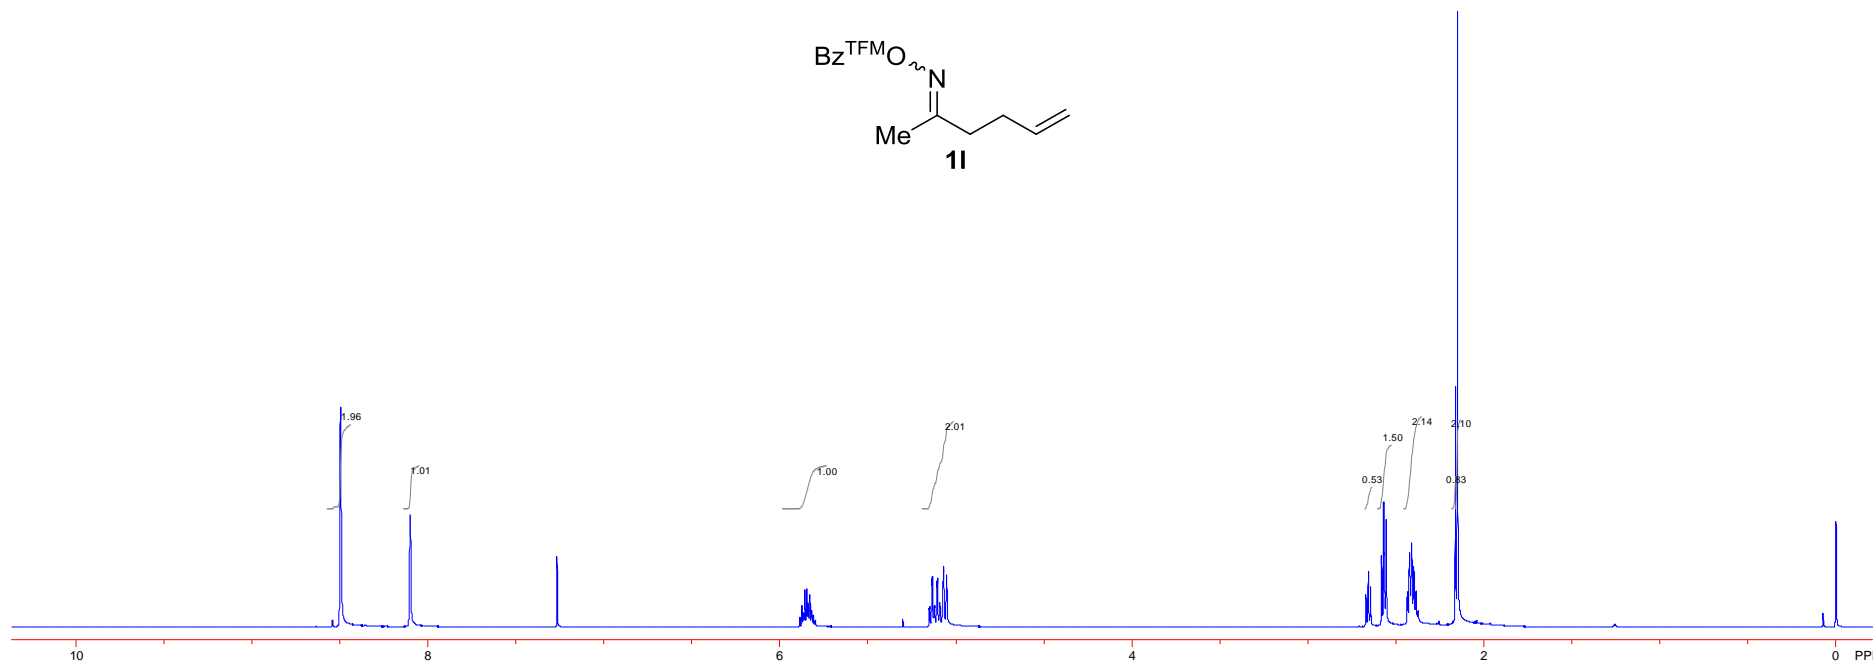

$^{13}\text{C}$  NMR (151 MHz,  $\text{CDCl}_3$ )

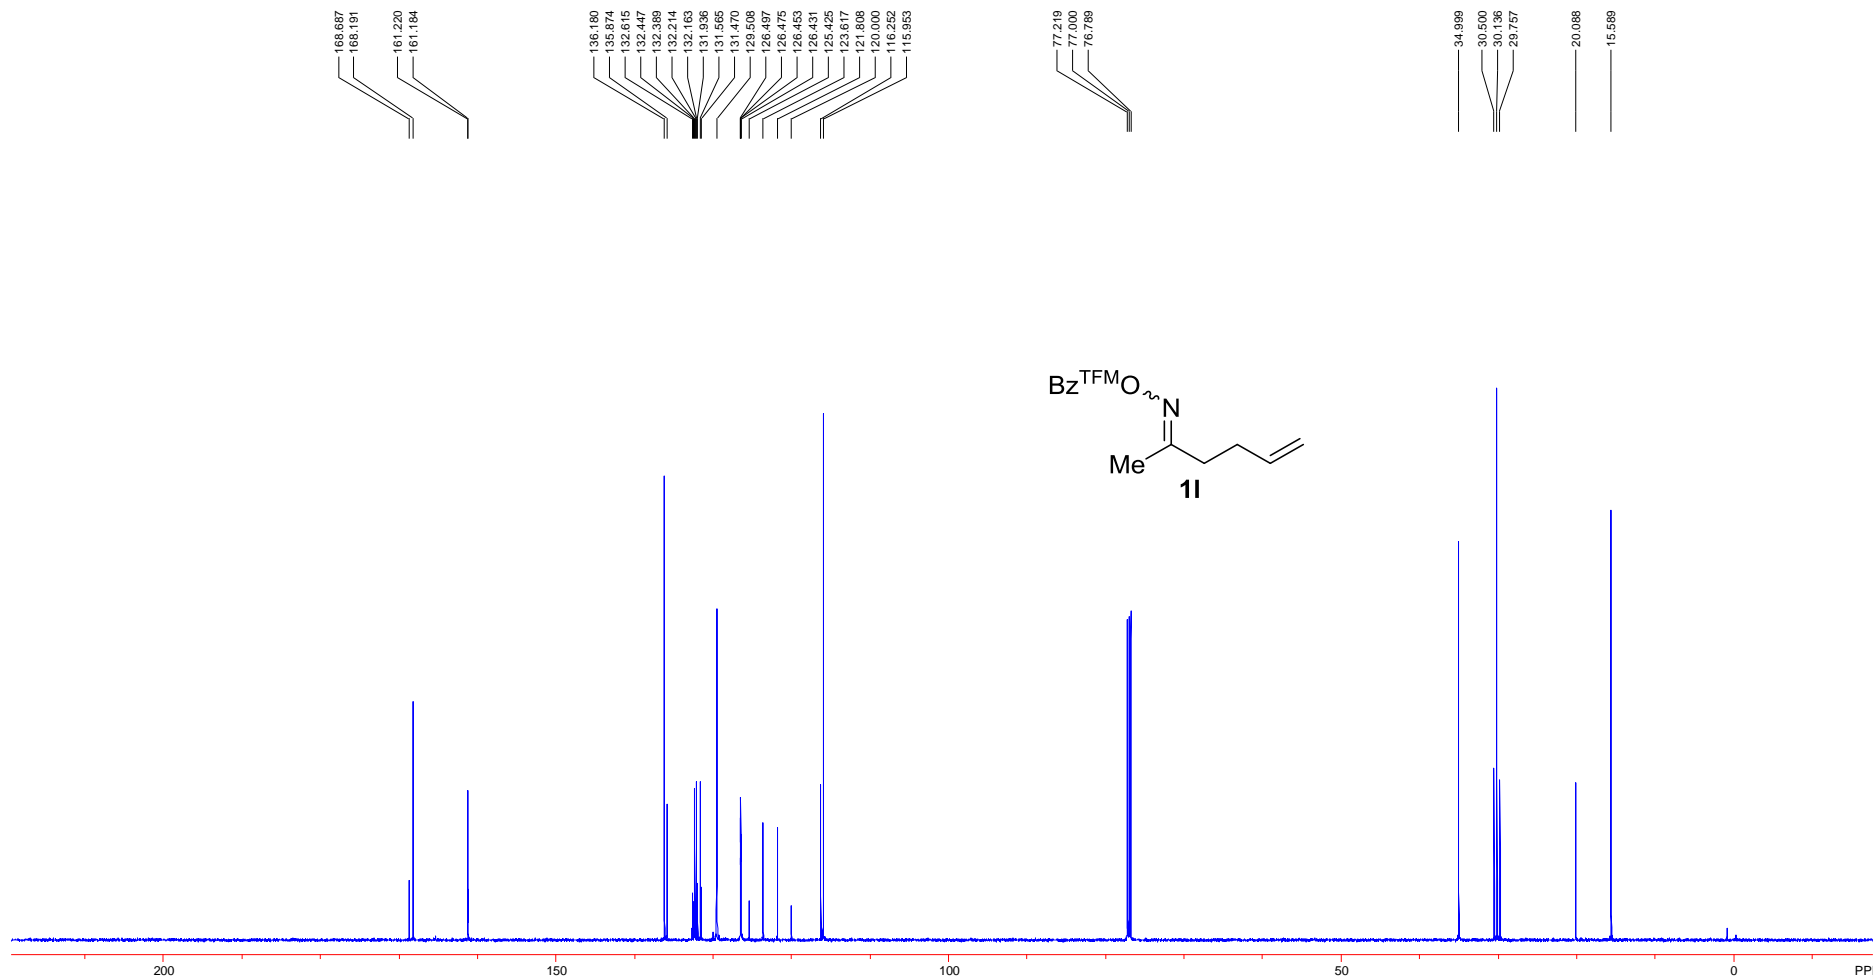

$^1\text{H}$  NMR(600 MHz,  $\text{CDCl}_3$ )

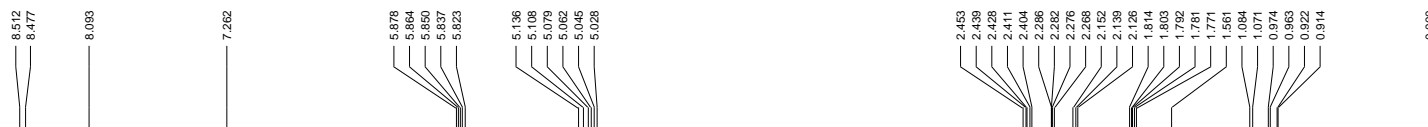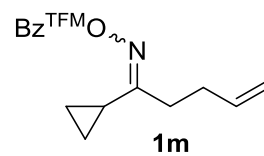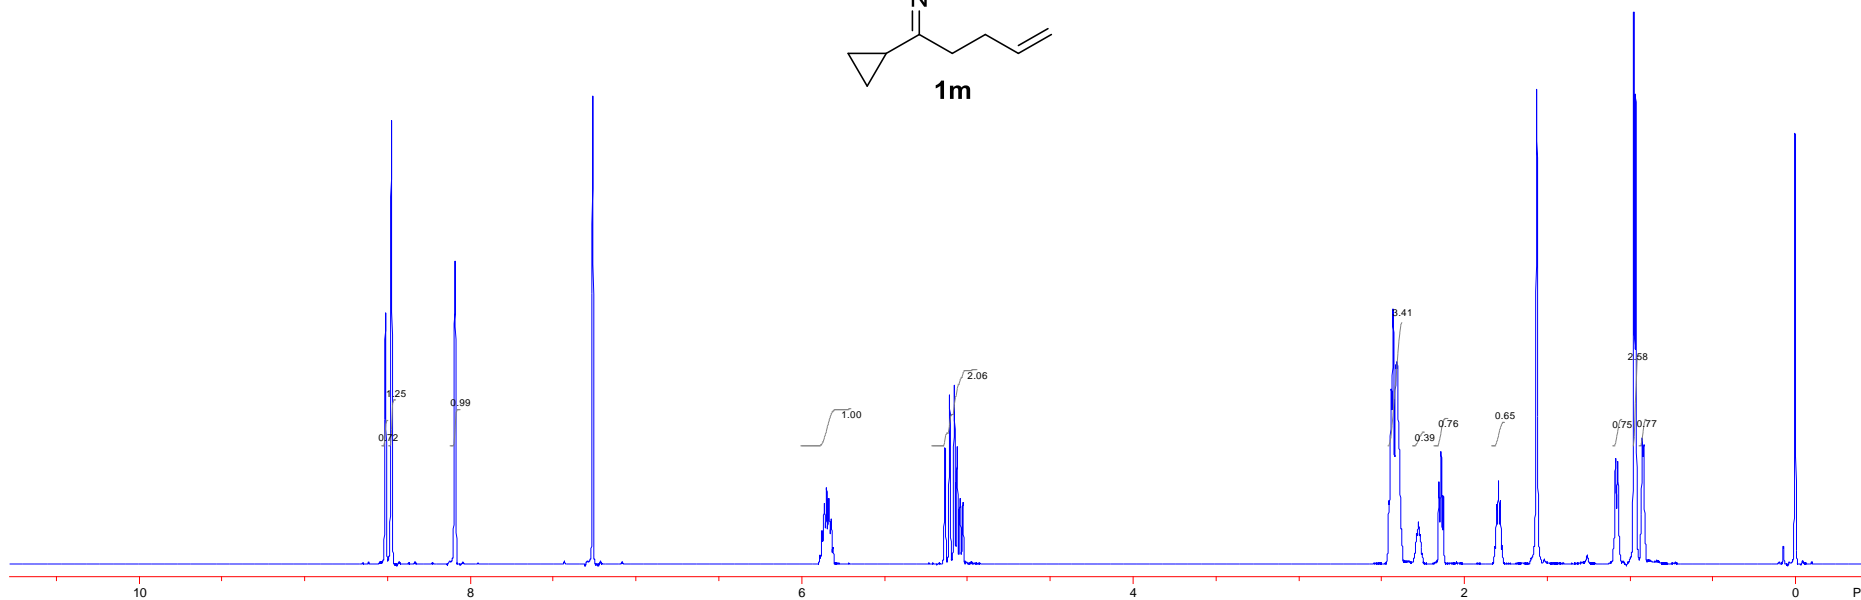

$^{13}\text{C}$  NMR (151 MHz,  $\text{CDCl}_3$ )

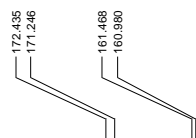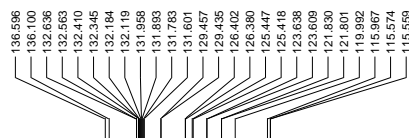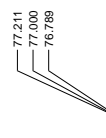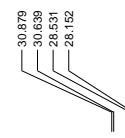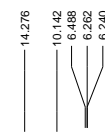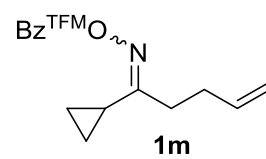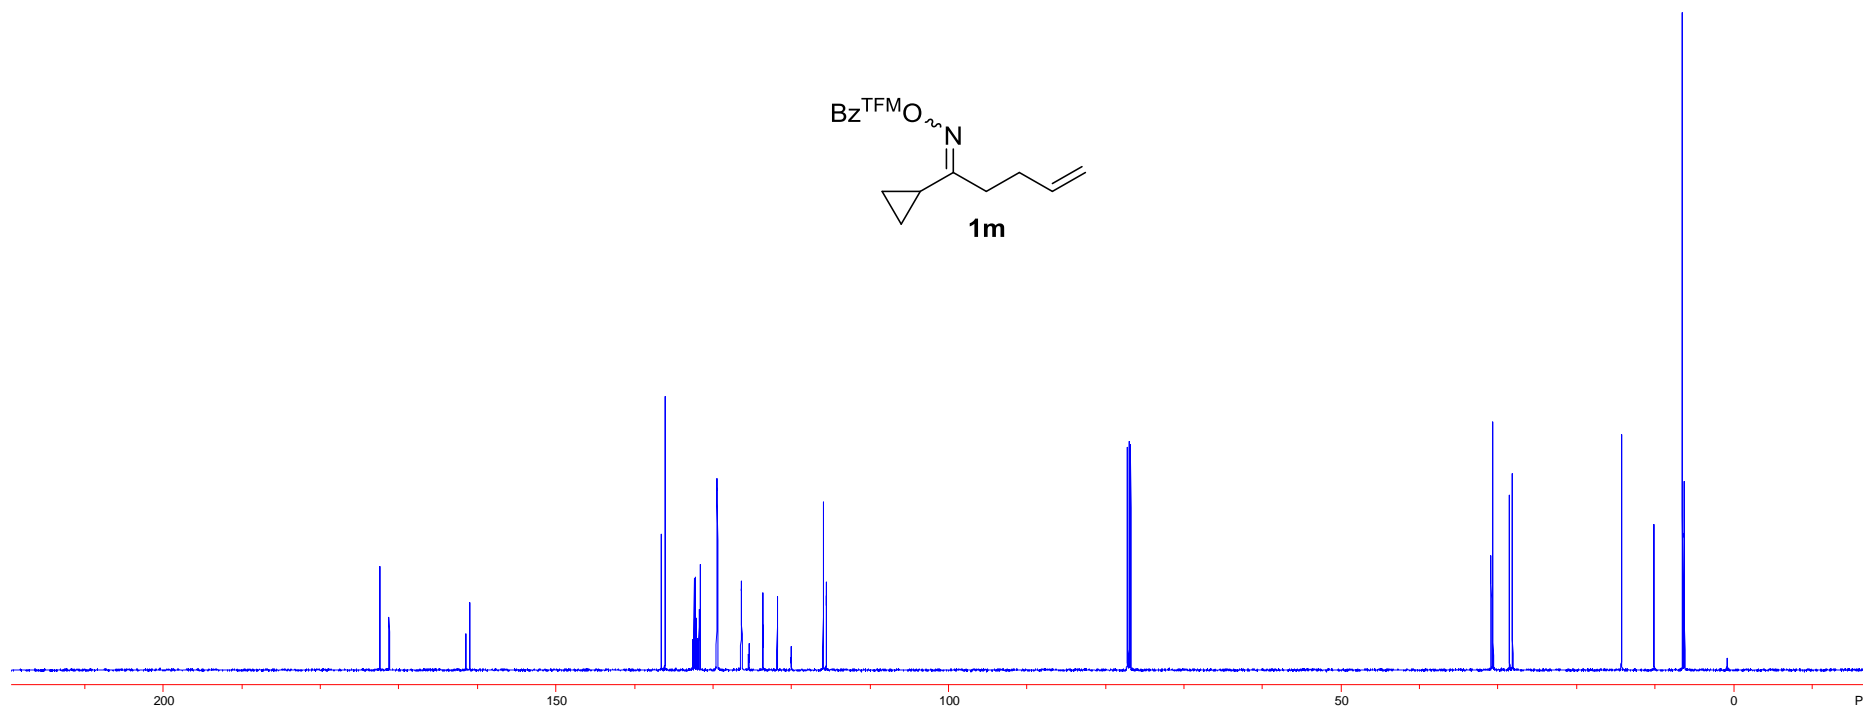

$^1\text{H}$  NMR(600 MHz,  $\text{CDCl}_3$ )

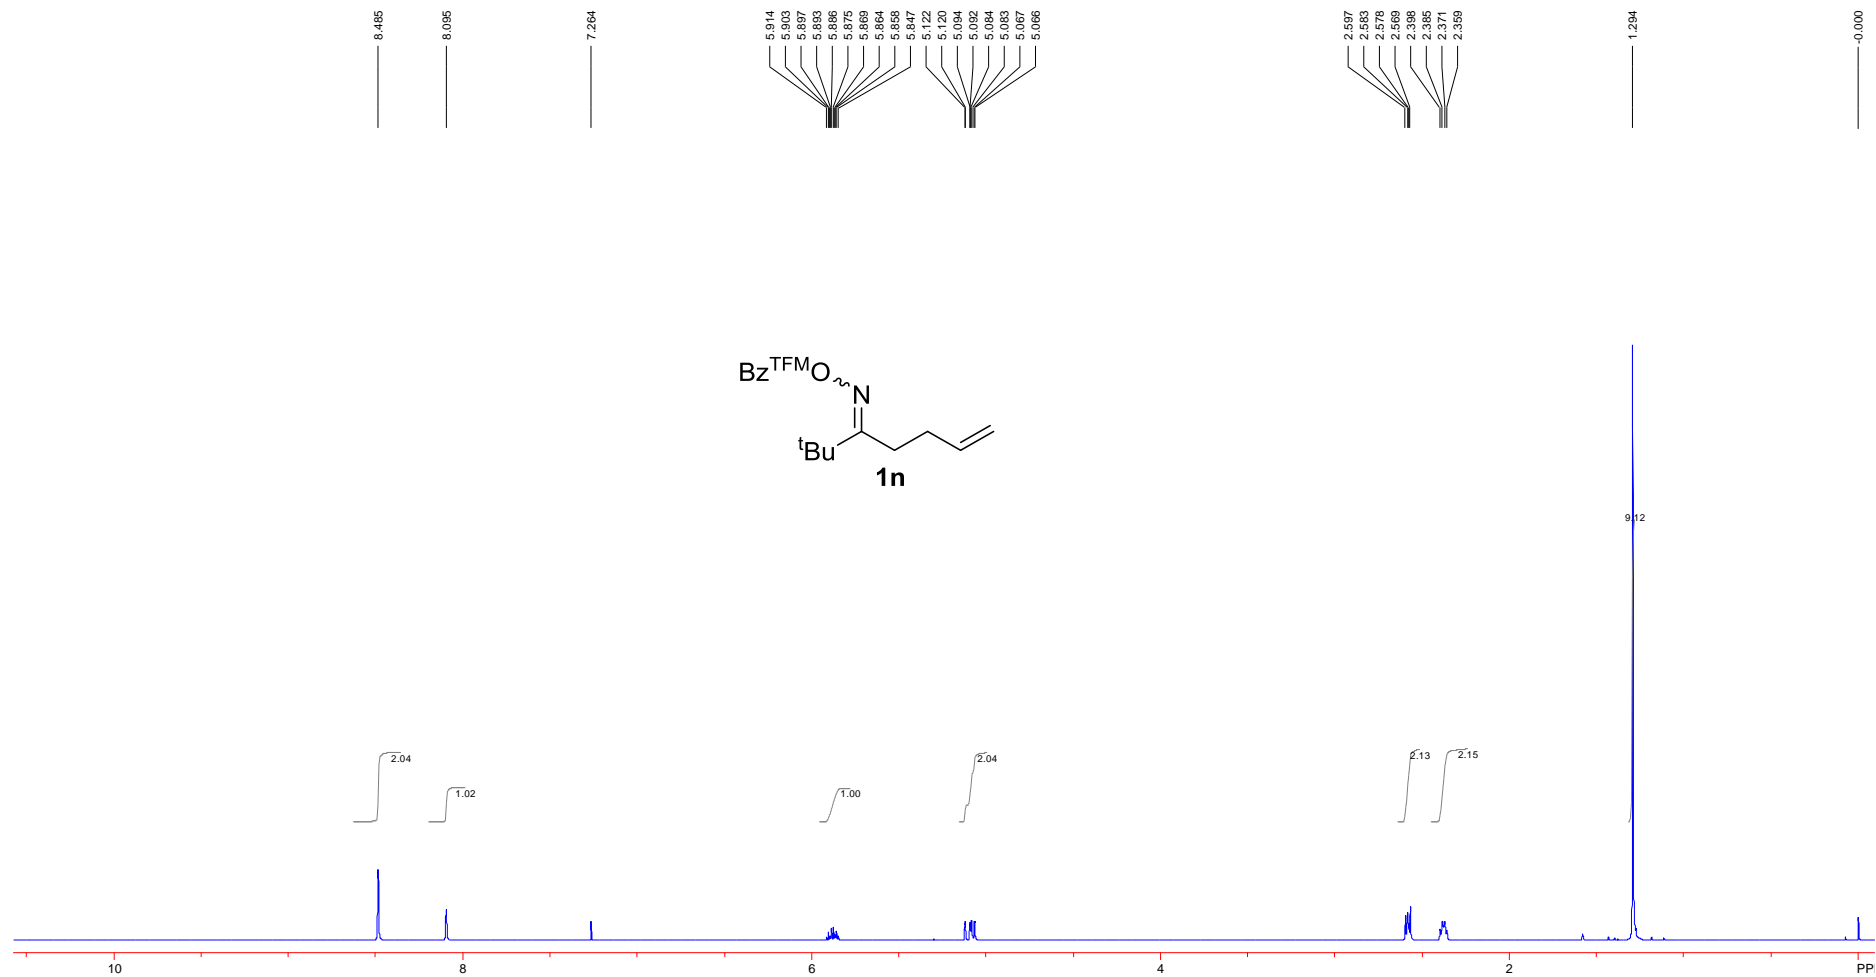

S104



$^{13}\text{C}$  NMR (151 MHz,  $\text{CDCl}_3$ )

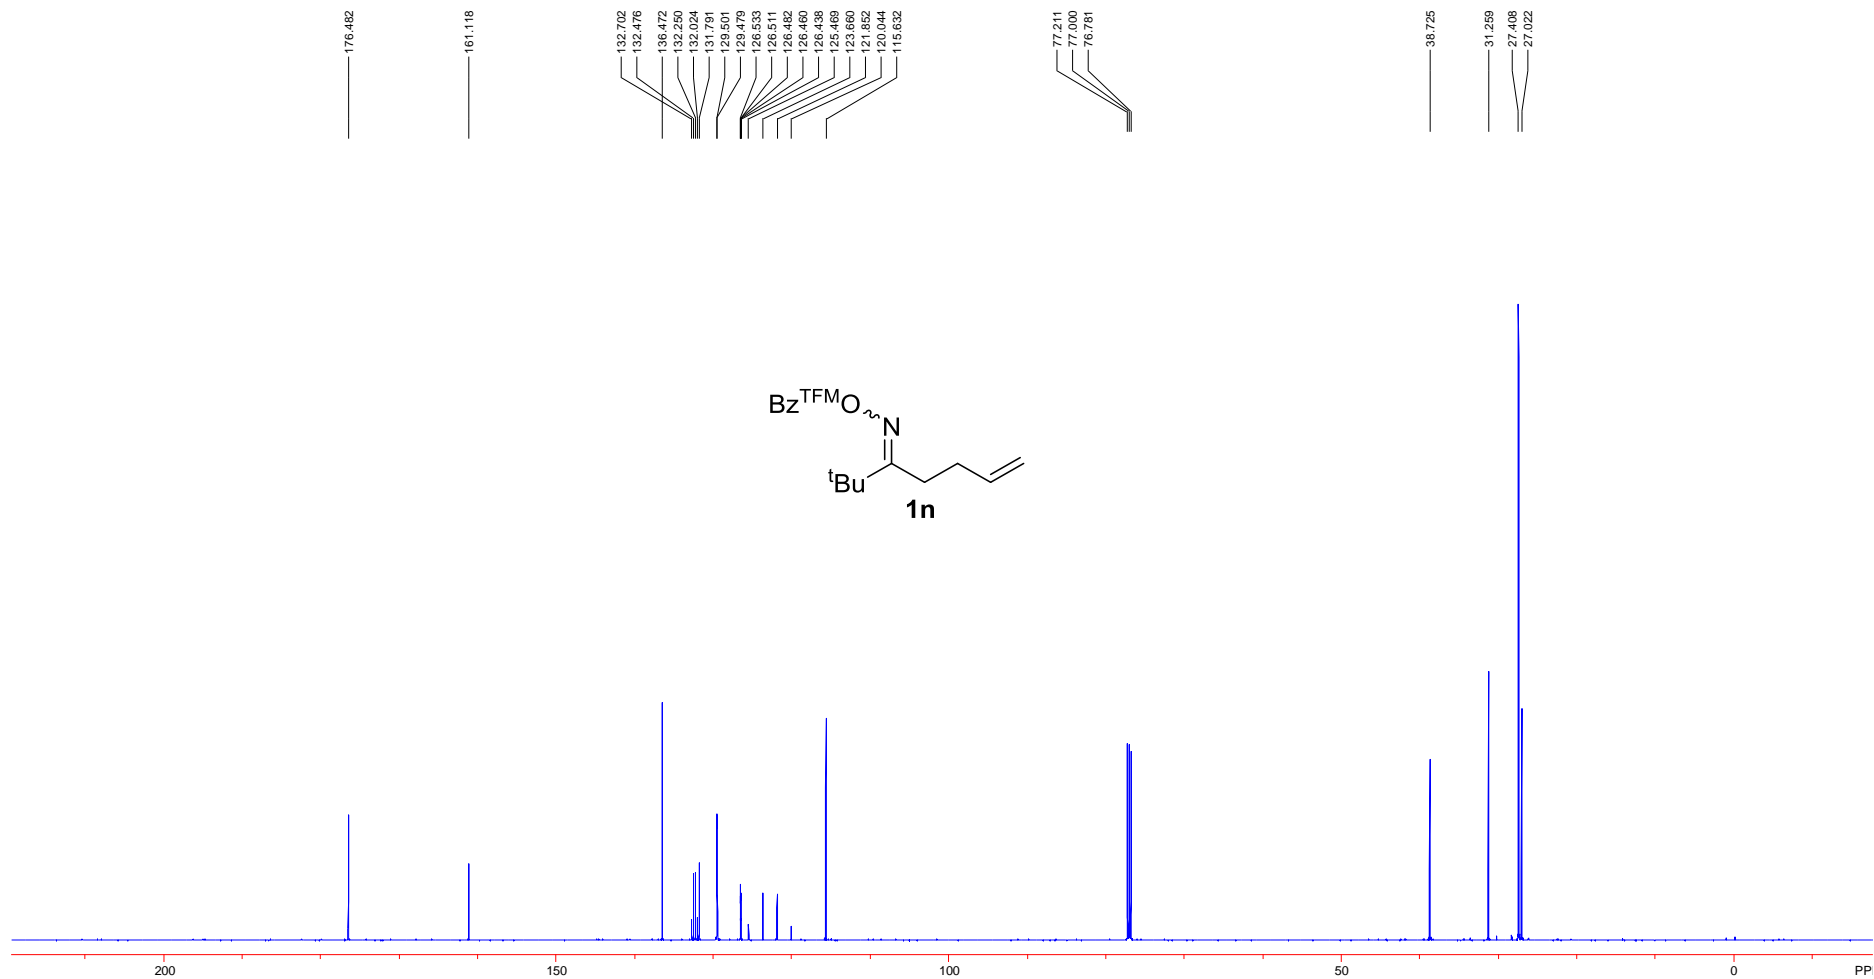

$^1\text{H}$  NMR(600 MHz,  $\text{CDCl}_3$ )

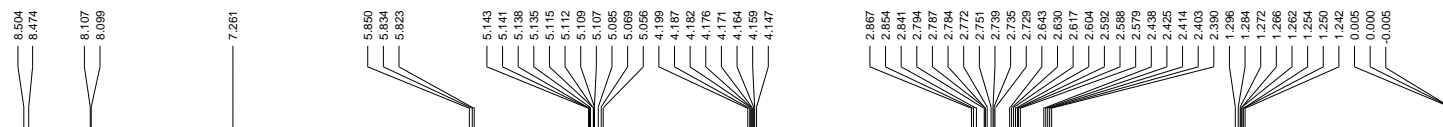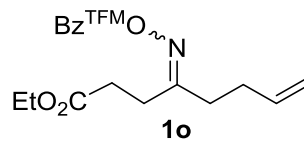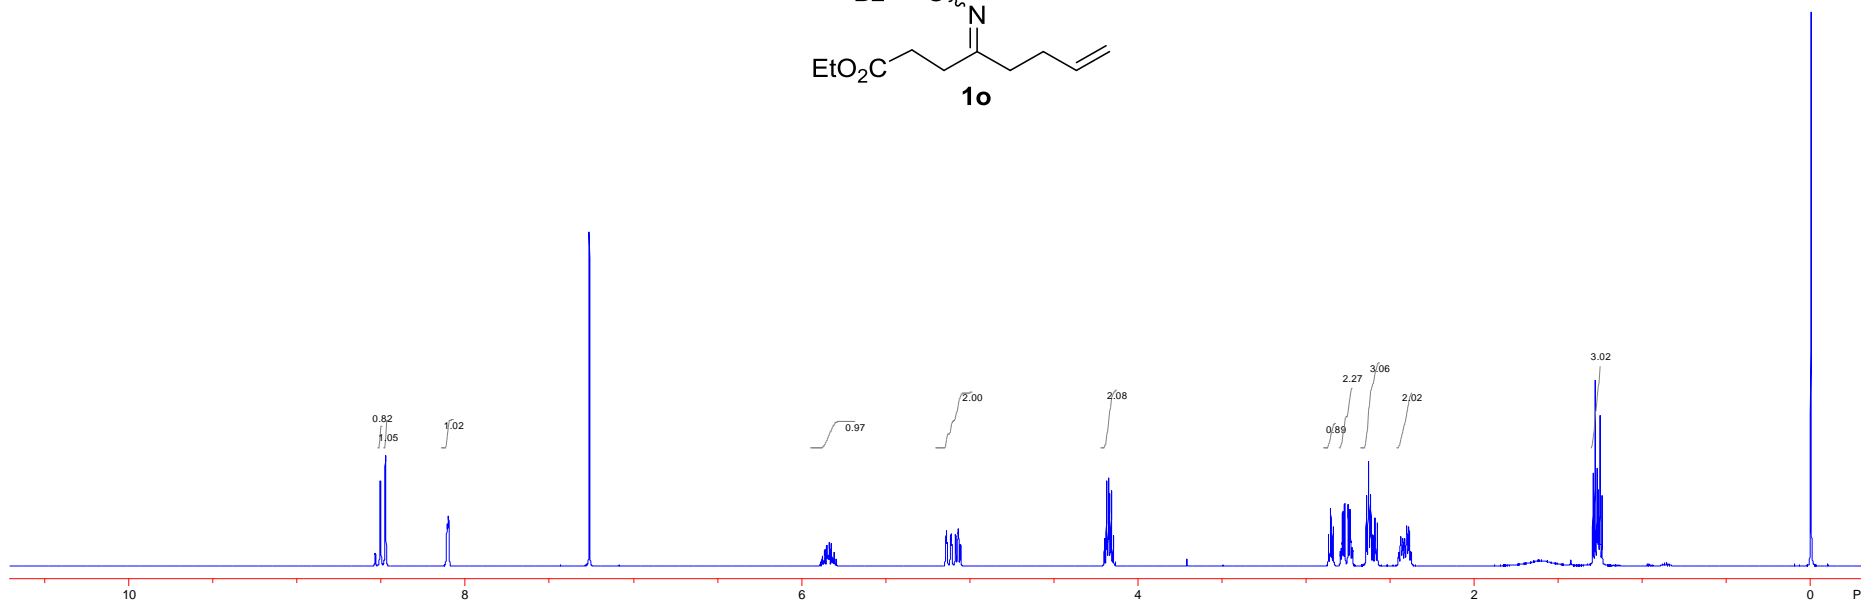

$^{13}\text{C}$  NMR (151 MHz,  $\text{CDCl}_3$ )

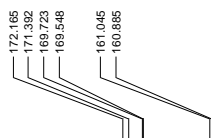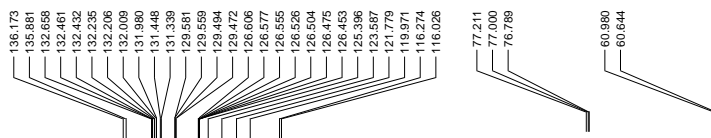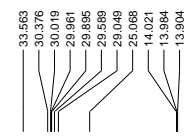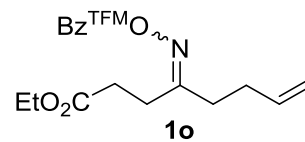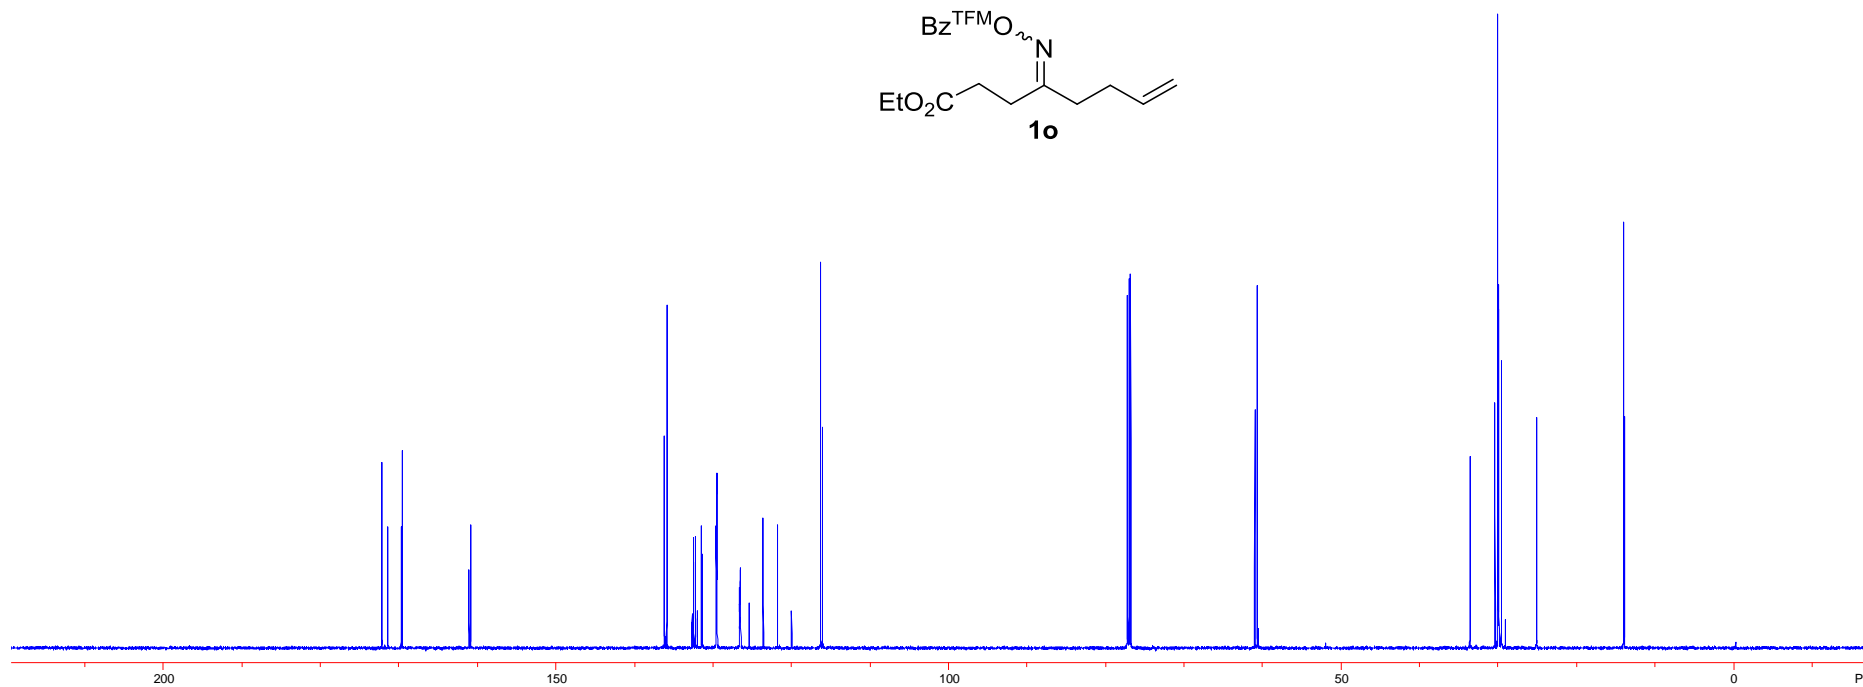

$^1\text{H}$  NMR(400 MHz,  $\text{CDCl}_3$ )

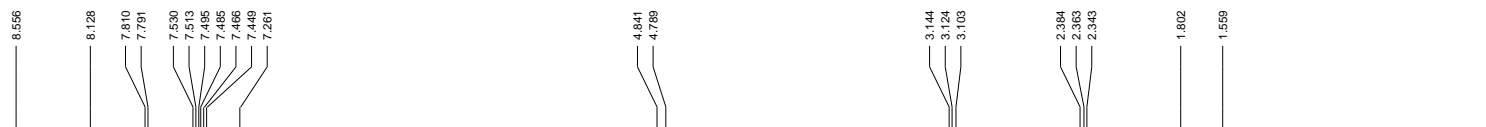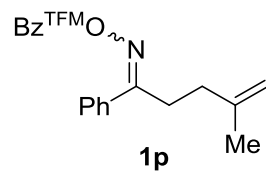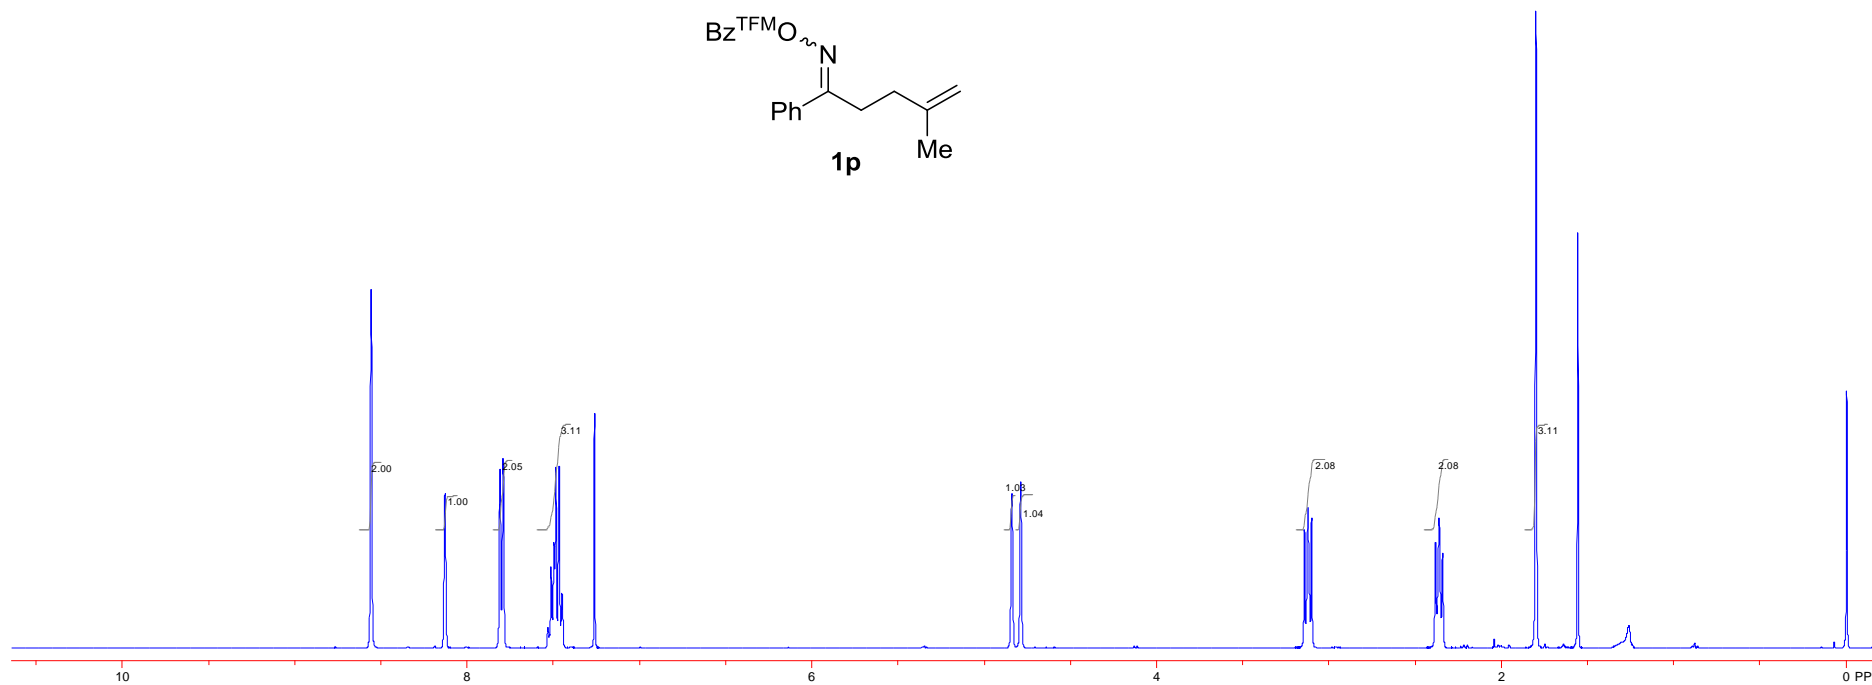

$^{13}\text{C}$  NMR (100 MHz,  $\text{CDCl}_3$ )

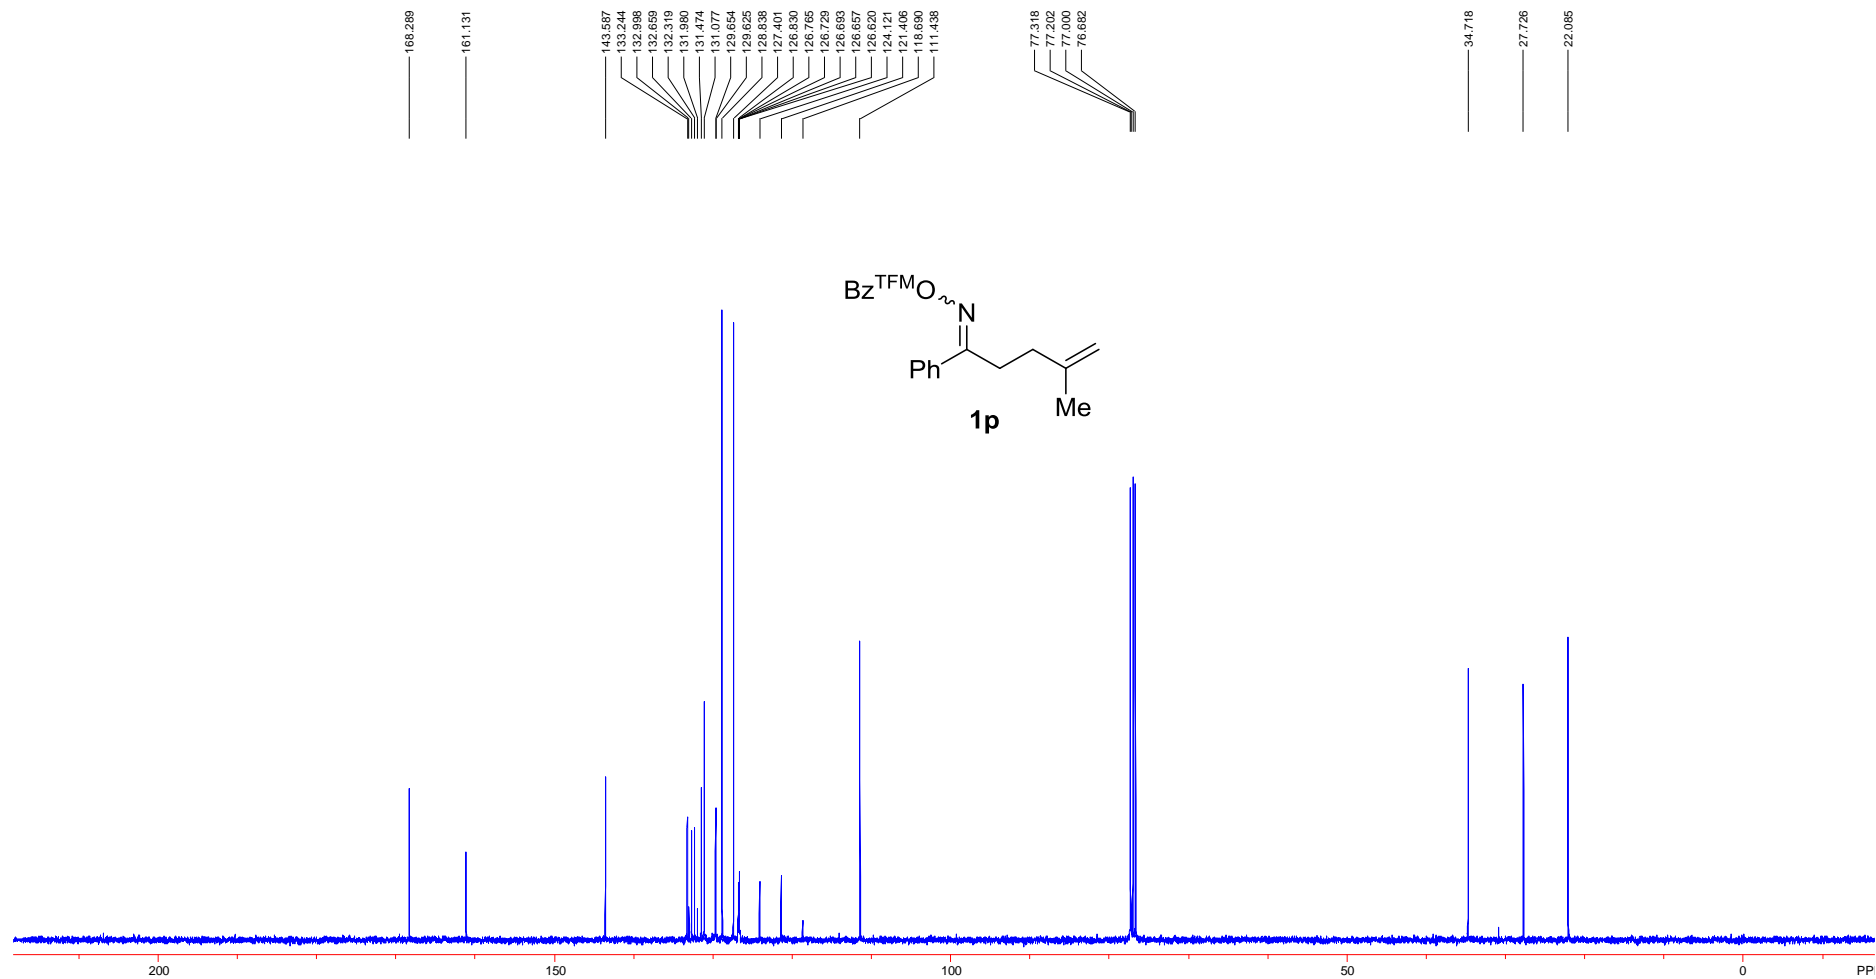

$^1\text{H}$  NMR(400 MHz,  $\text{CDCl}_3$ )

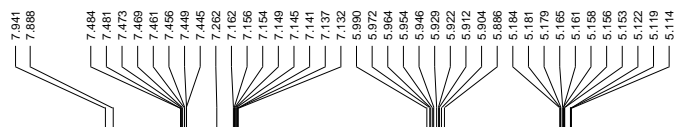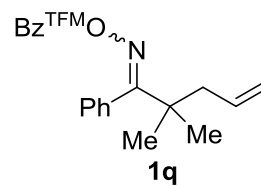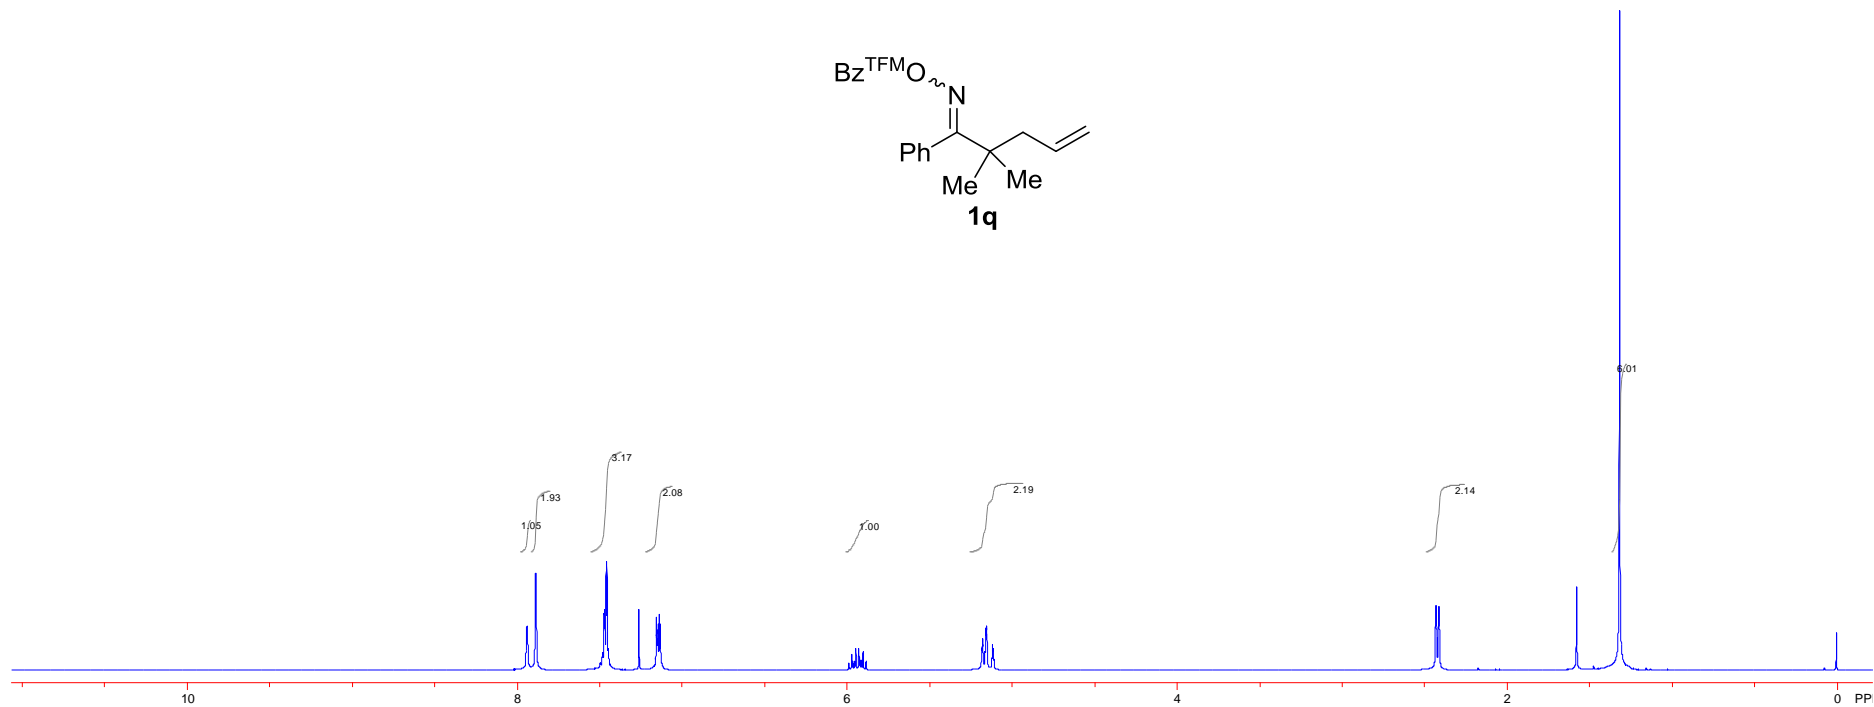

$^{13}\text{C}$  NMR (100 MHz,  $\text{CDCl}_3$ )

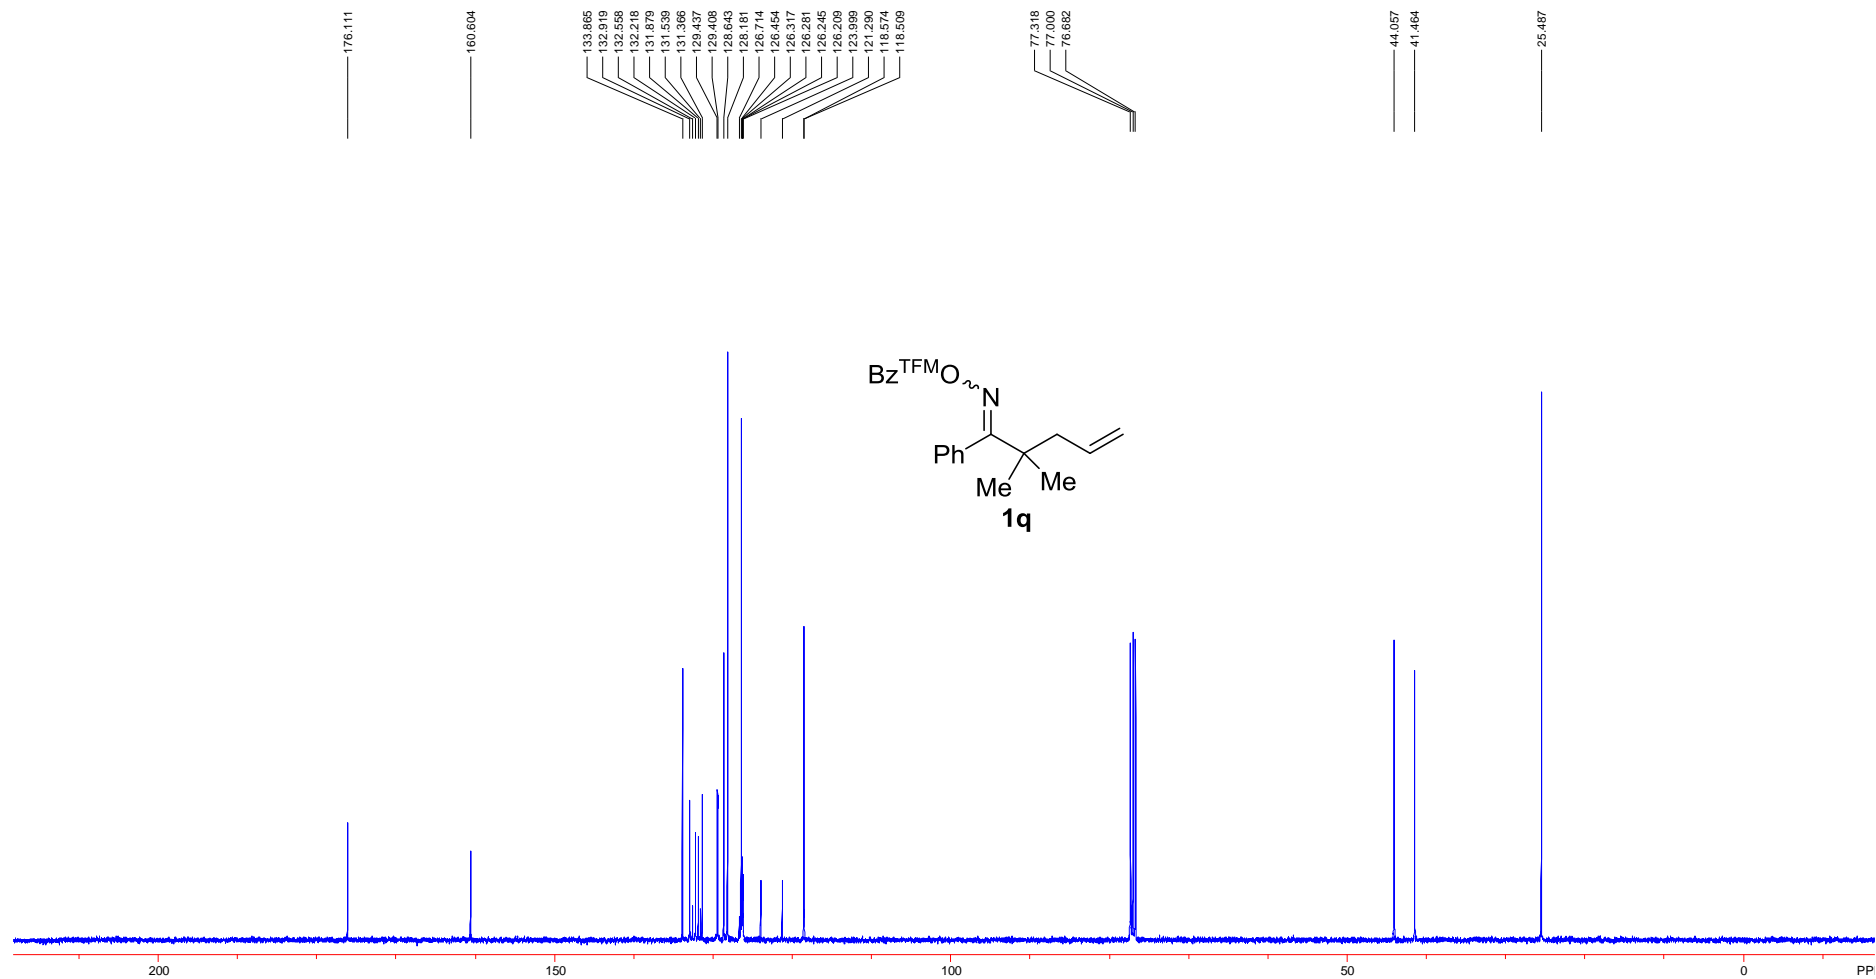

$^1\text{H}$  NMR(400 MHz,  $\text{CDCl}_3$ )

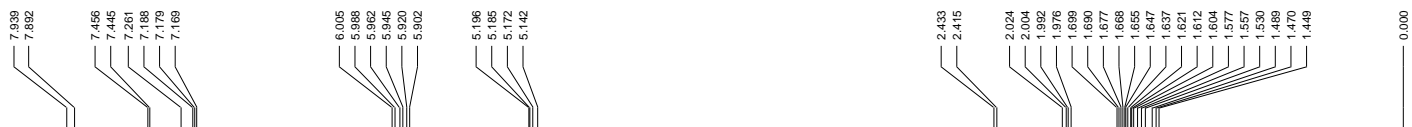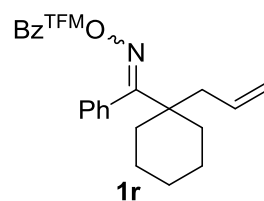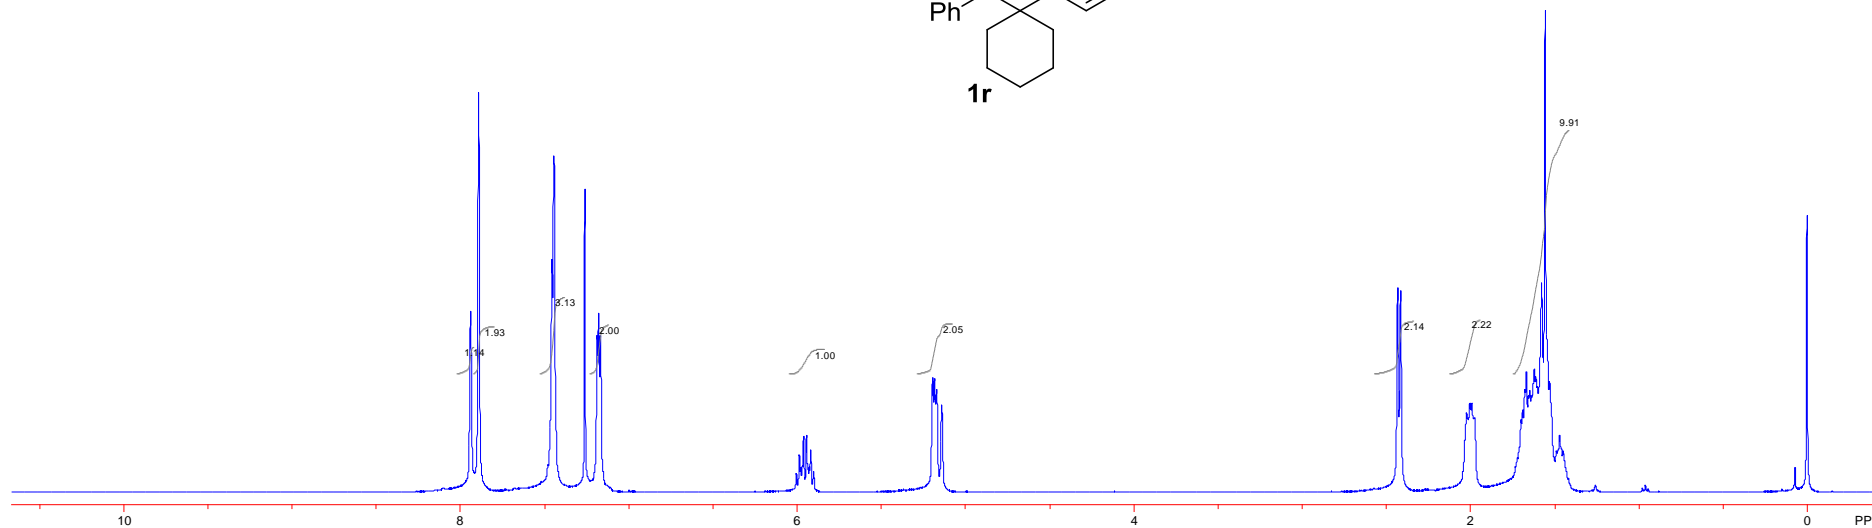



$^{13}\text{C}$  NMR (151 MHz,  $\text{CDCl}_3$ )

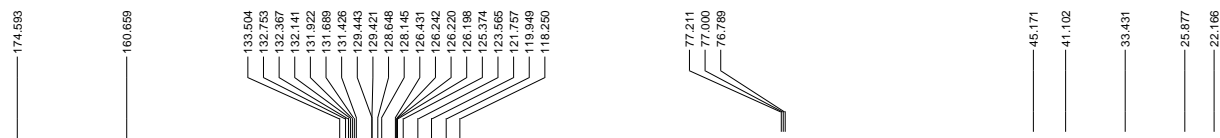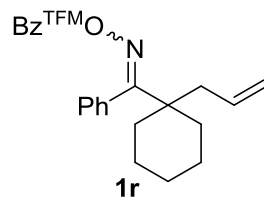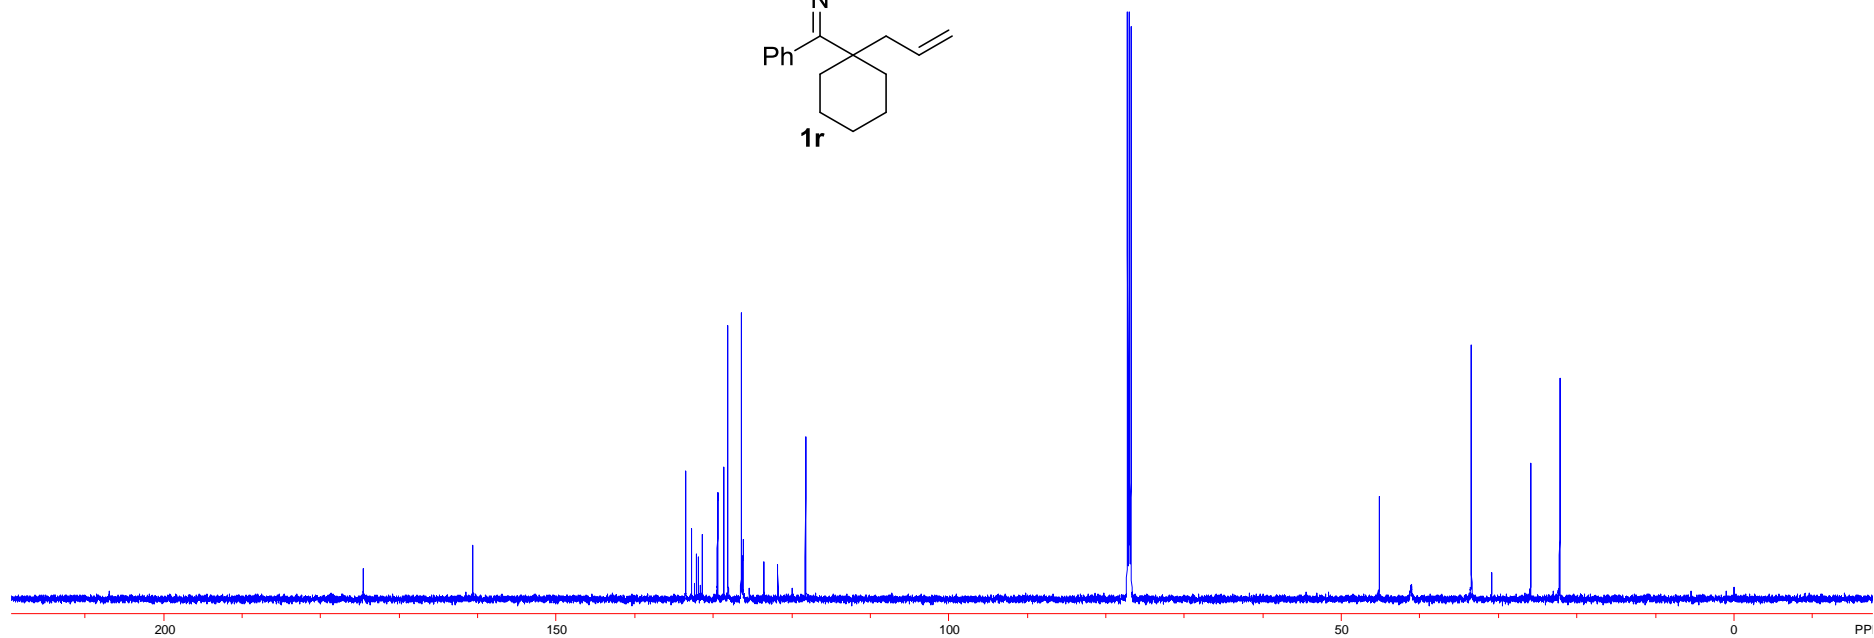

$^1\text{H}$  NMR(600 MHz,  $\text{CDCl}_3$ )

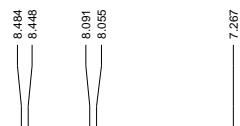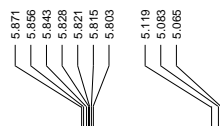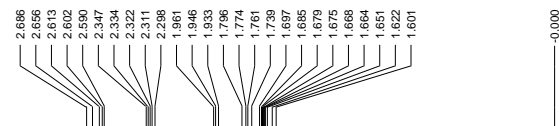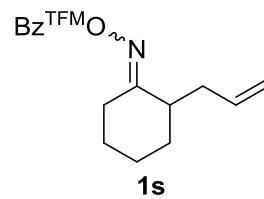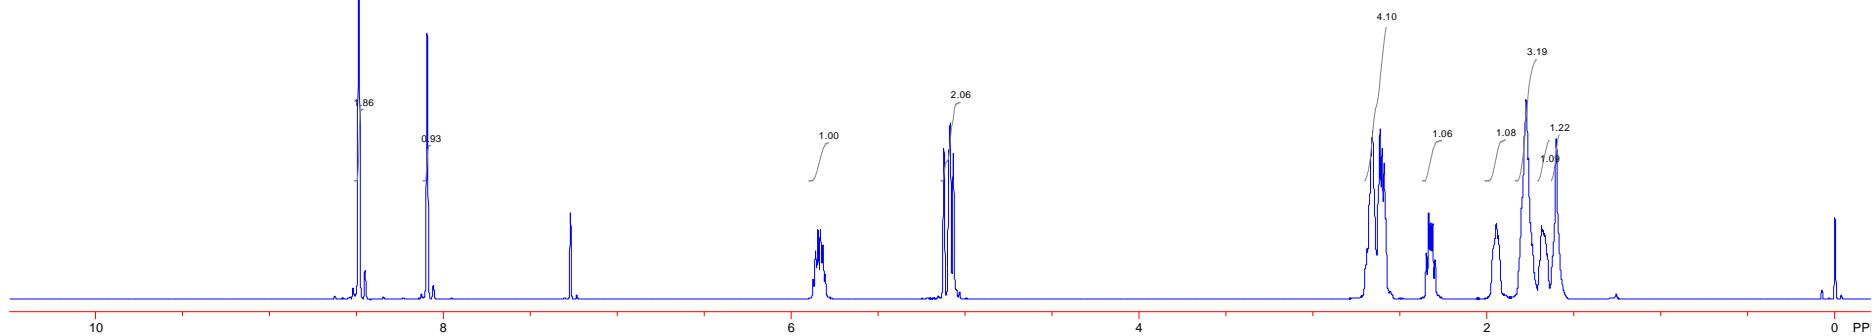

$^{13}\text{C}$  NMR (151 MHz,  $\text{CDCl}_3$ )

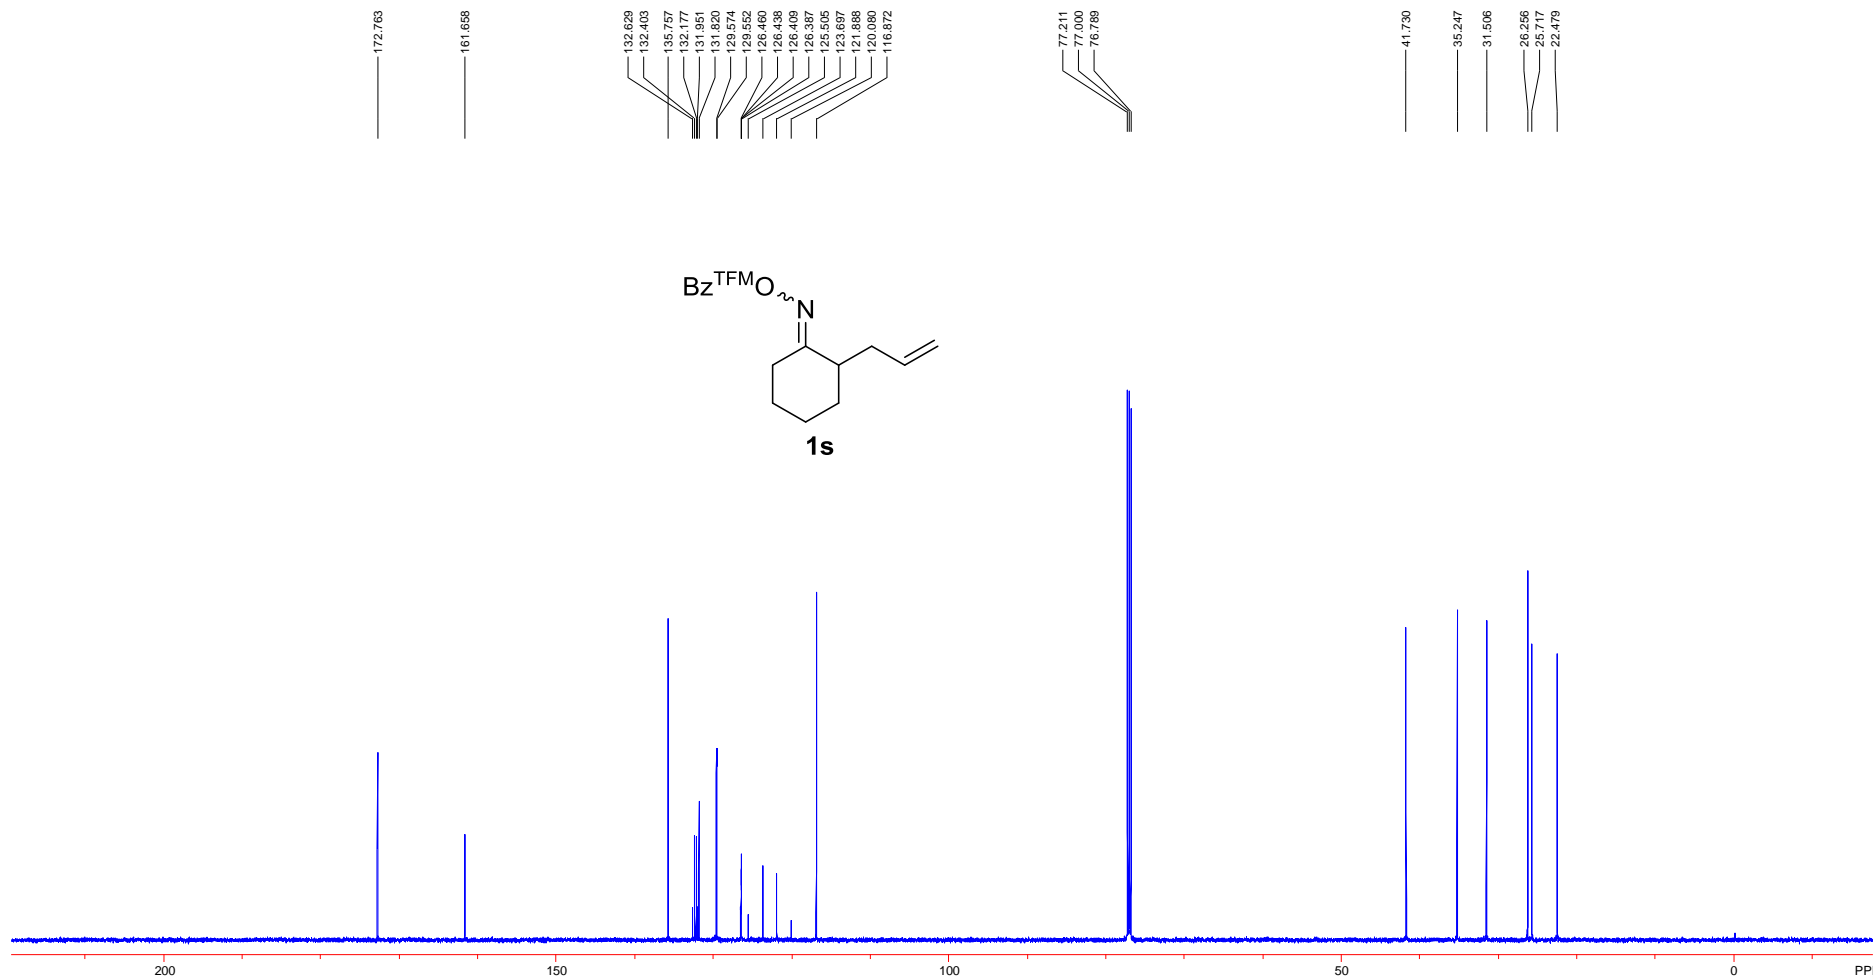

$^1\text{H}$  NMR(400 MHz,  $\text{CDCl}_3$ )

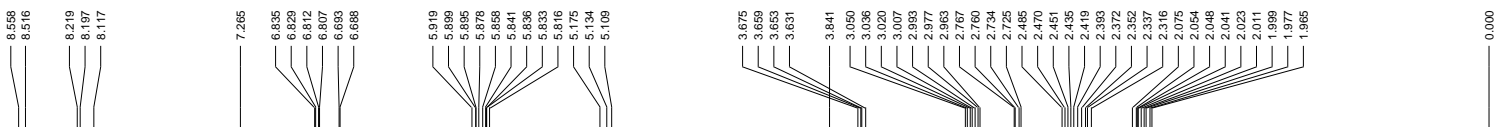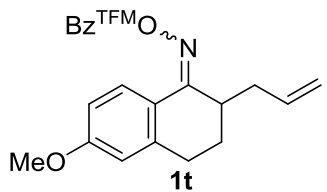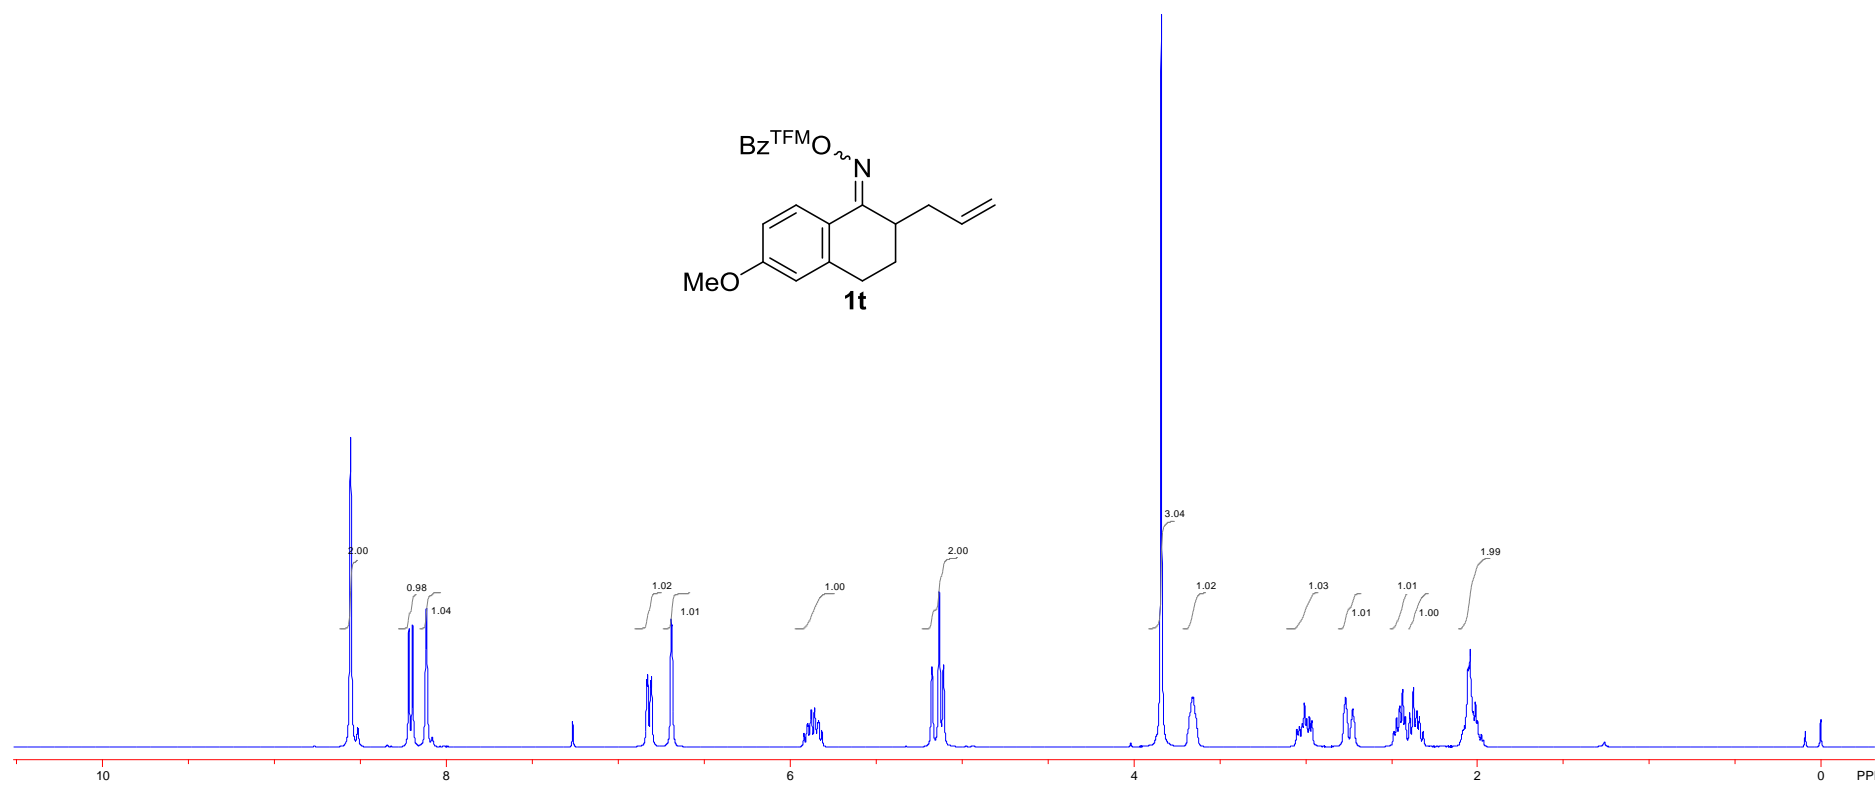

$^{13}\text{C}$  NMR (100 MHz,  $\text{CDCl}_3$ )

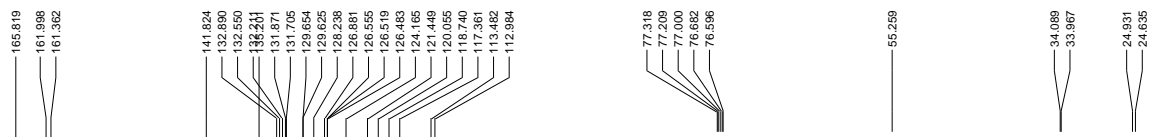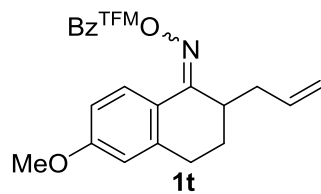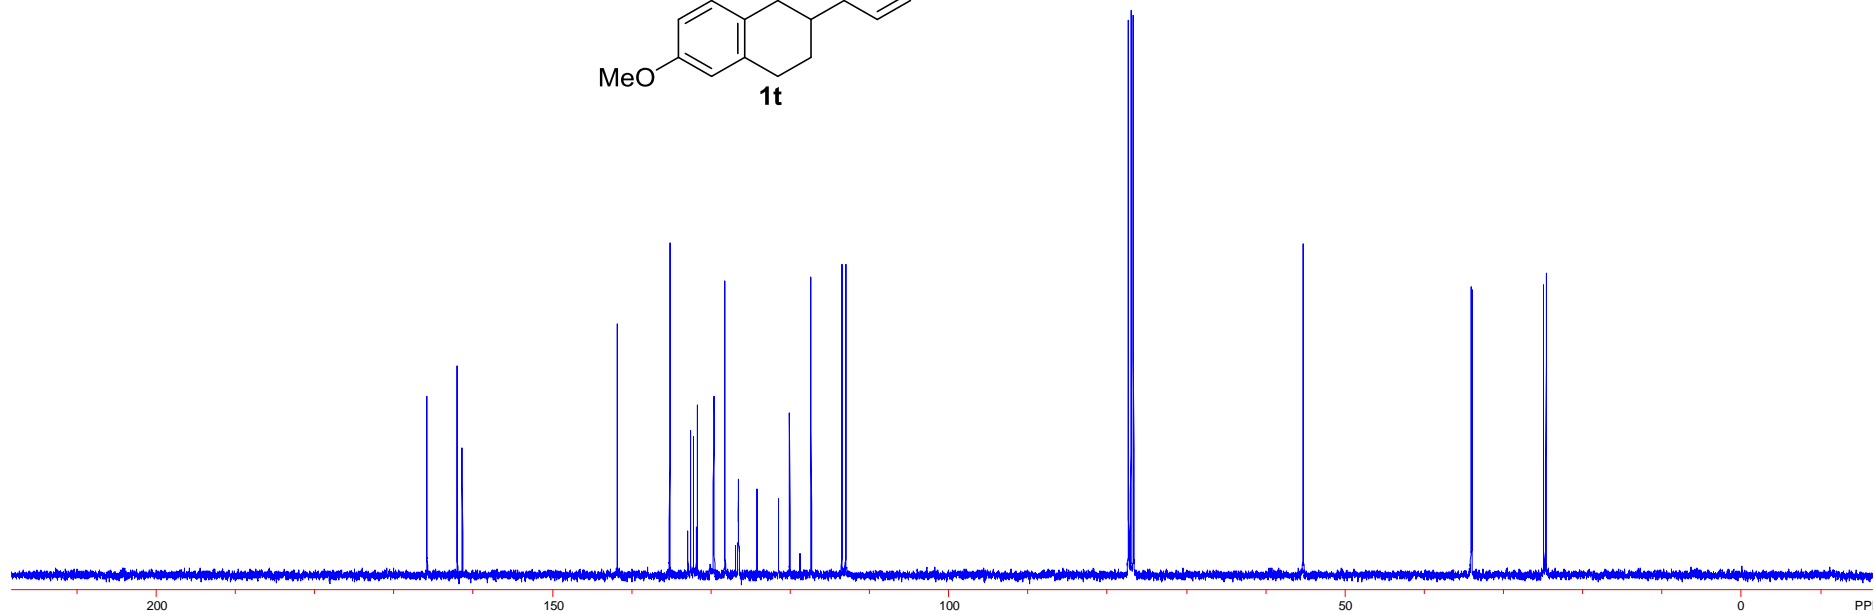

$^1\text{H}$  NMR(600 MHz,  $\text{CDCl}_3$ )

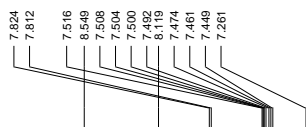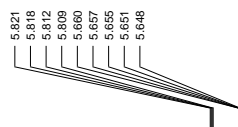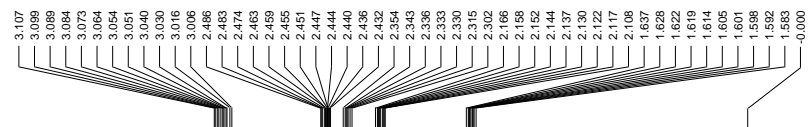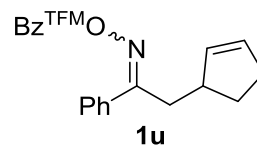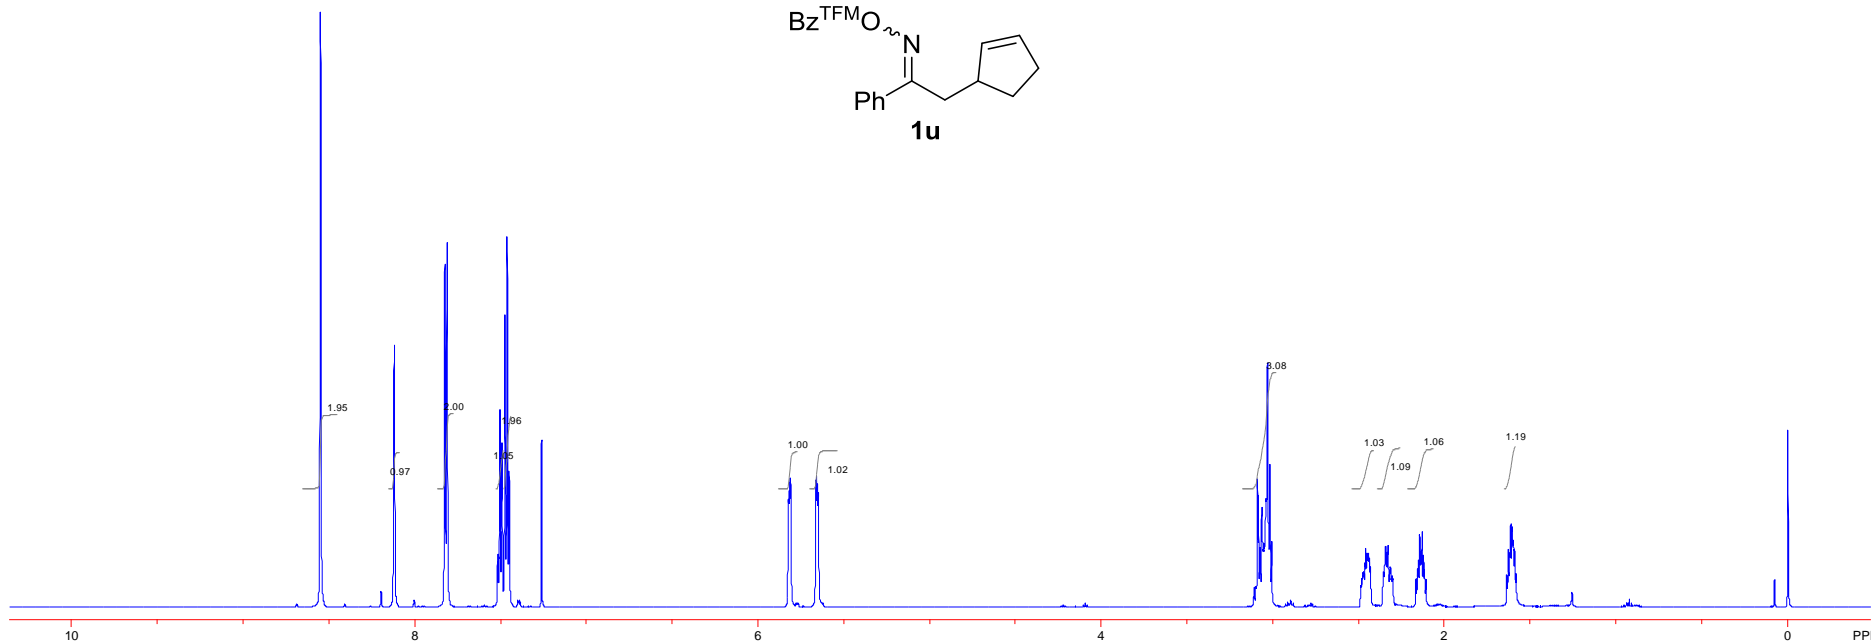

$^{13}\text{C}$  NMR (151 MHz,  $\text{CDCl}_3$ )

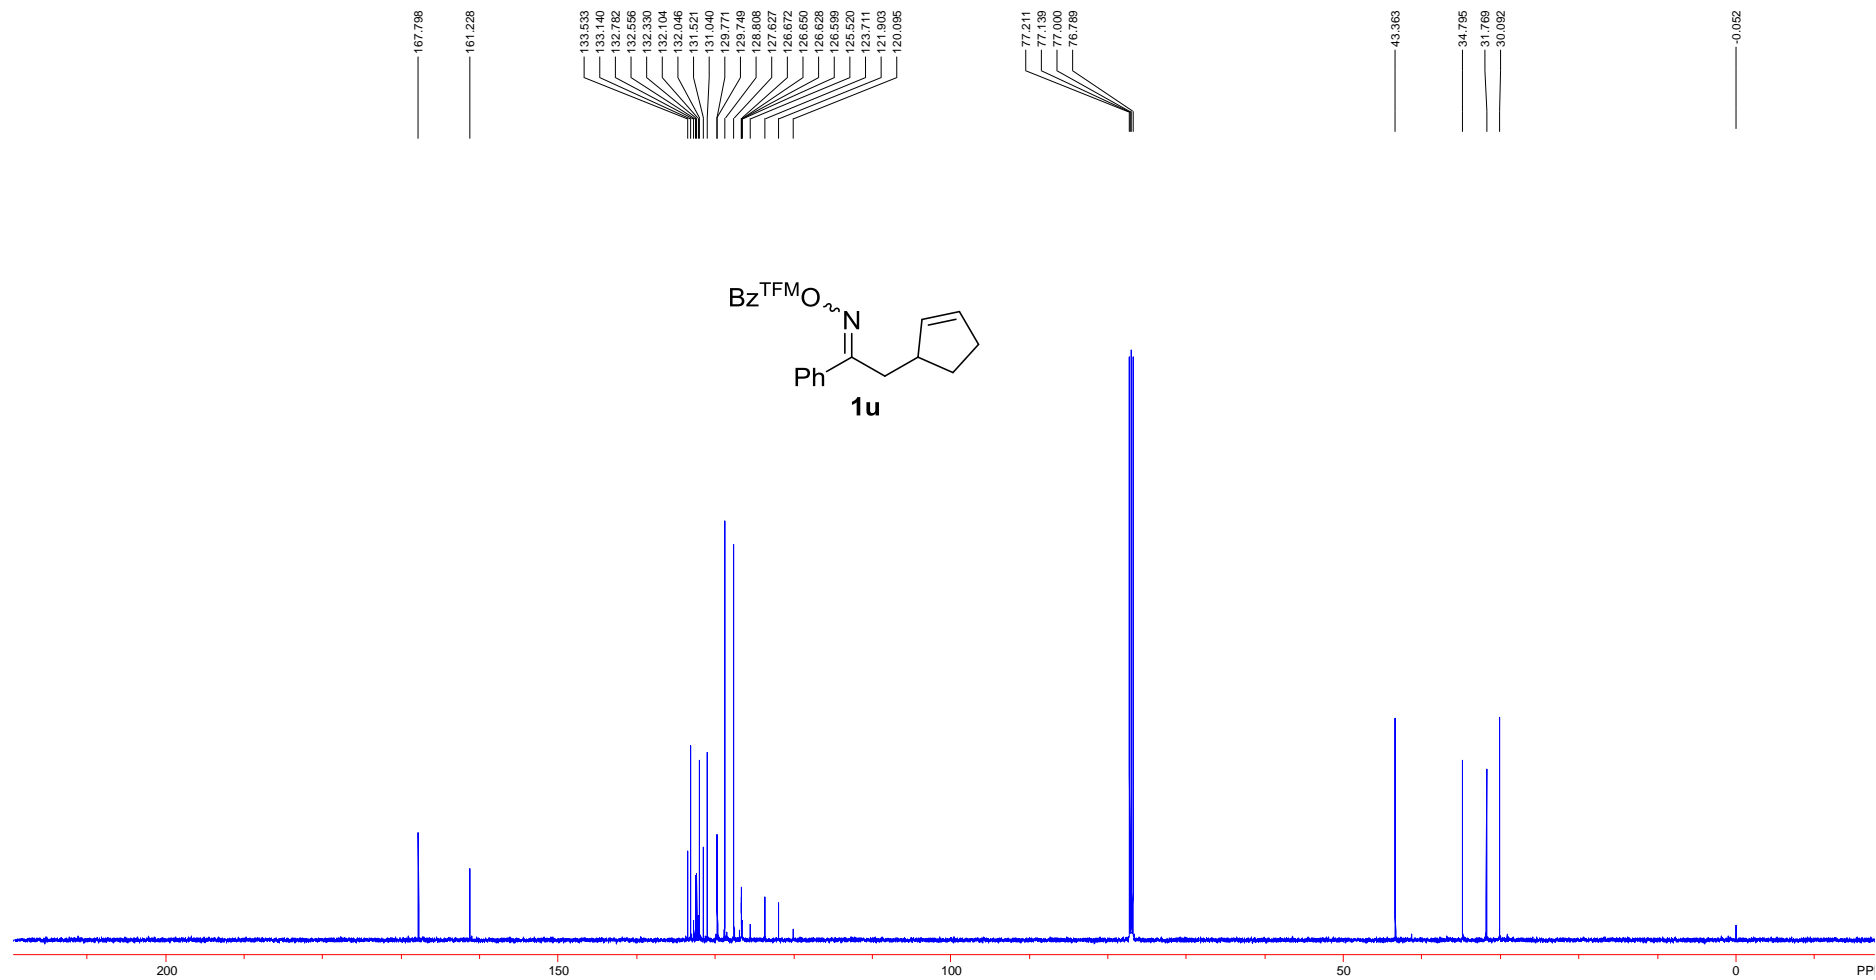

$^1\text{H}$  NMR(400 MHz,  $\text{CDCl}_3$ )

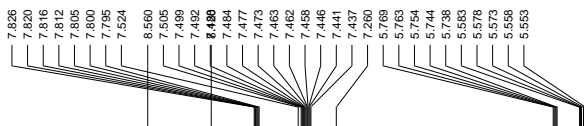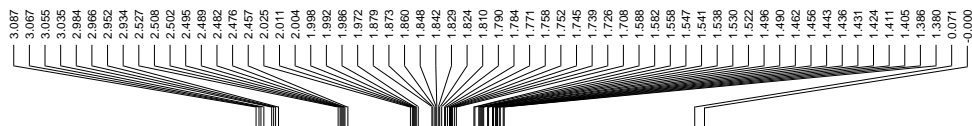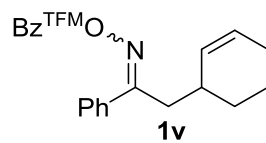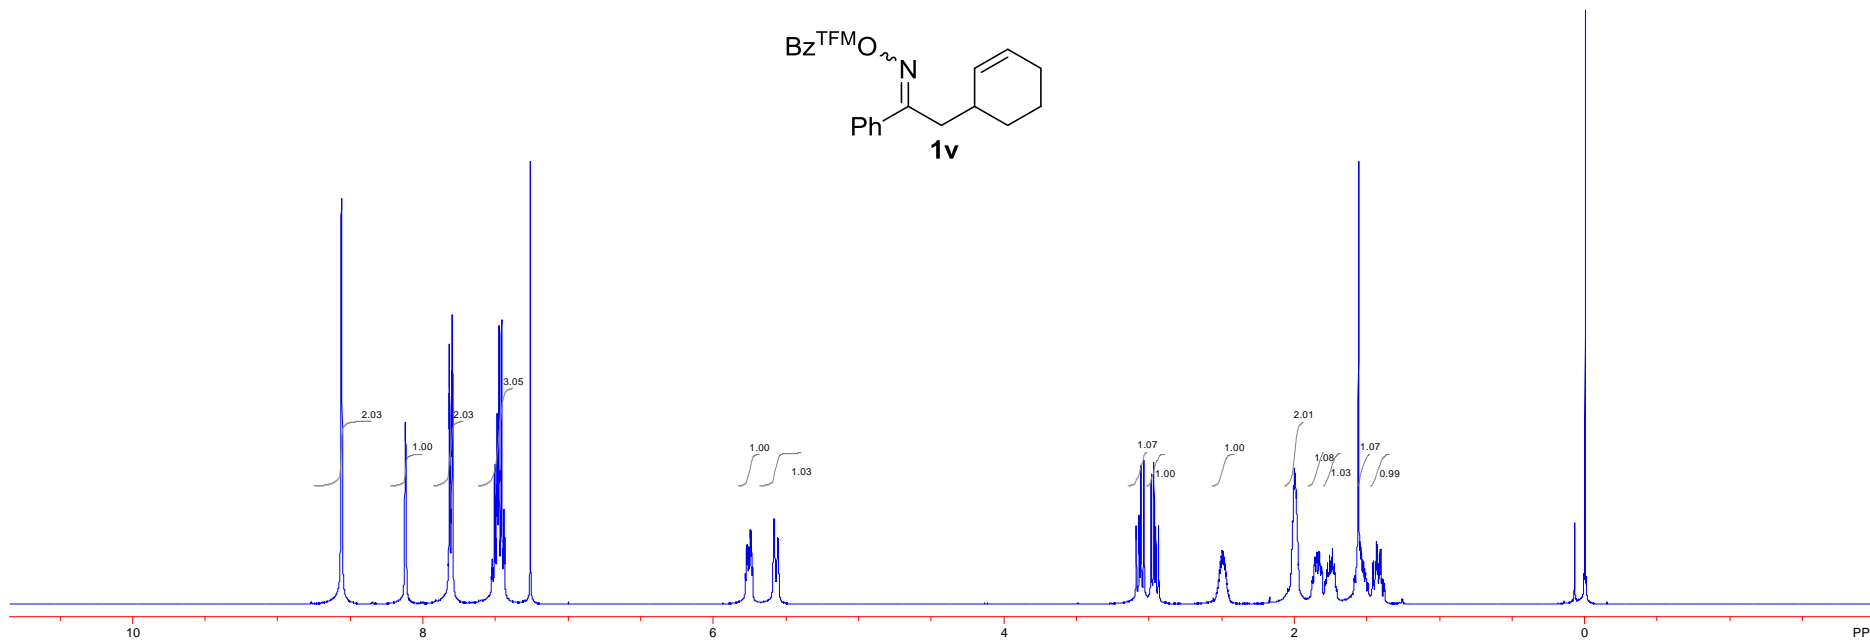



$^{13}\text{C}$  NMR (151 MHz,  $\text{CDCl}_3$ )

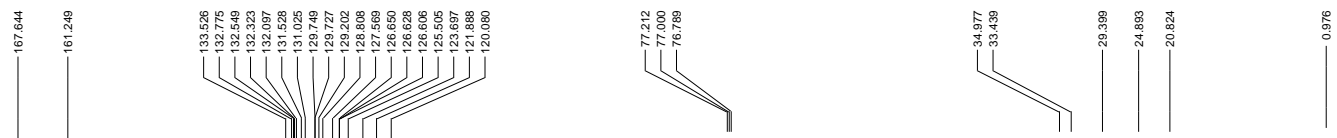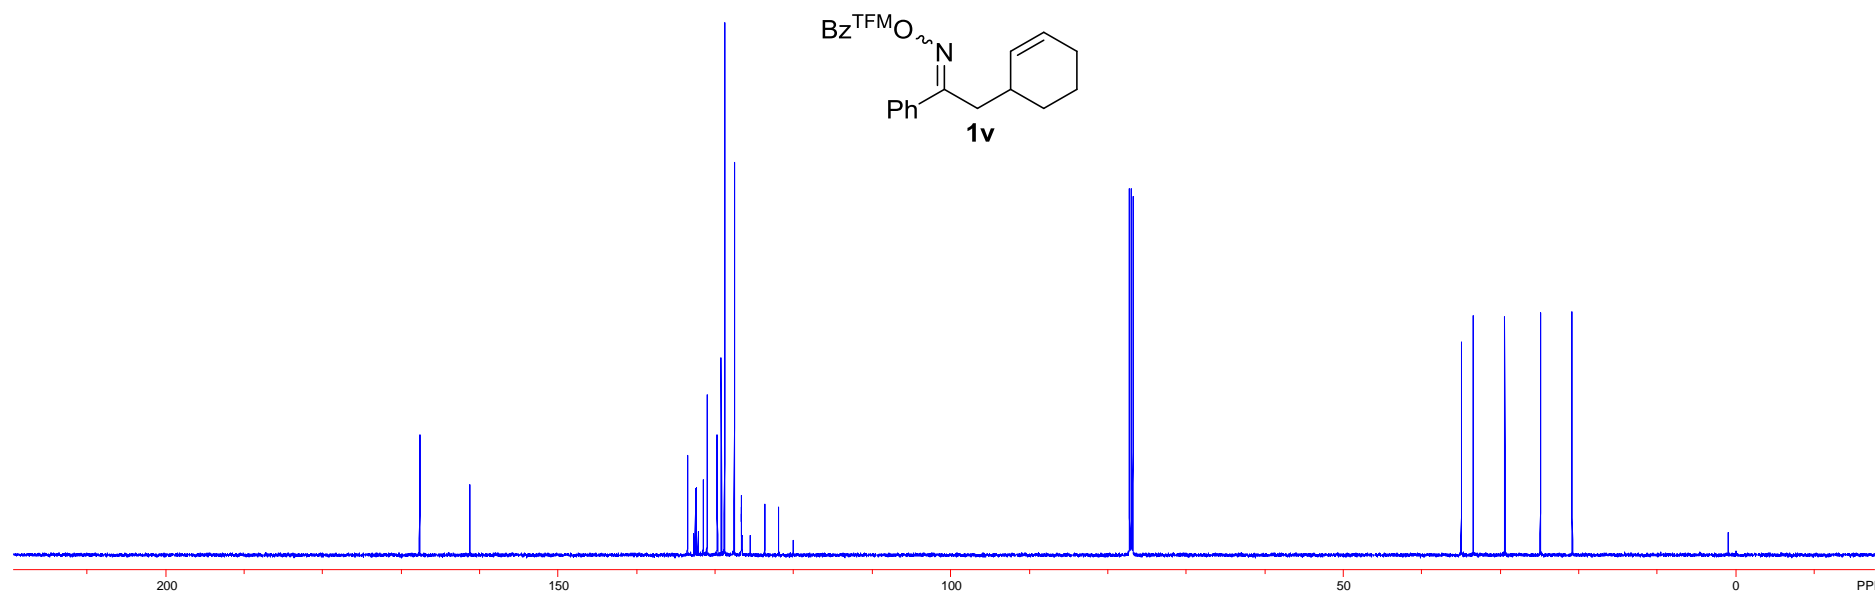

$^1\text{H}$  NMR(600 MHz,  $\text{CDCl}_3$ )

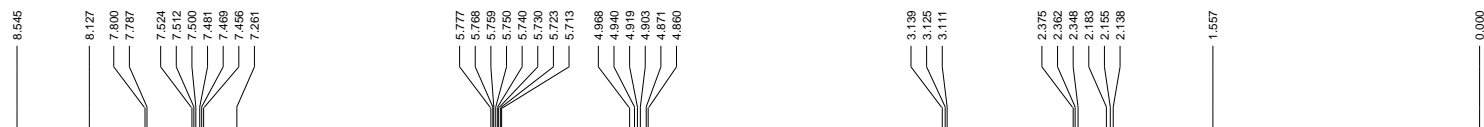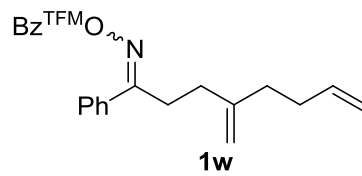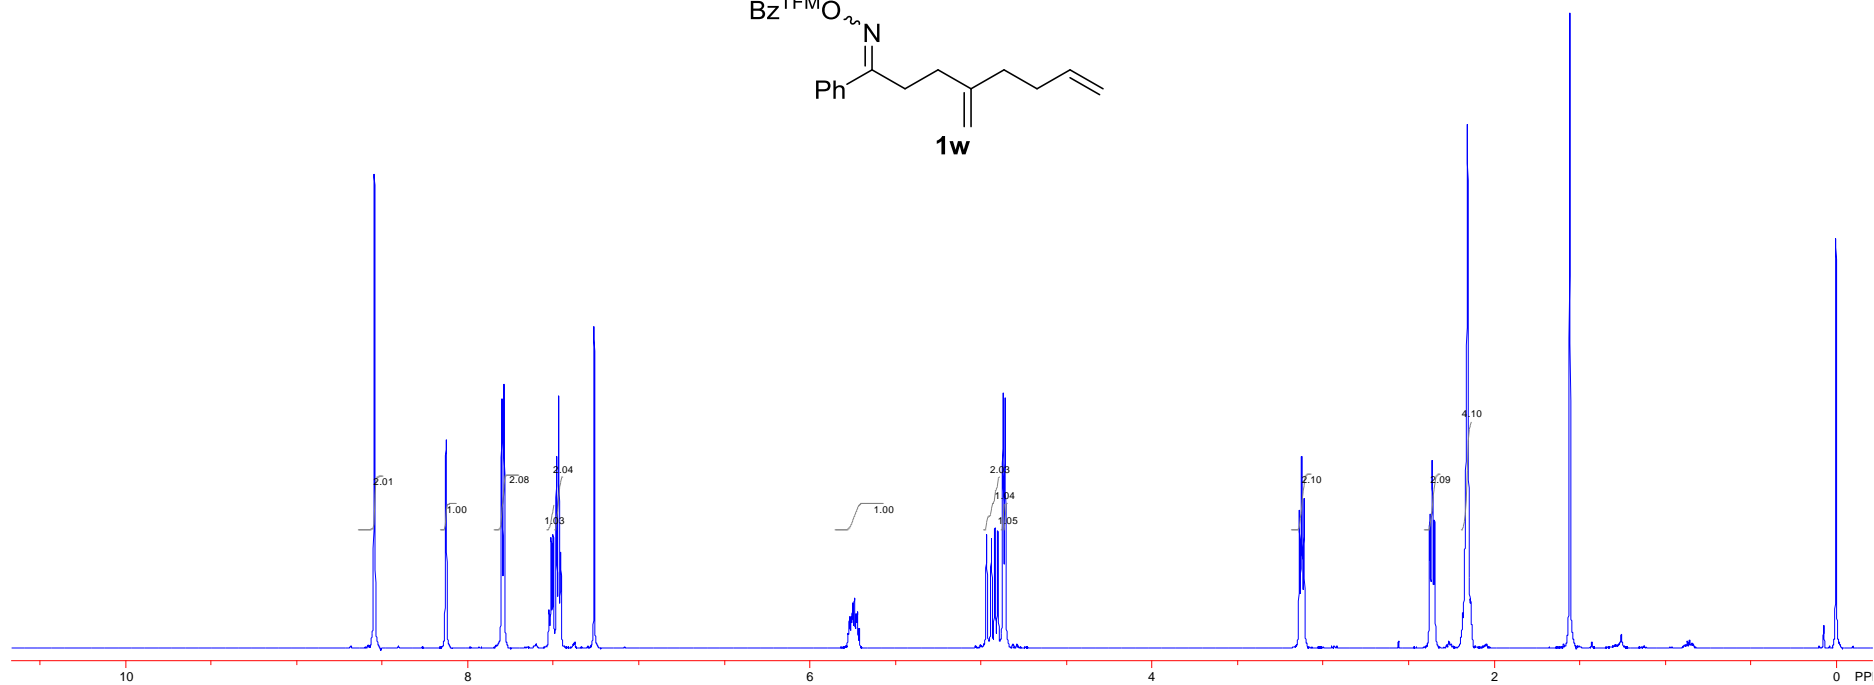

$^{13}\text{C}$  NMR (151 MHz,  $\text{CDCl}_3$ )

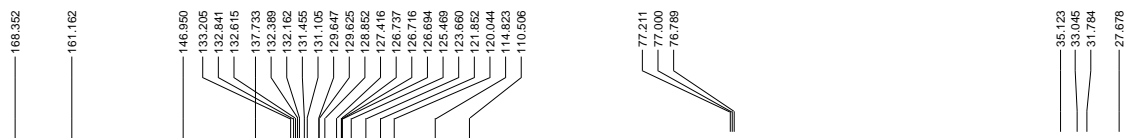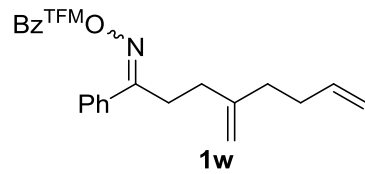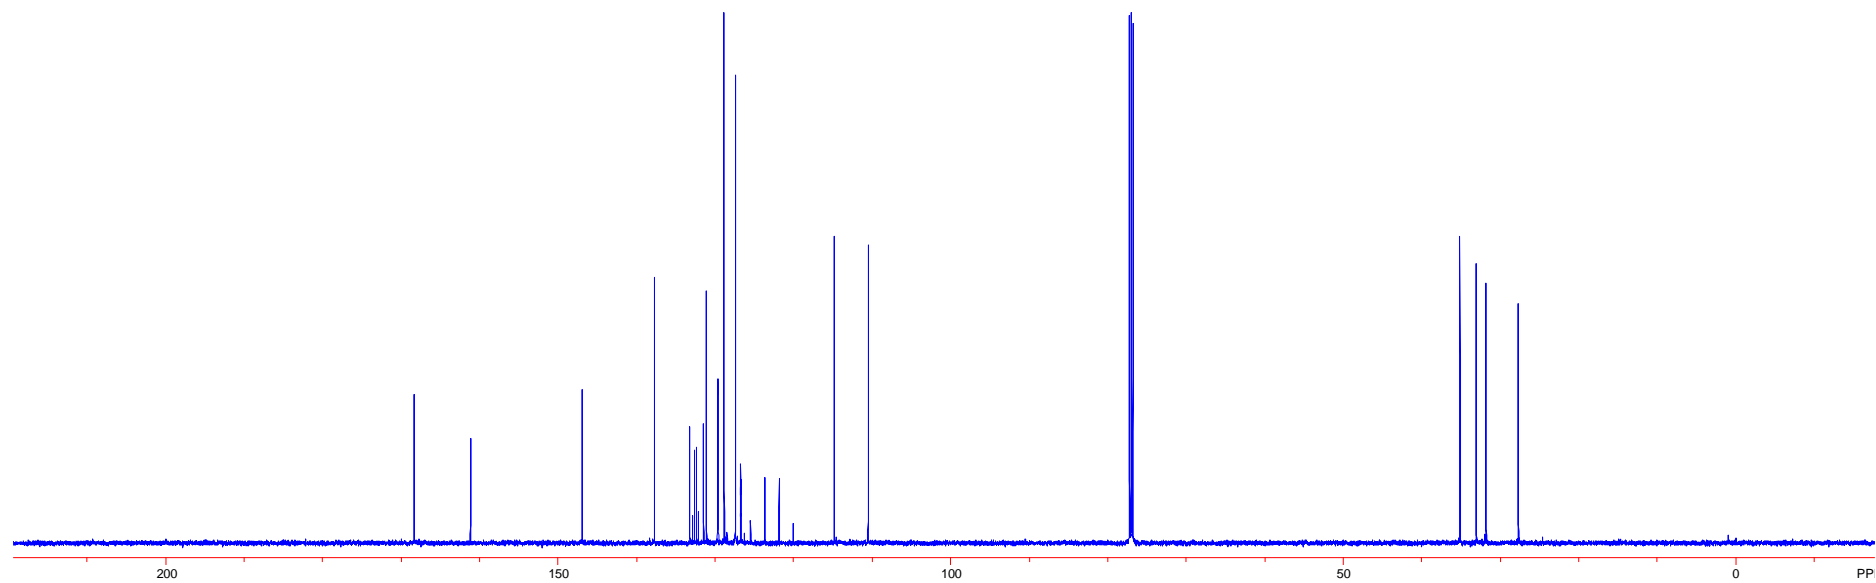

$^1\text{H}$  NMR(600 MHz,  $\text{CDCl}_3$ )

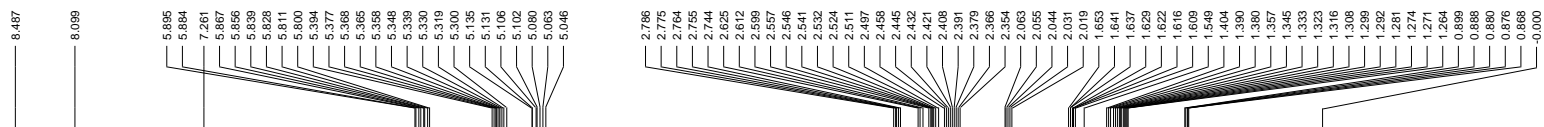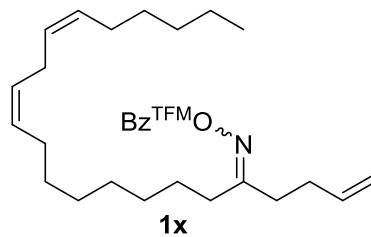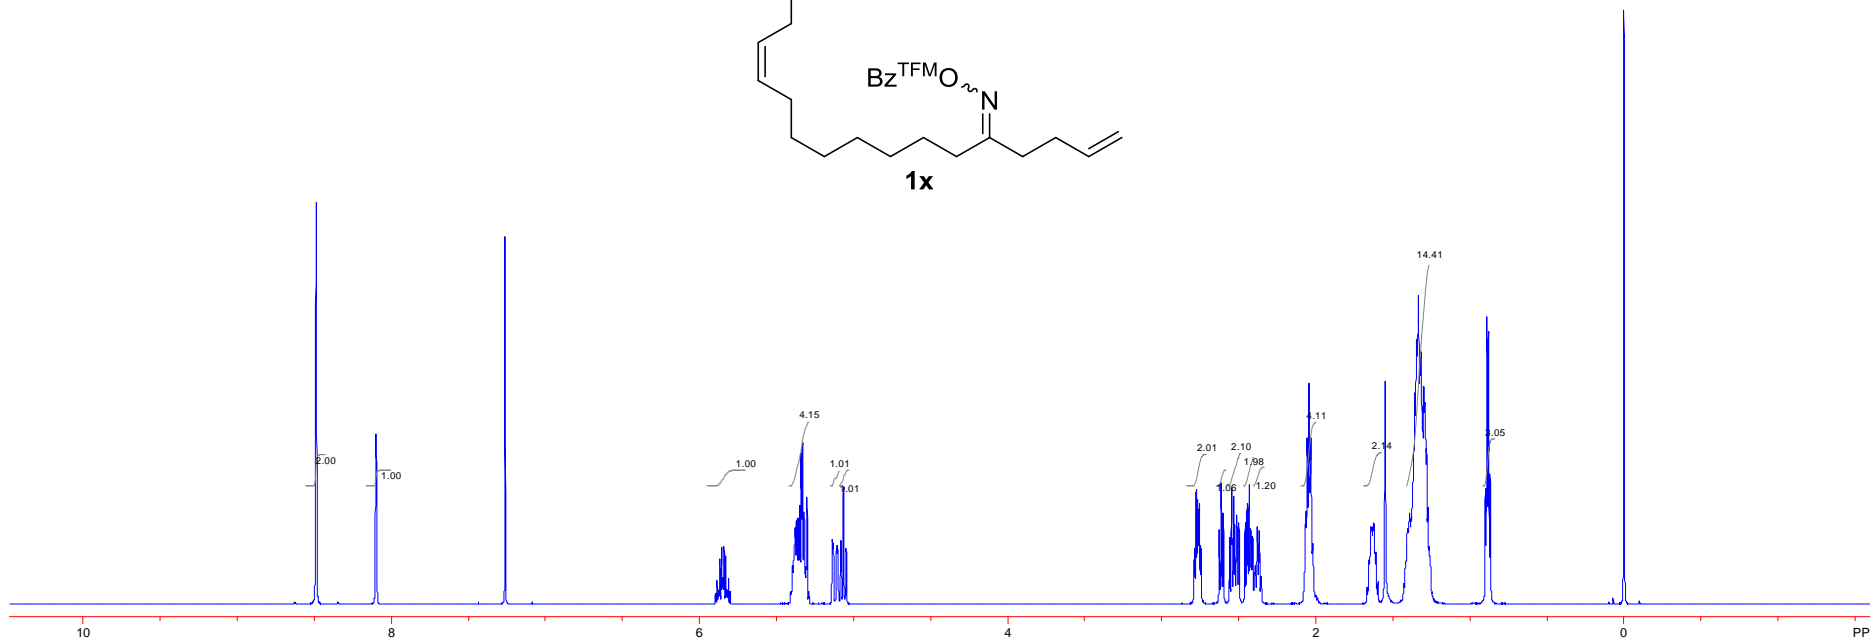

$^{13}\text{C}$  NMR (151 MHz,  $\text{CDCl}_3$ )

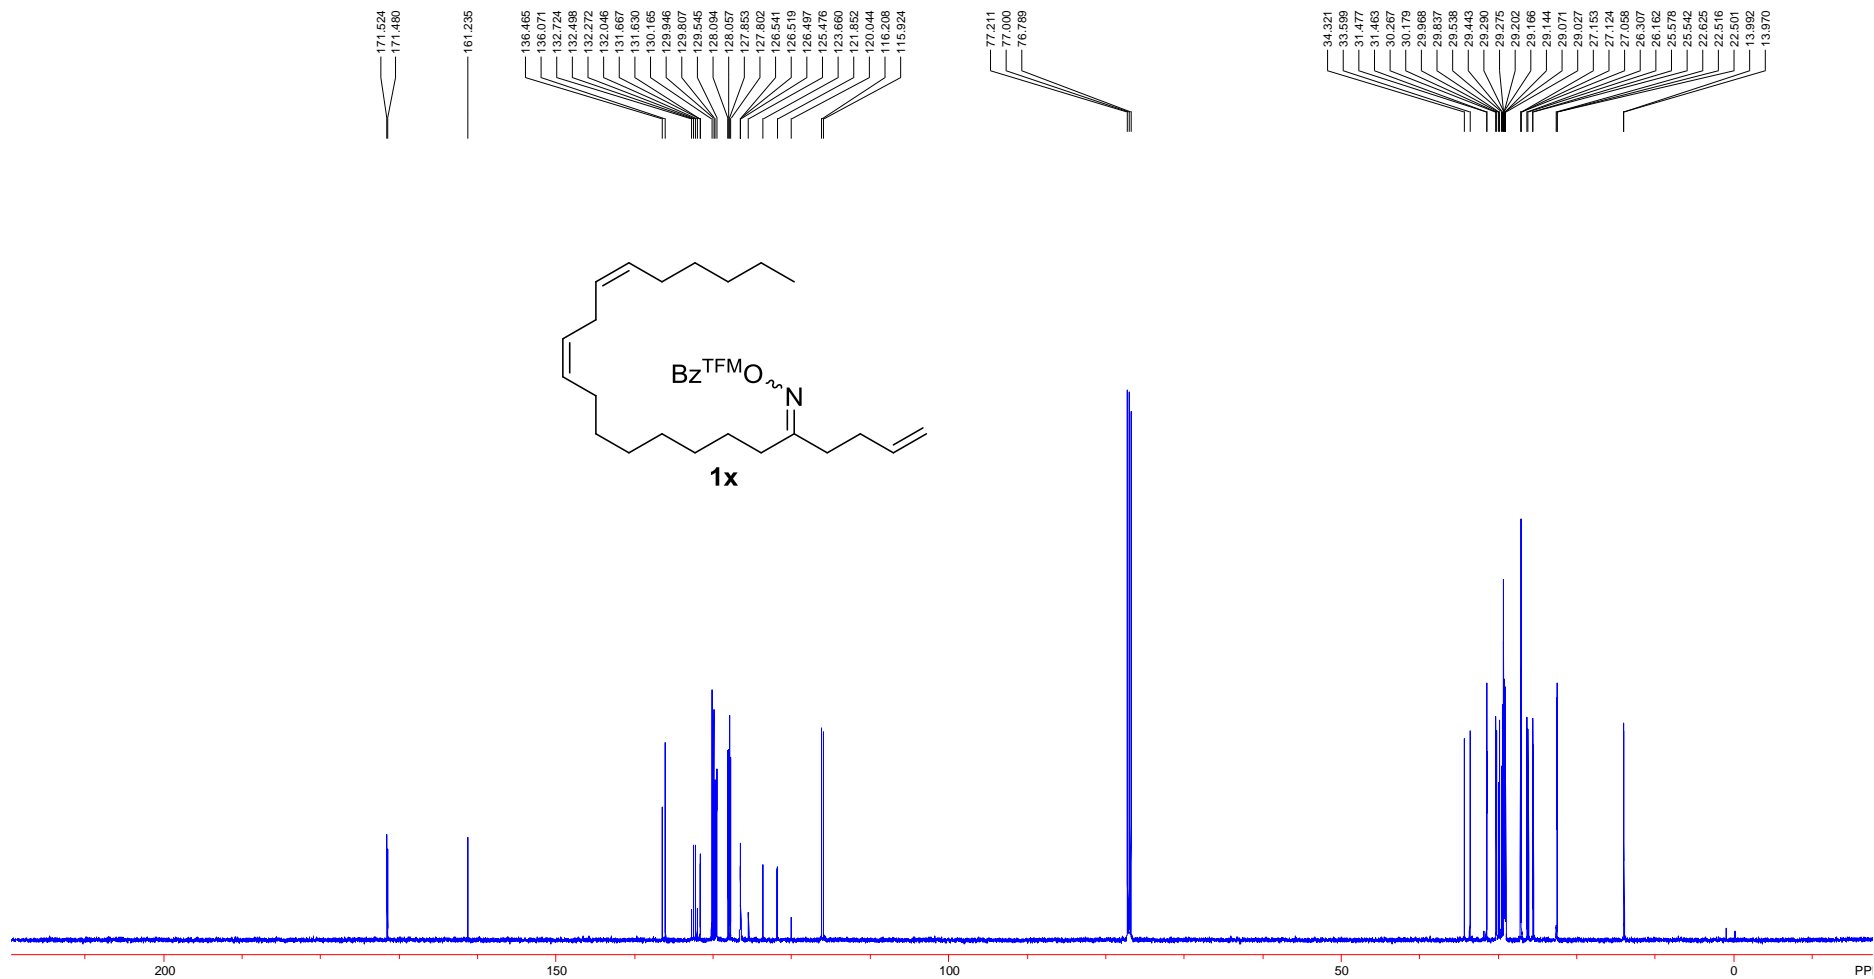

$^1\text{H}$  NMR(400 MHz,  $\text{CDCl}_3$ )

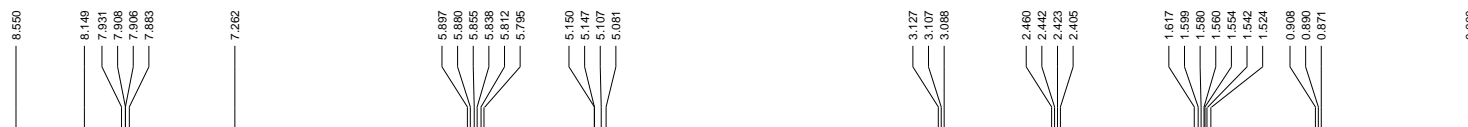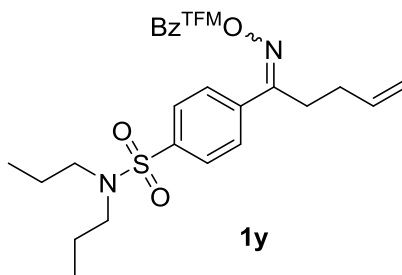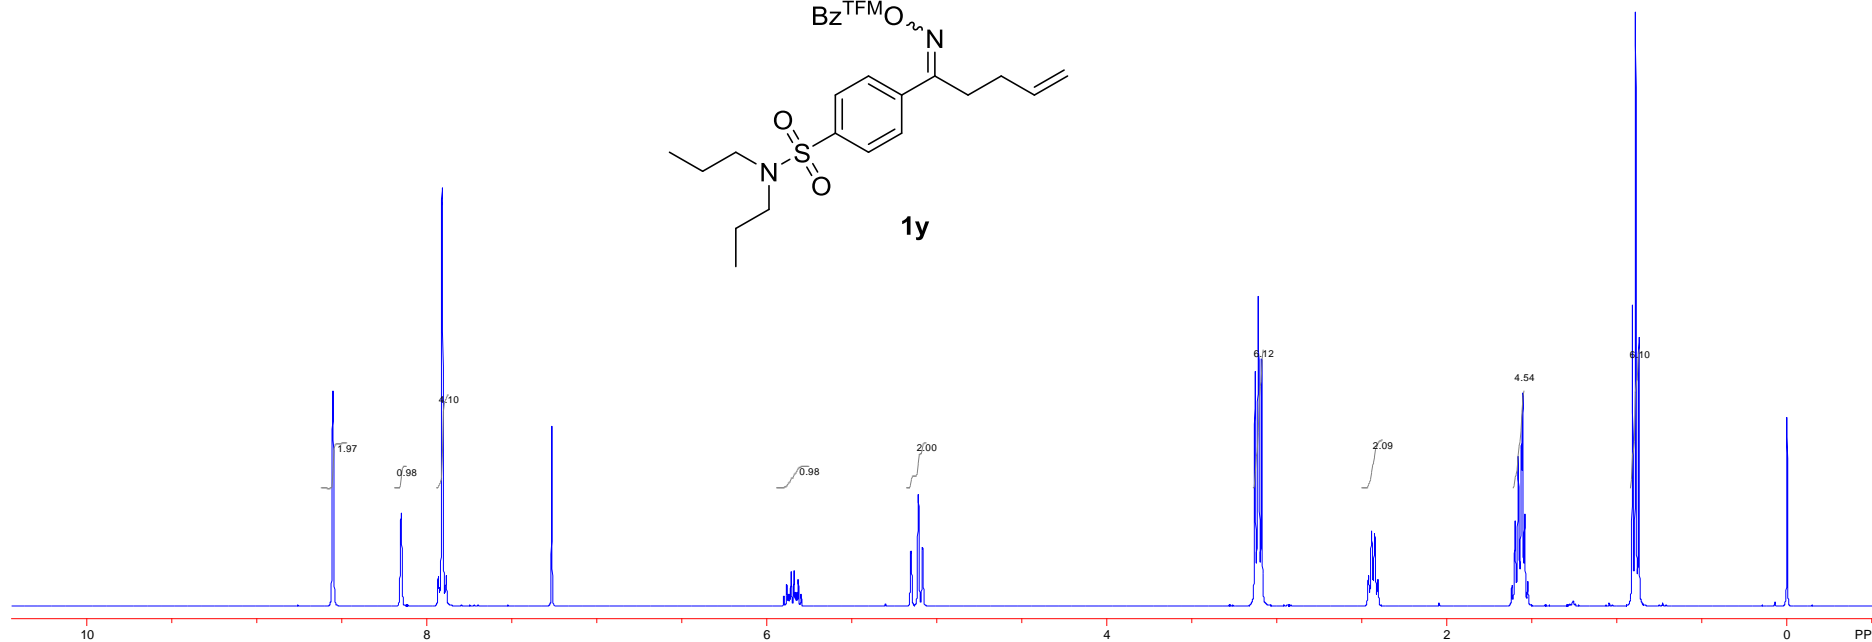

$^{13}\text{C}$  NMR (151 MHz,  $\text{CDCl}_3$ )

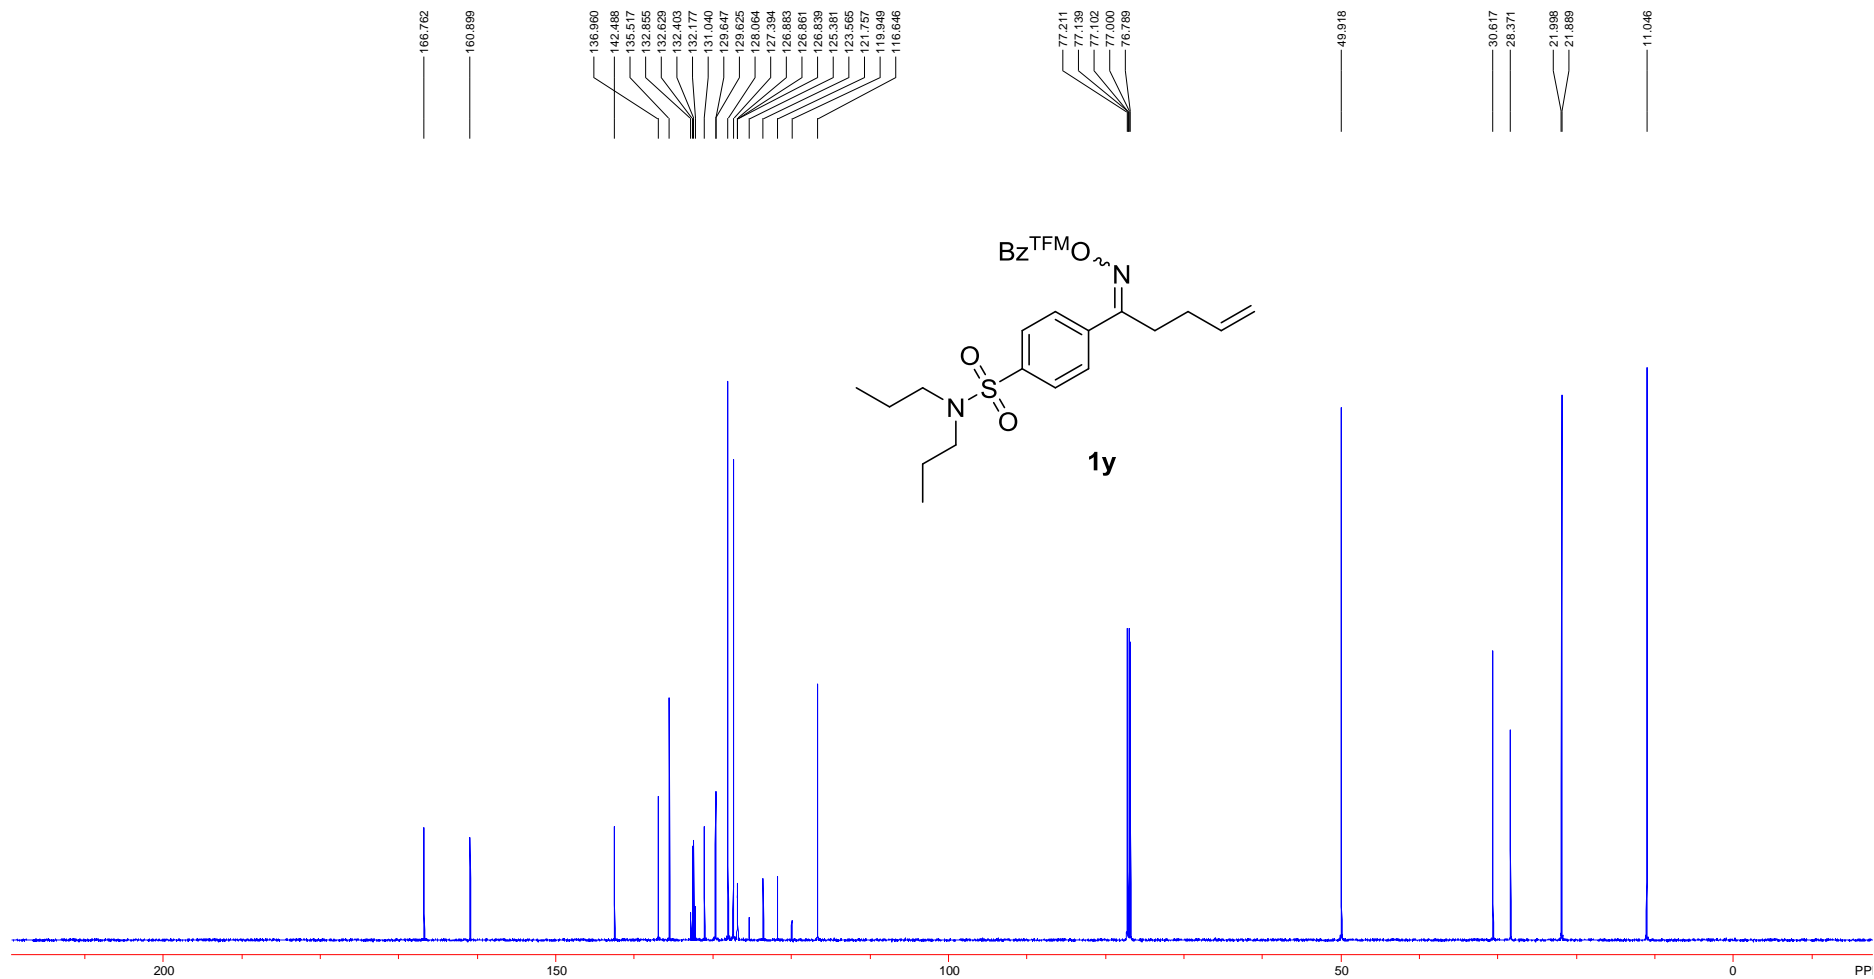

$^1\text{H}$  NMR(600 MHz,  $\text{CDCl}_3$ )

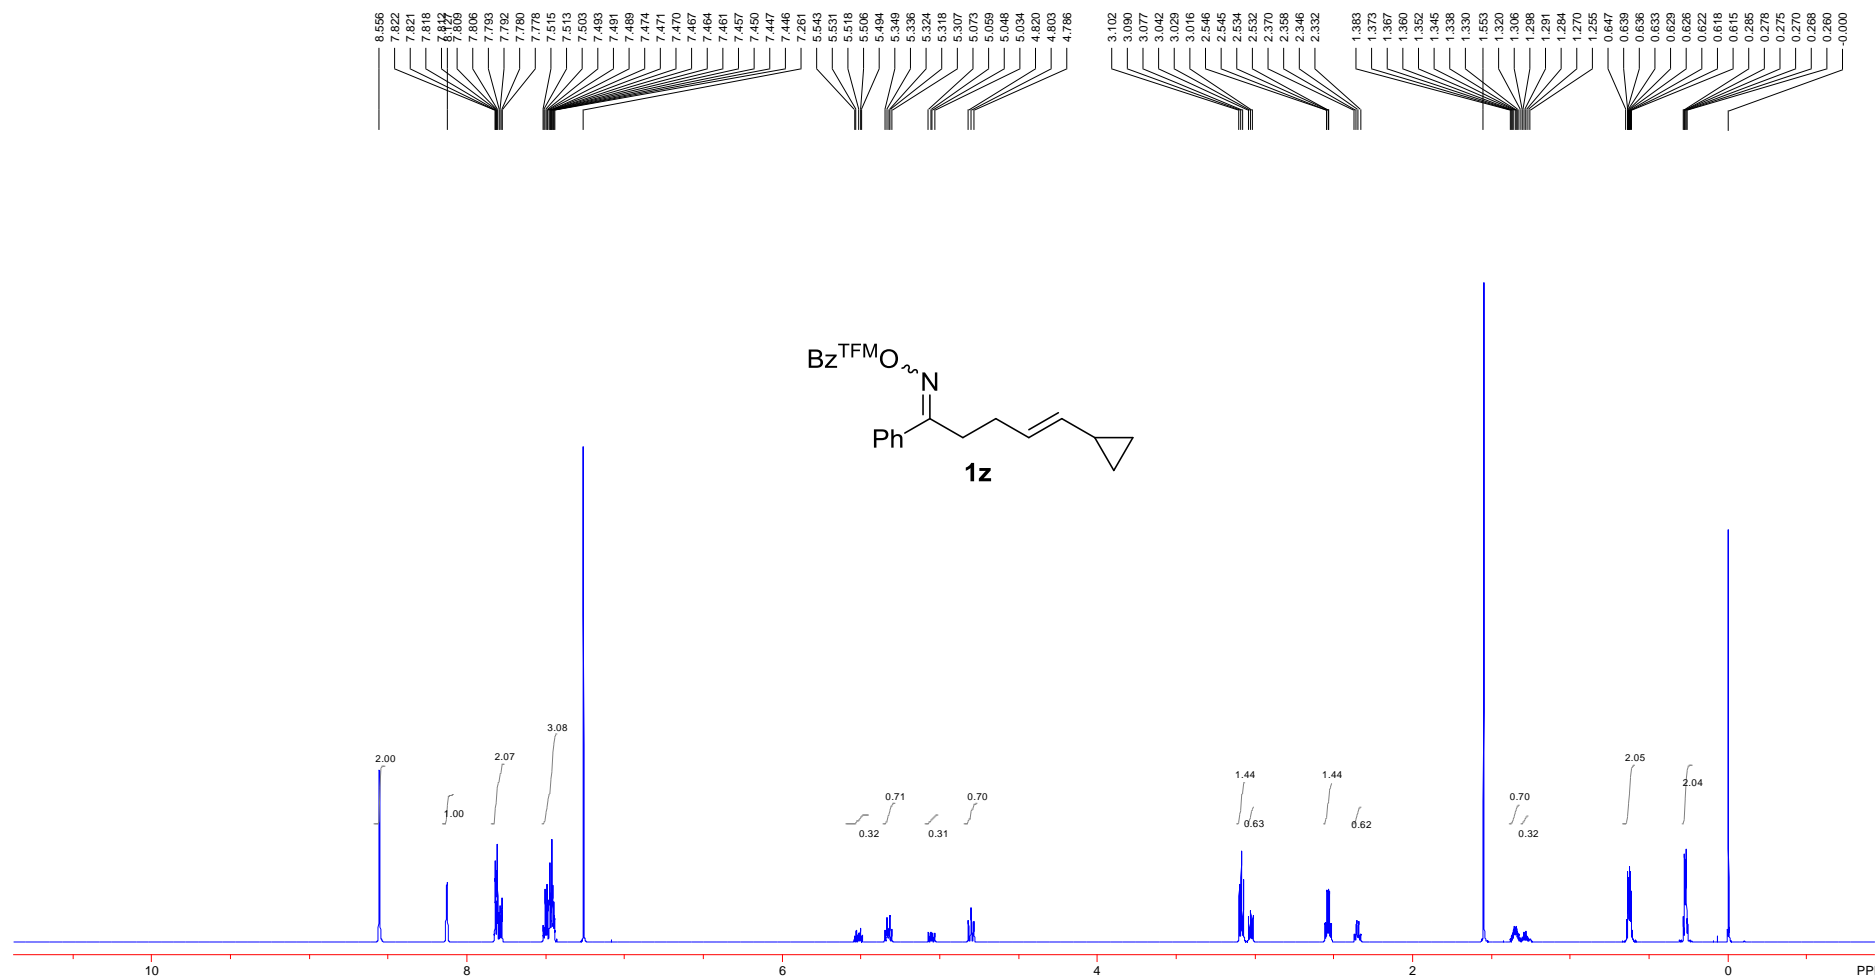



$^{13}\text{C}$  NMR (151 MHz,  $\text{CDCl}_3$ )

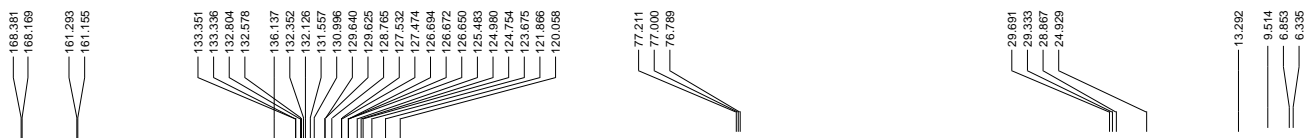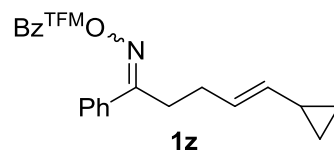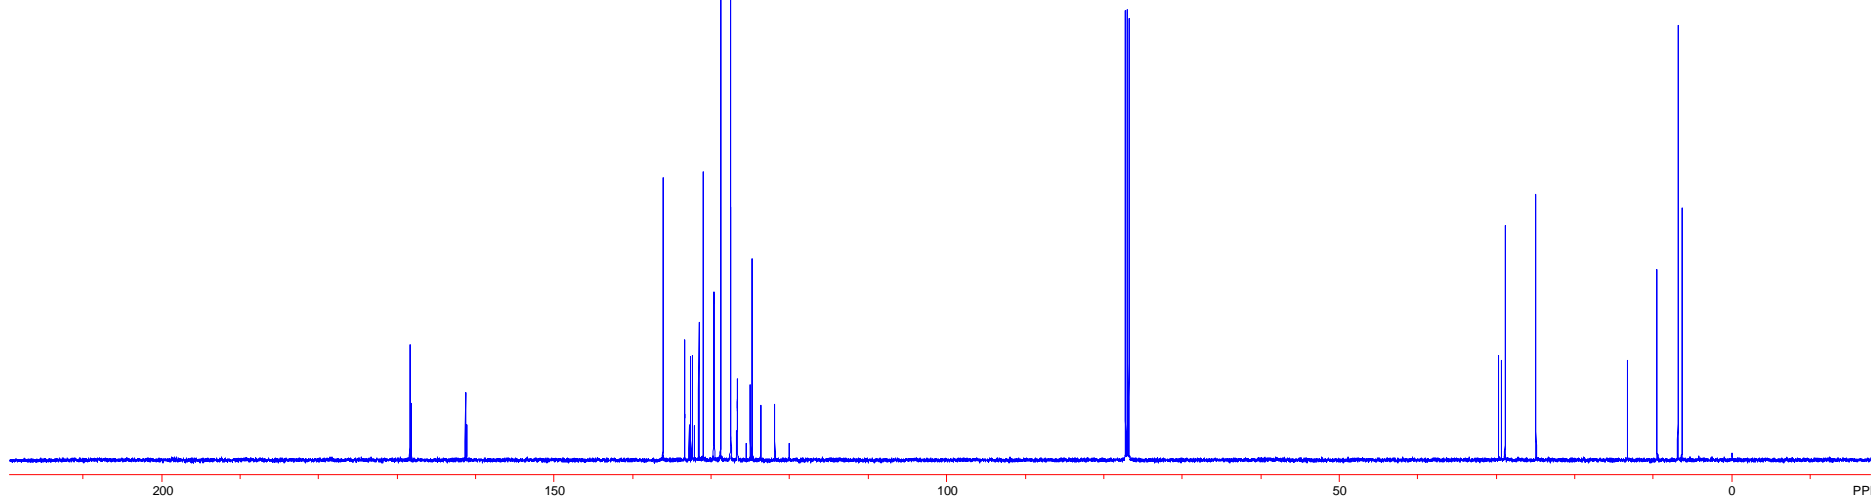

$^1\text{H}$  NMR(400 MHz,  $\text{CDCl}_3$ )

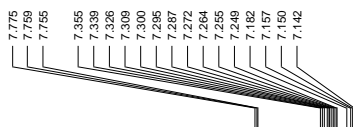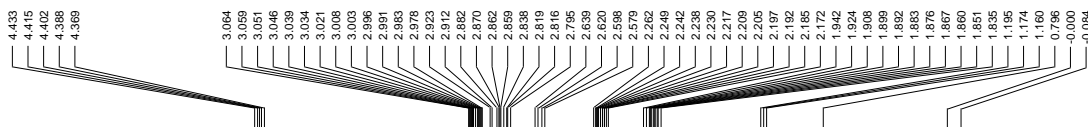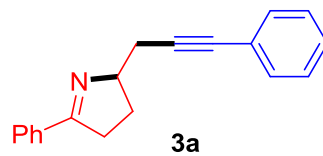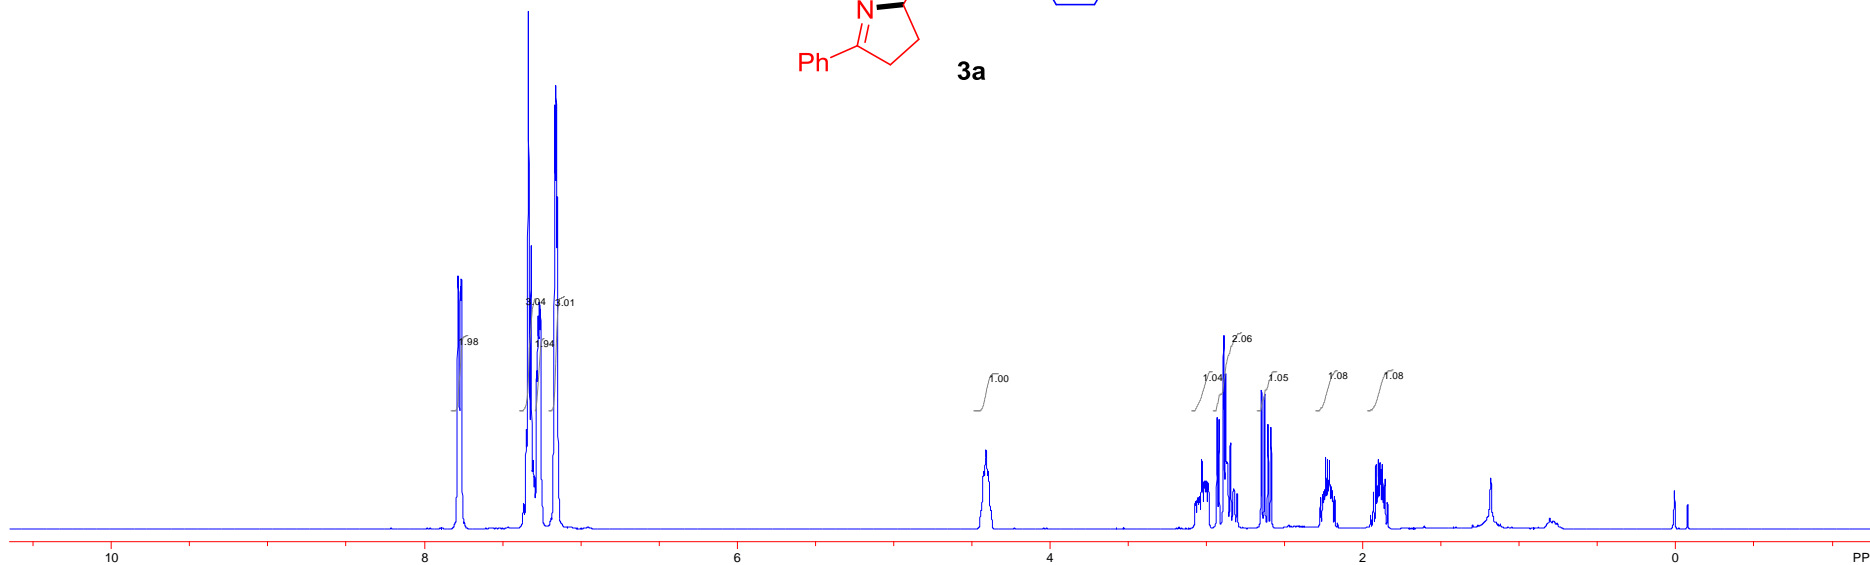

$^{13}\text{C}$  NMR (100 MHz,  $\text{CDCl}_3$ )

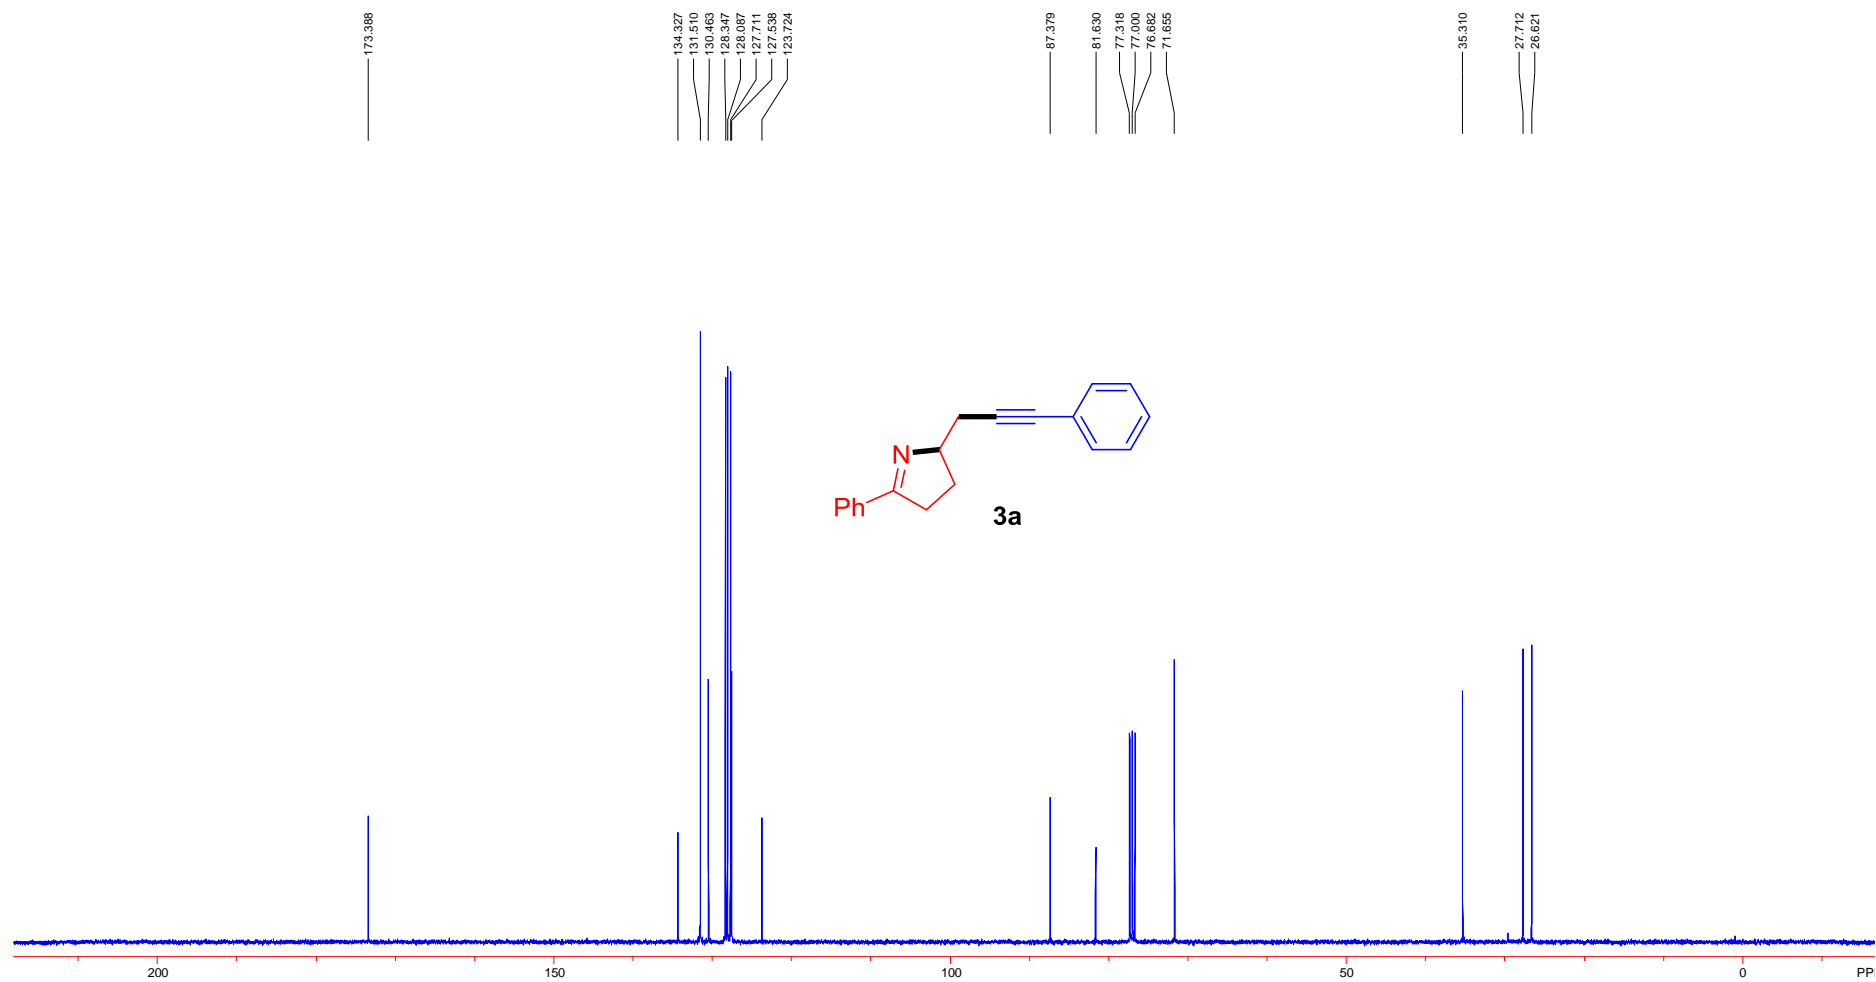

$^1\text{H}$  NMR(400 MHz,  $\text{CDCl}_3$ )

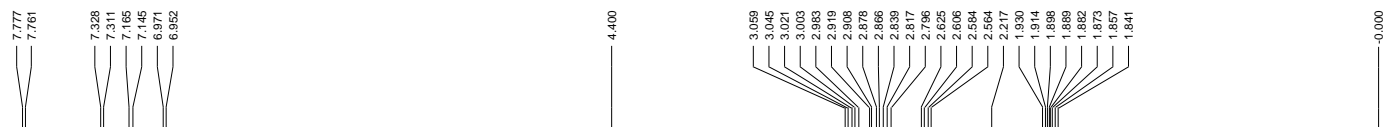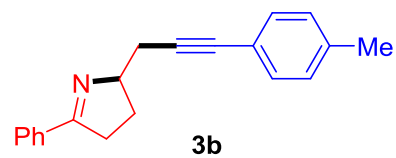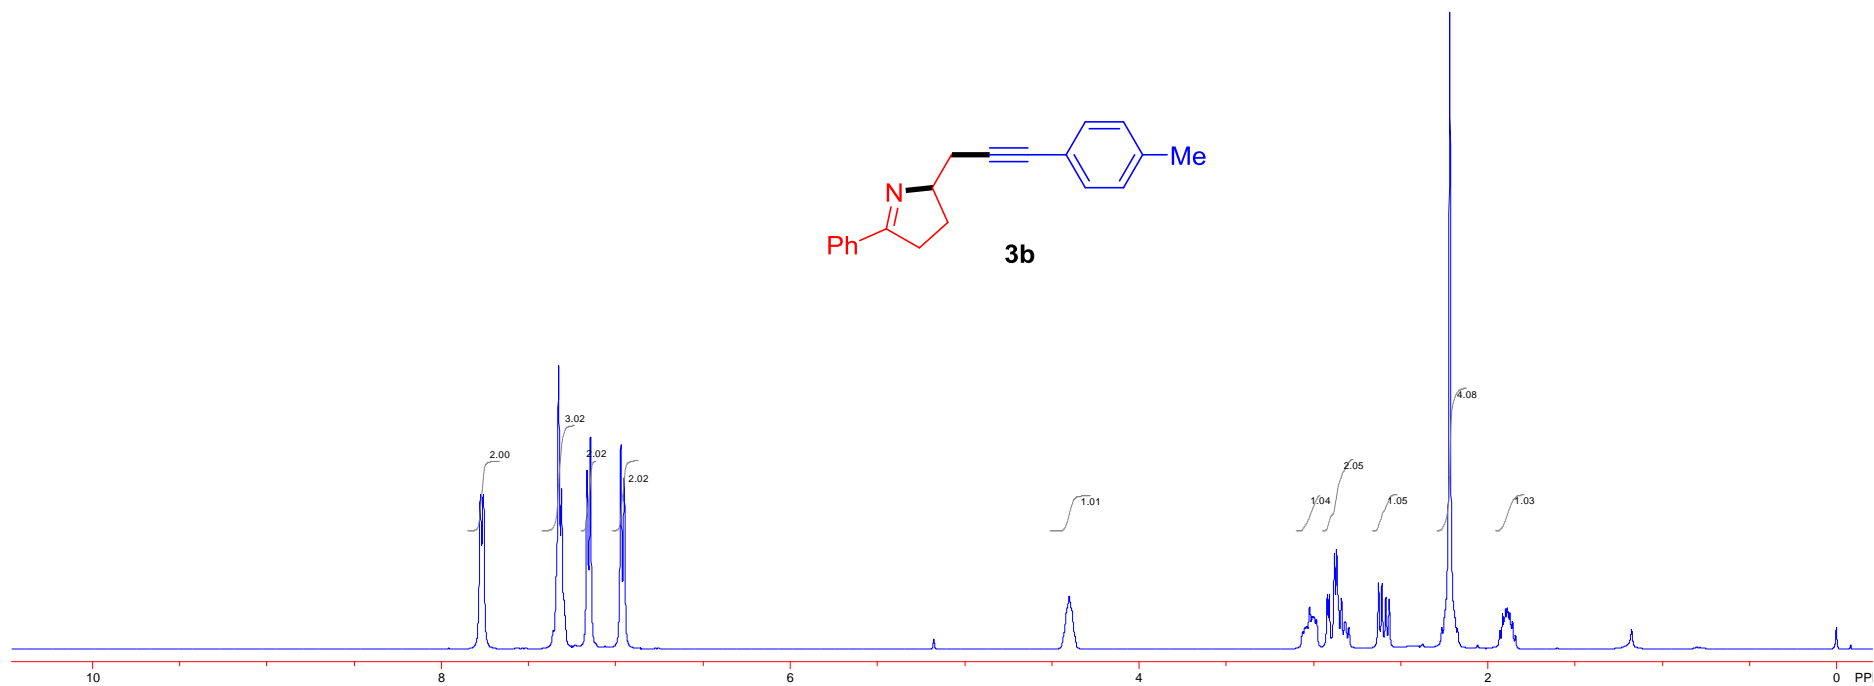

$^{13}\text{C}$  NMR (100 MHz,  $\text{CDCl}_3$ )

173.366

137.520  
134.342  
131.395  
130.463  
128.852  
128.347  
127.733  
120.654

86.534  
81.659  
77.318  
77.000  
76.682  
71.720

35.296  
27.712  
26.643  
21.288

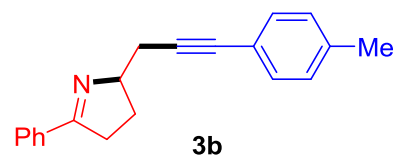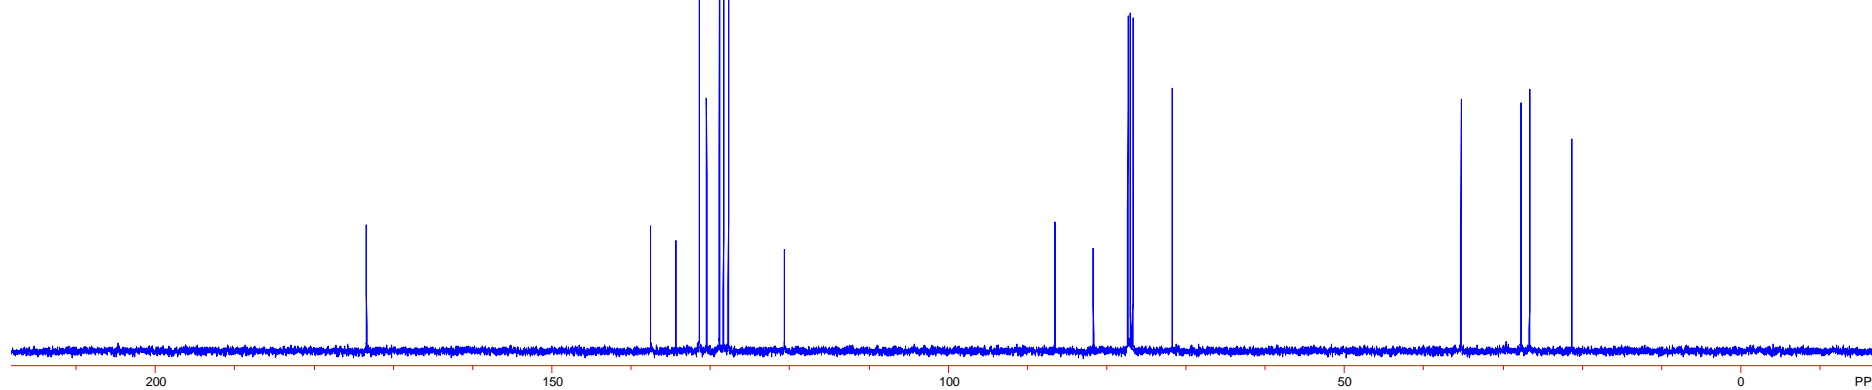

$^1\text{H NMR}$ (400 MHz,  $\text{CDCl}_3$ )

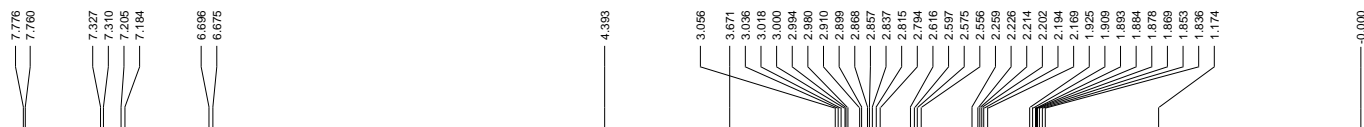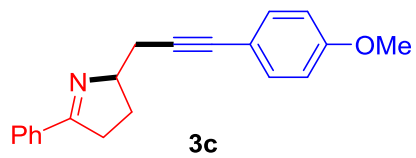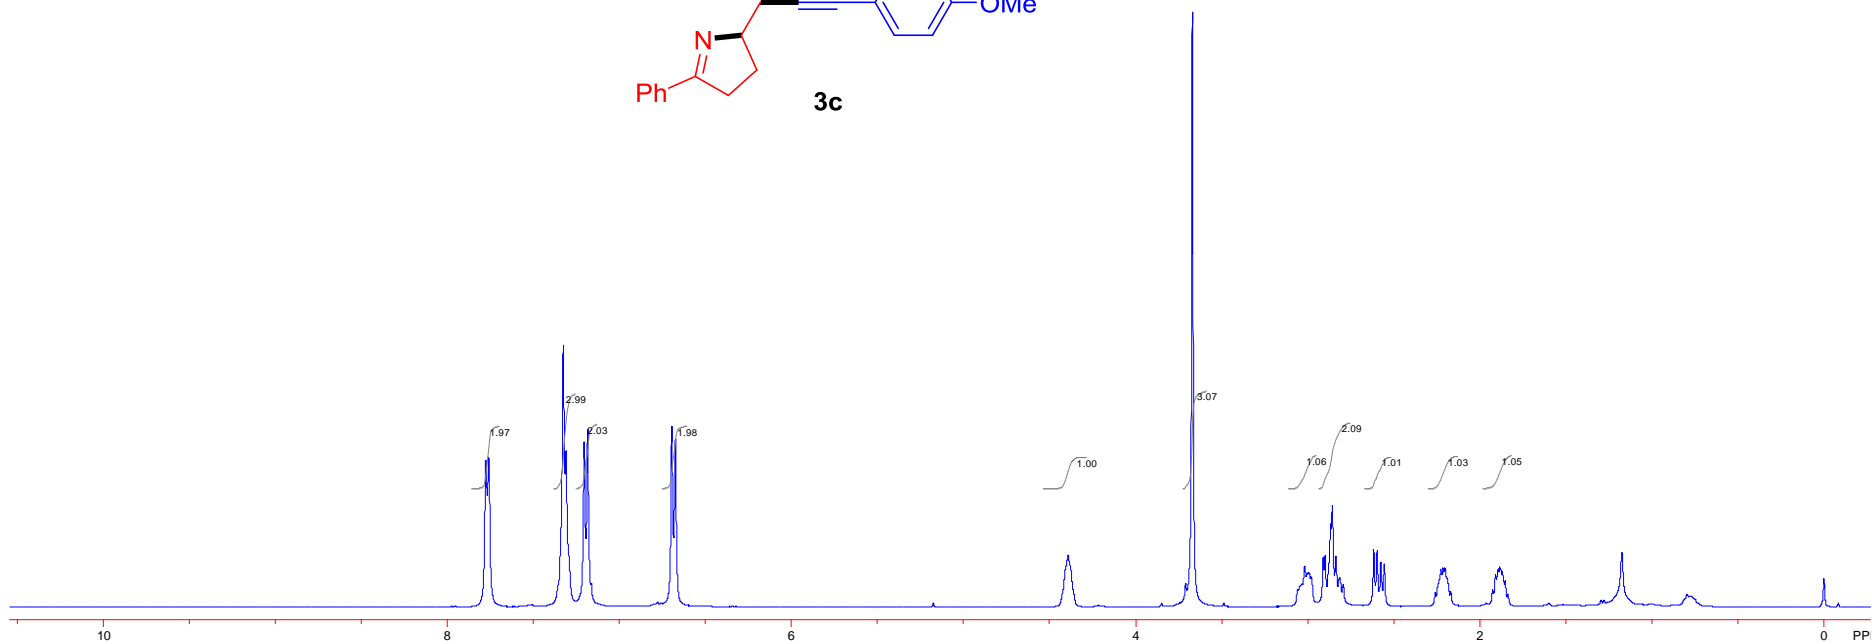

$^{13}\text{C}$  NMR (100 MHz,  $\text{CDCl}_3$ )

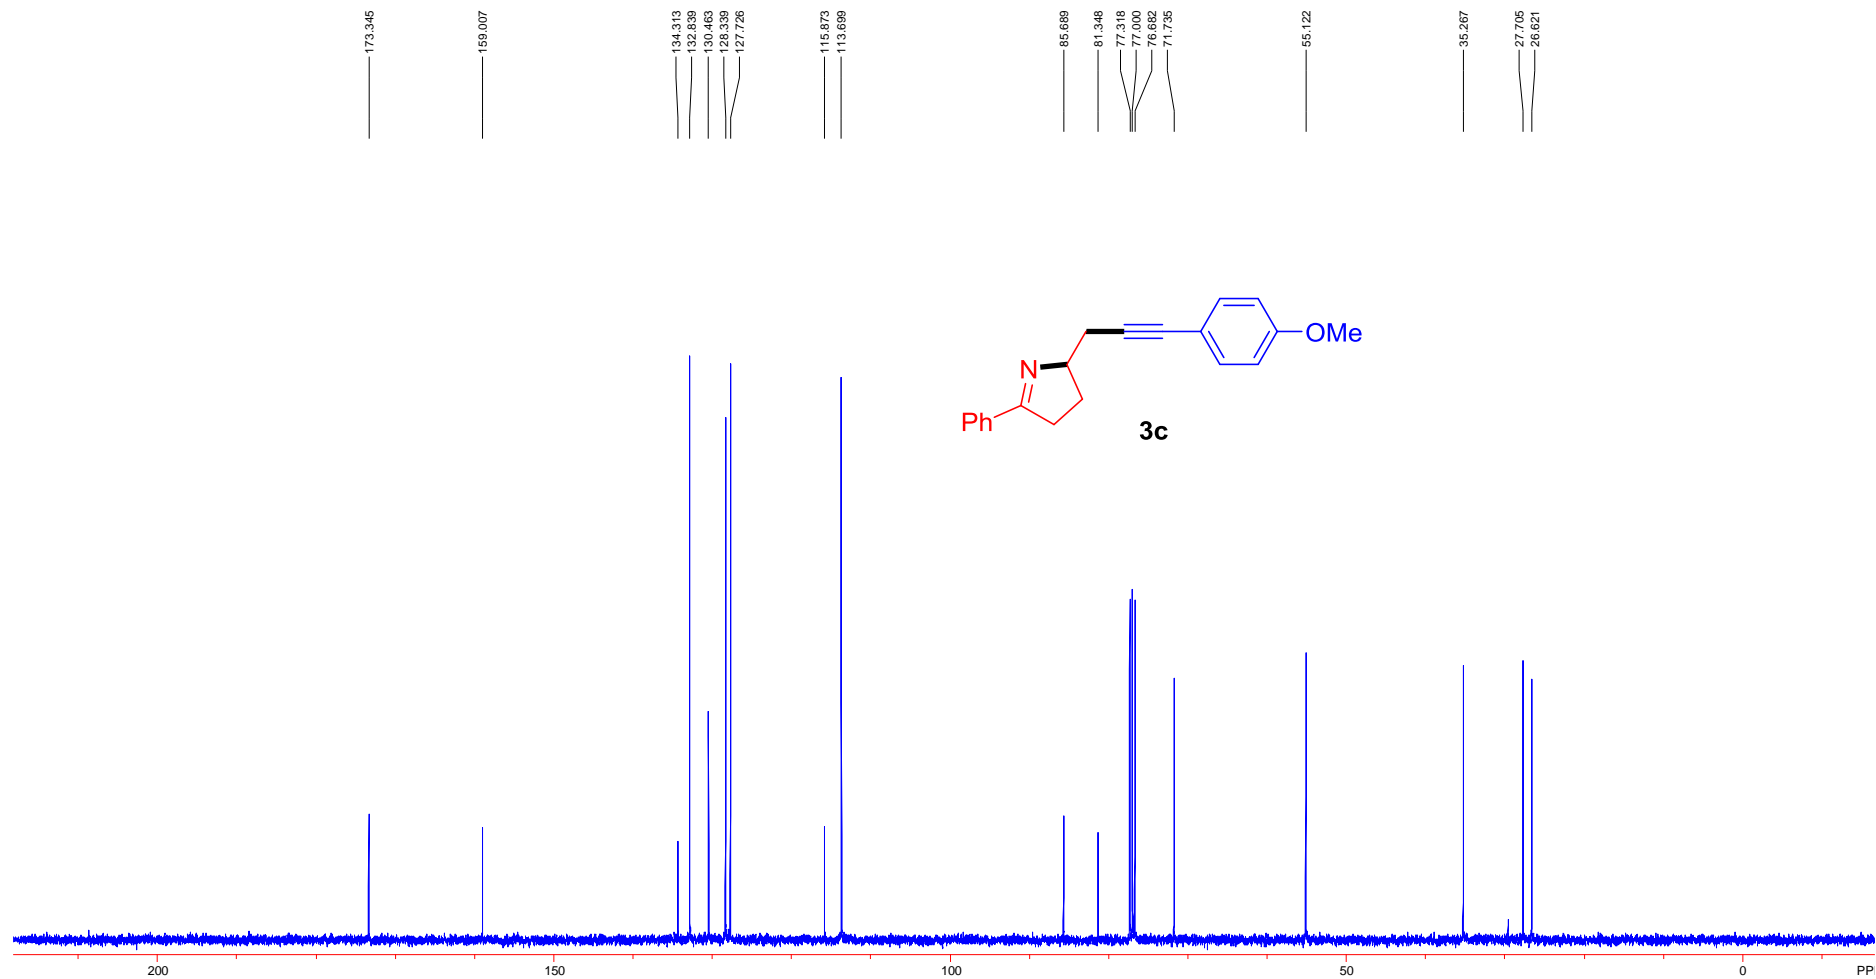

$^1\text{H}$  NMR(400 MHz,  $\text{CDCl}_3$ )

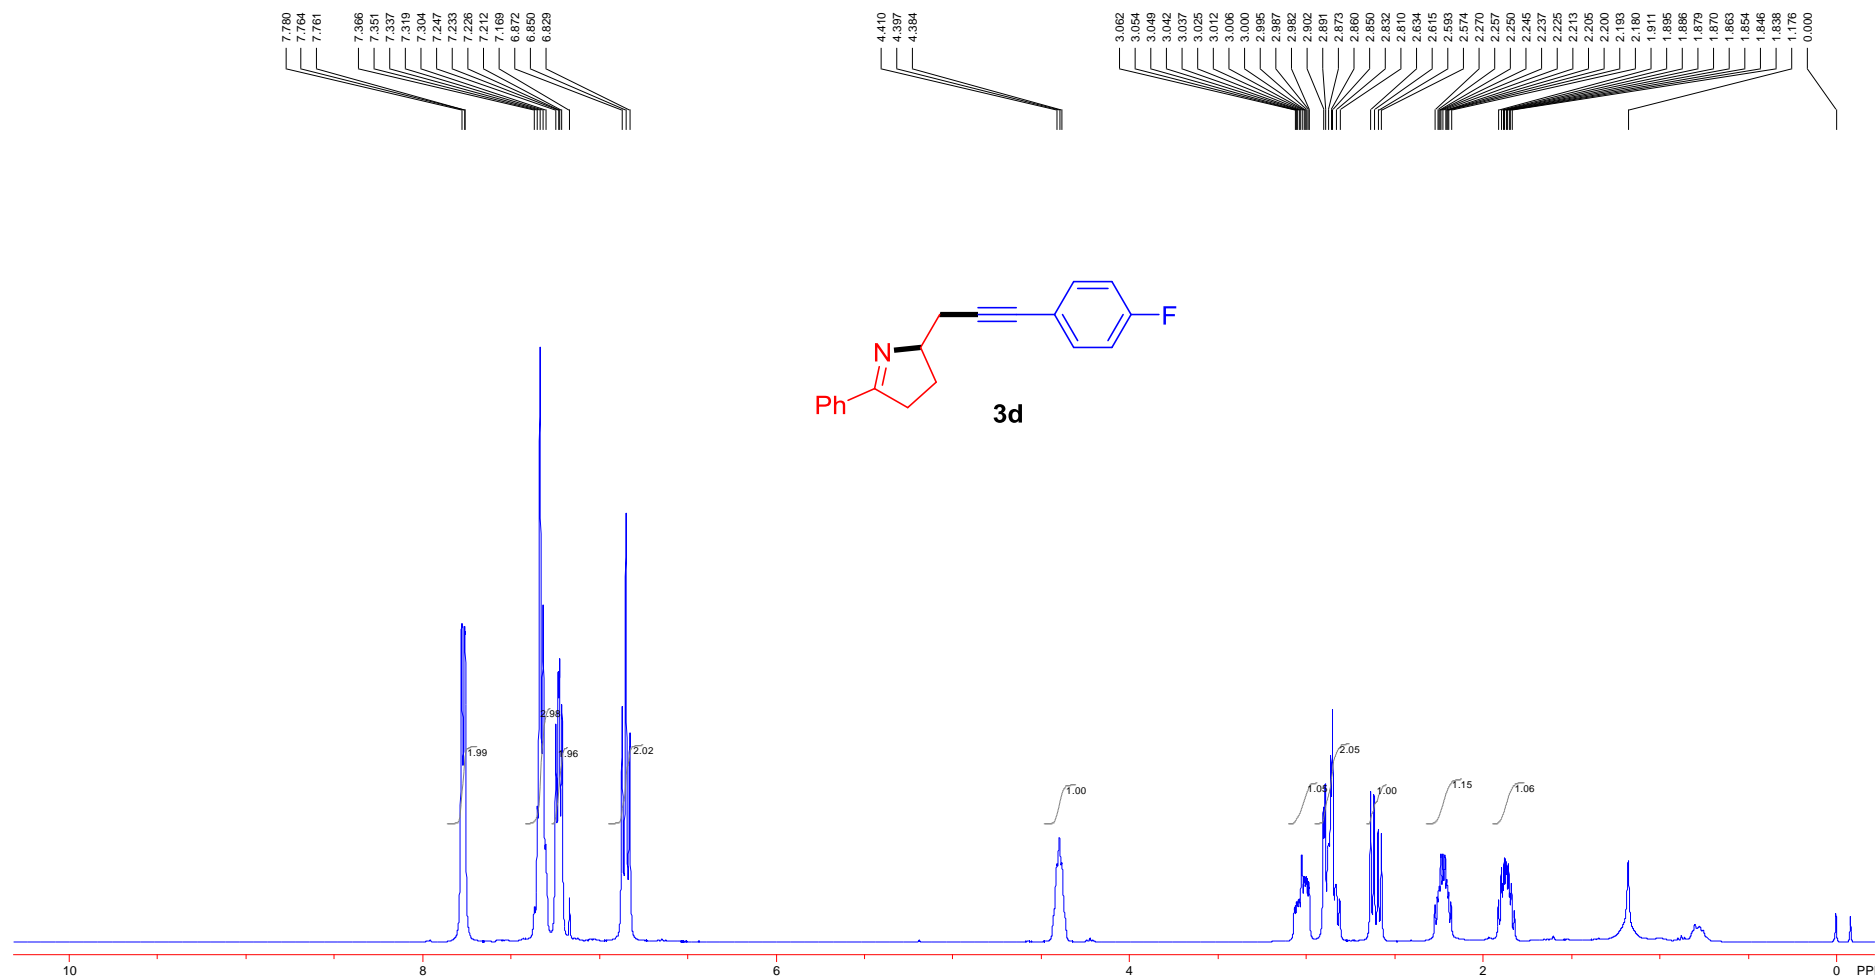



$^{13}\text{C}$  NMR (100 MHz,  $\text{CDCl}_3$ )

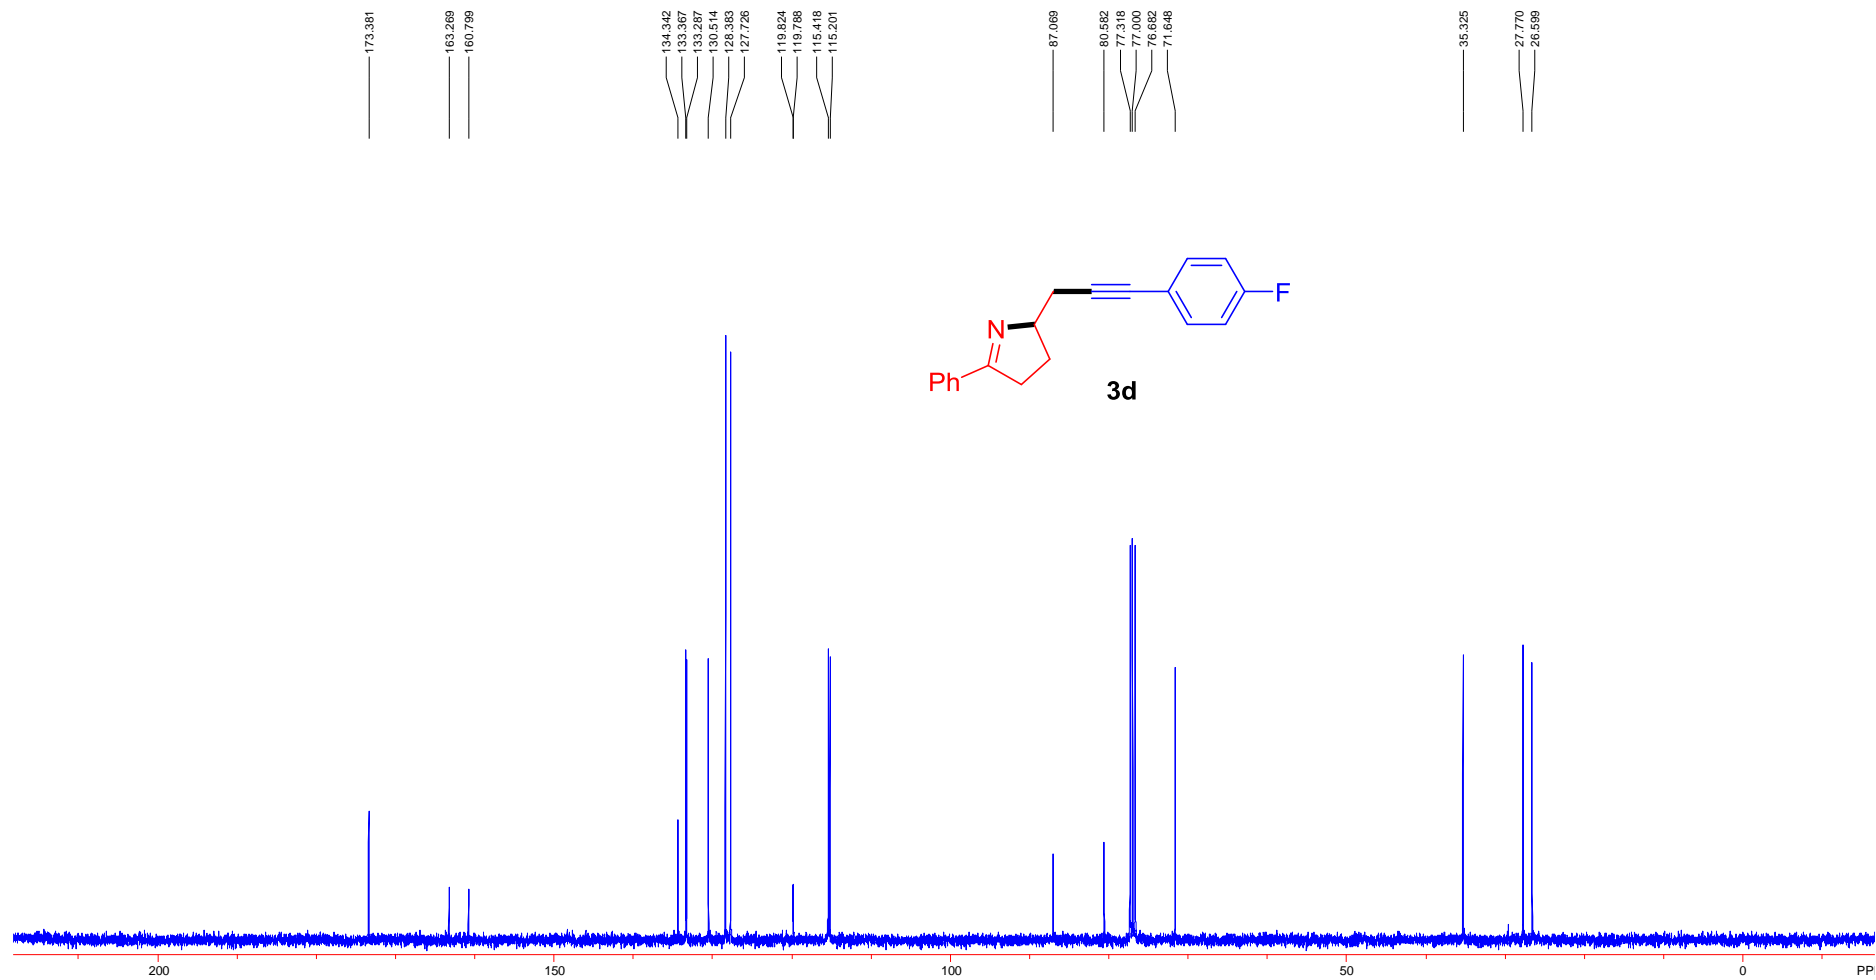

$^1\text{H NMR}$ (400 MHz,  $\text{CDCl}_3$ )

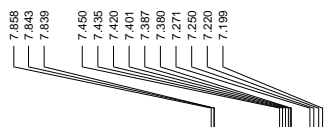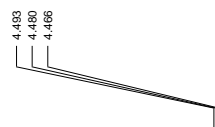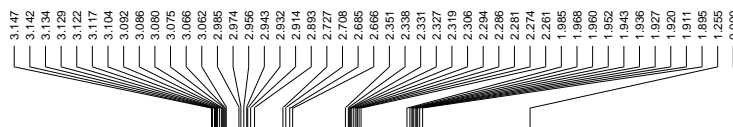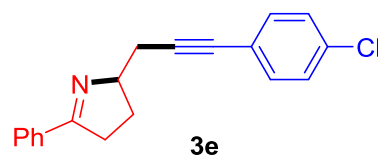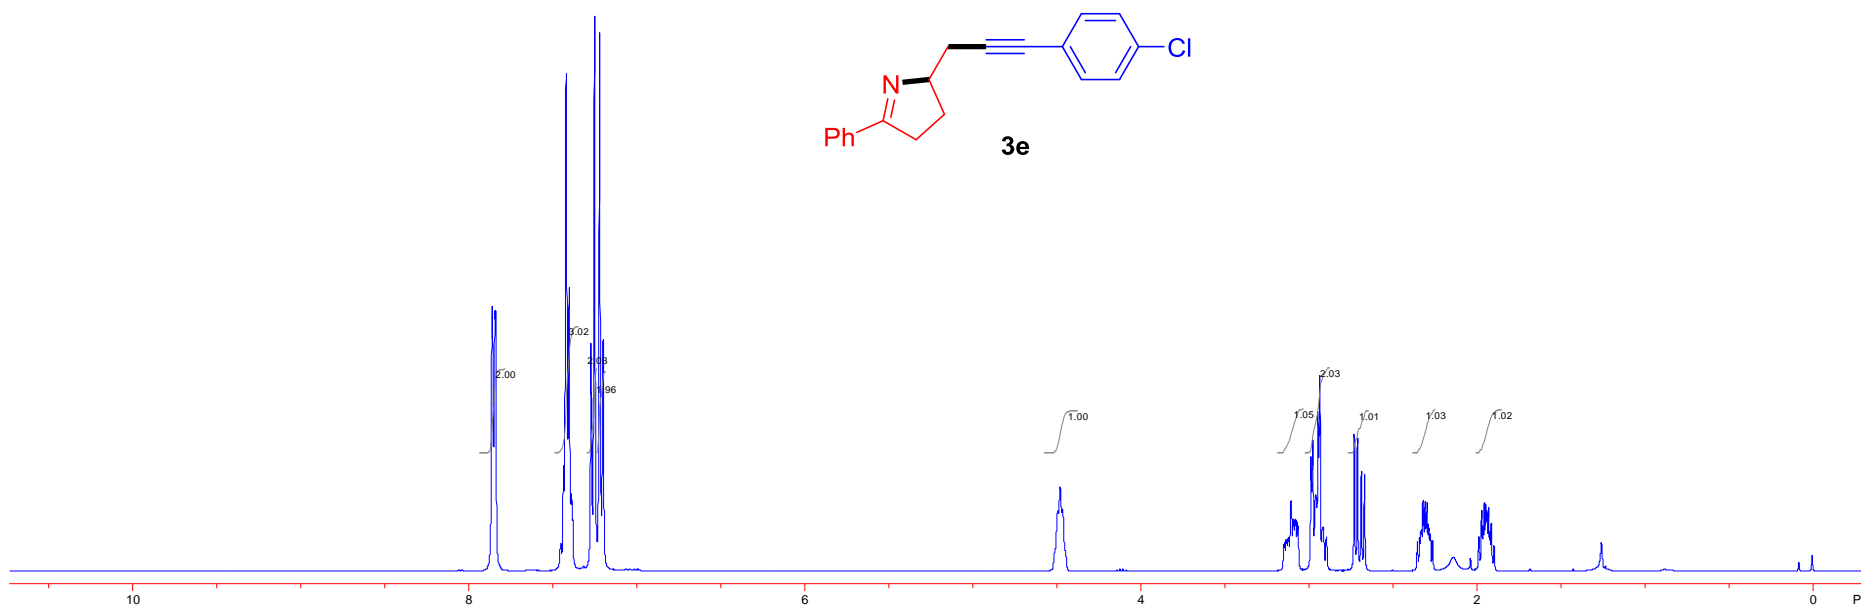

$^{13}\text{C}$  NMR (100 MHz,  $\text{CDCl}_3$ )

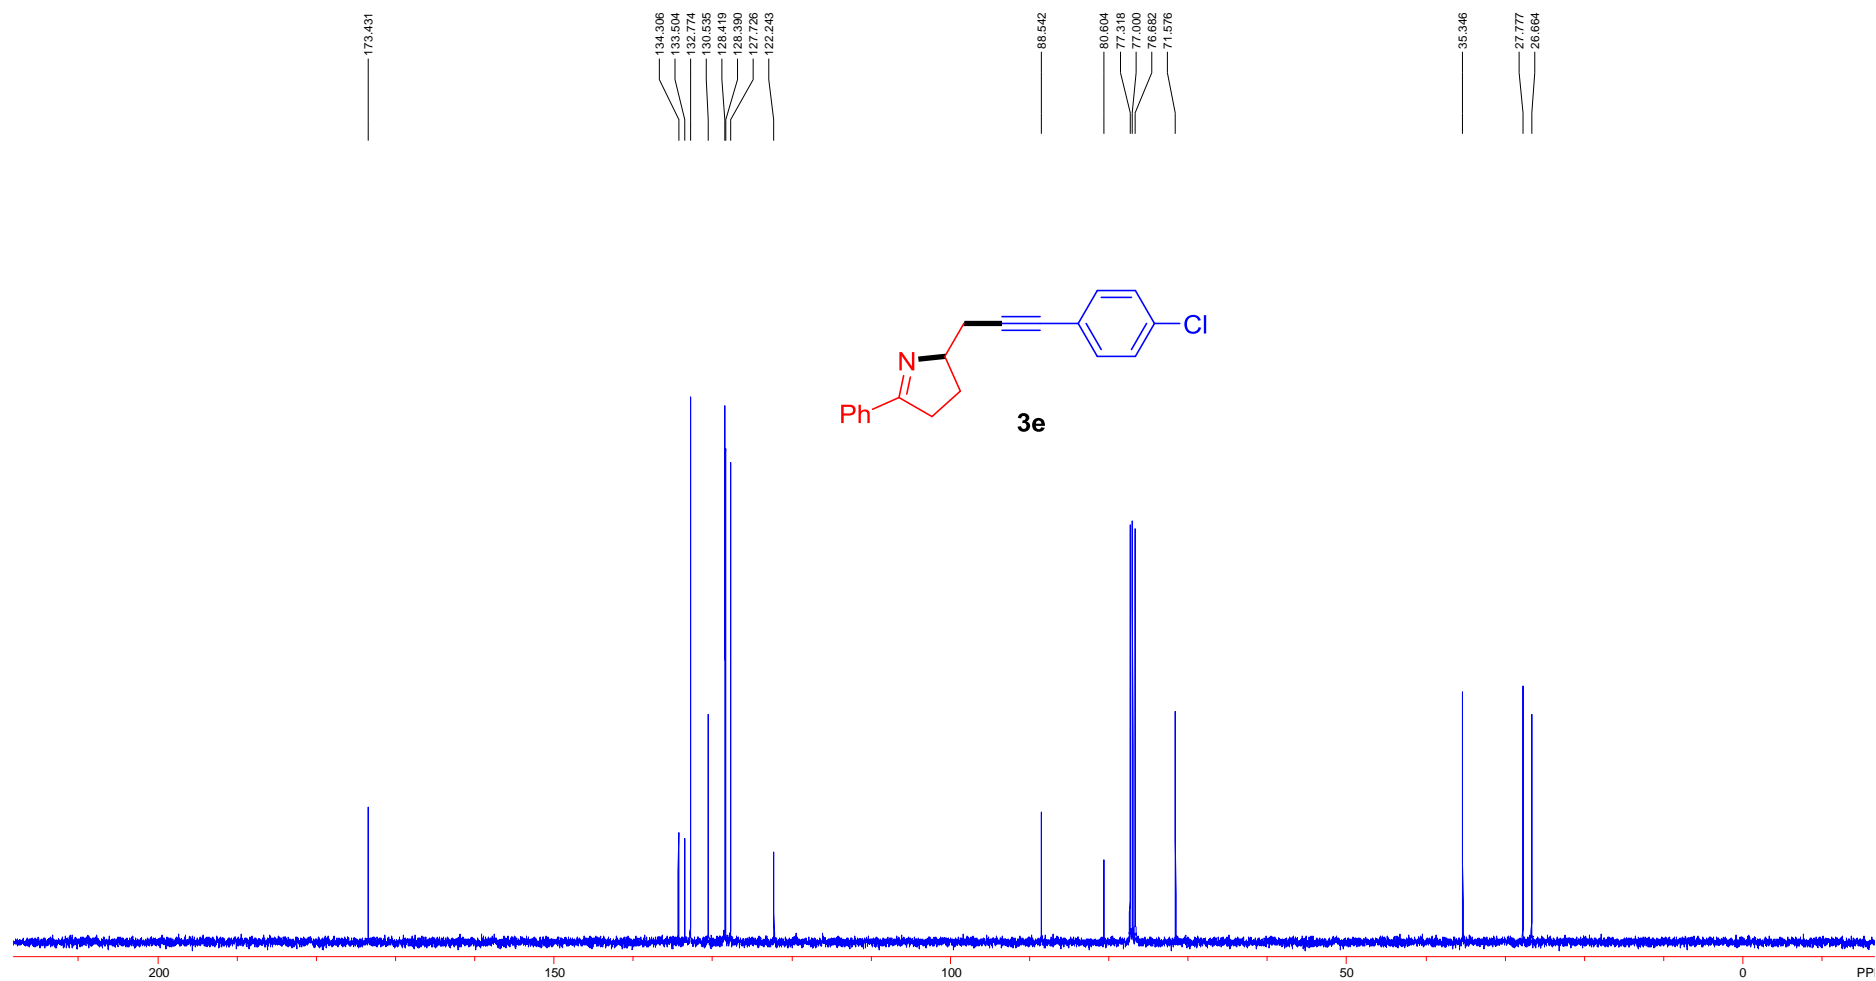

$^1\text{H}$  NMR(400 MHz,  $\text{CDCl}_3$ )

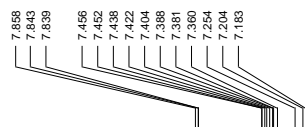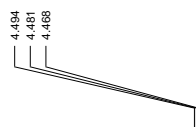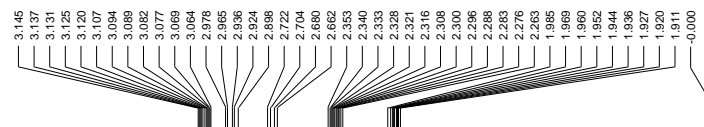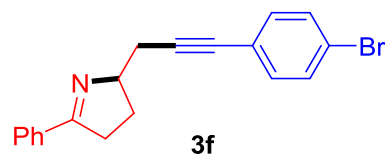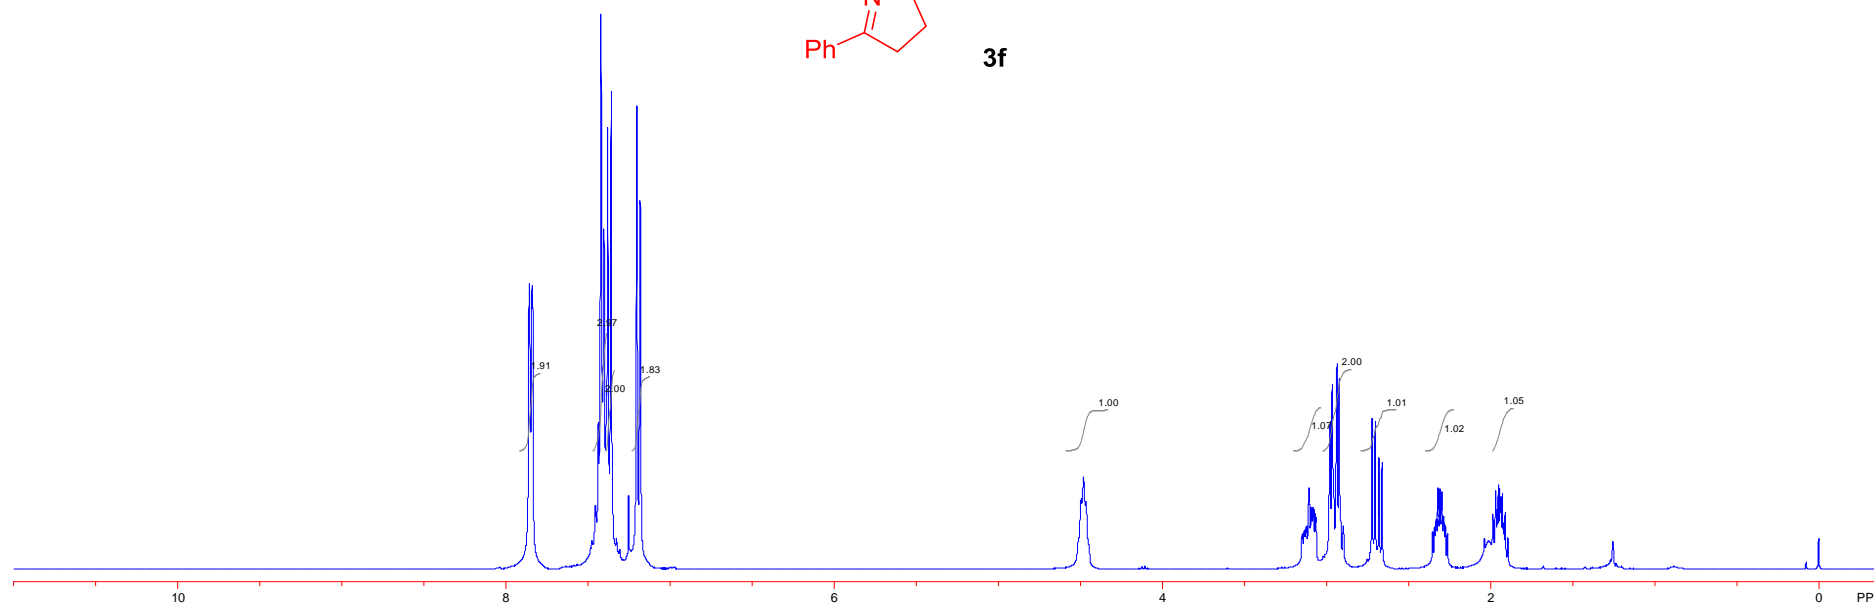

$^{13}\text{C}$  NMR (100 MHz,  $\text{CDCl}_3$ )

173.475

134.298  
133.034  
131.351  
130.564  
128.412  
127.747  
122.720  
121.695

88.766

80.684  
77.318  
77.000  
76.682  
71.554

35.388

27.784  
26.701

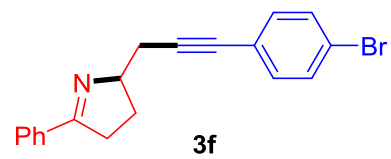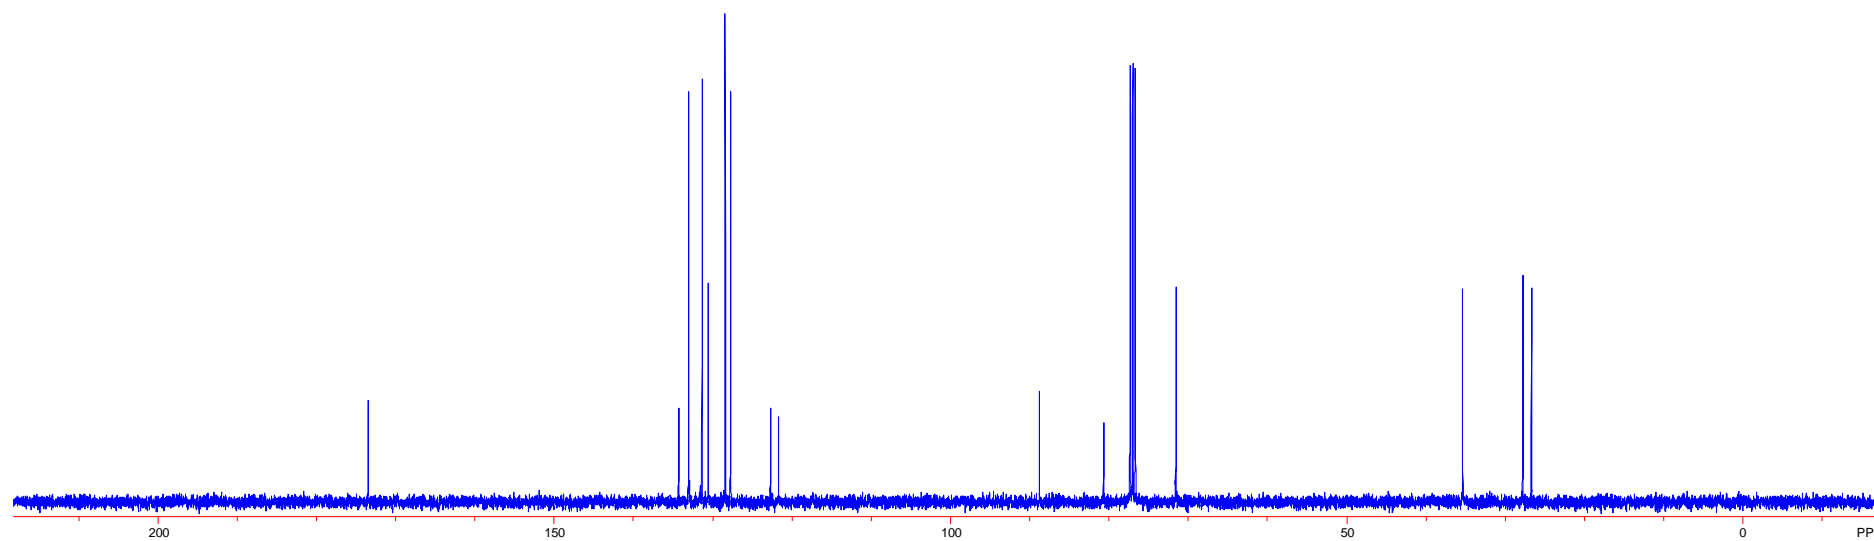

$^1\text{H NMR}$ (400 MHz,  $\text{CDCl}_3$ )

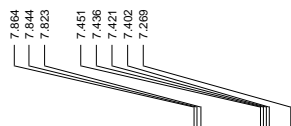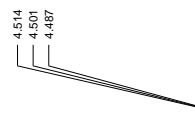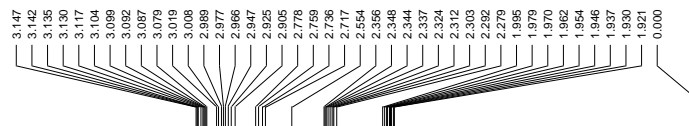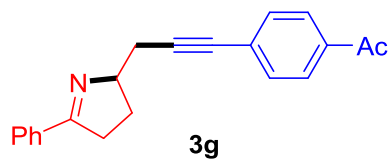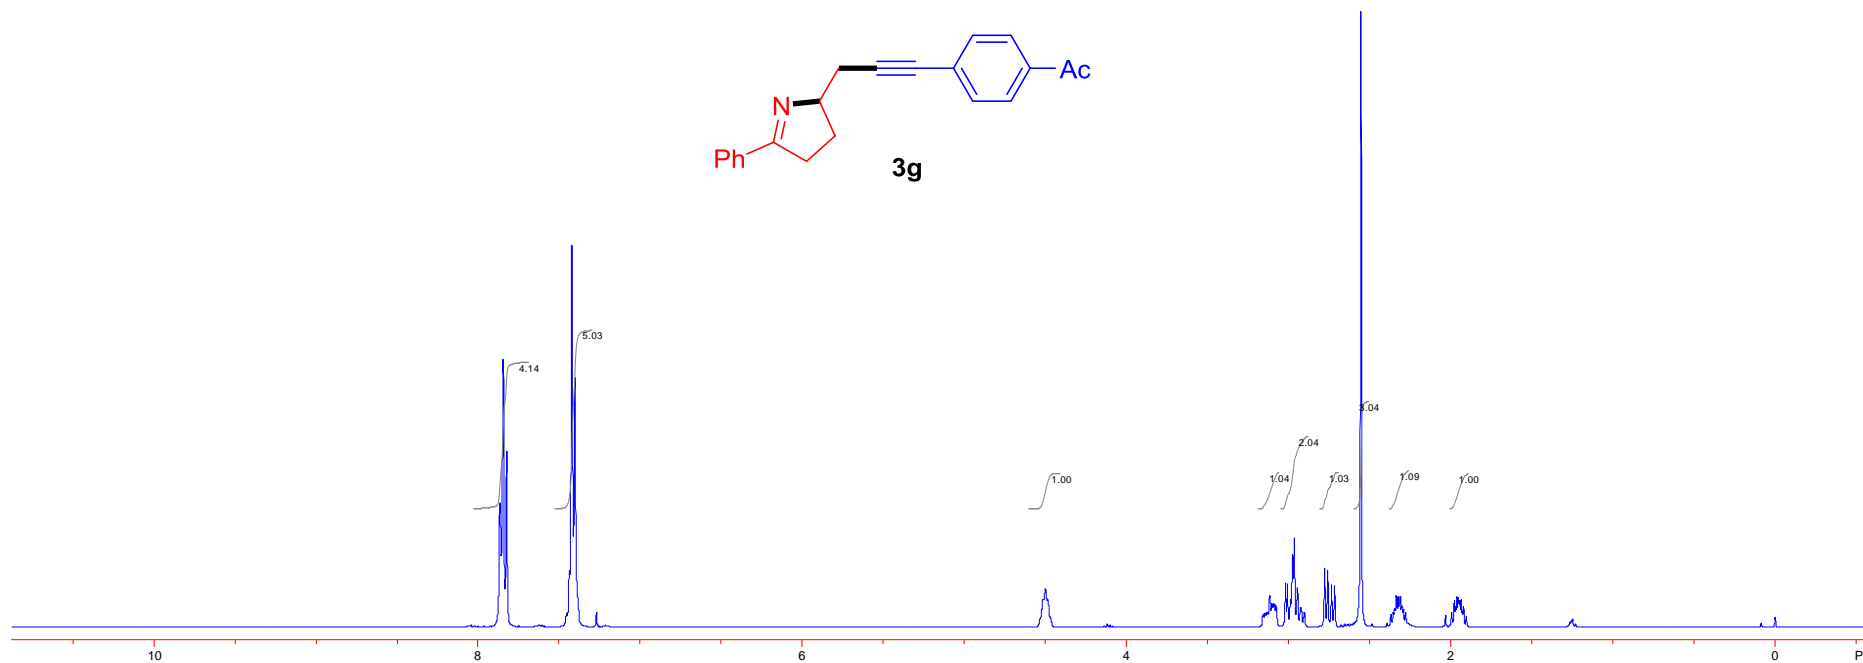

$^{13}\text{C}$  NMR (100 MHz,  $\text{CDCl}_3$ )

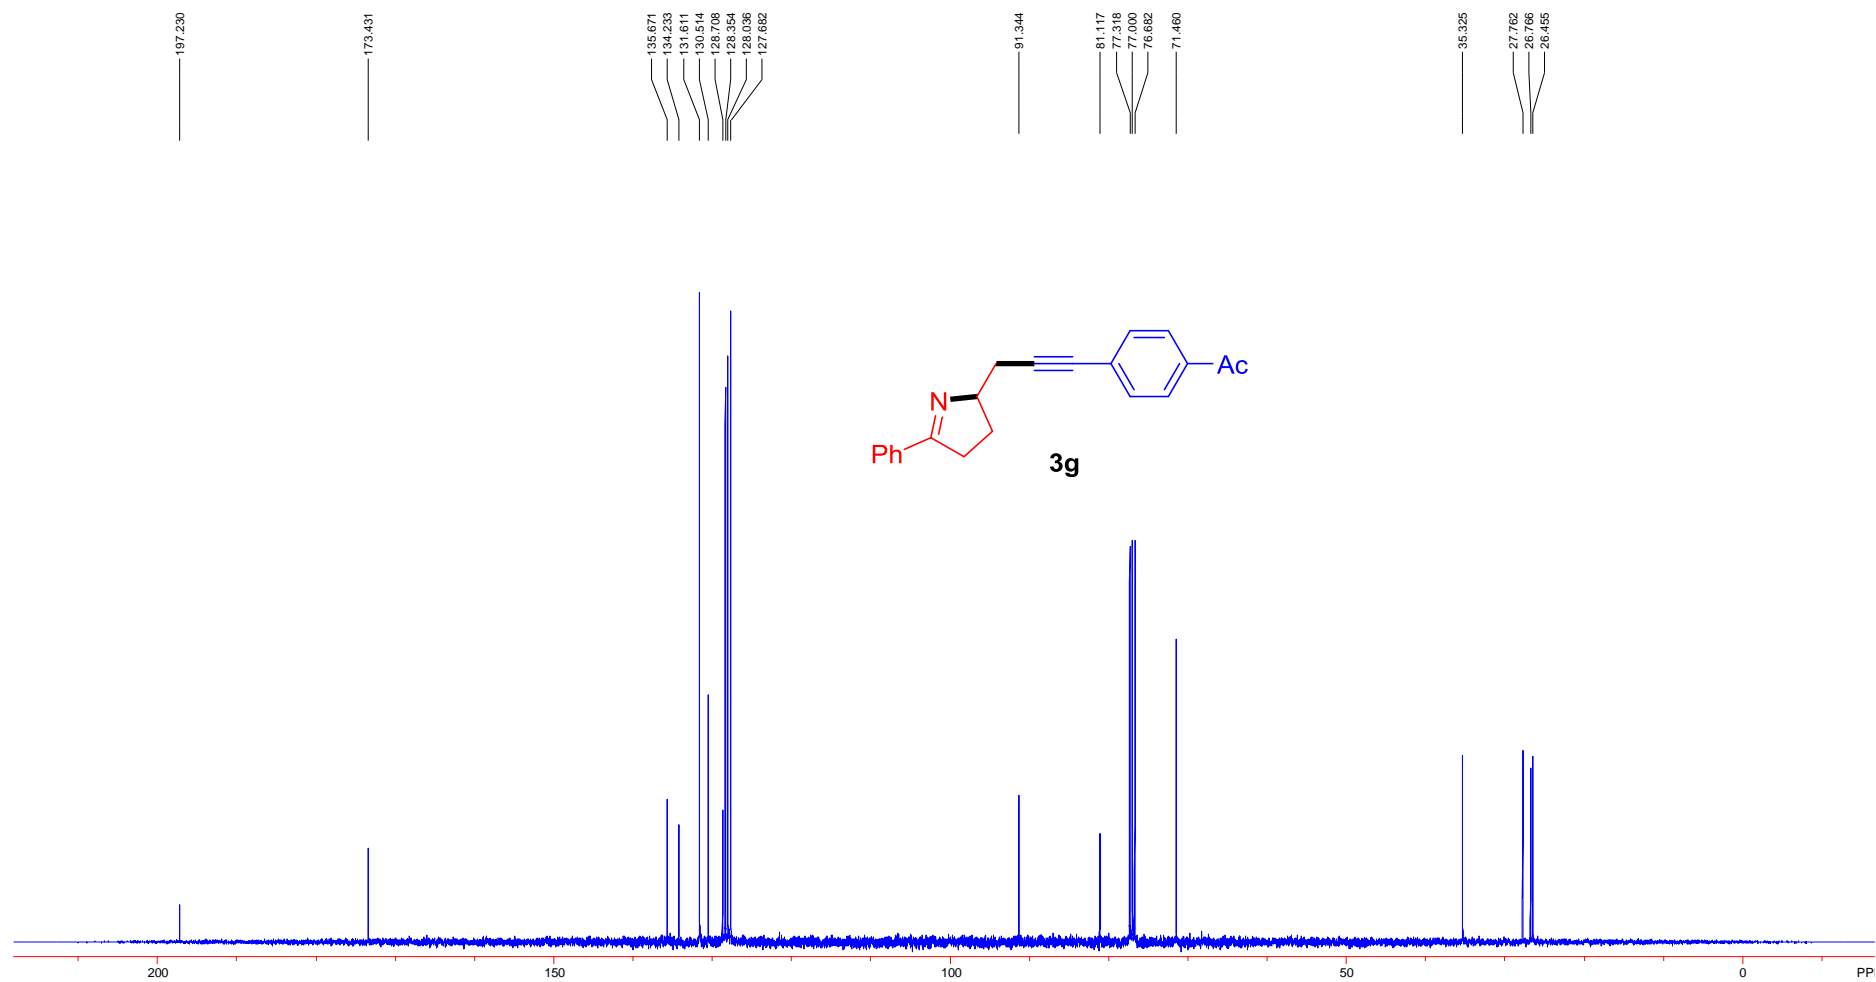

$^1\text{H NMR}$ (400 MHz,  $\text{CDCl}_3$ )

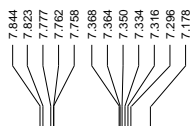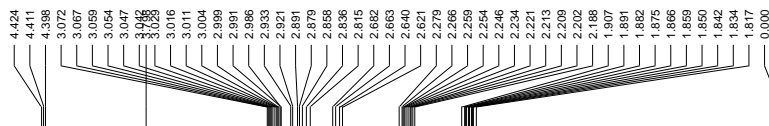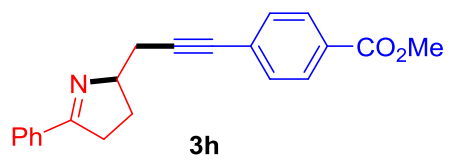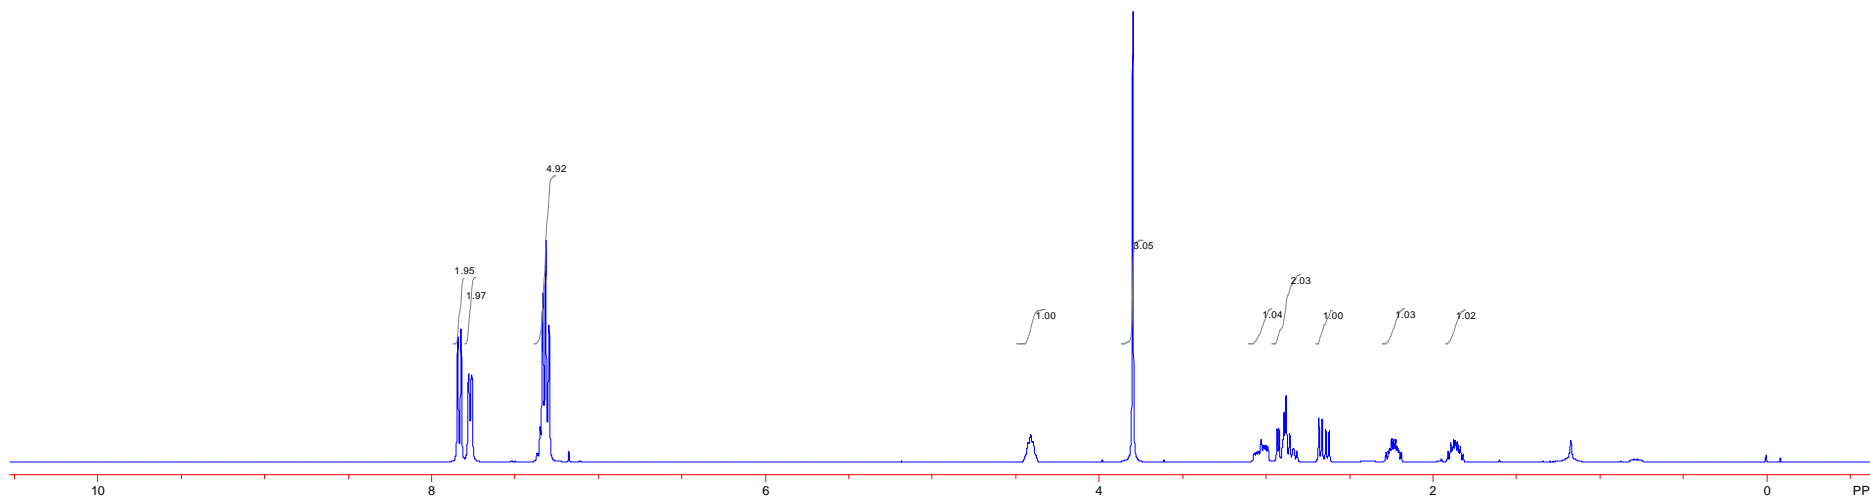



$^{13}\text{C}$  NMR (100 MHz,  $\text{CDCl}_3$ )

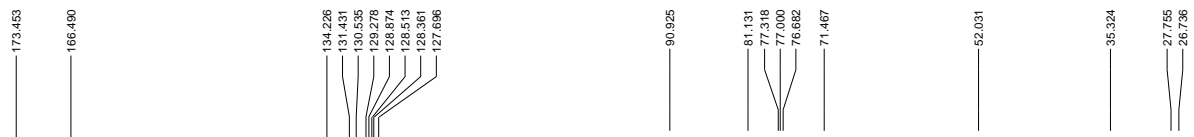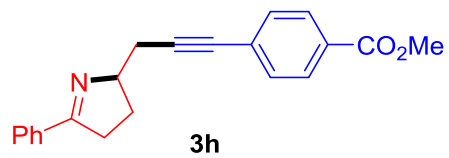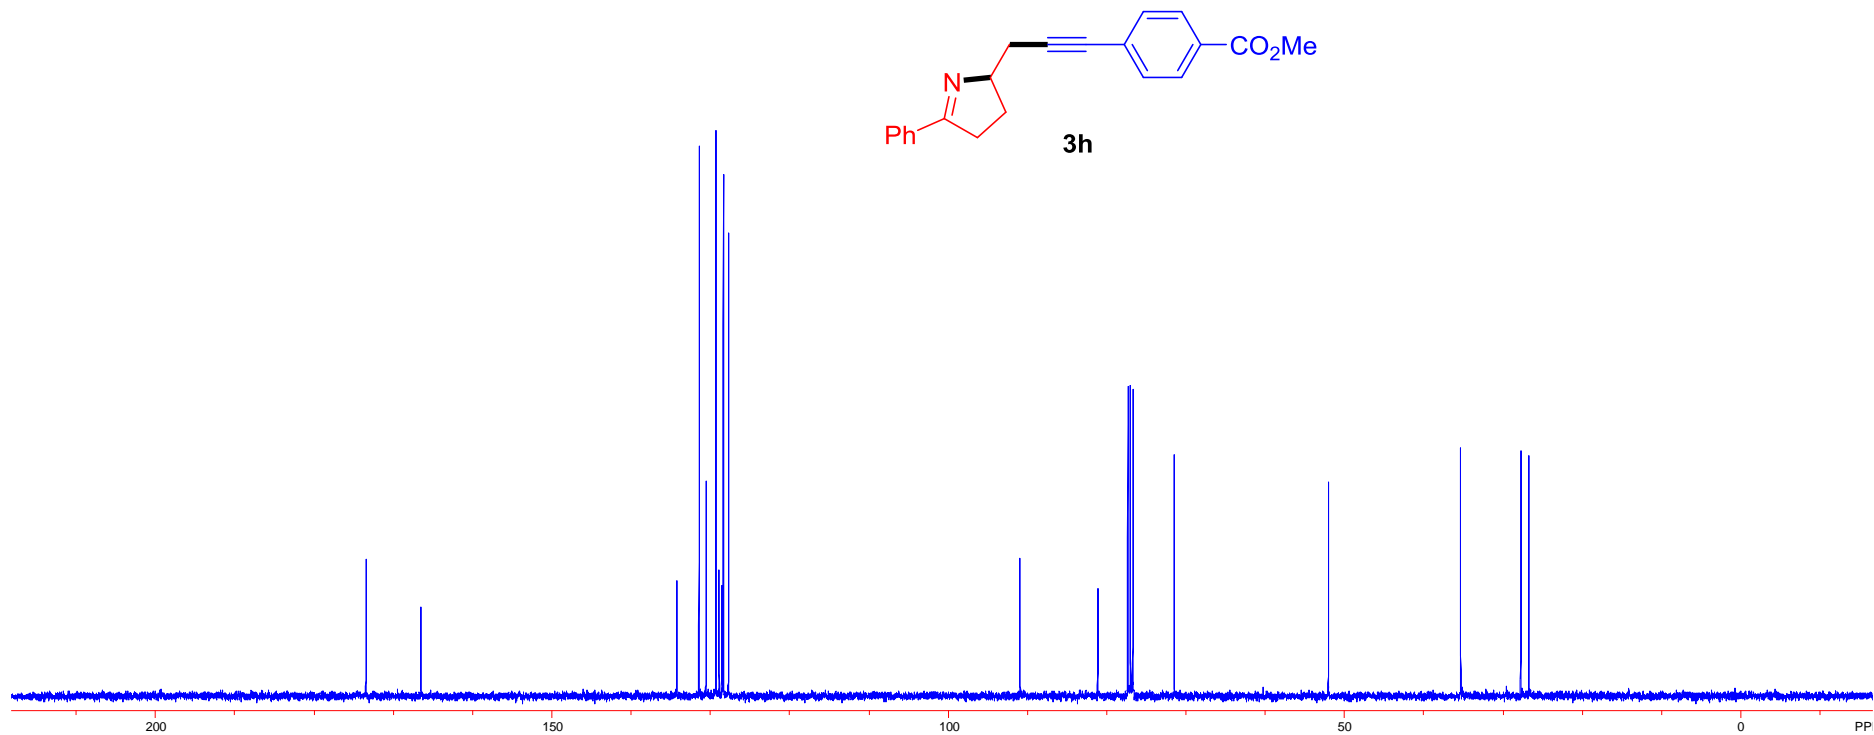

$^1\text{H}$  NMR(600 MHz,  $\text{CDCl}_3$ )

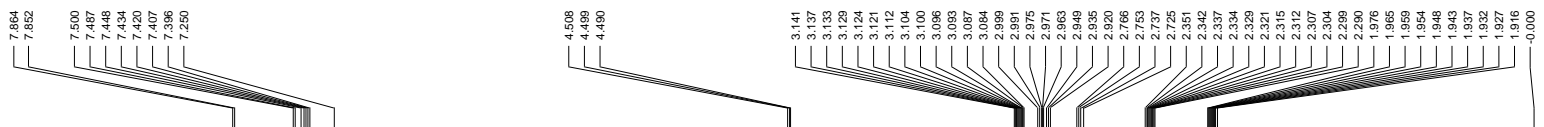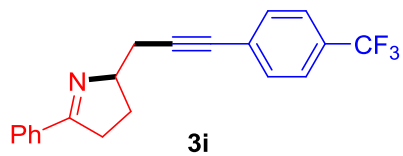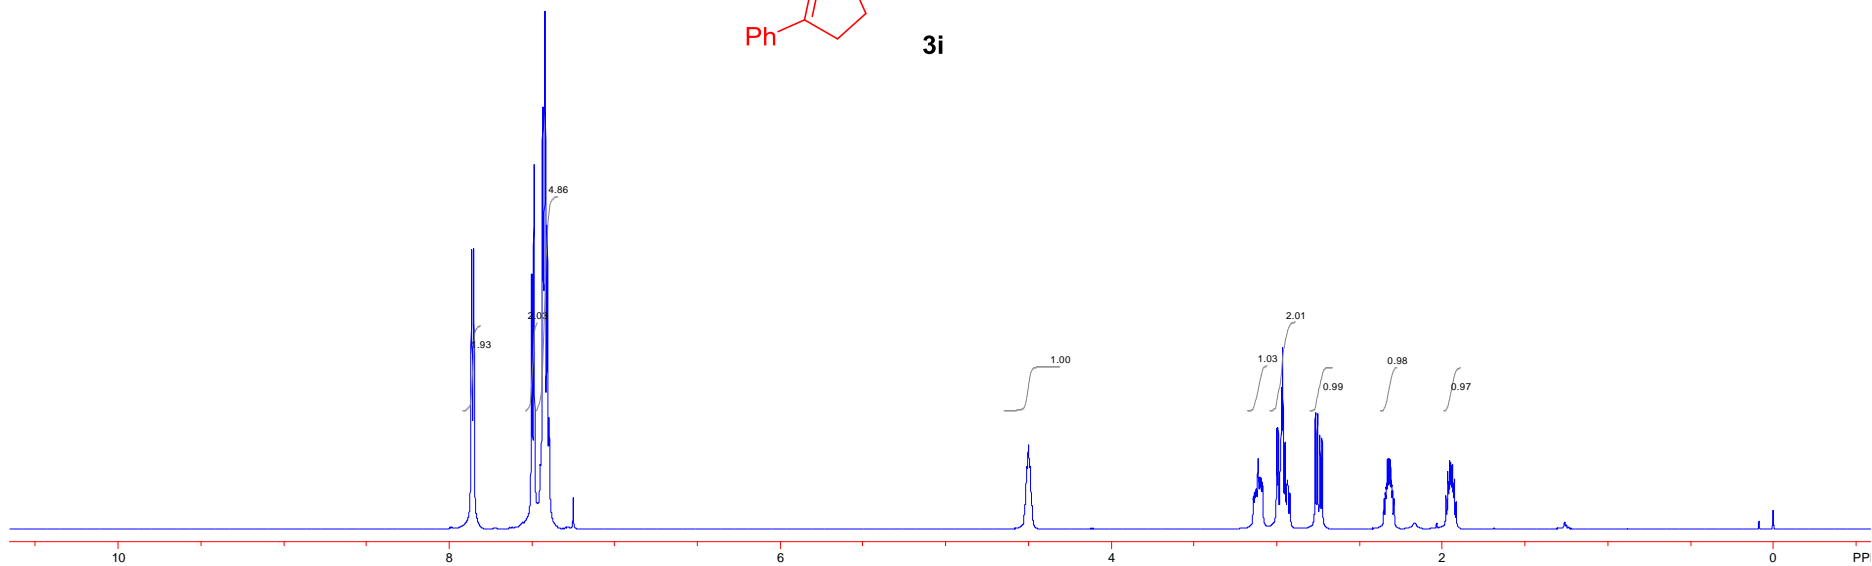

$^{13}\text{C}$  NMR (151 MHz,  $\text{CDCl}_3$ )

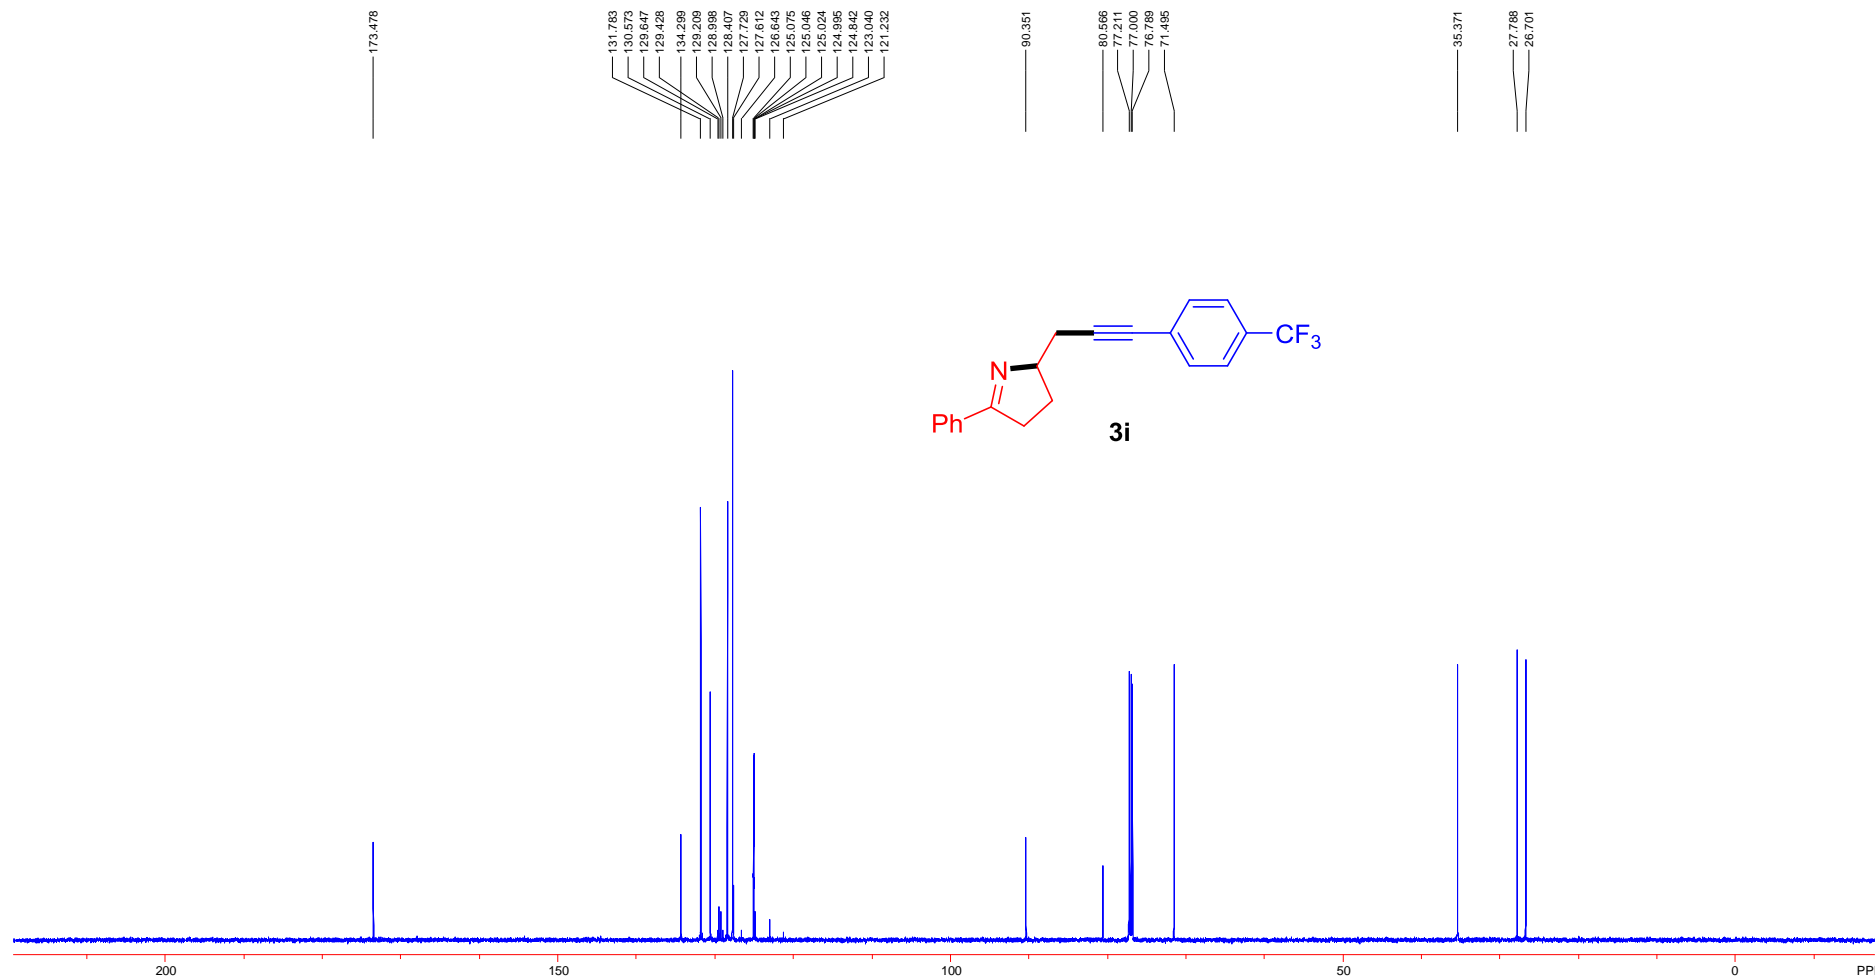

$^1\text{H}$  NMR(400 MHz,  $\text{CDCl}_3$ )

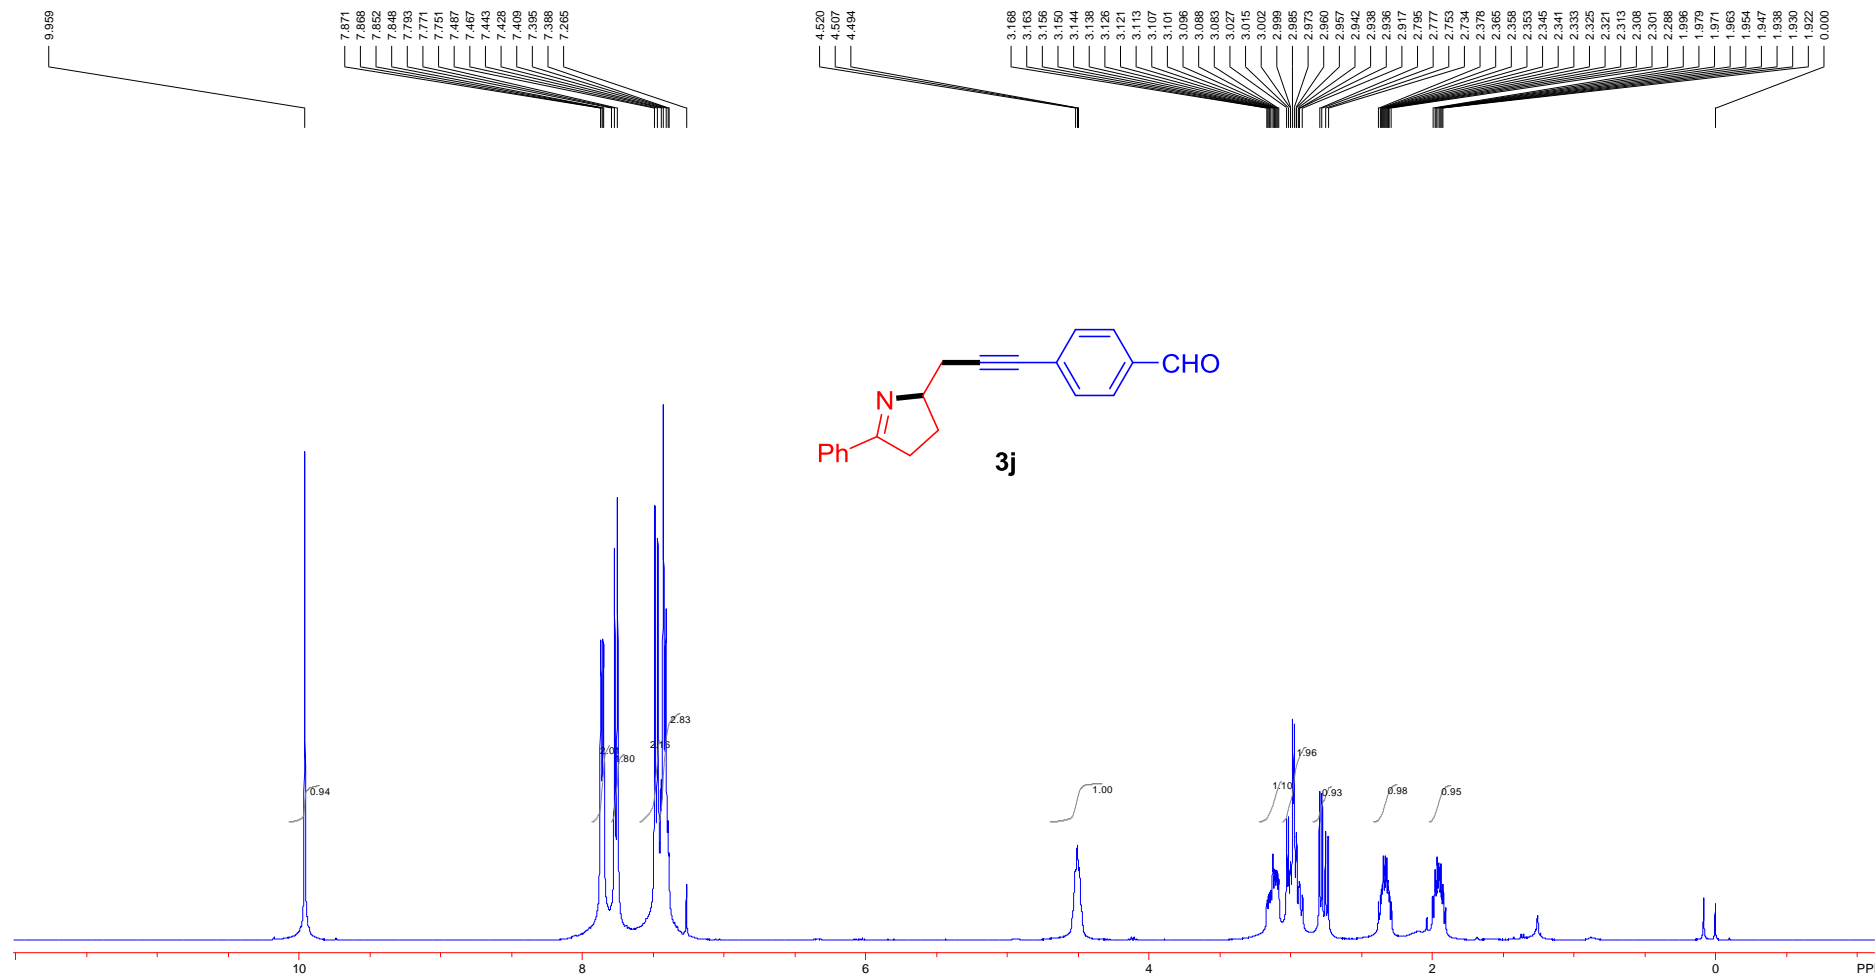

$^{13}\text{C}$  NMR (100 MHz,  $\text{CDCl}_3$ )

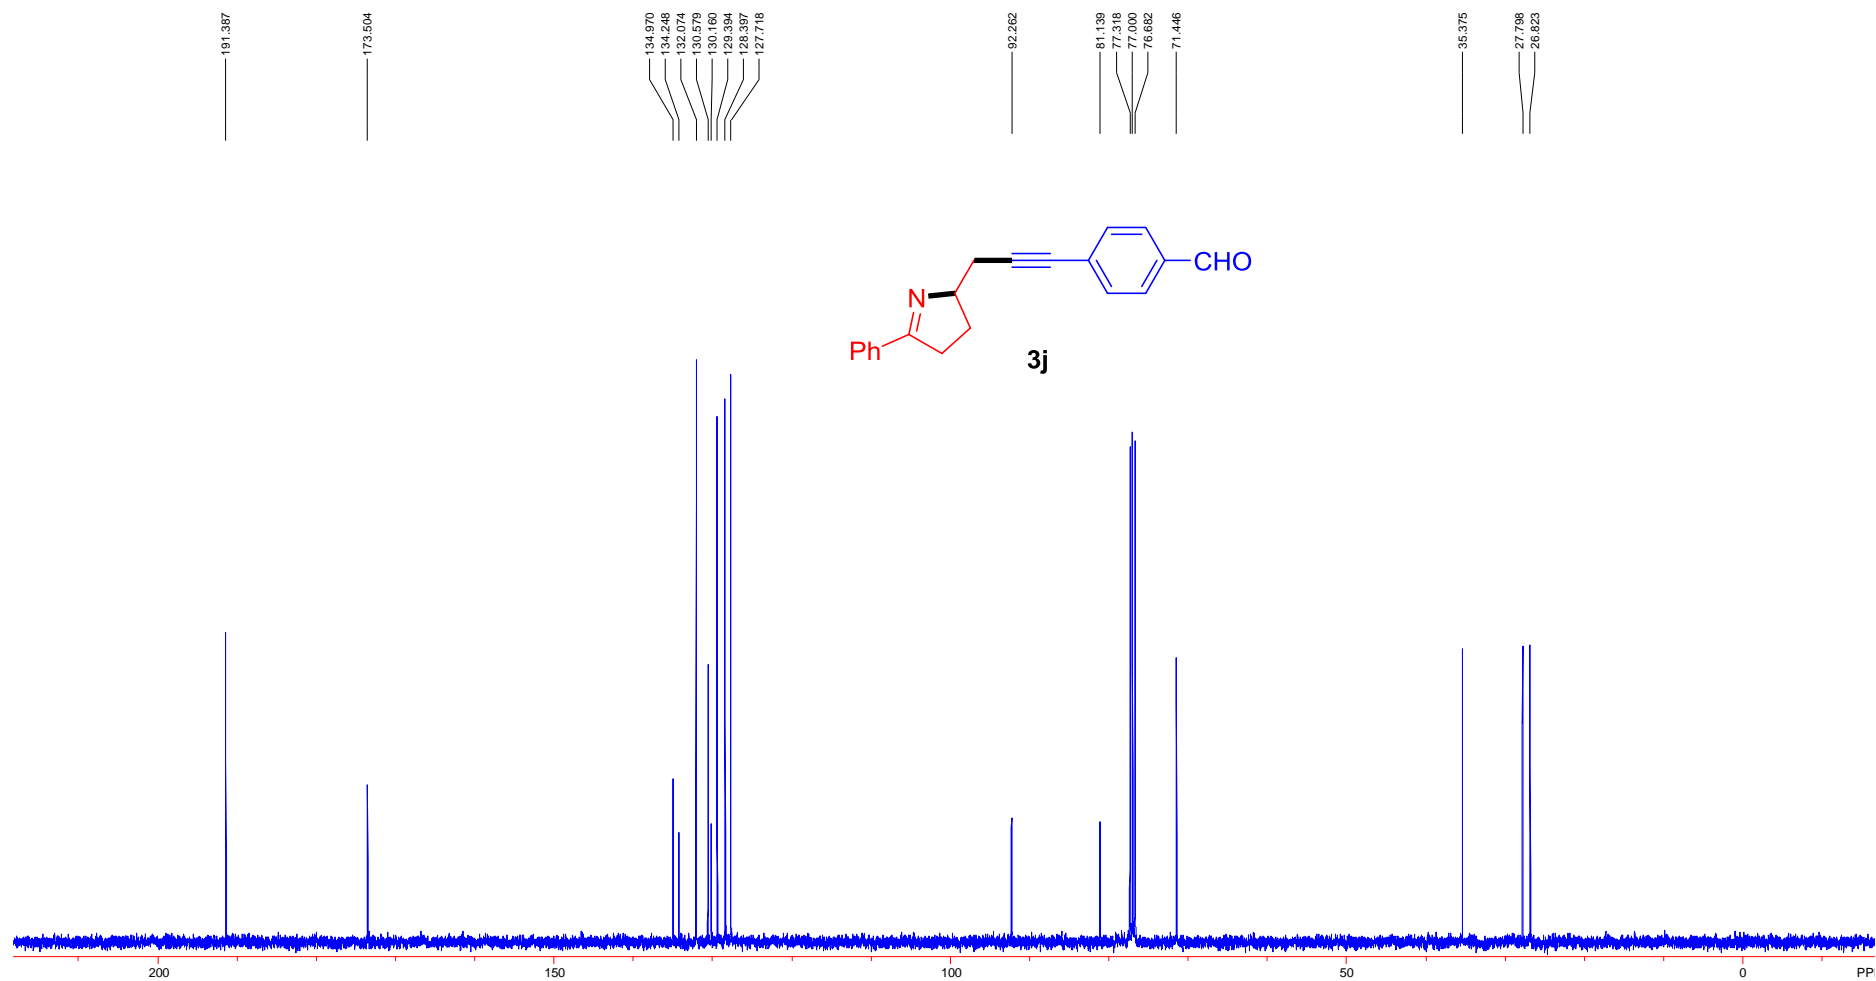

$^1\text{H}$  NMR(400 MHz,  $\text{CDCl}_3$ )

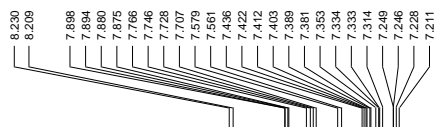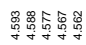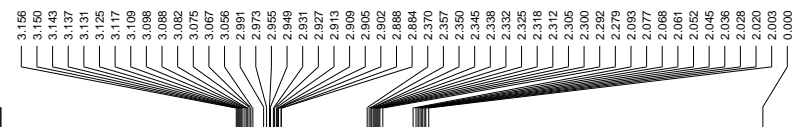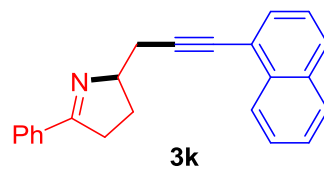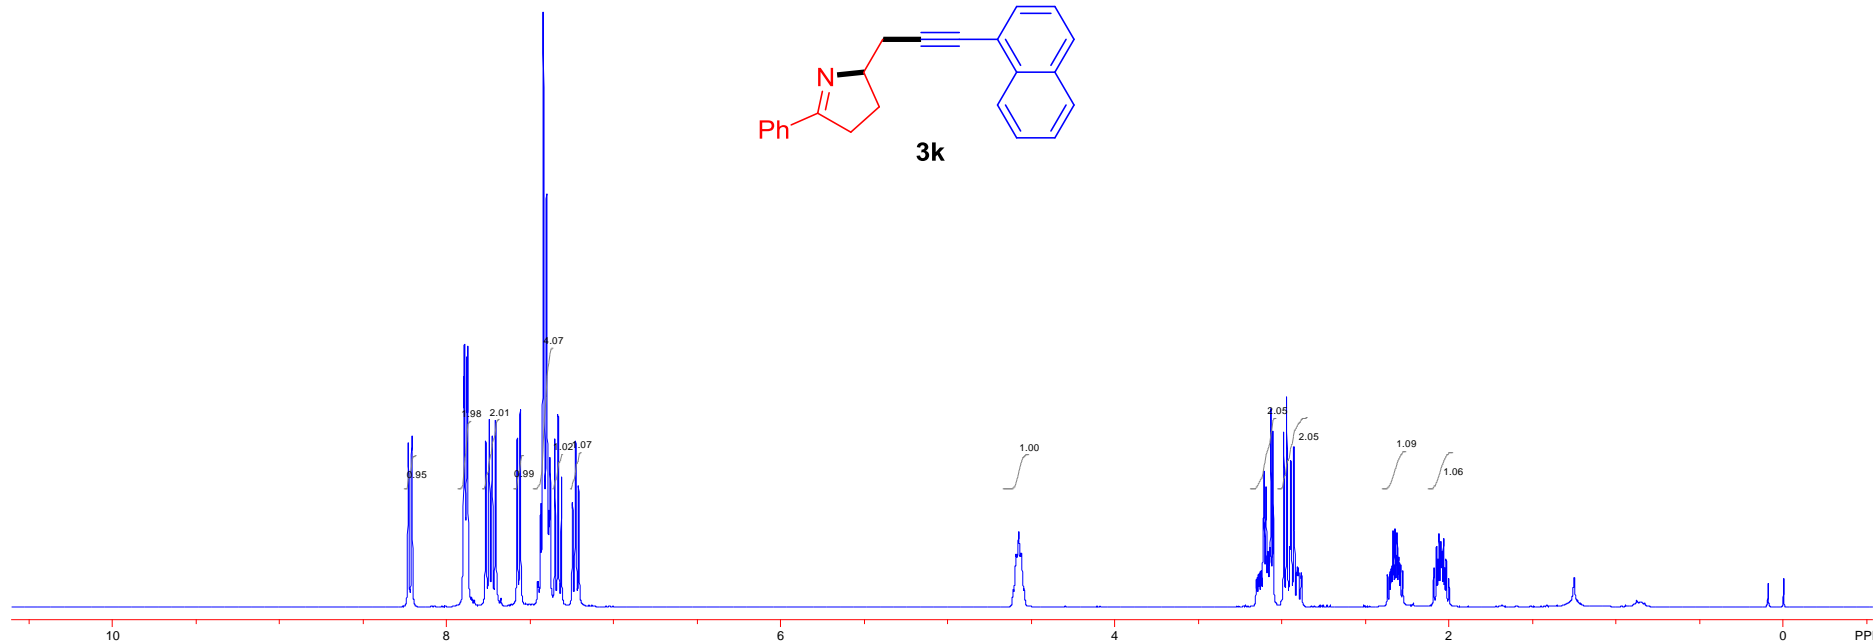

$^{13}\text{C}$  NMR (100 MHz,  $\text{CDCl}_3$ )

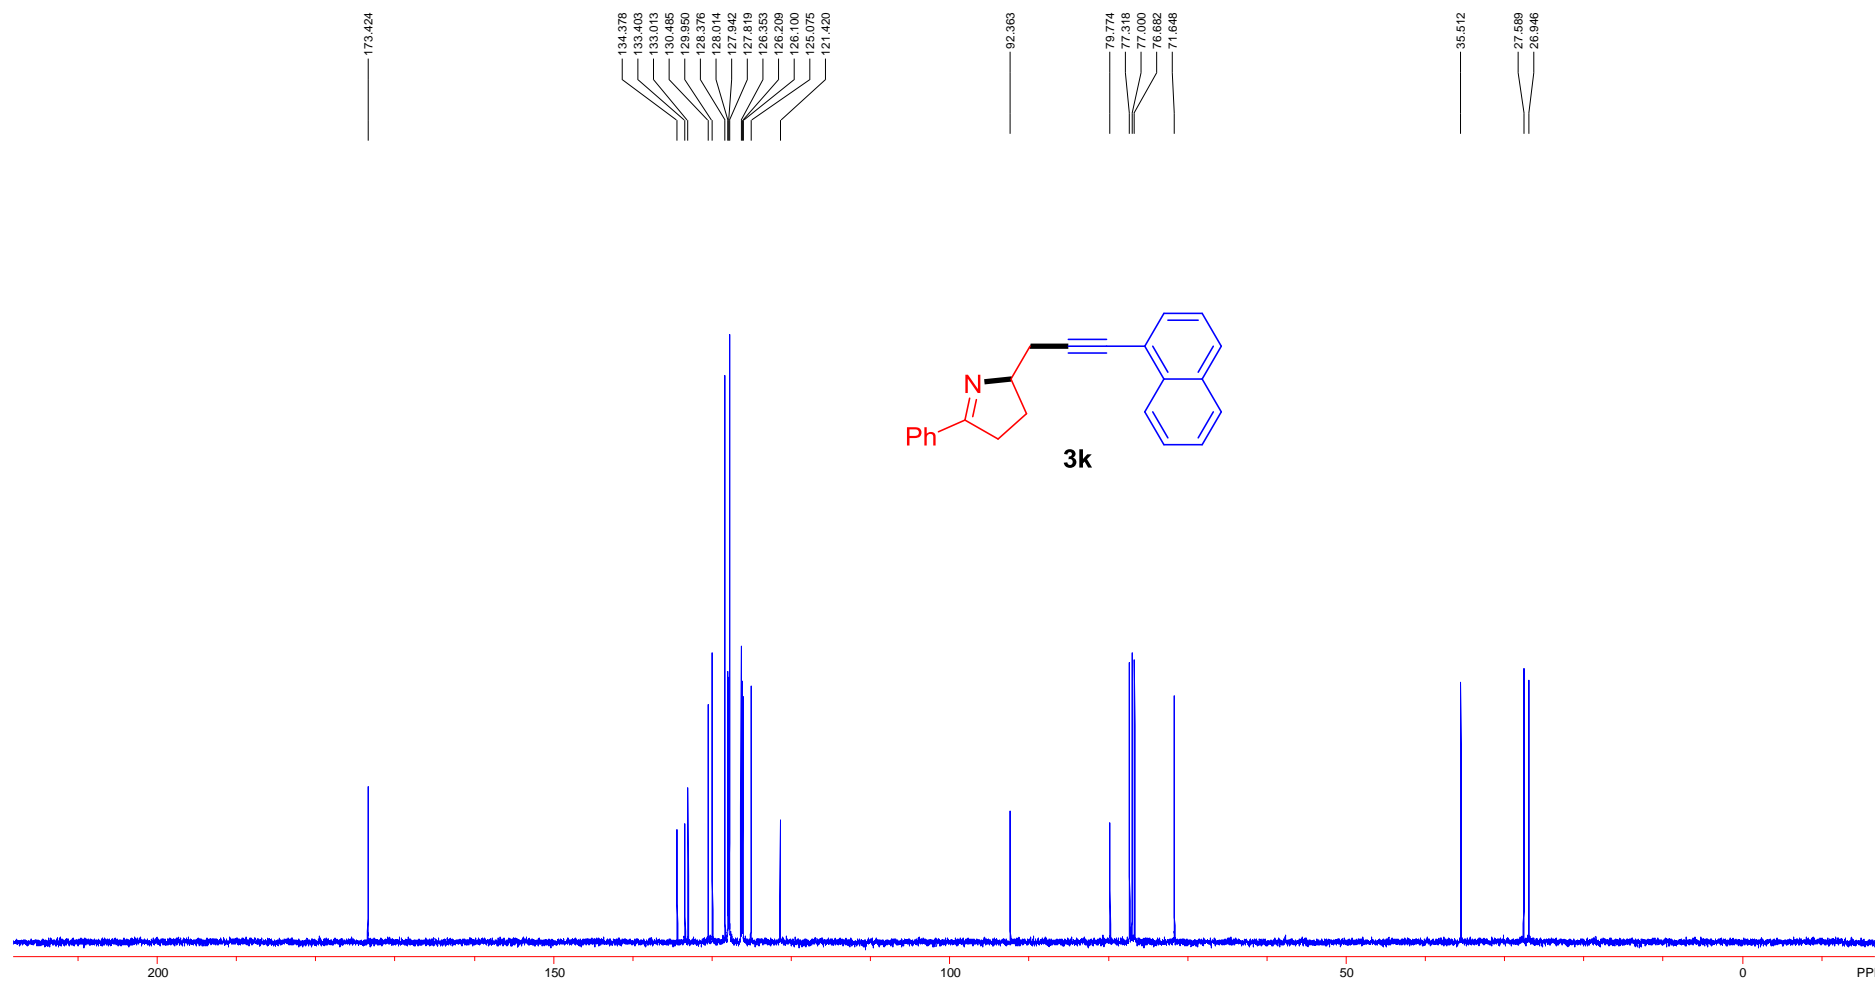

$^1\text{H}$  NMR(400 MHz,  $\text{CDCl}_3$ )

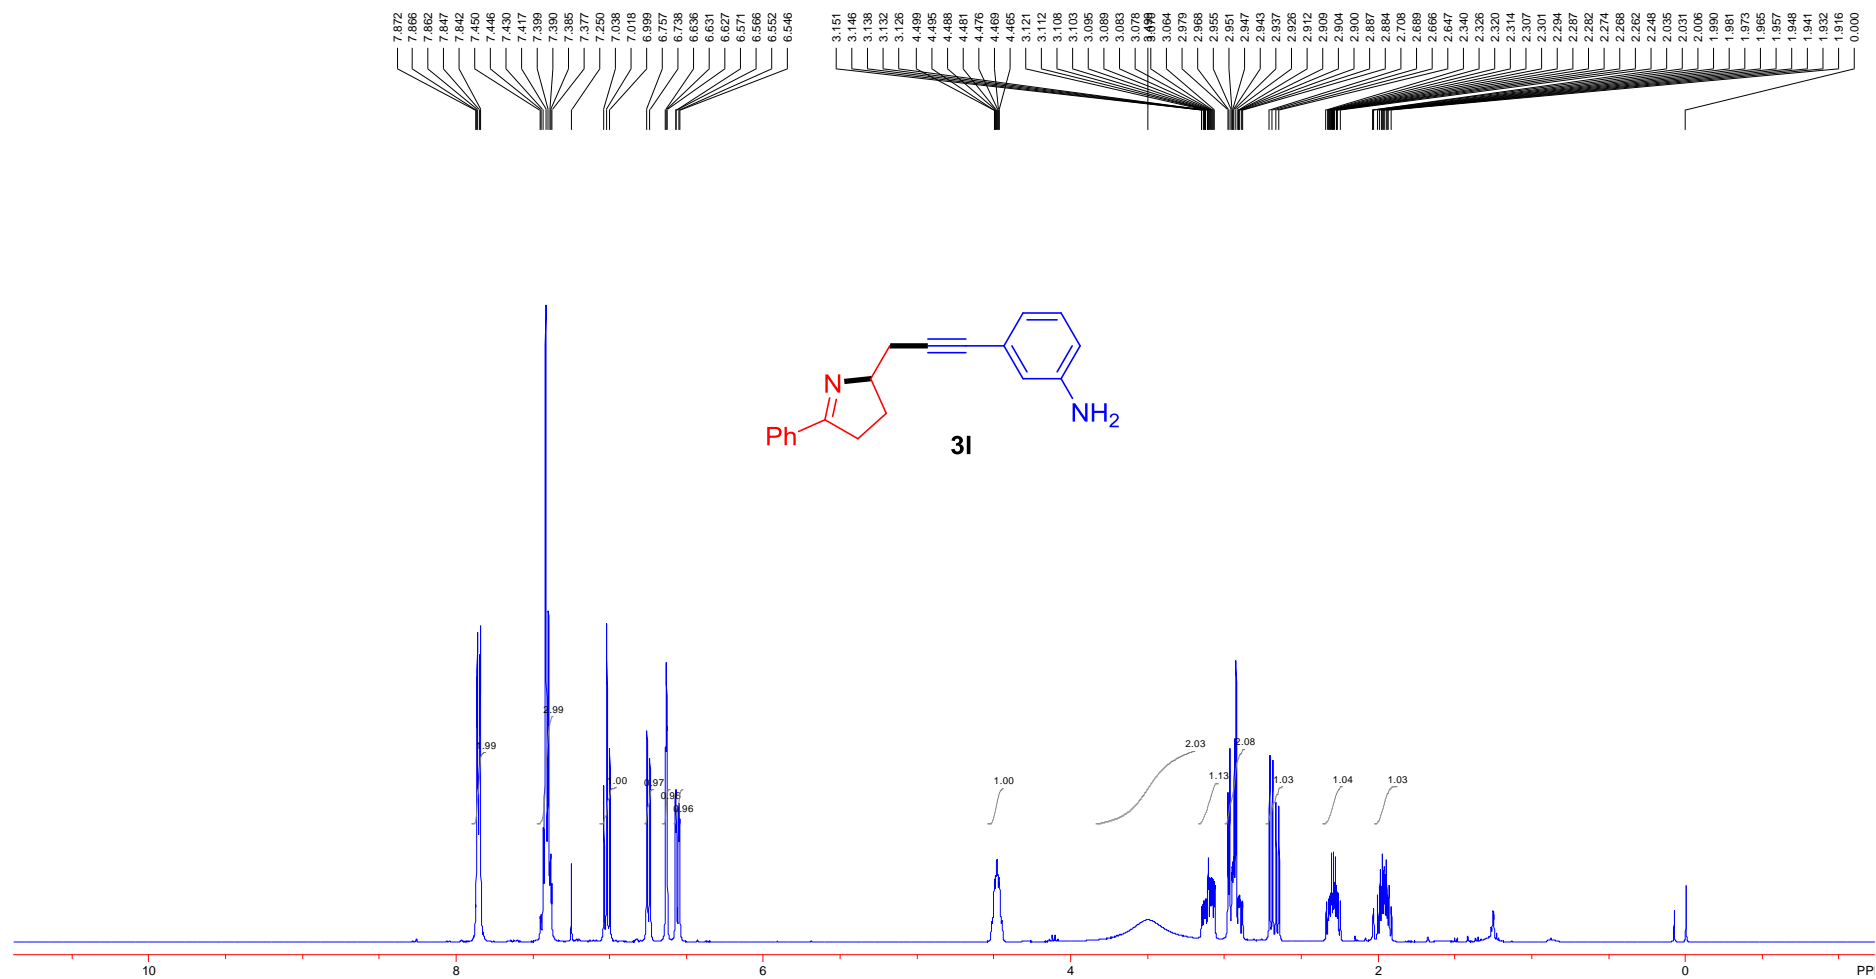



$^{13}\text{C}$  NMR (100 MHz,  $\text{CDCl}_3$ )

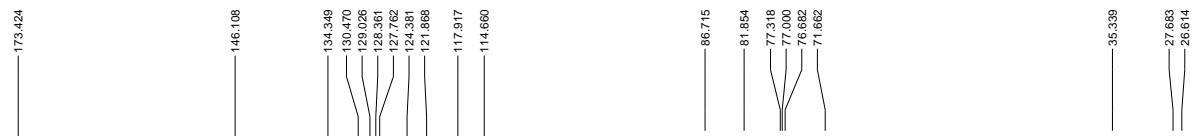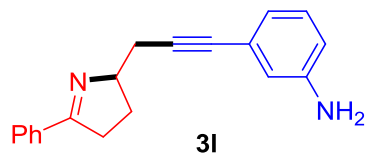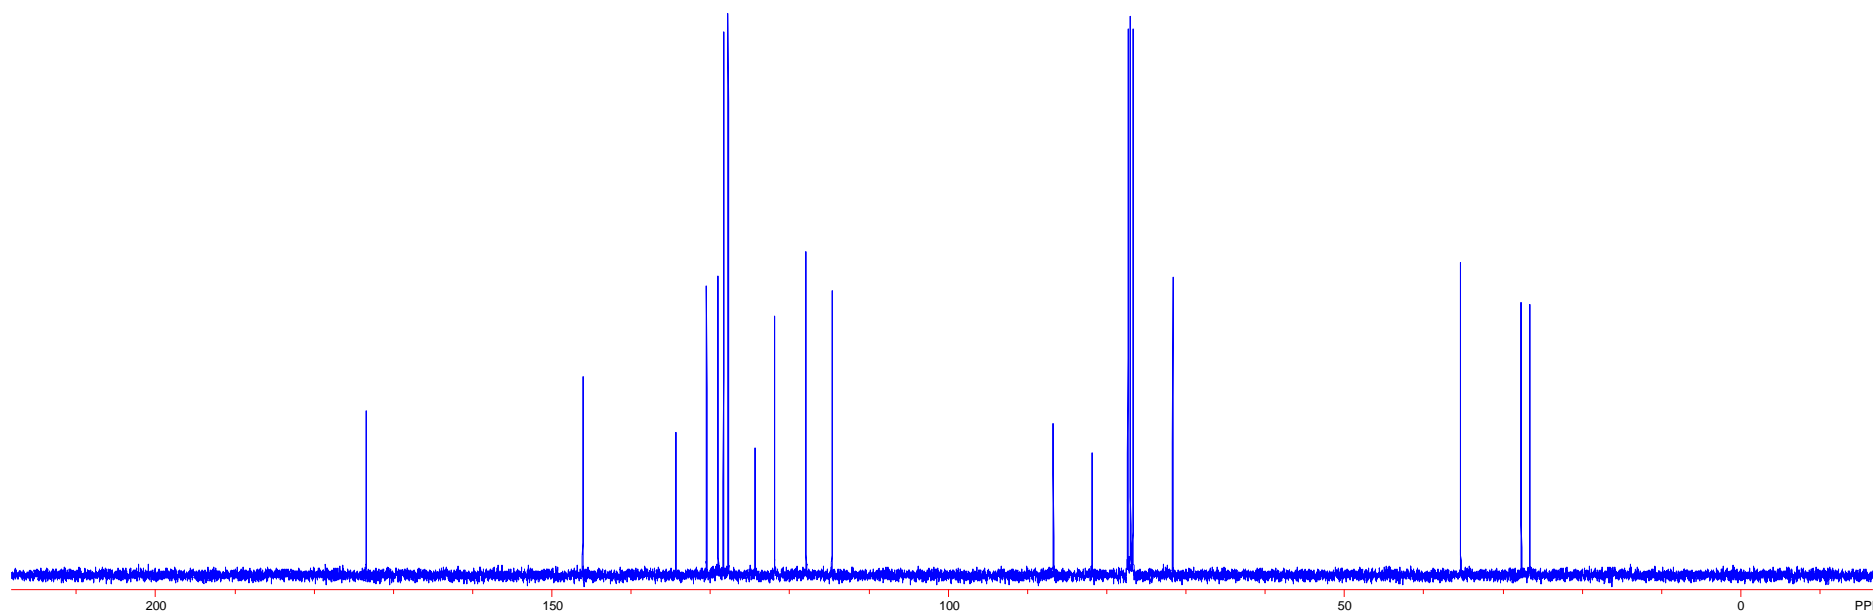

$^1\text{H}$  NMR(400 MHz,  $\text{CDCl}_3$ )

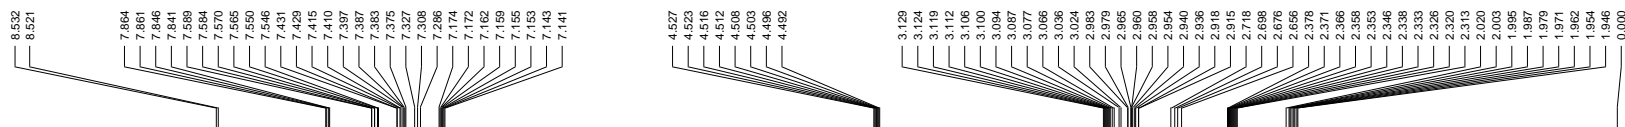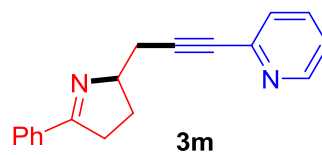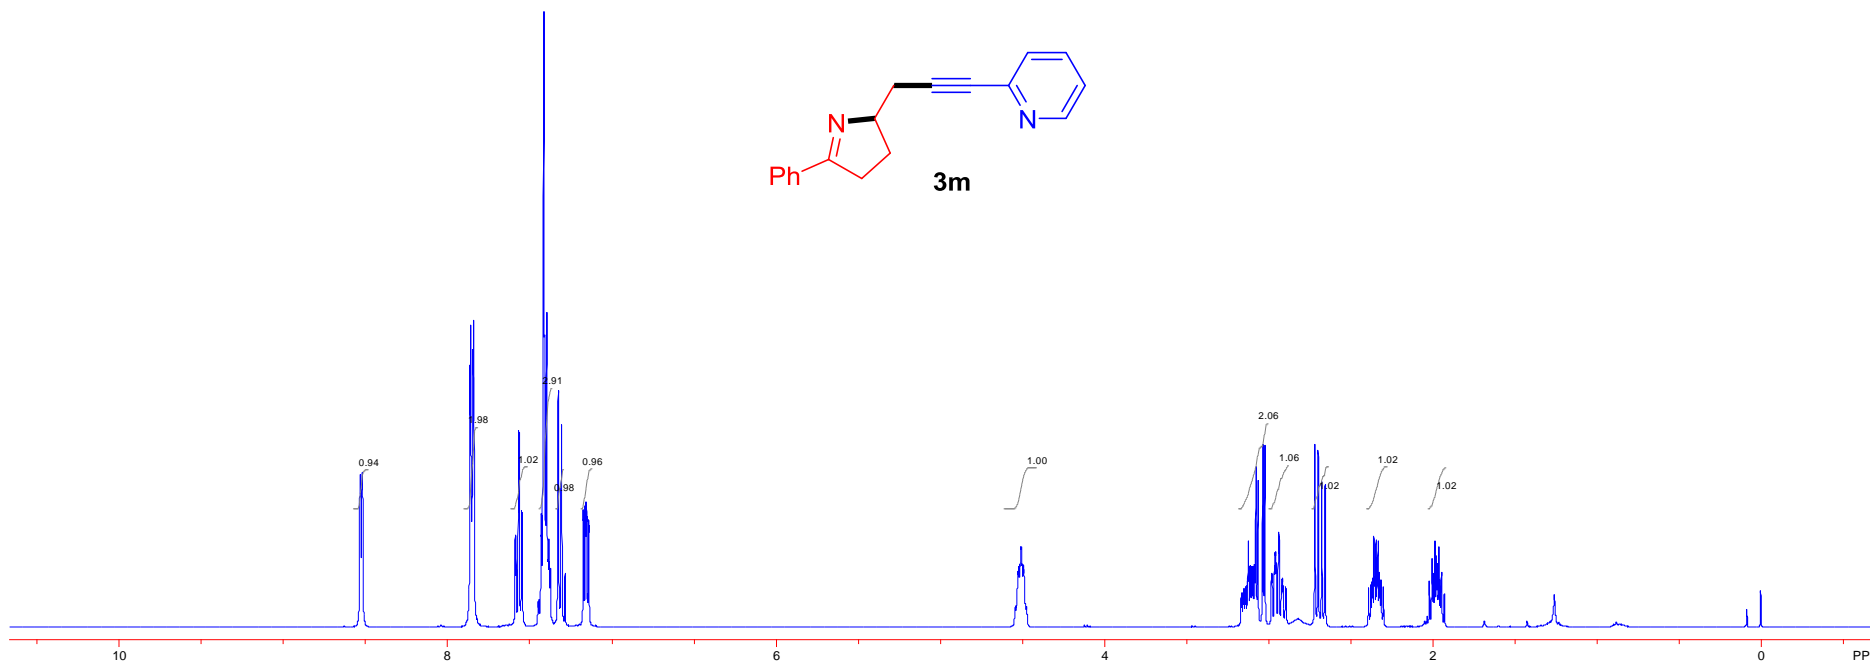

$^{13}\text{C}$  NMR (100 MHz,  $\text{CDCl}_3$ )

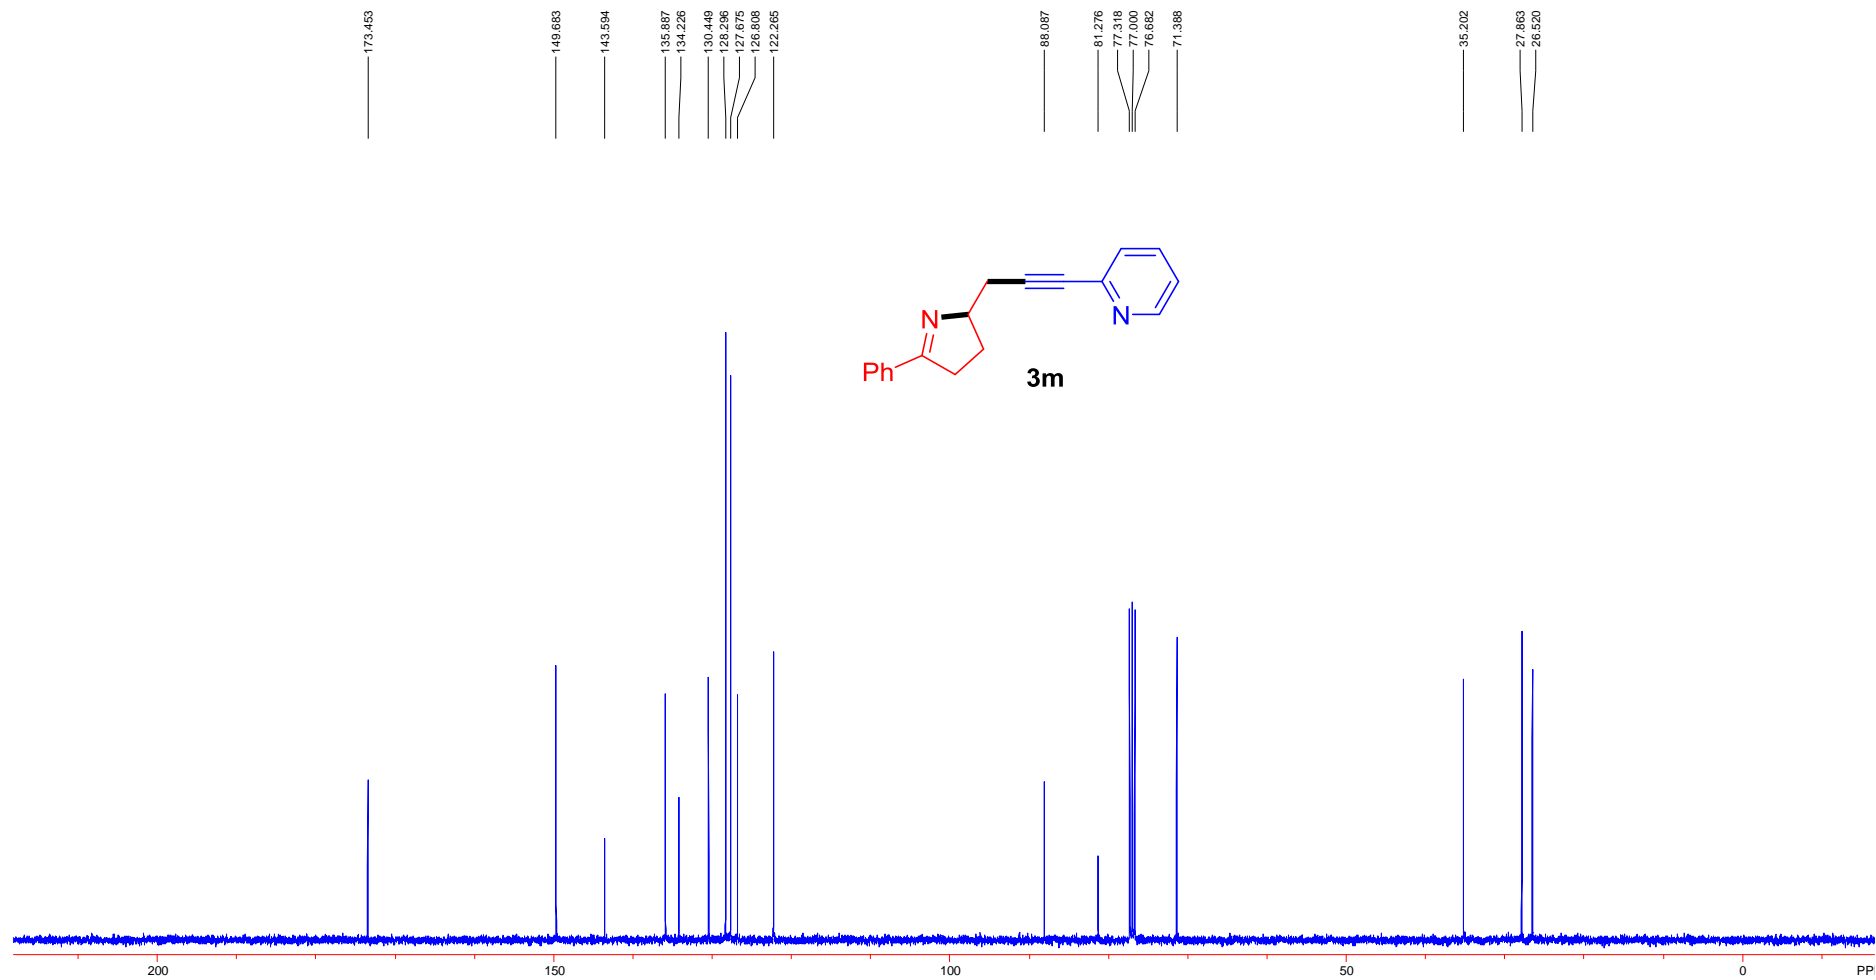

$^1\text{H}$  NMR(400 MHz,  $\text{CDCl}_3$ )

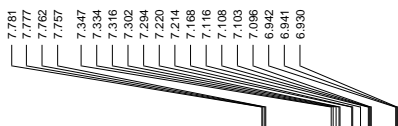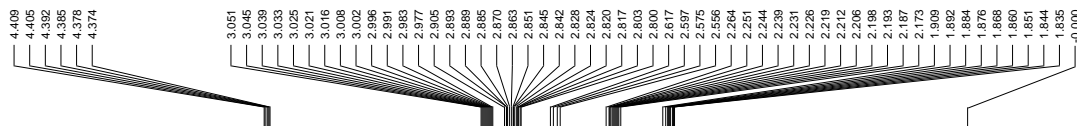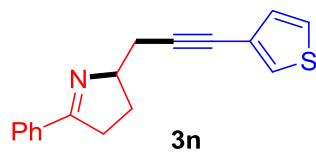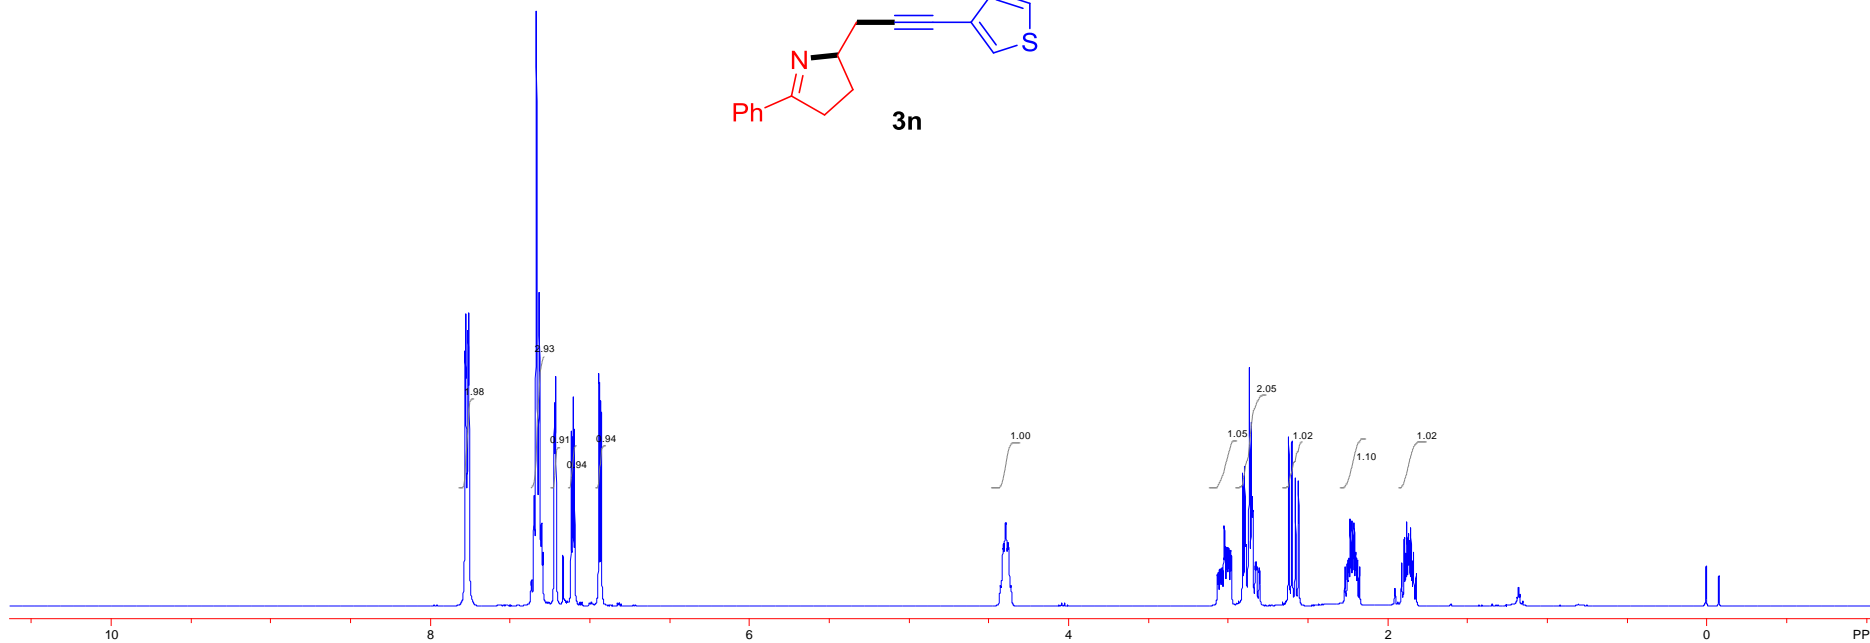

$^{13}\text{C}$  NMR (100 MHz,  $\text{CDCl}_3$ )

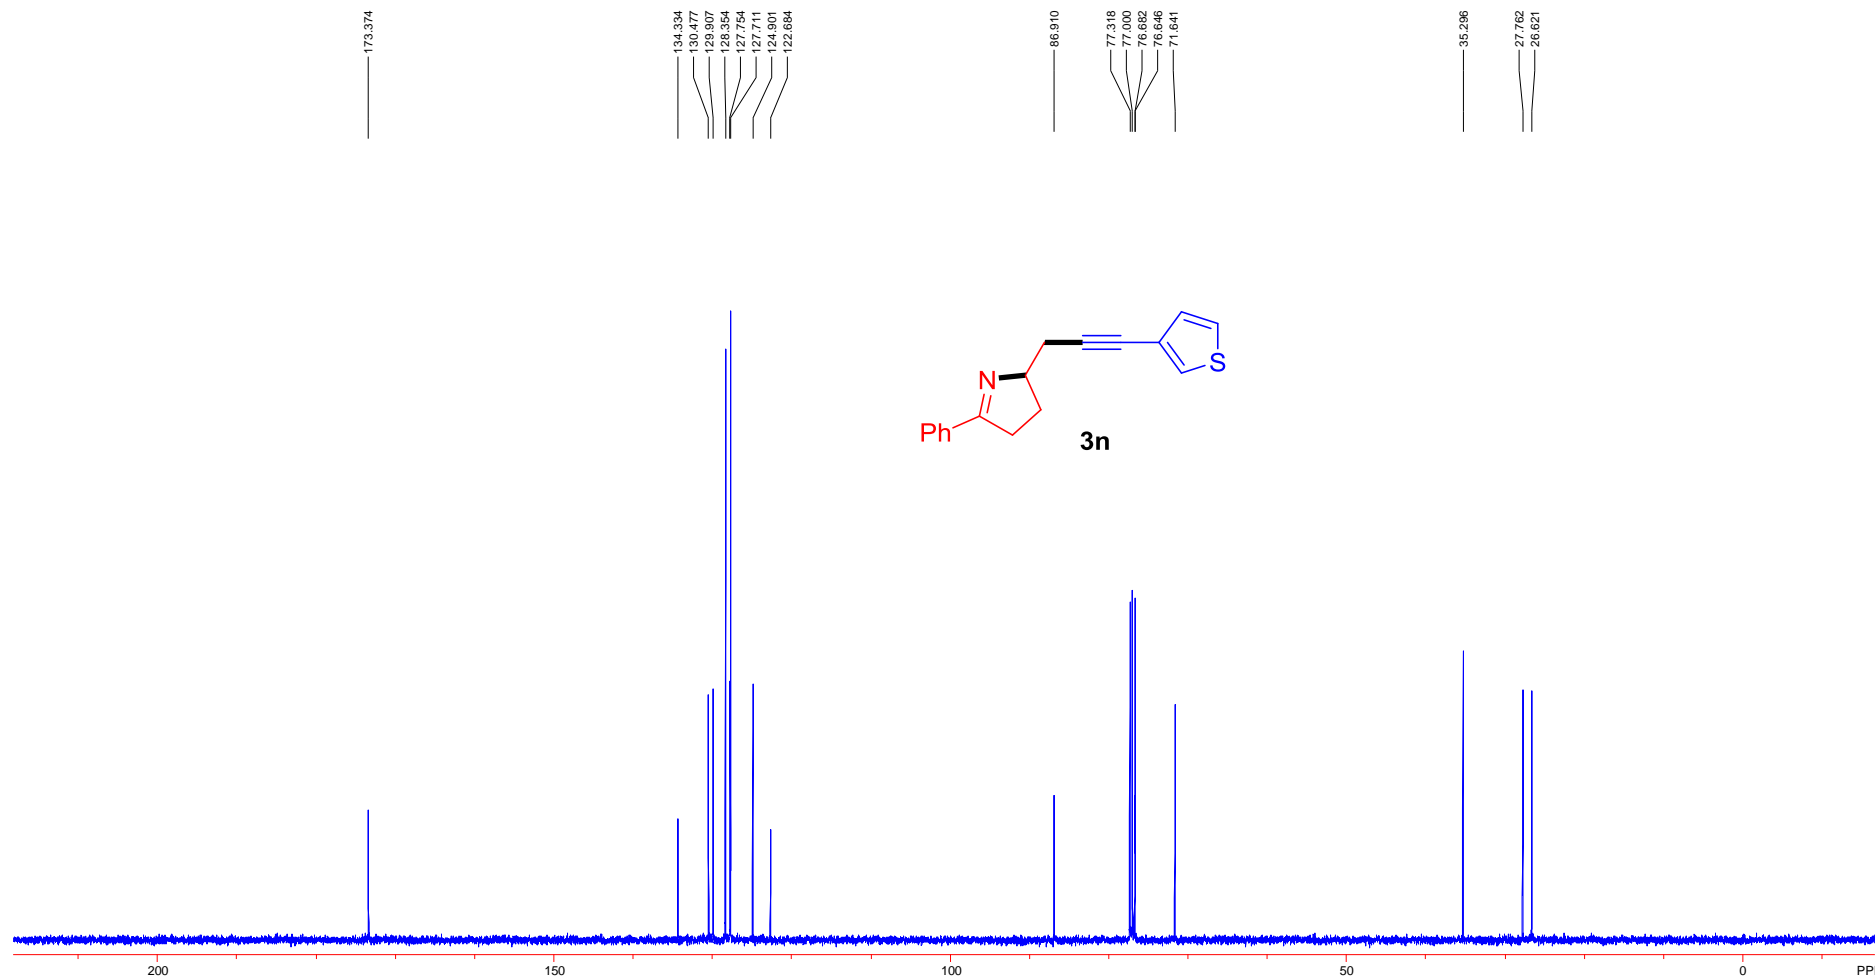

$^1\text{H}$  NMR(400 MHz,  $\text{CDCl}_3$ )

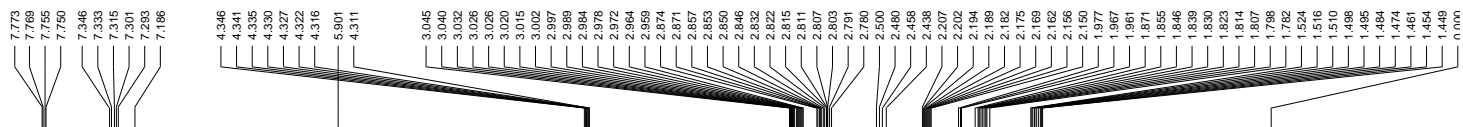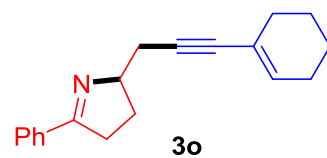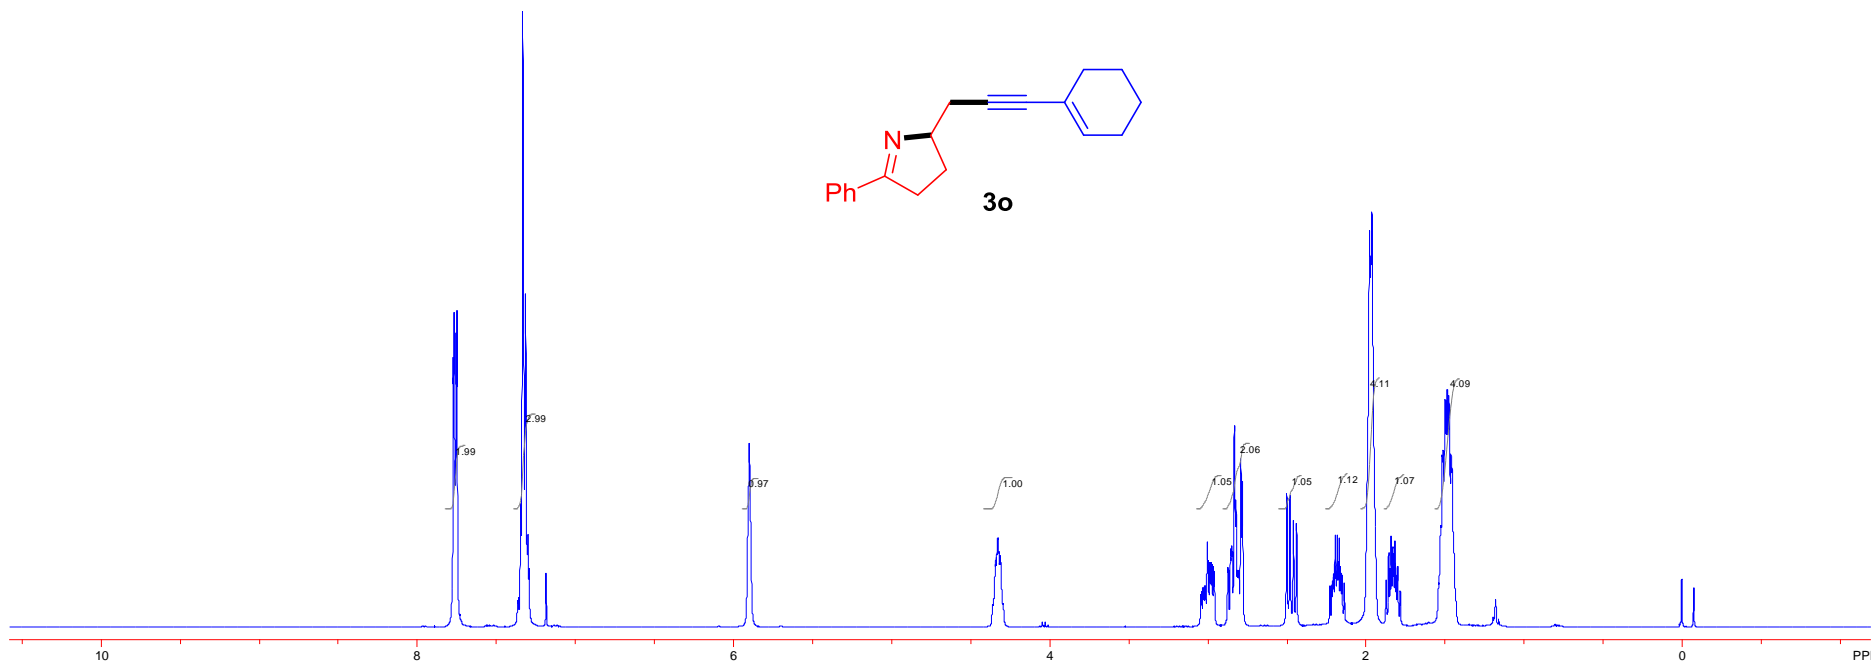

$^{13}\text{C}$  NMR (100 MHz,  $\text{CDCl}_3$ )

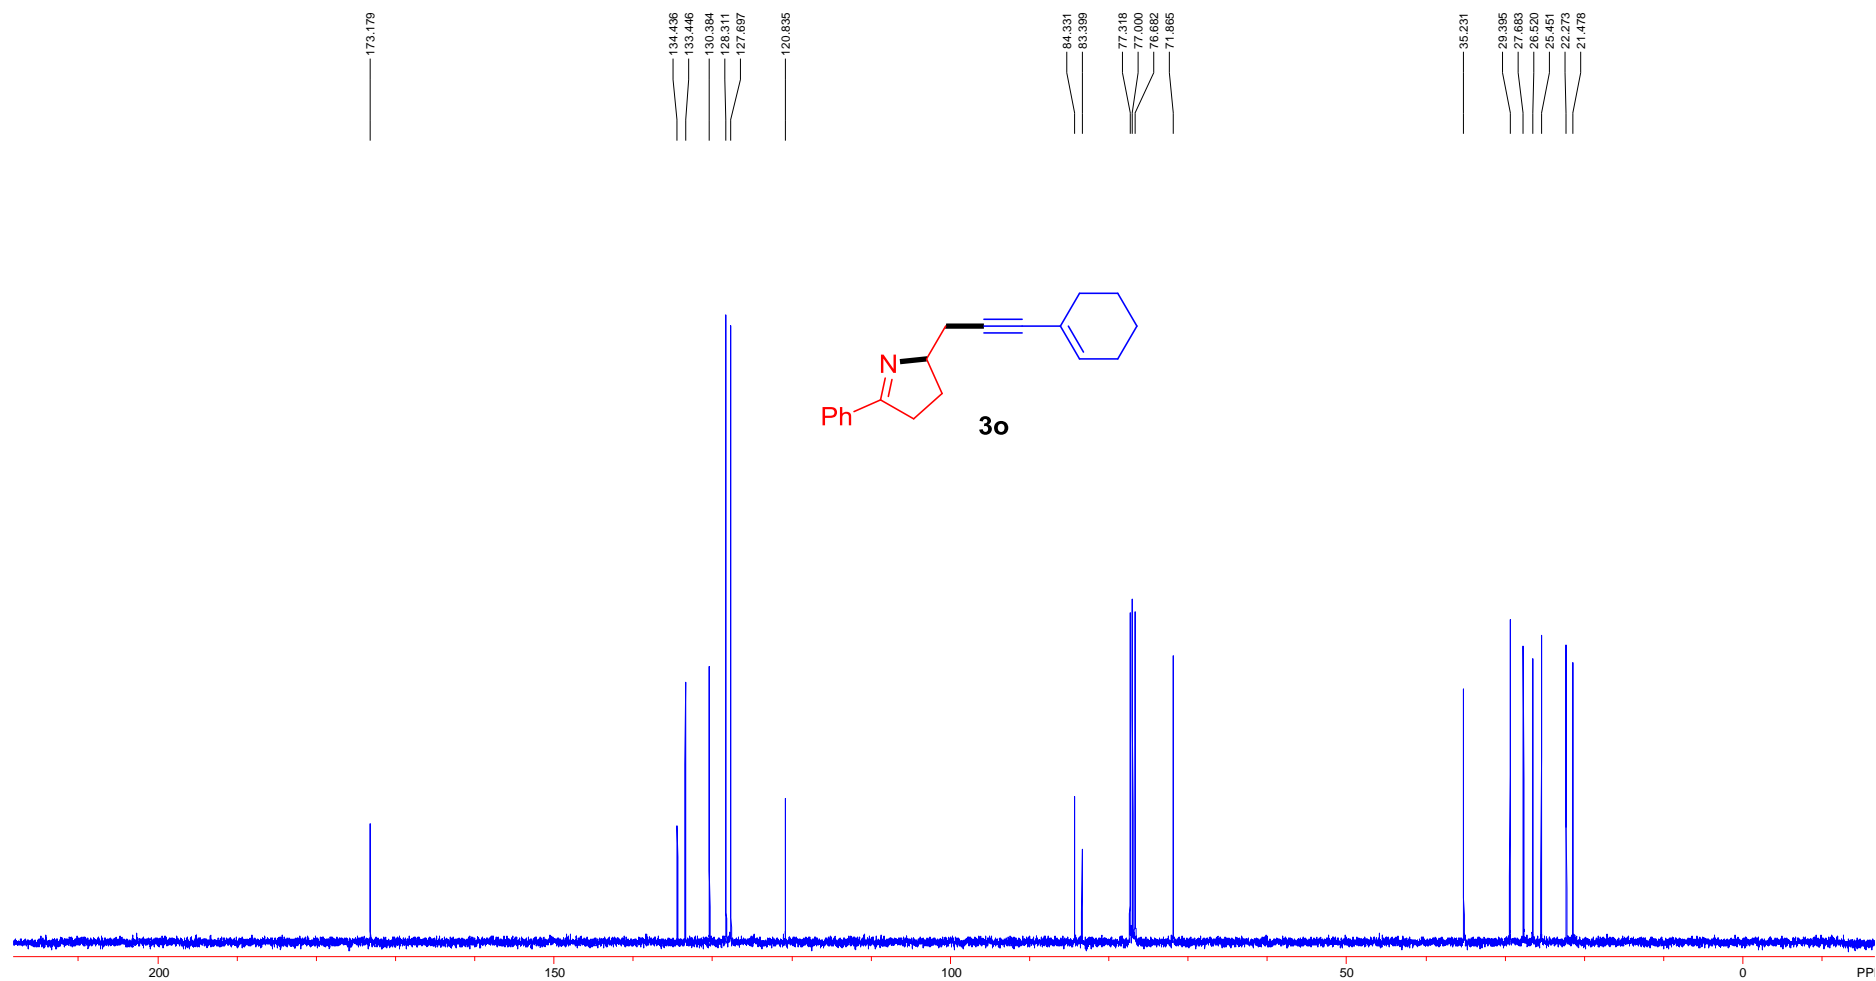

$^1\text{H}$  NMR(400 MHz,  $\text{CDCl}_3$ )

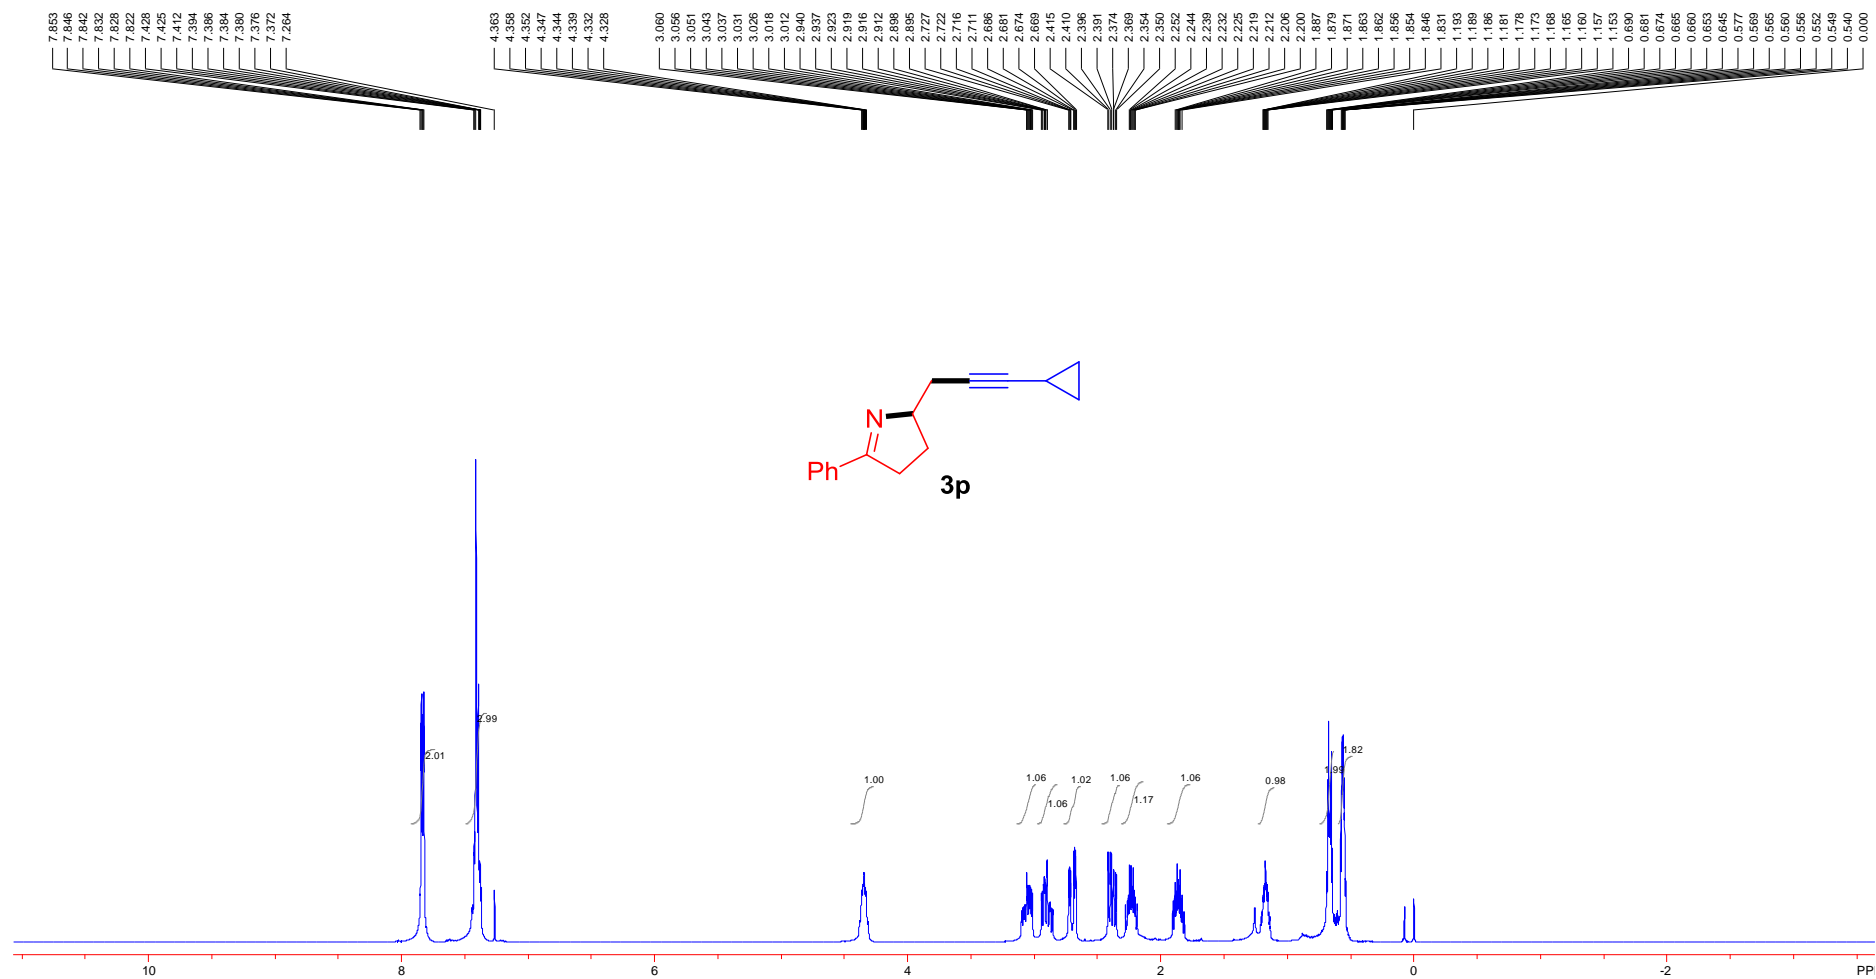



$^{13}\text{C}$  NMR (100 MHz,  $\text{CDCl}_3$ )

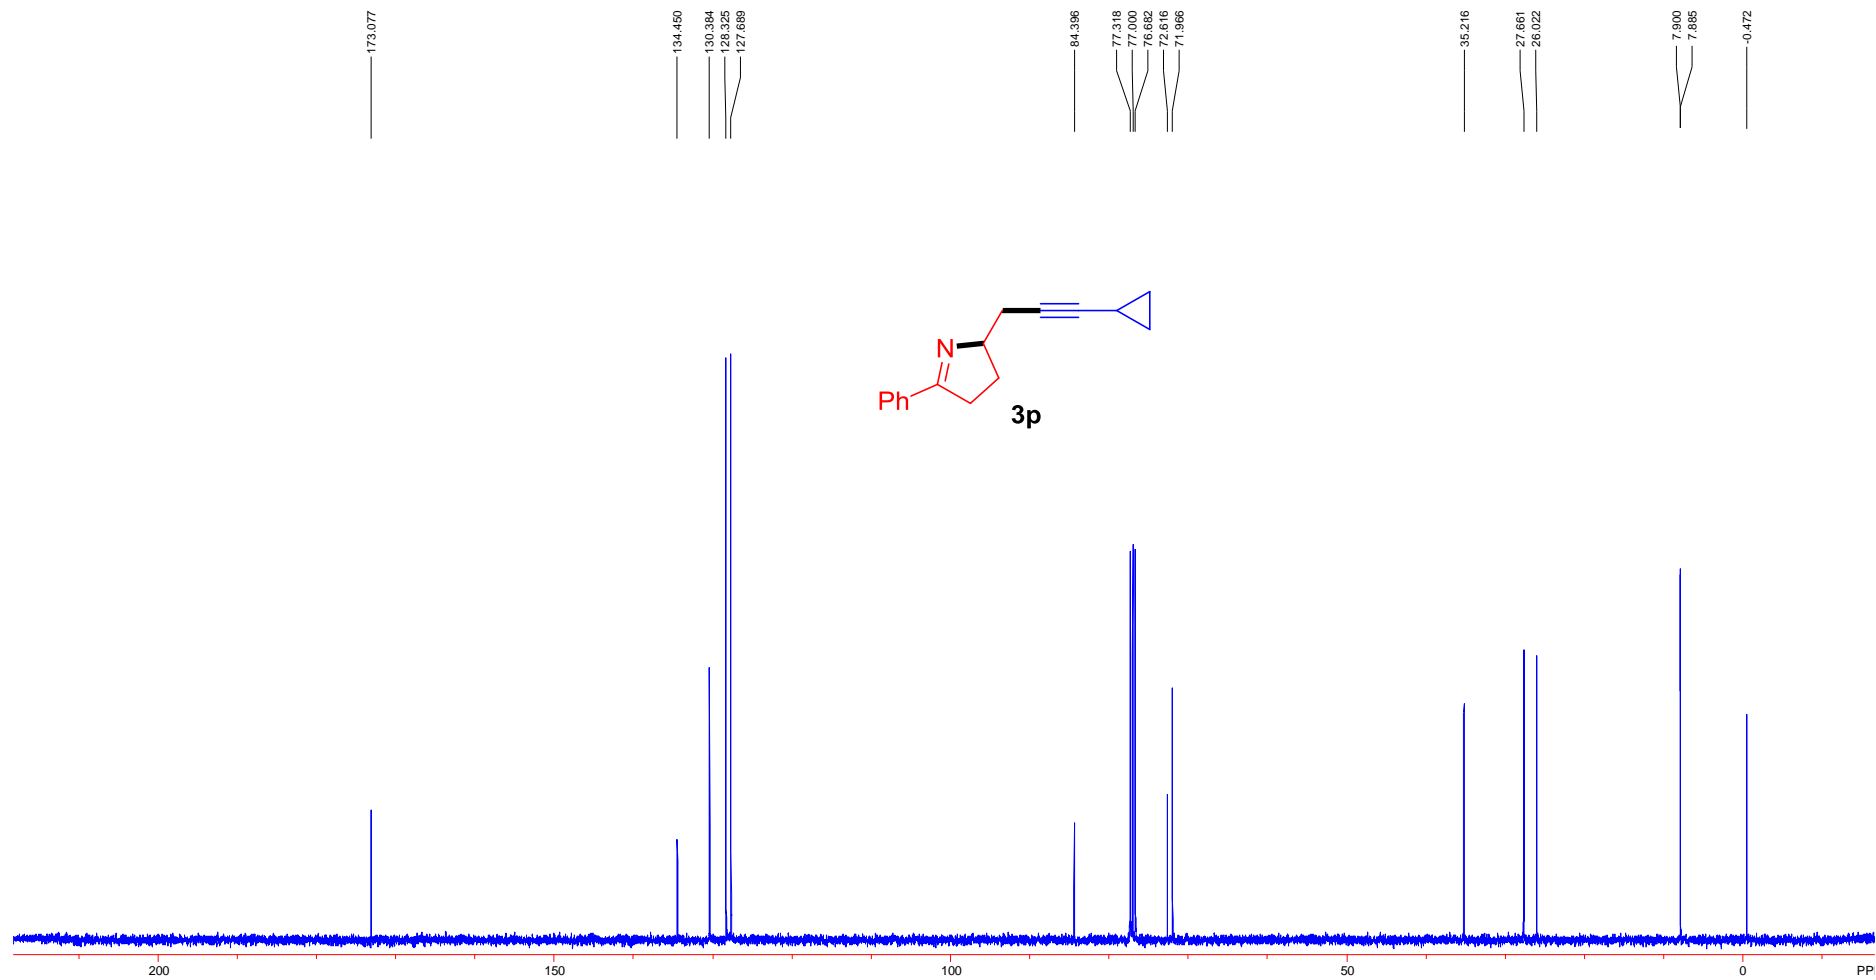

$^1\text{H}$  NMR(400 MHz,  $\text{CDCl}_3$ )

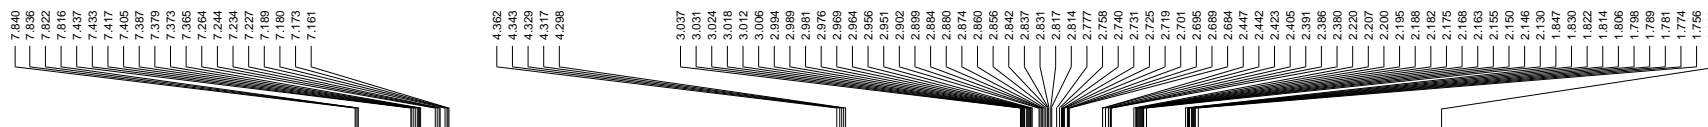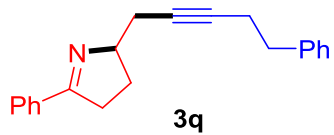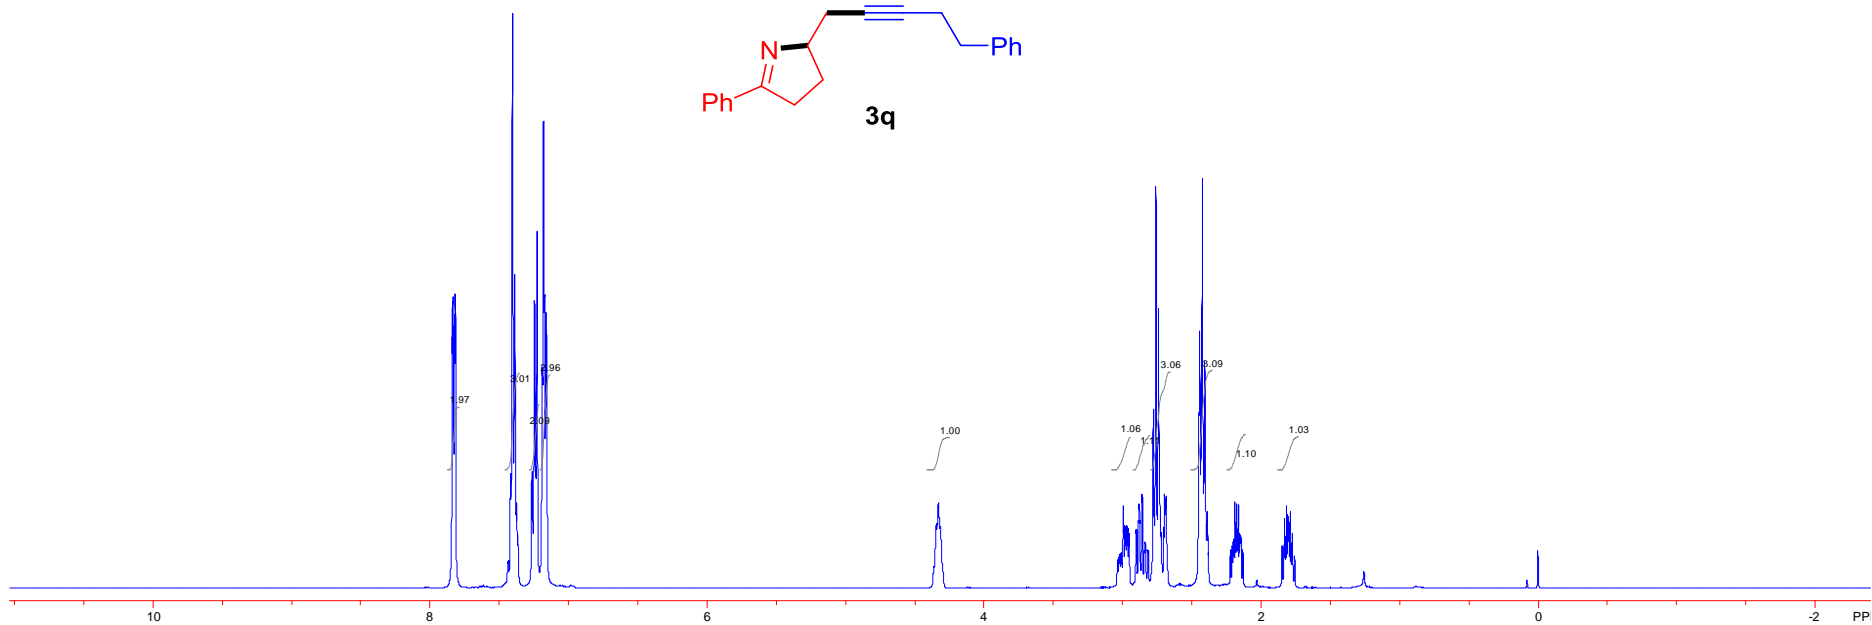

$^{13}\text{C}$  NMR (100 MHz,  $\text{CDCl}_3$ )

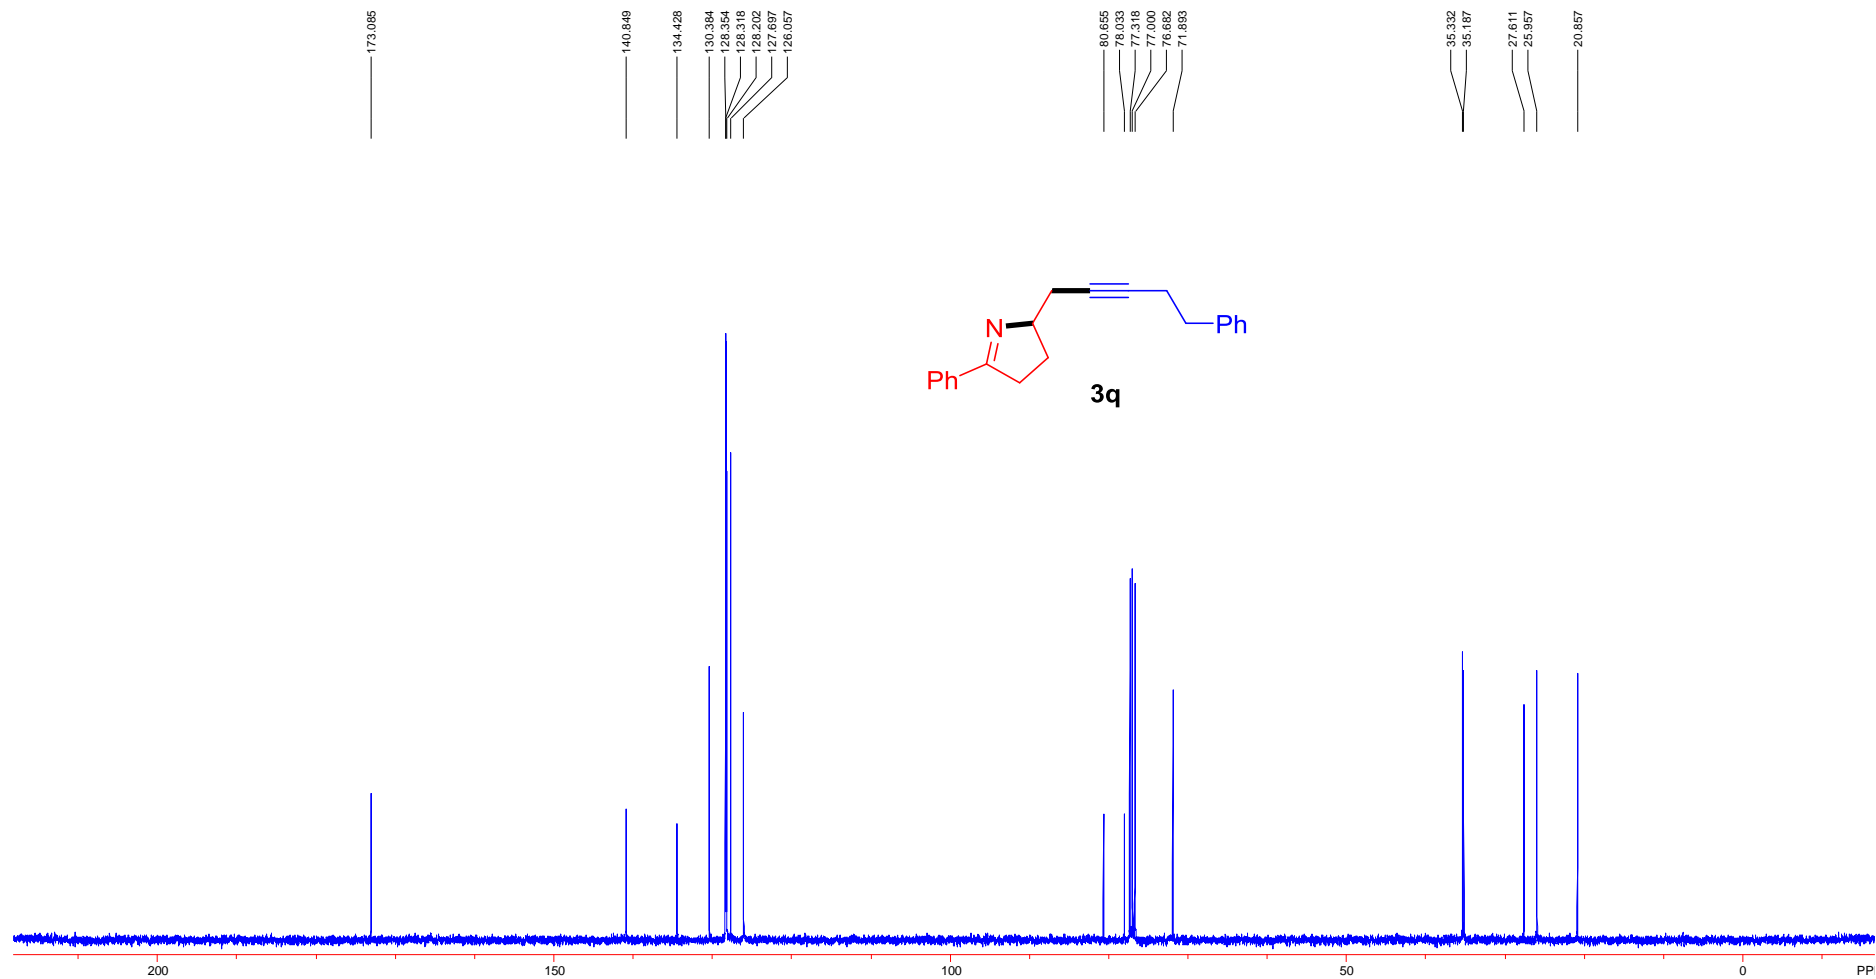

$^1\text{H}$  NMR(400 MHz,  $\text{CDCl}_3$ )

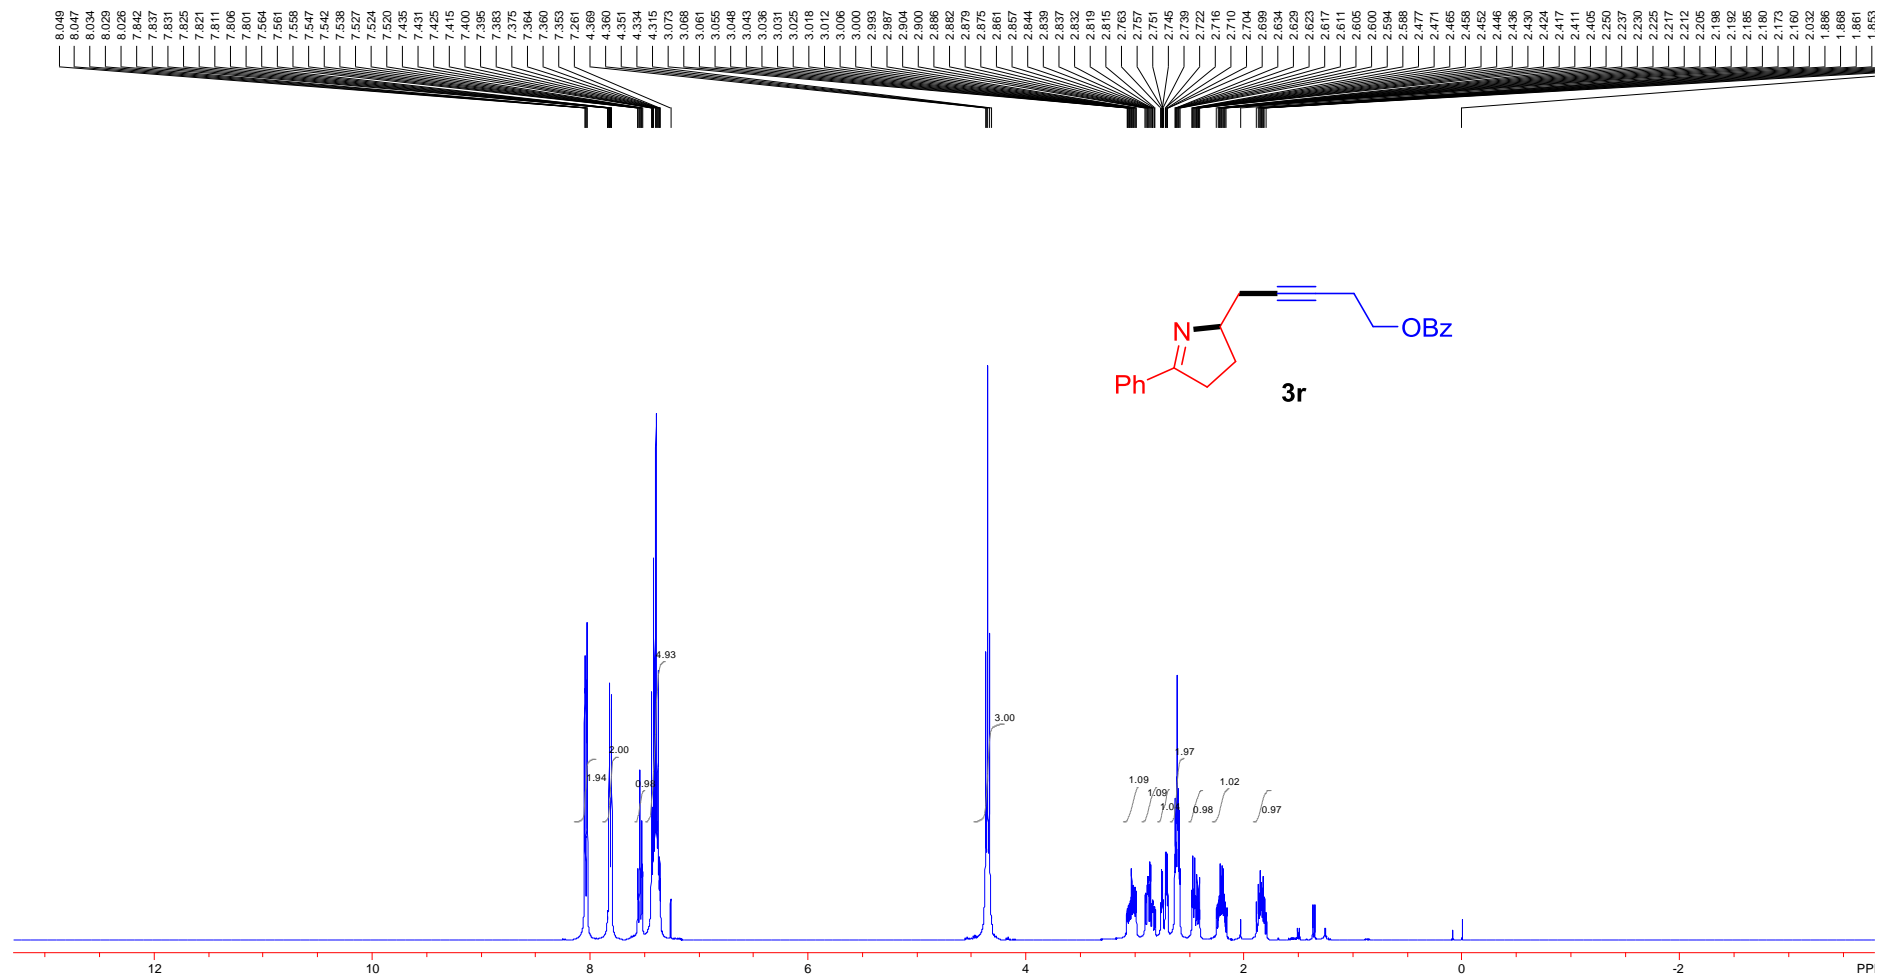

$^{13}\text{C}$  NMR (100 MHz,  $\text{CDCl}_3$ )

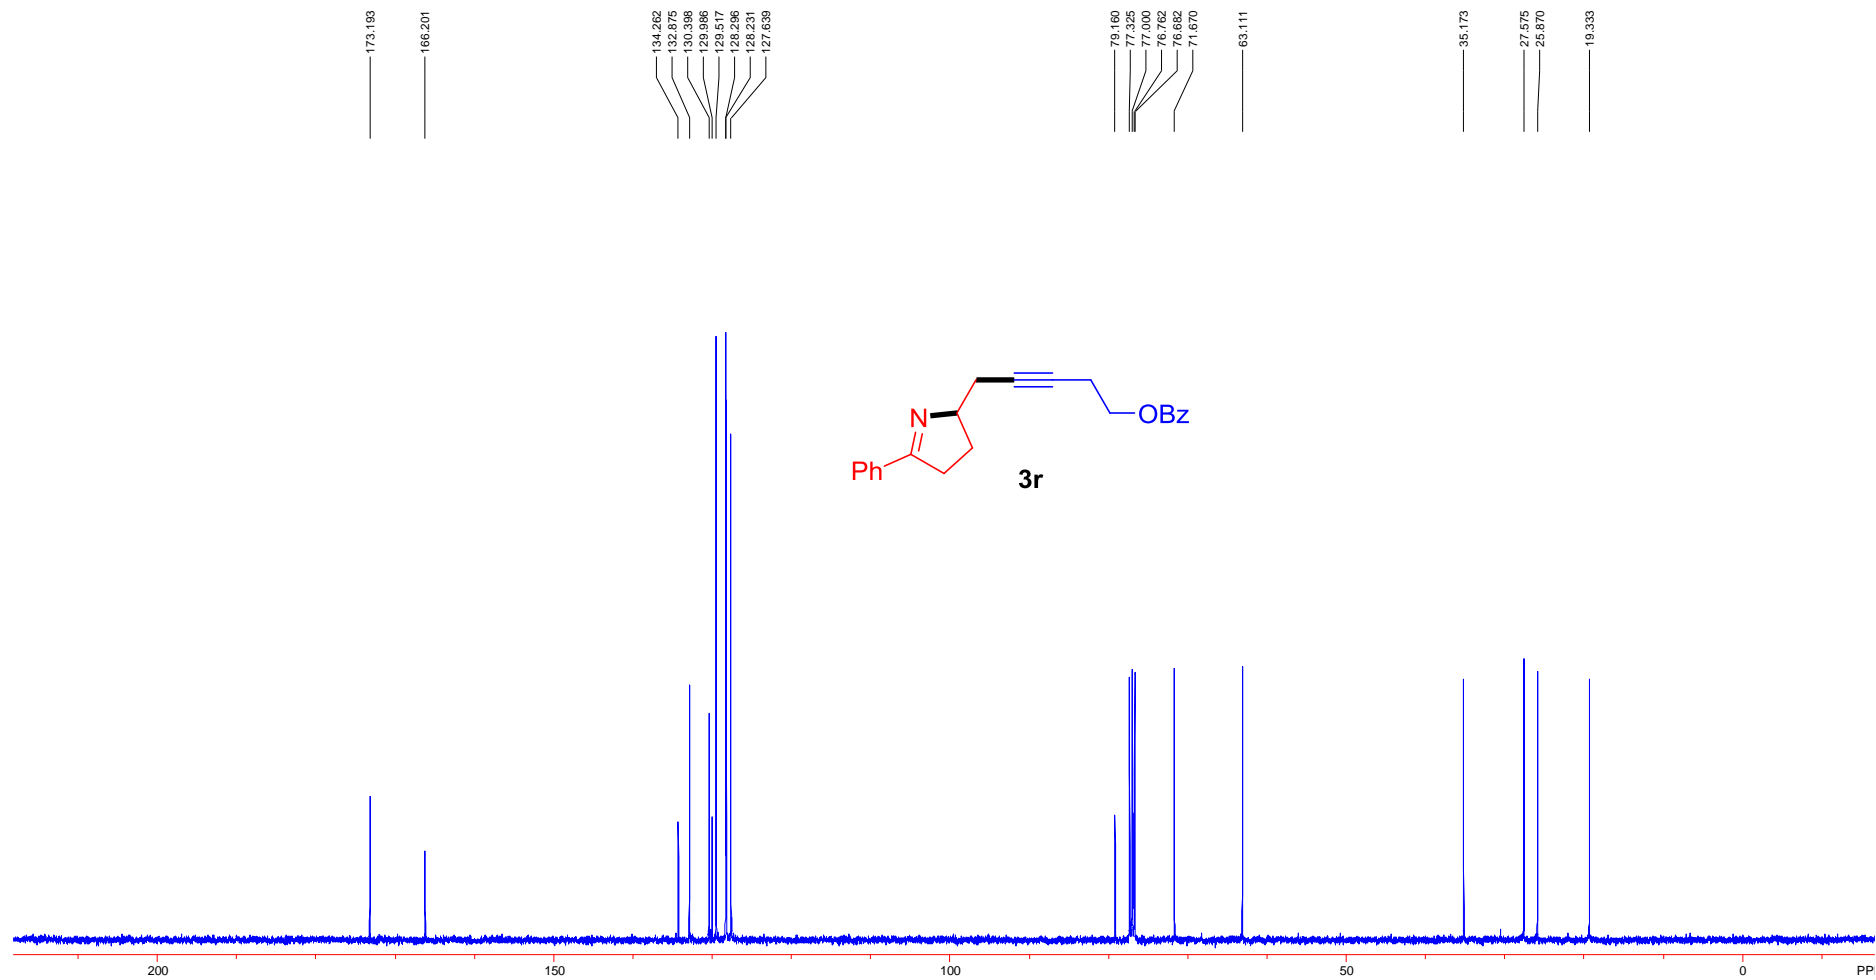

$^1\text{H}$  NMR(400 MHz,  $\text{CDCl}_3$ )

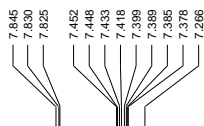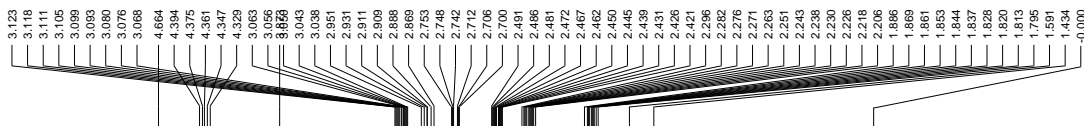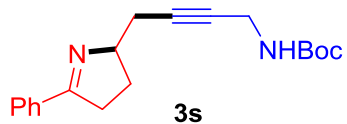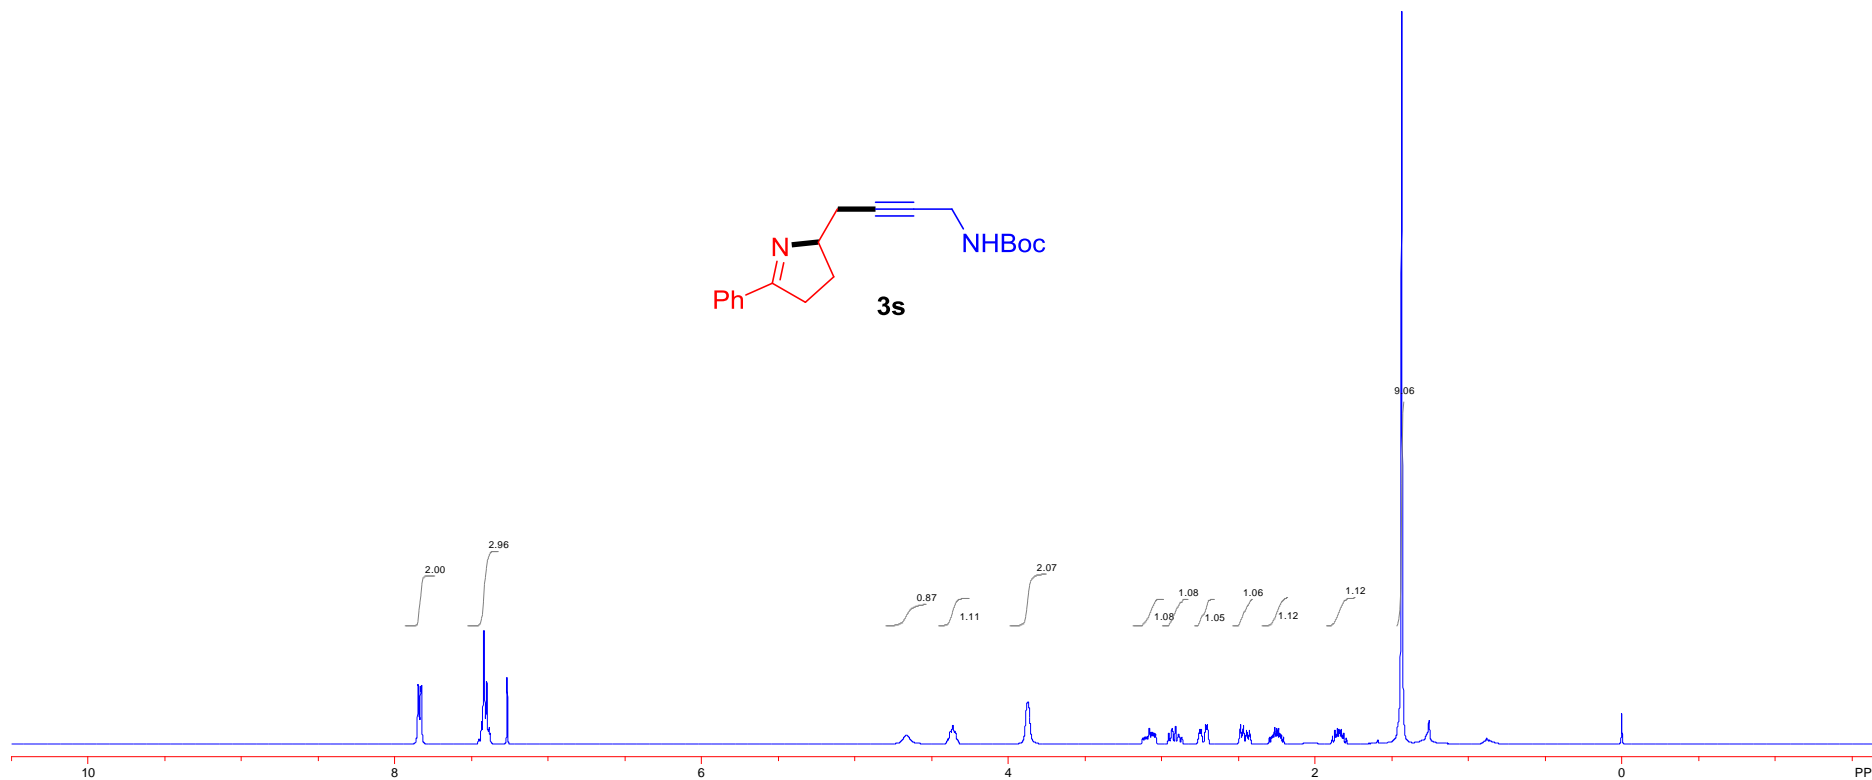

$^{13}\text{C}$  NMR (151 MHz,  $\text{CDCl}_3$ )

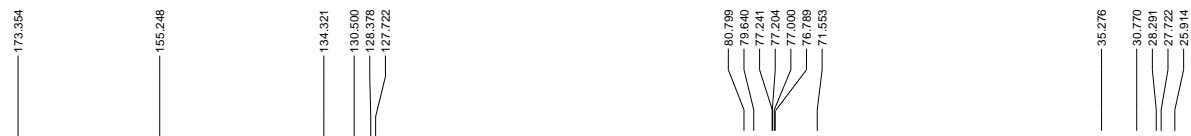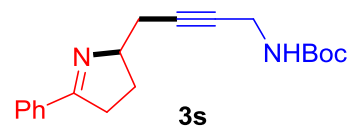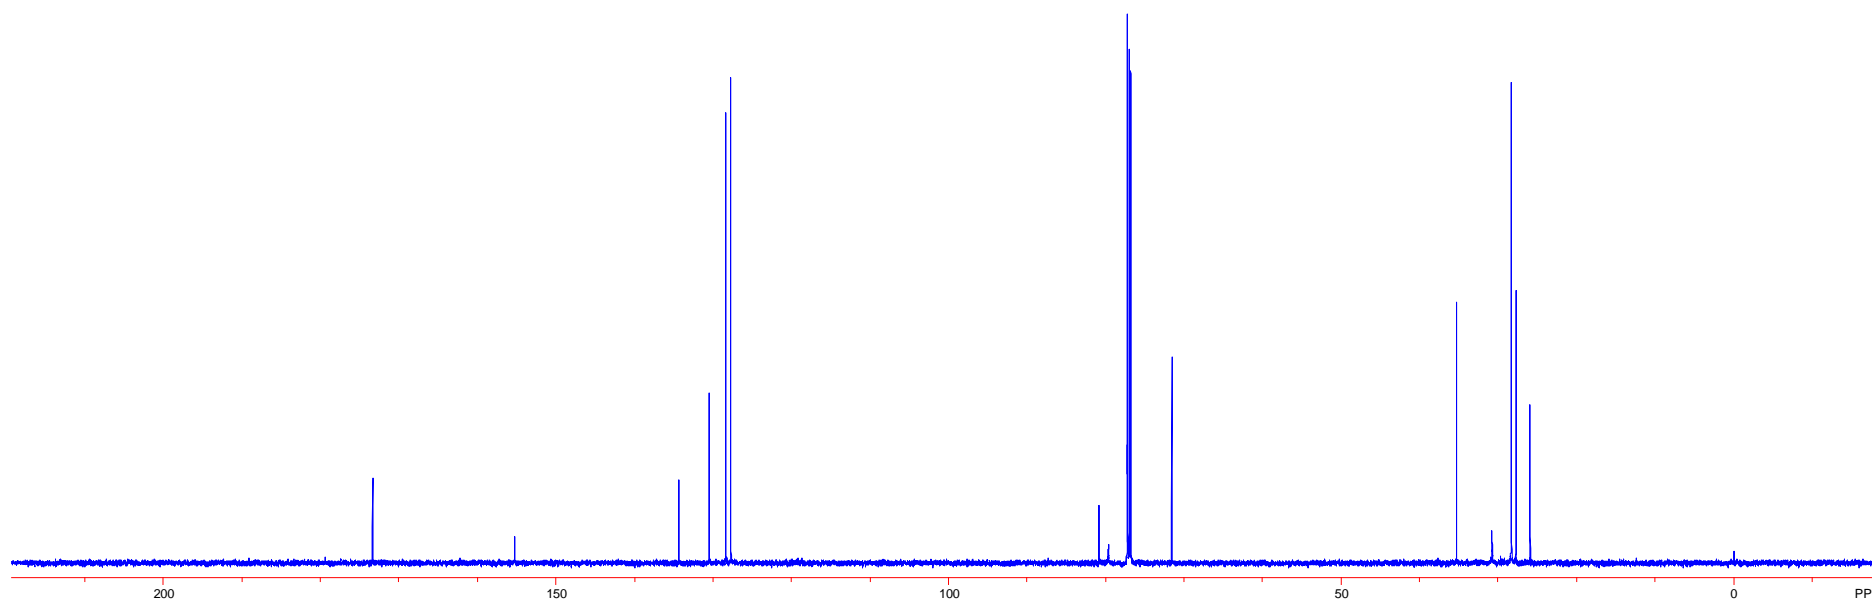

$^1\text{H}$  NMR(400 MHz,  $\text{CDCl}_3$ )

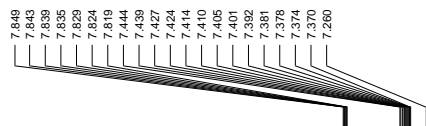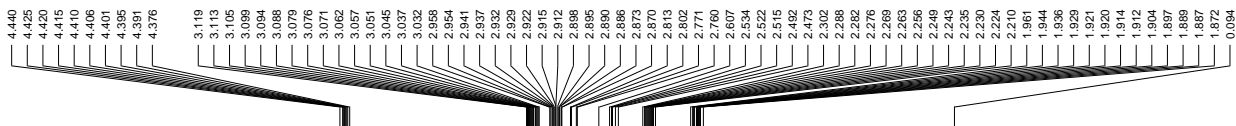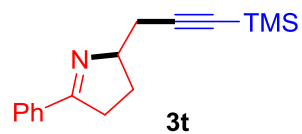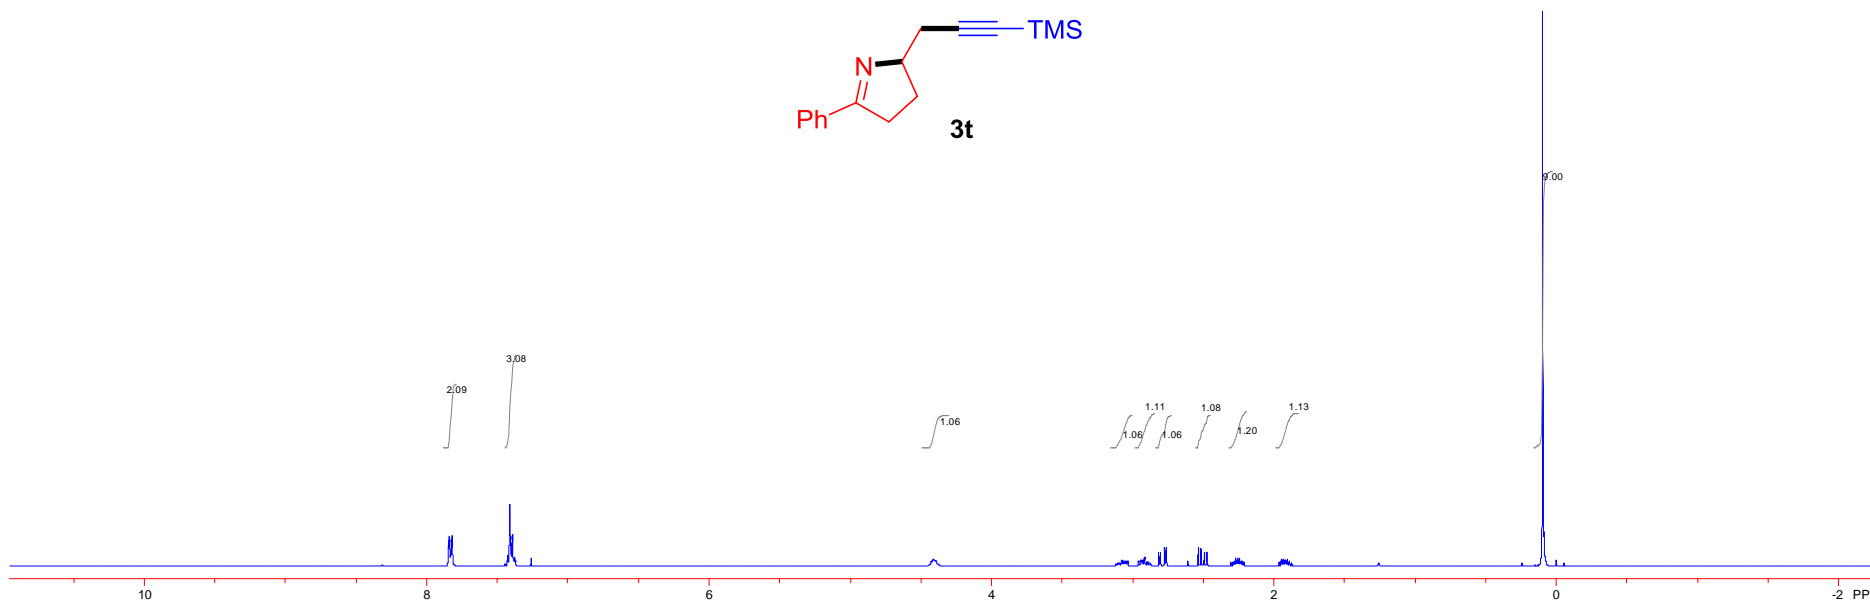



$^{13}\text{C}$  NMR (100 MHz,  $\text{CDCl}_3$ )

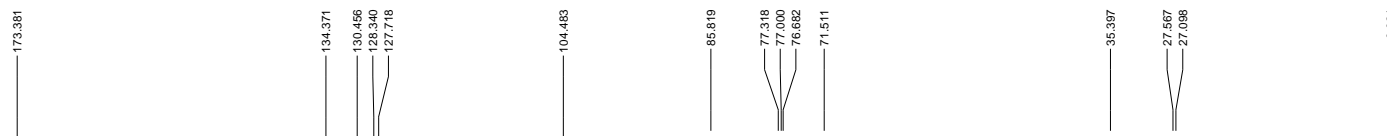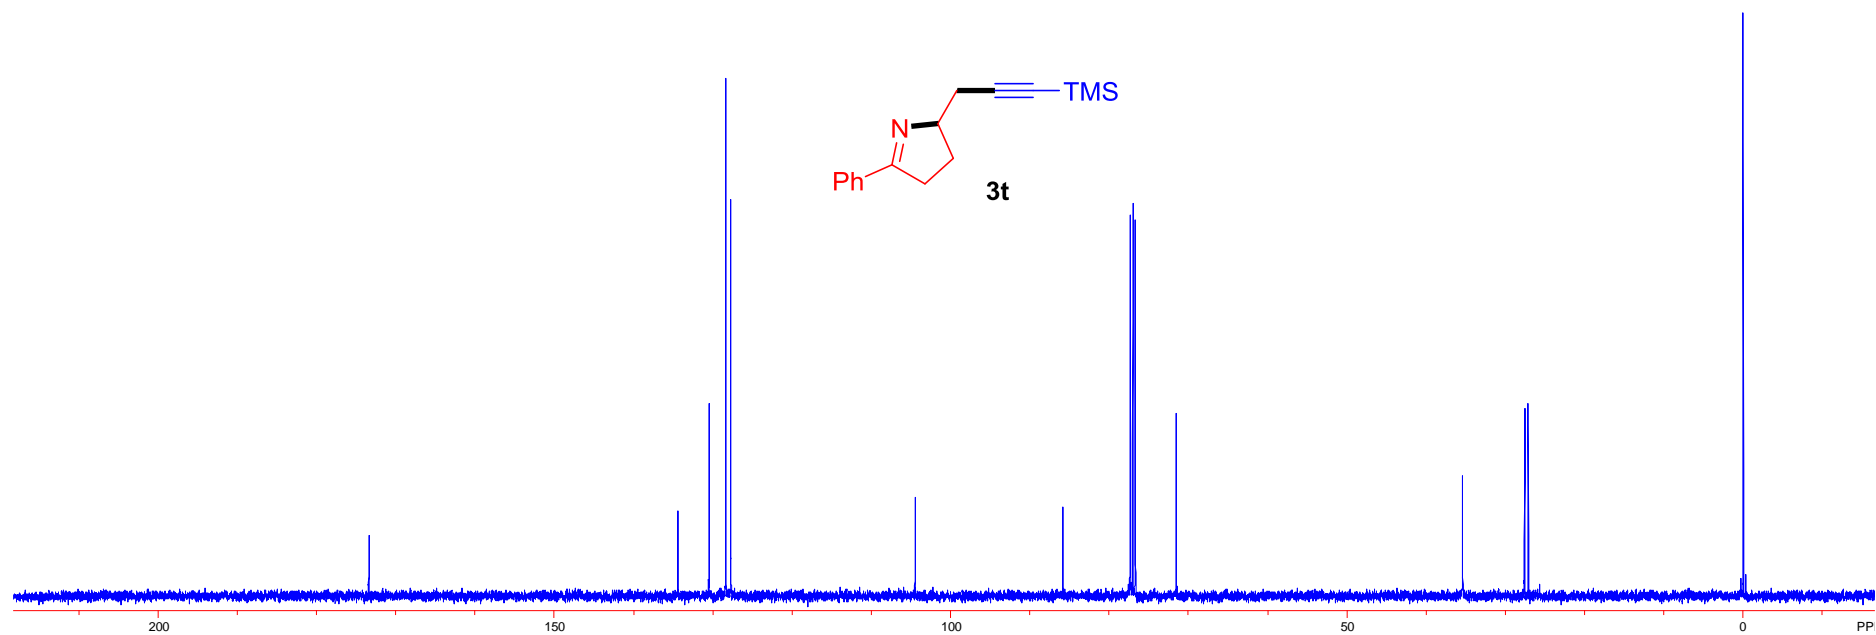

<sup>1</sup>H NMR(400 MHz, CDCl<sub>3</sub>)

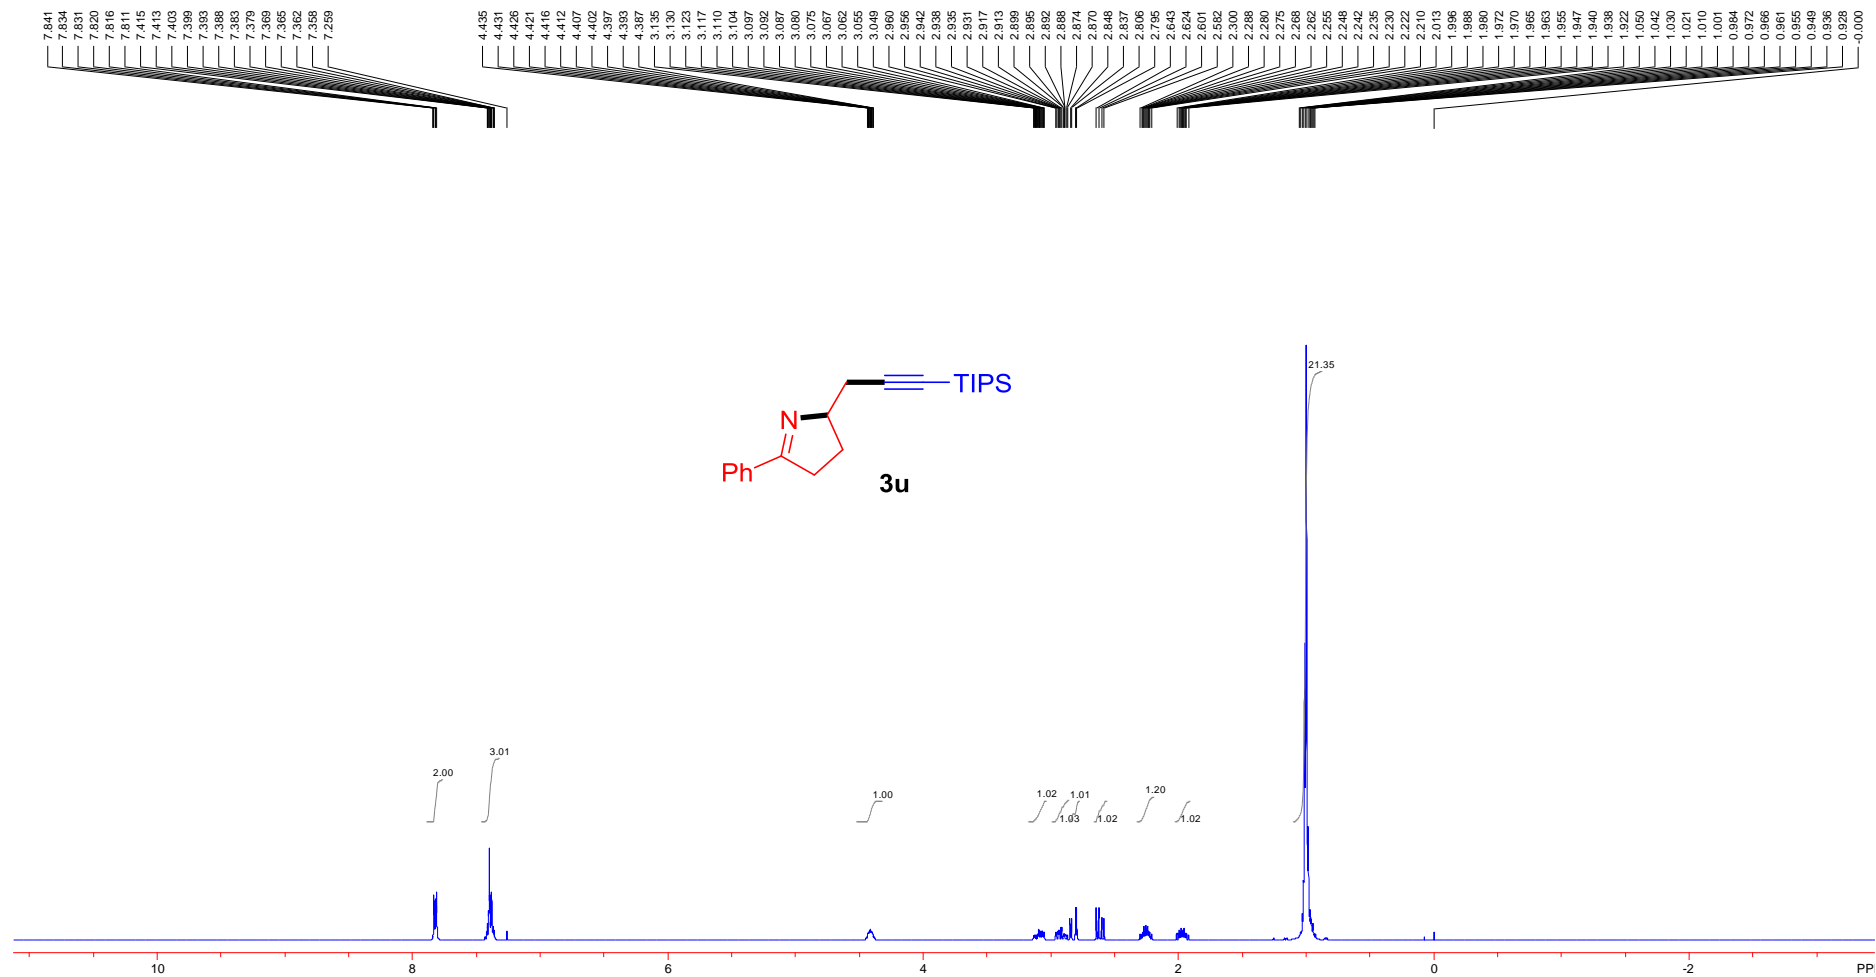

$^{13}\text{C}$  NMR (100 MHz,  $\text{CDCl}_3$ )

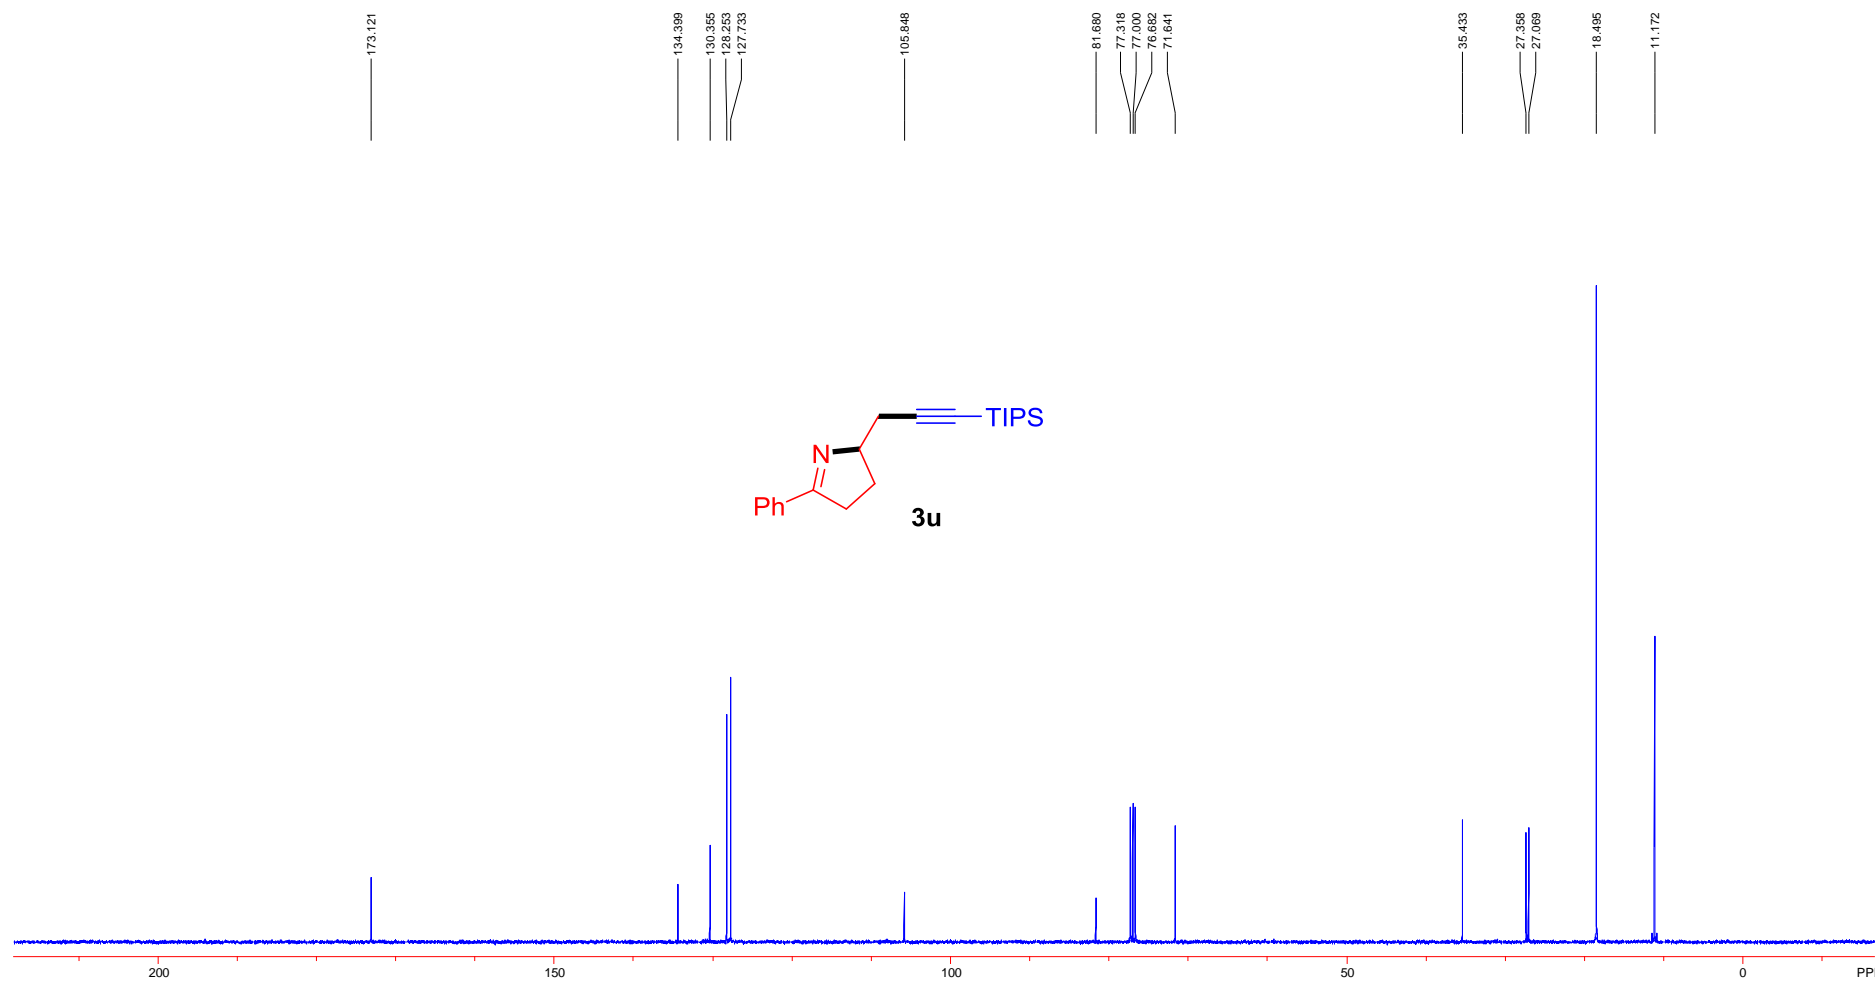

$^1\text{H}$  NMR(400 MHz,  $\text{CDCl}_3$ )

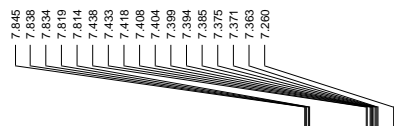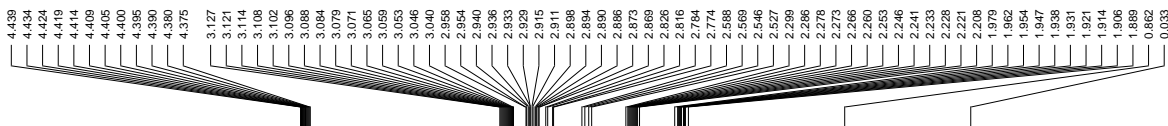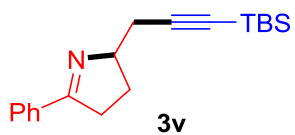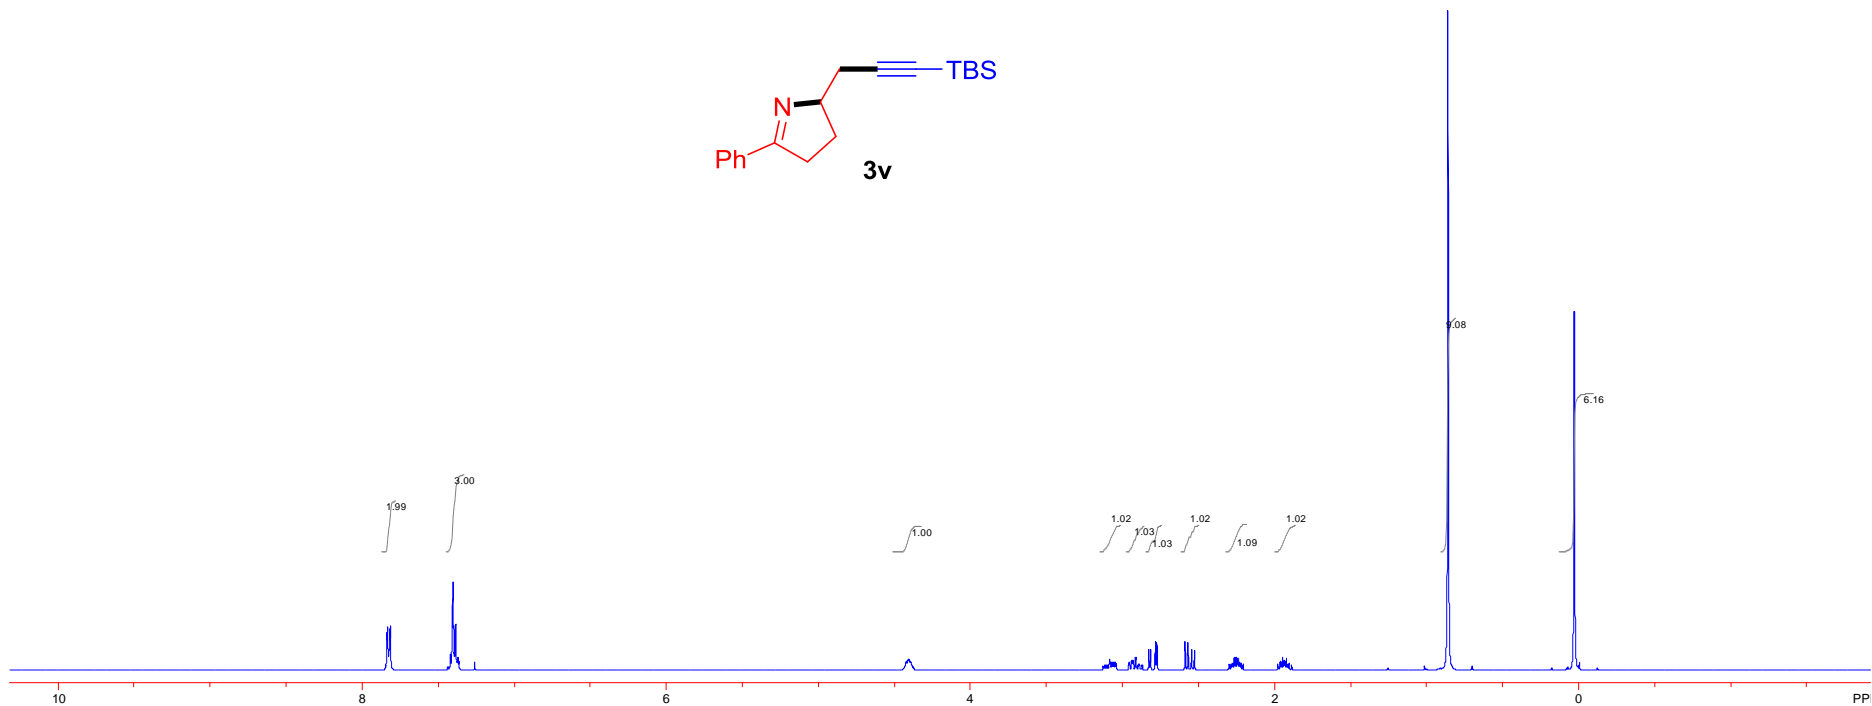

$^{13}\text{C}$  NMR (100 MHz,  $\text{CDCl}_3$ )

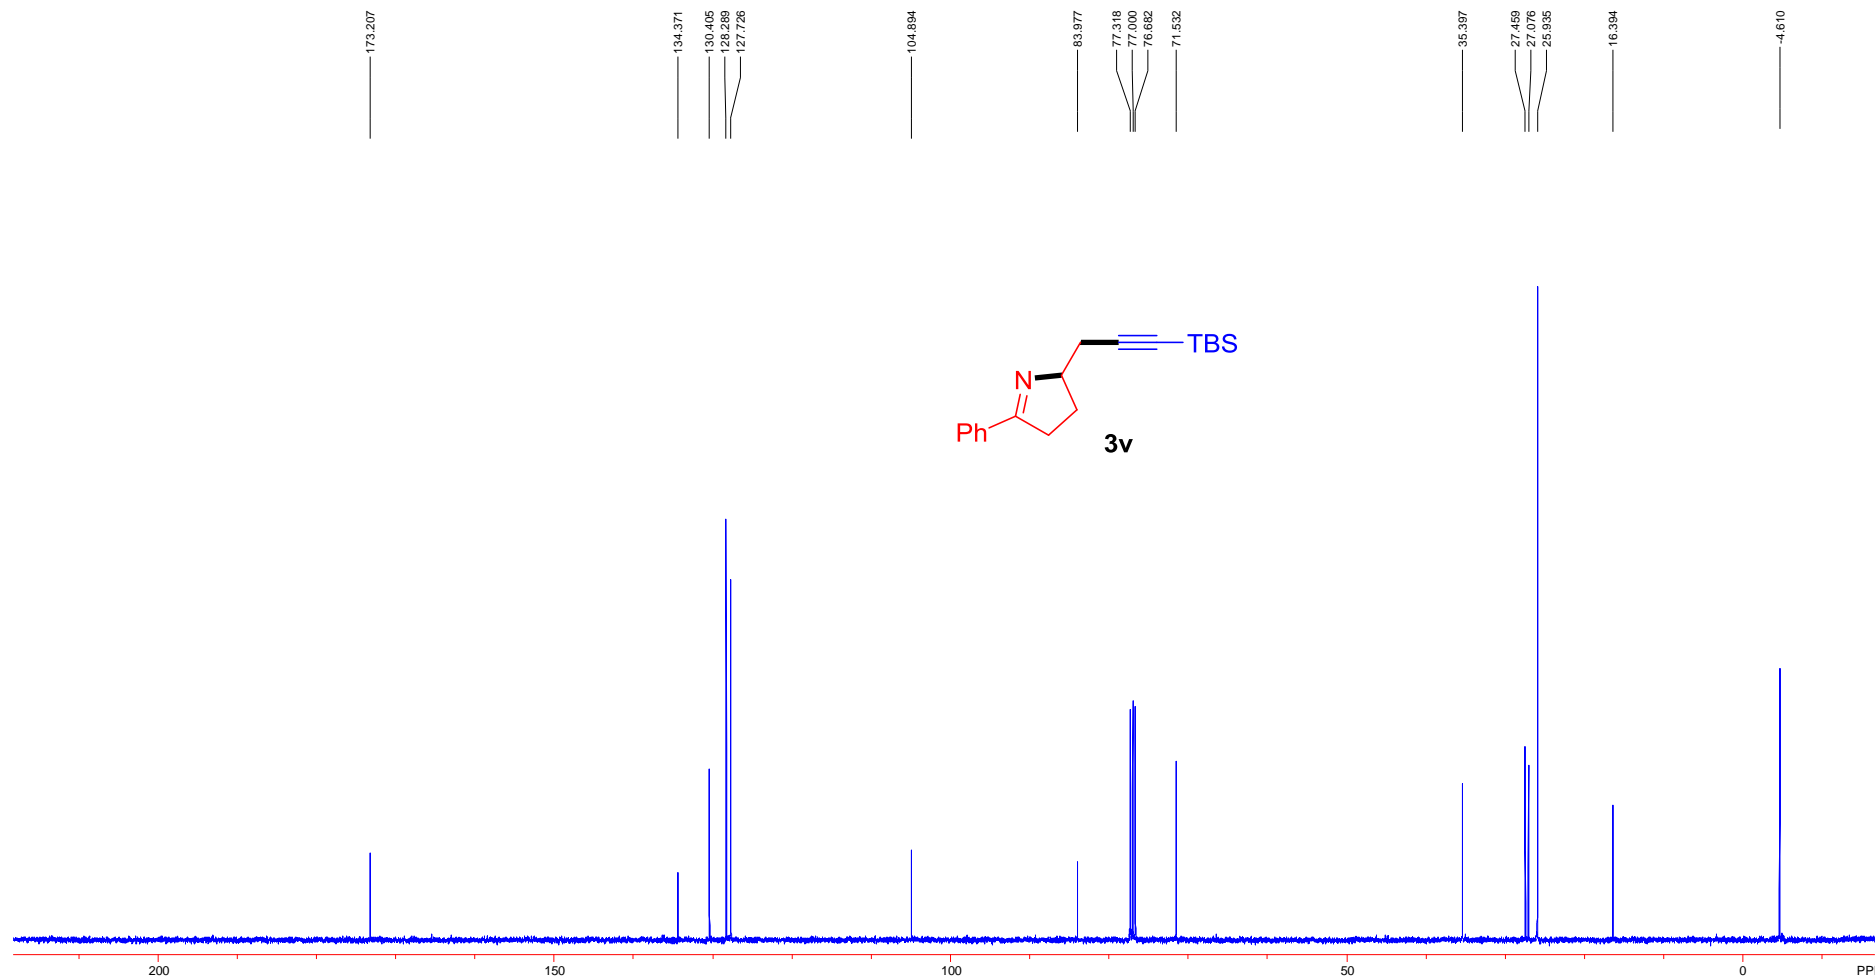

$^1\text{H}$  NMR(400 MHz,  $\text{CDCl}_3$ )

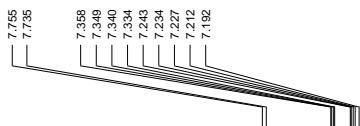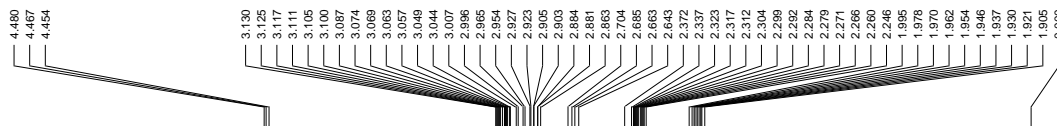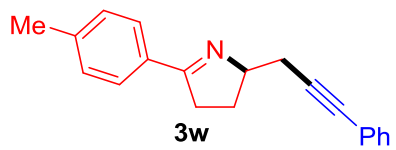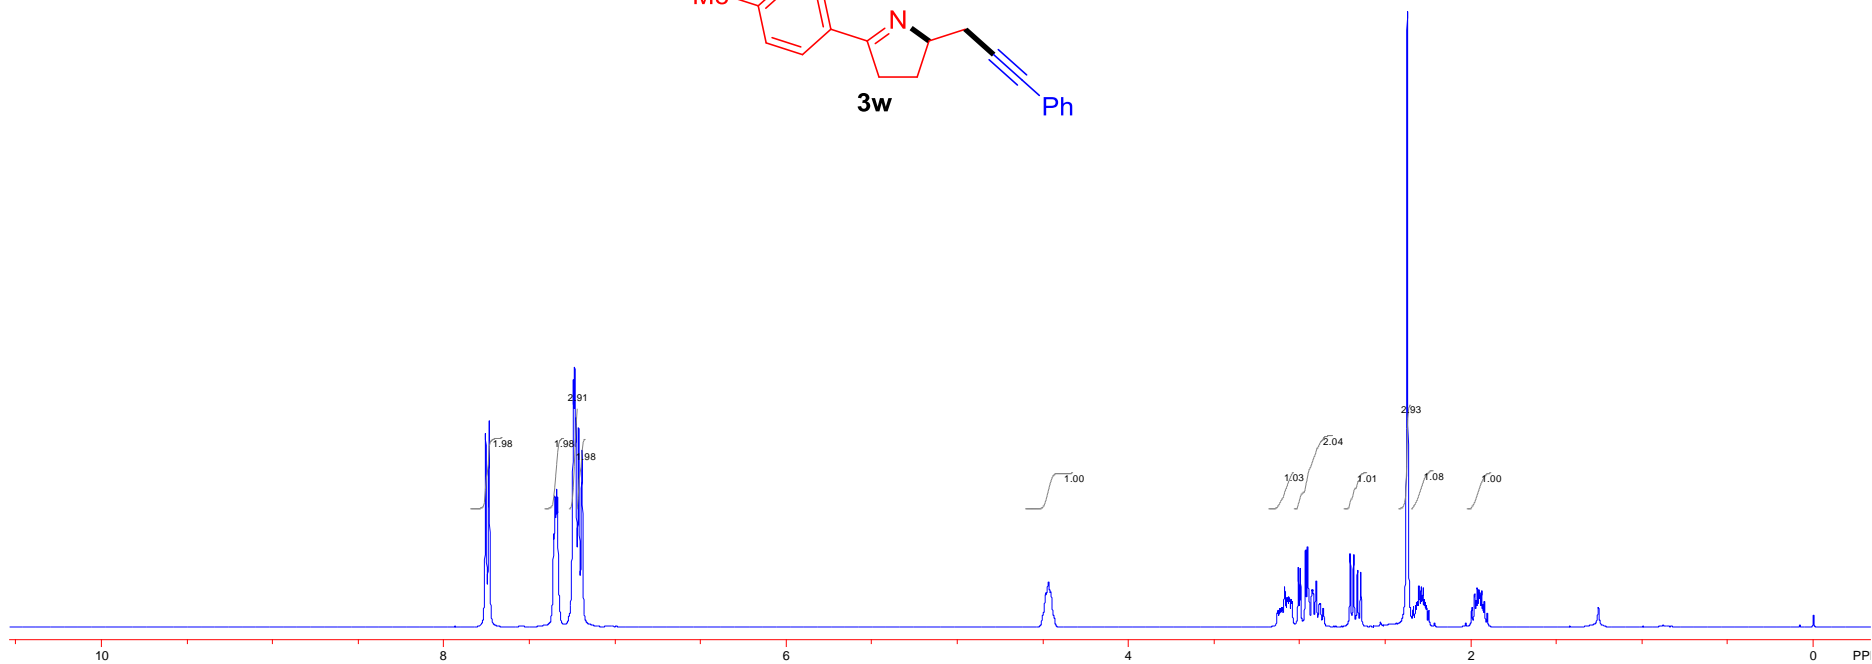

$^{13}\text{C}$  NMR (100 MHz,  $\text{CDCl}_3$ )

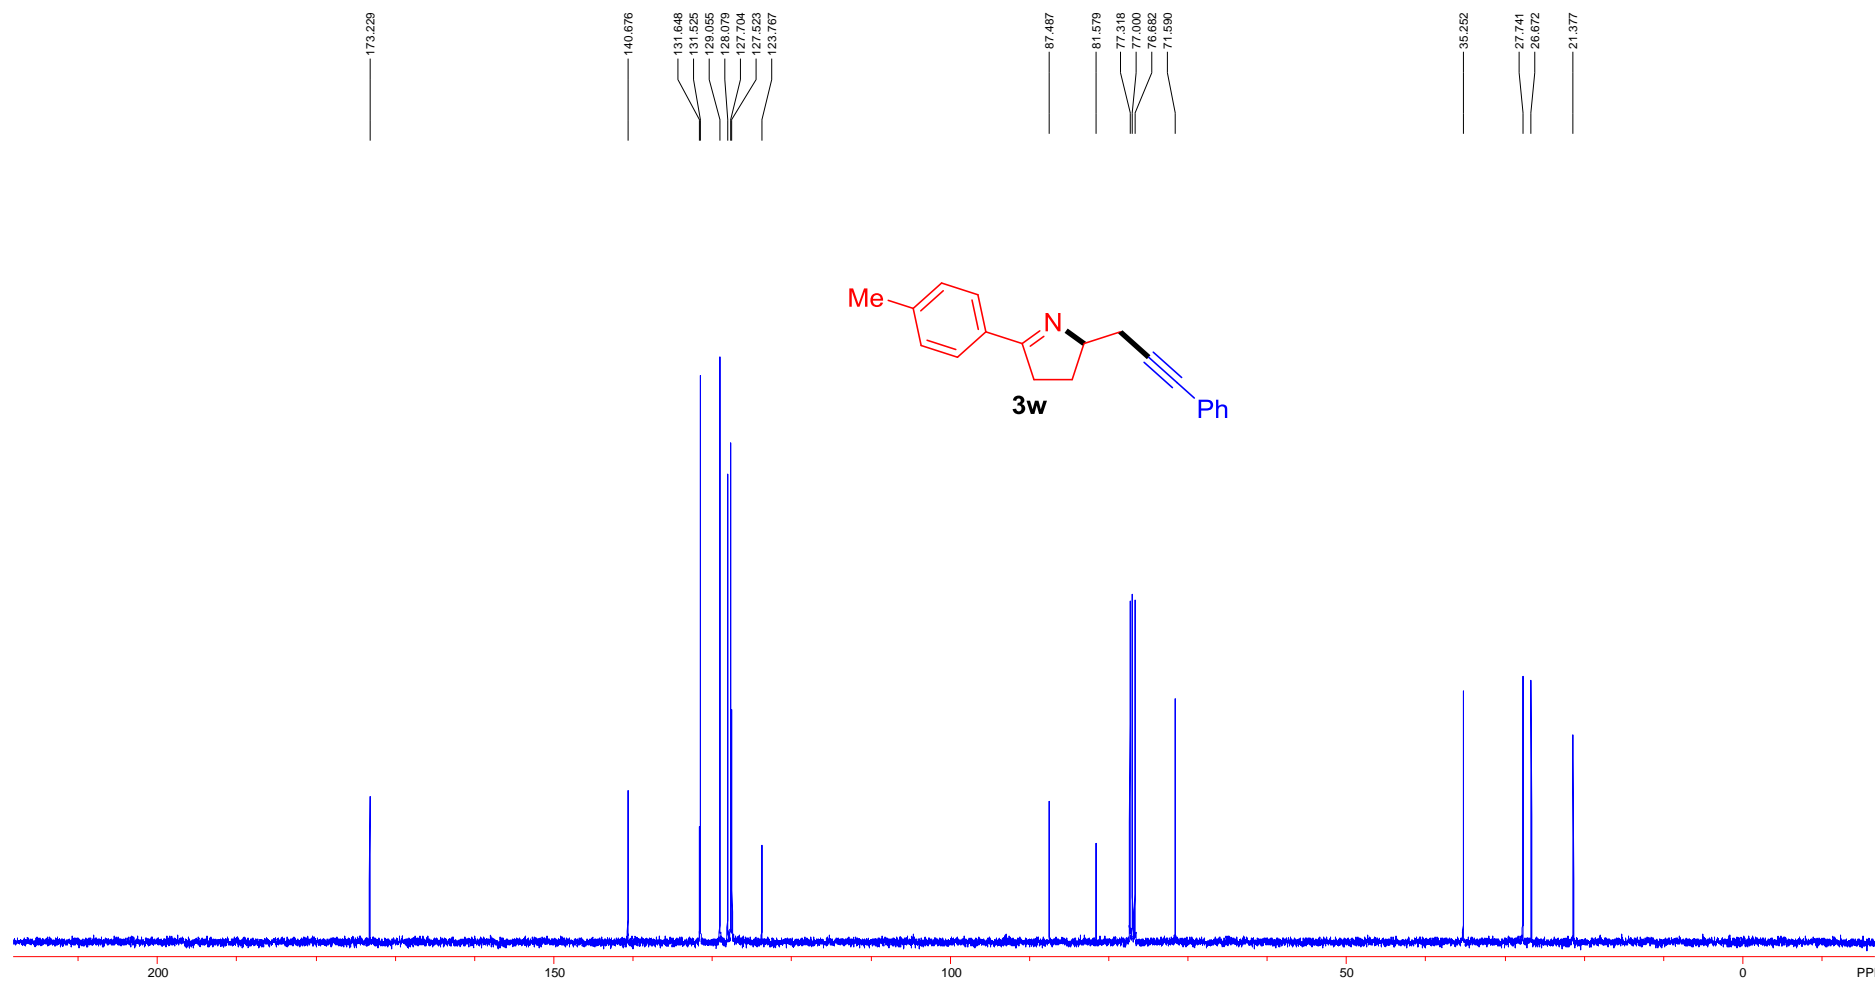

$^1\text{H}$  NMR(400 MHz,  $\text{CDCl}_3$ )

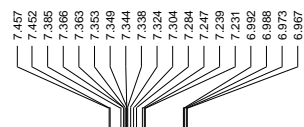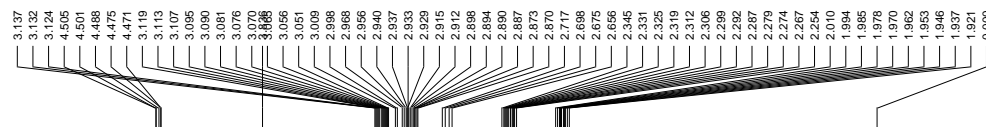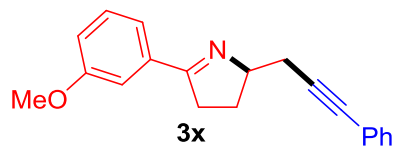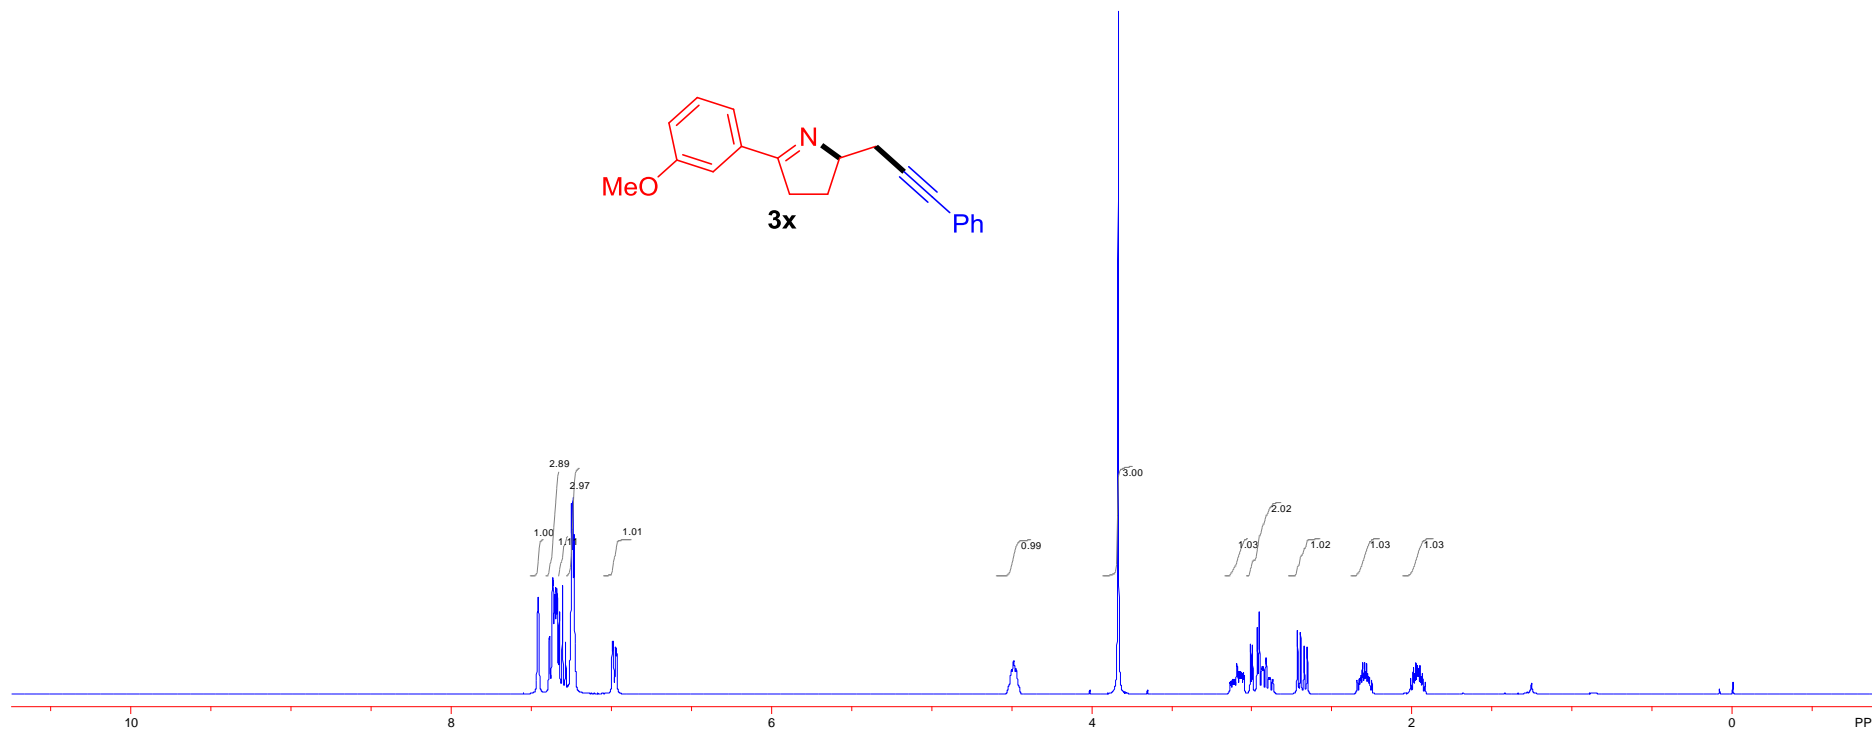



$^{13}\text{C}$  NMR (100 MHz,  $\text{CDCl}_3$ )

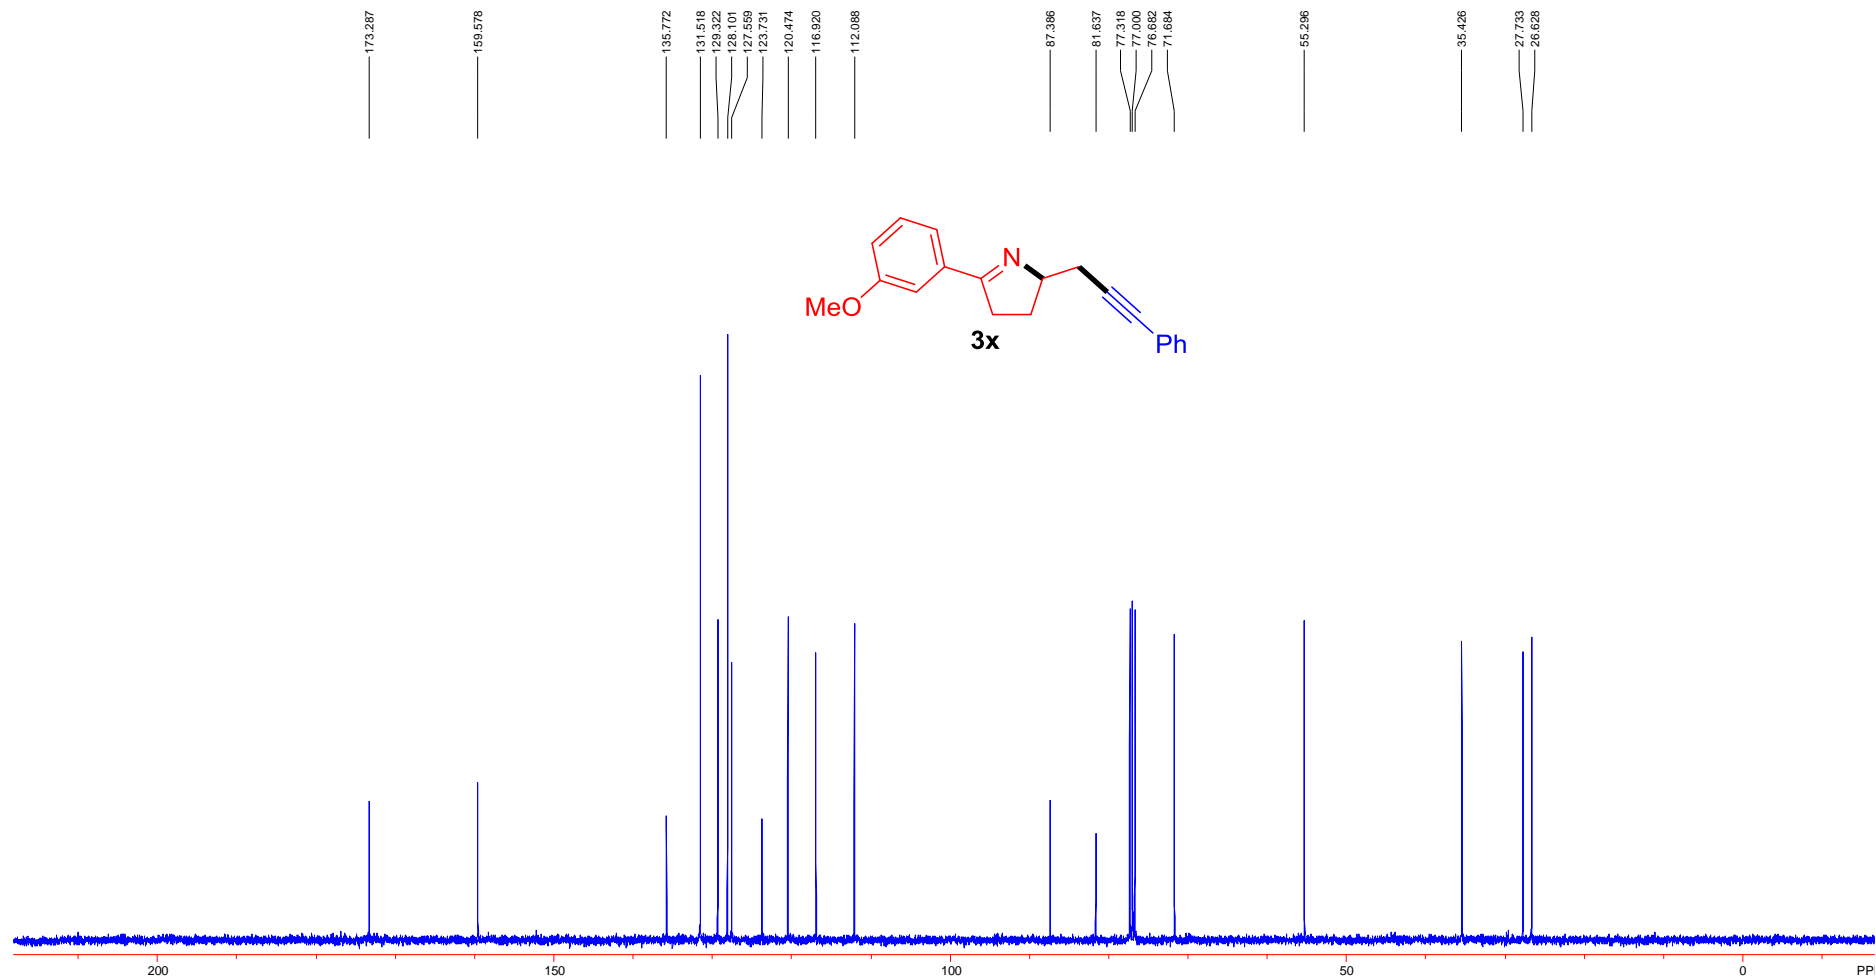

$^1\text{H}$  NMR(400 MHz,  $\text{CDCl}_3$ )

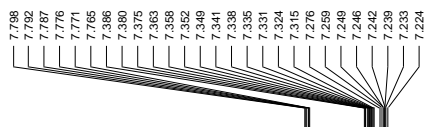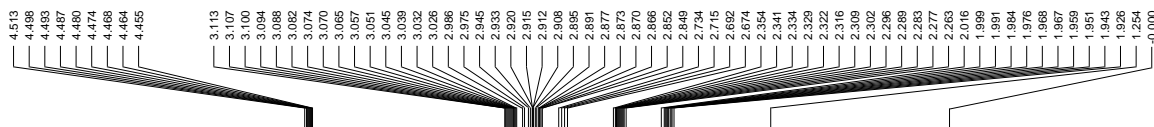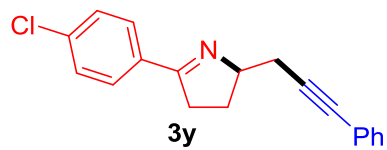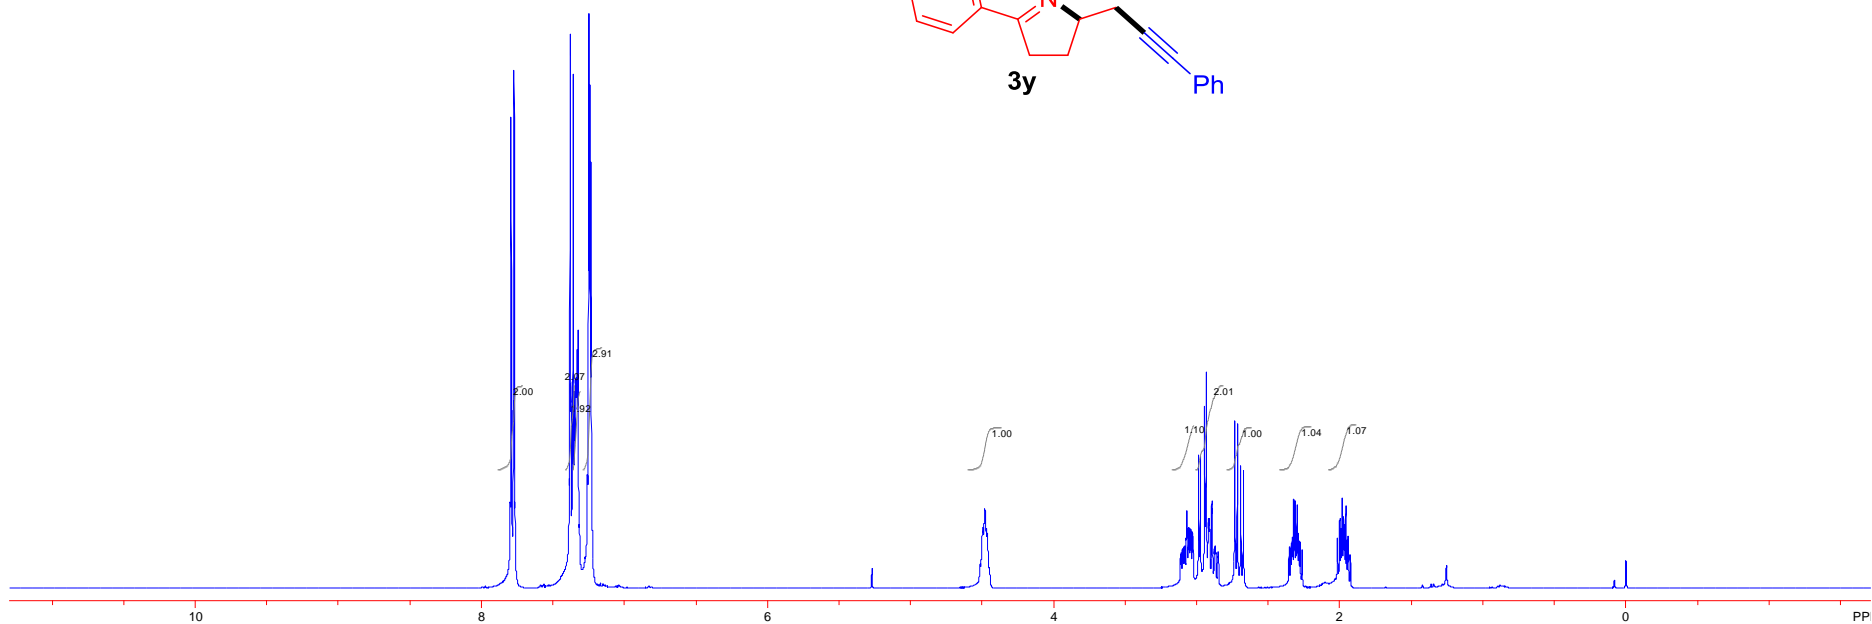

$^{13}\text{C}$  NMR (100 MHz,  $\text{CDCl}_3$ )

172.240

136.516  
132.839  
131.518  
128.055  
128.607  
125.130  
127.617  
123.661

87.206

81.724

77.318  
77.000  
76.682  
71.778

35.325

27.777  
26.614

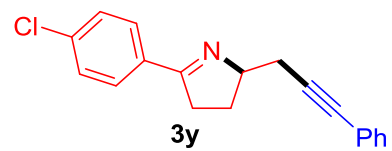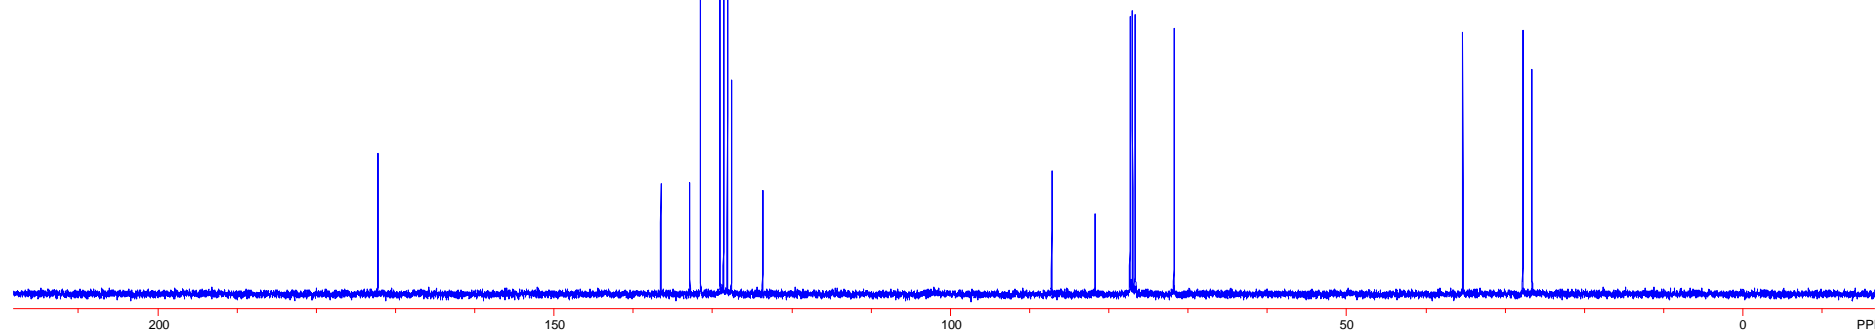

$^1\text{H NMR}$ (400 MHz,  $\text{CDCl}_3$ )

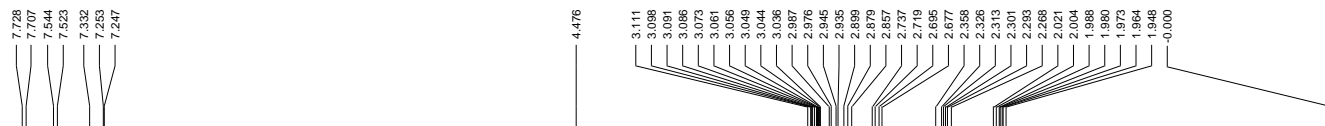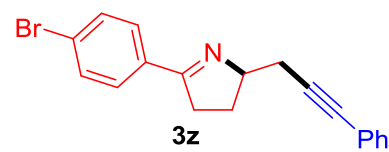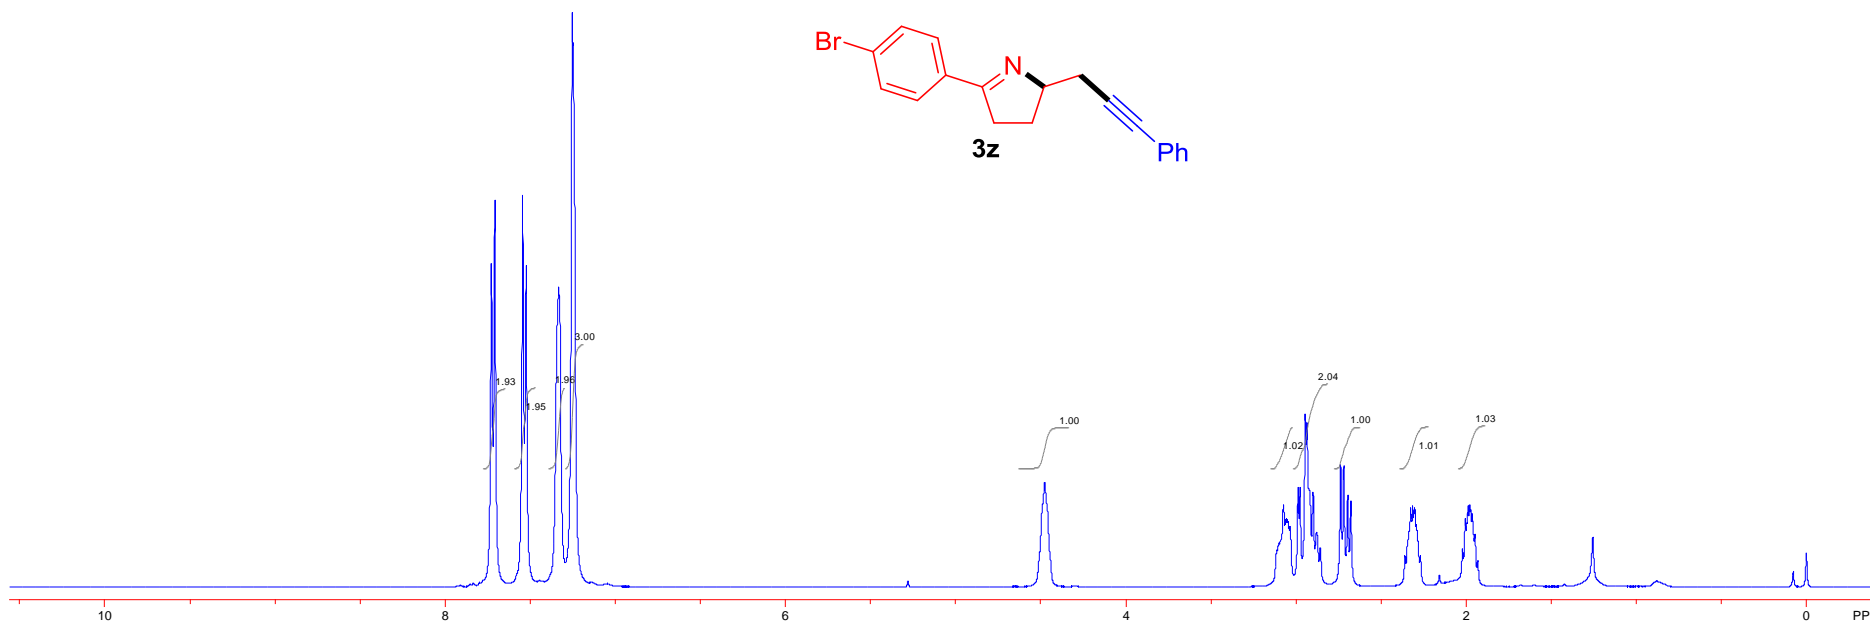

$^{13}\text{C}$  NMR (100 MHz,  $\text{CDCl}_3$ )

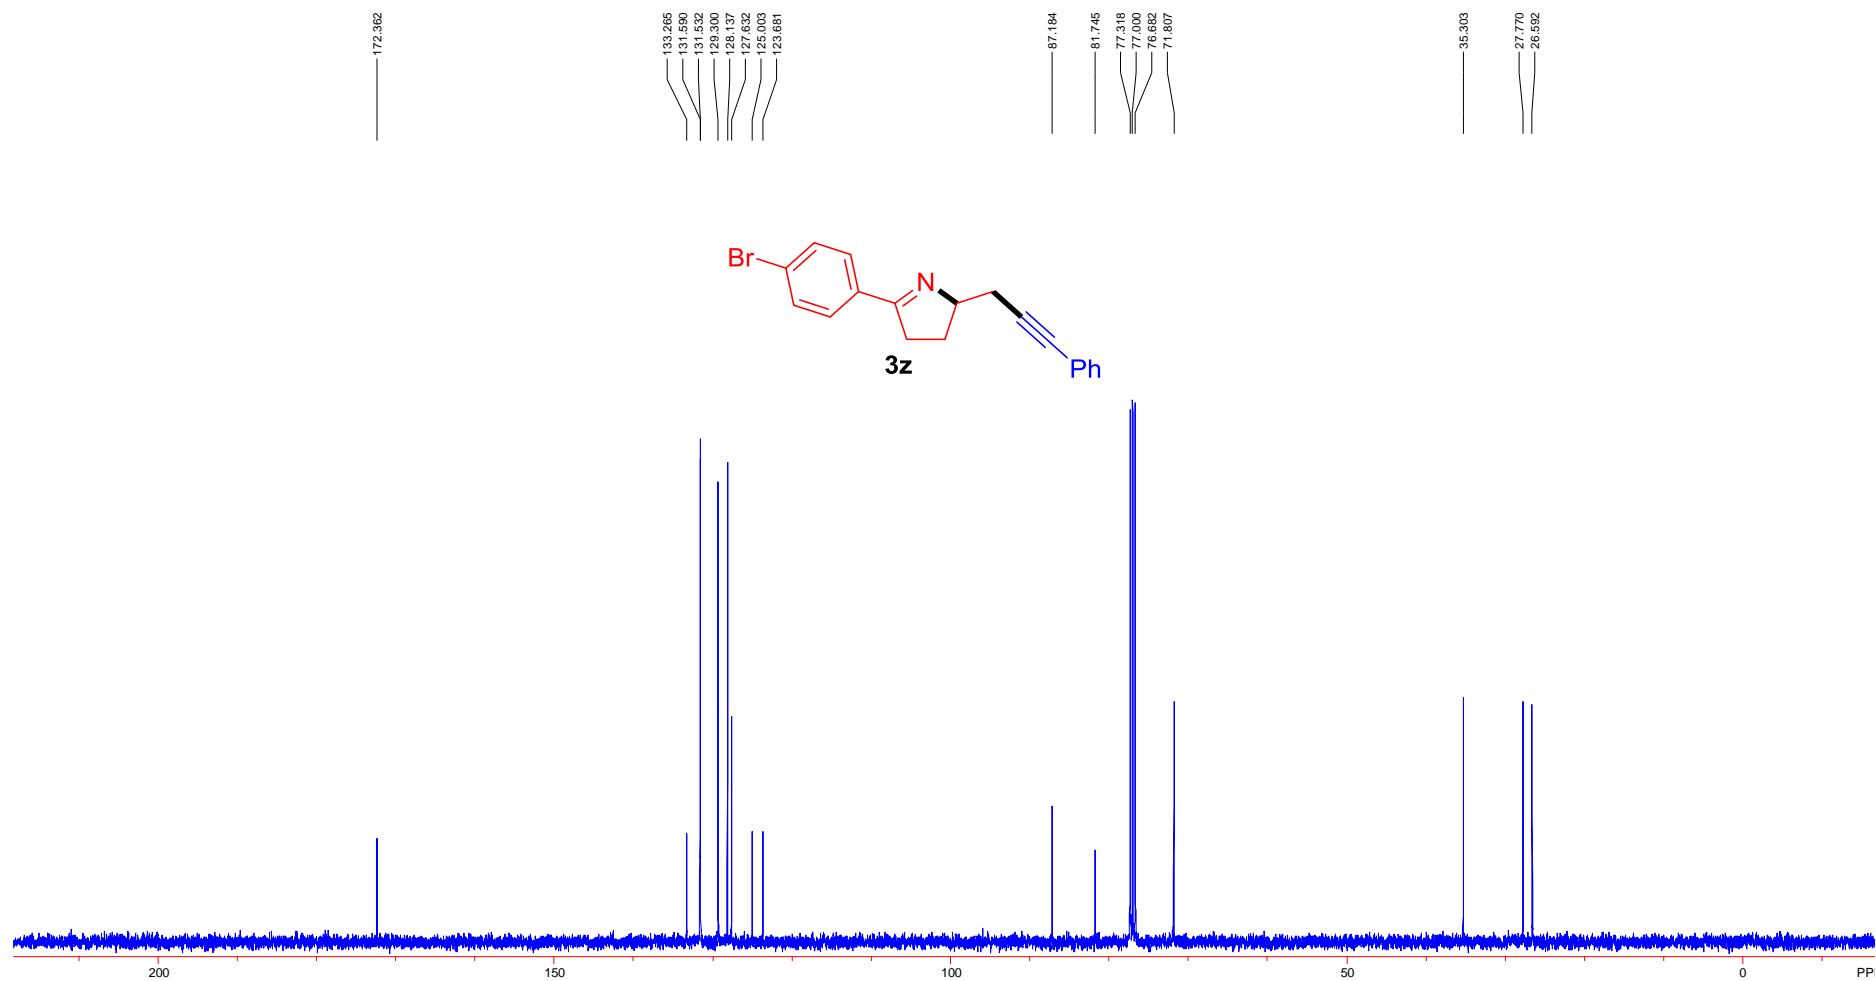

$^1\text{H}$  NMR(400 MHz,  $\text{CDCl}_3$ )

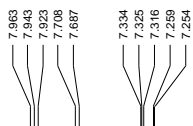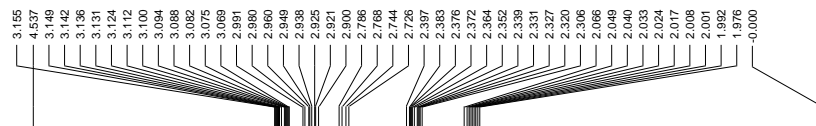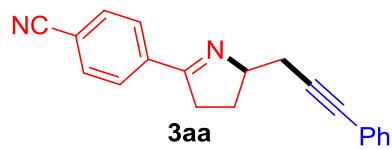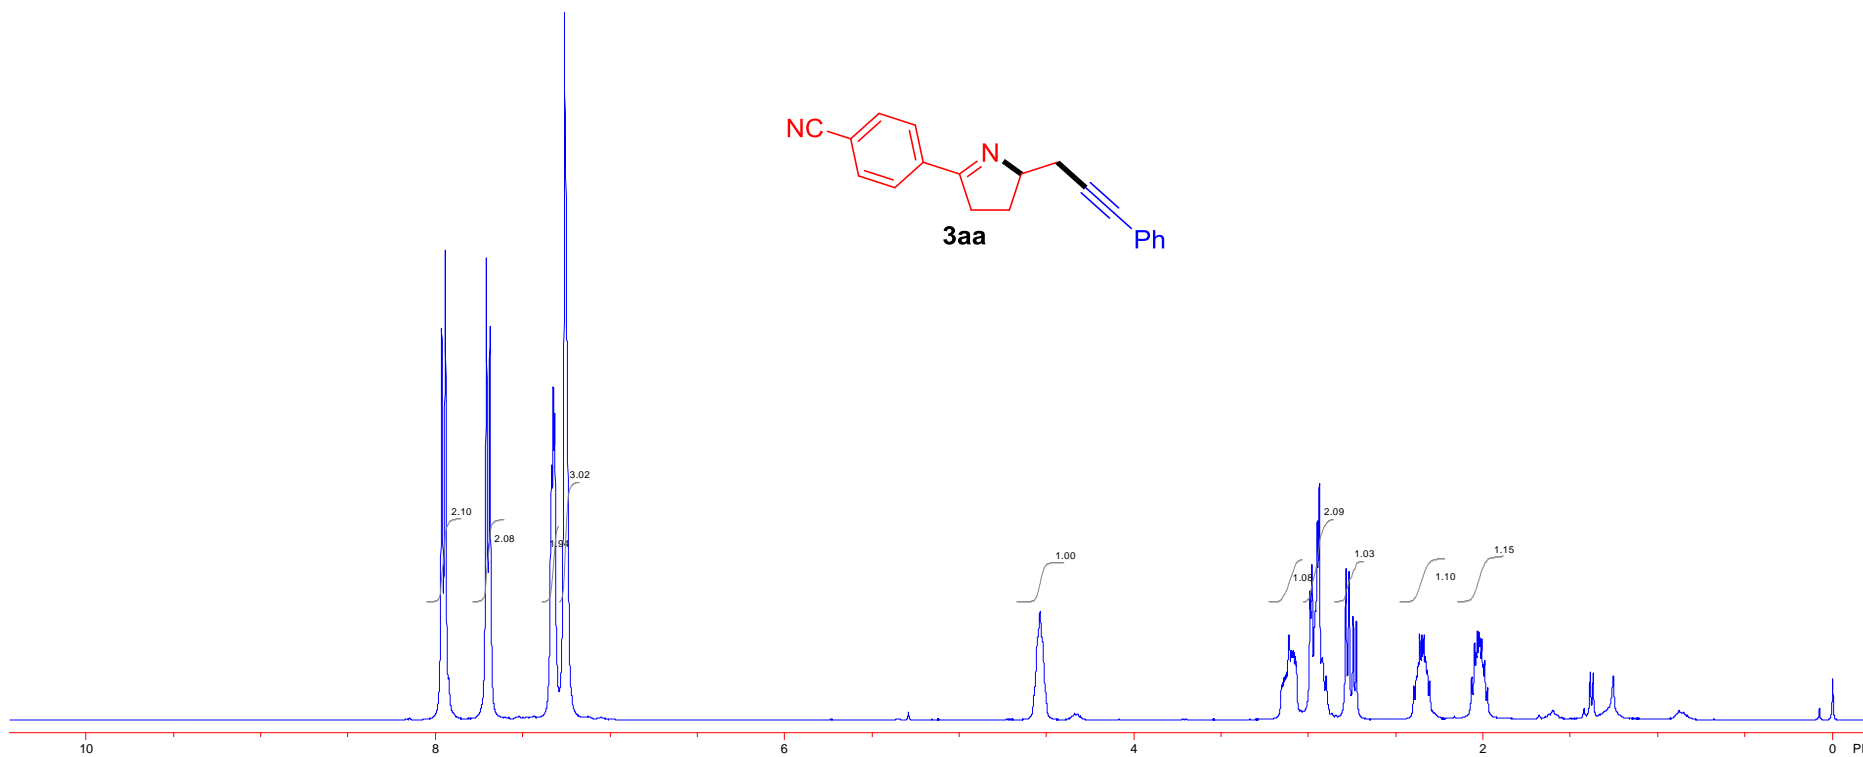

$^{13}\text{C}$  NMR (100 MHz,  $\text{CDCl}_3$ )

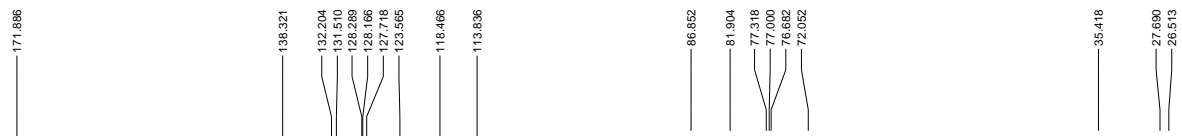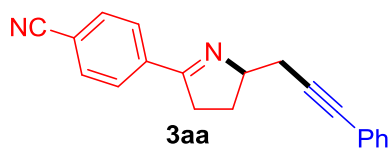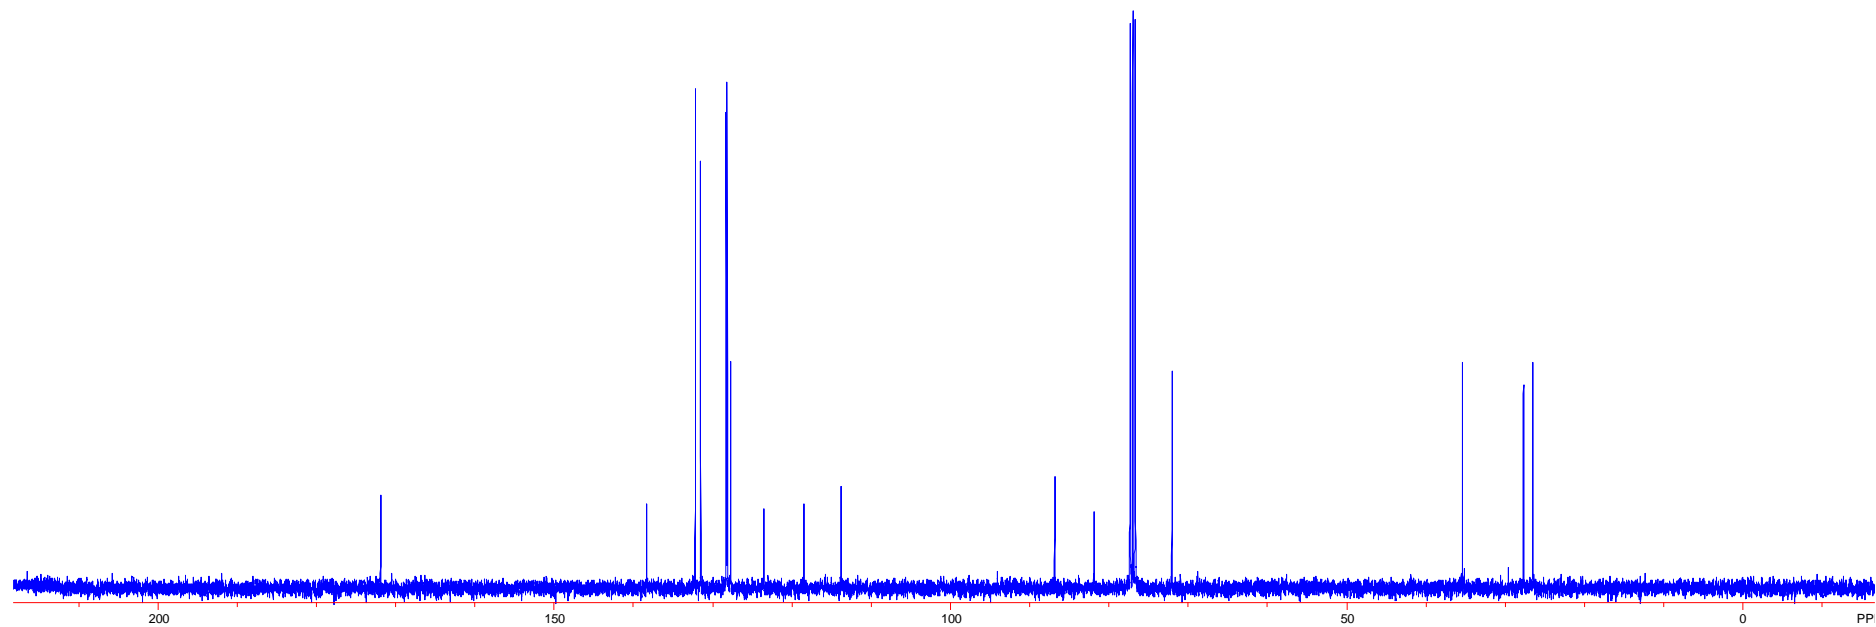

$^1\text{H}$  NMR(400 MHz,  $\text{CDCl}_3$ )

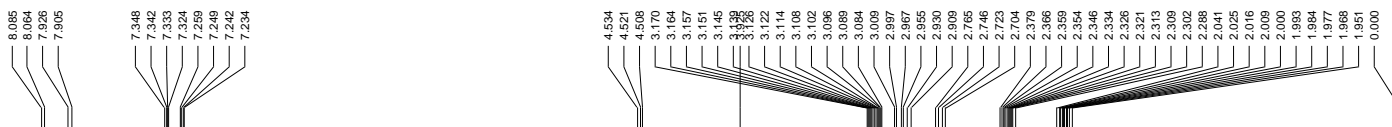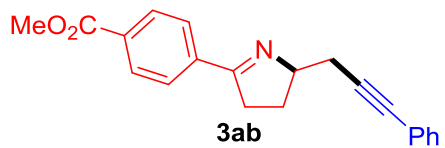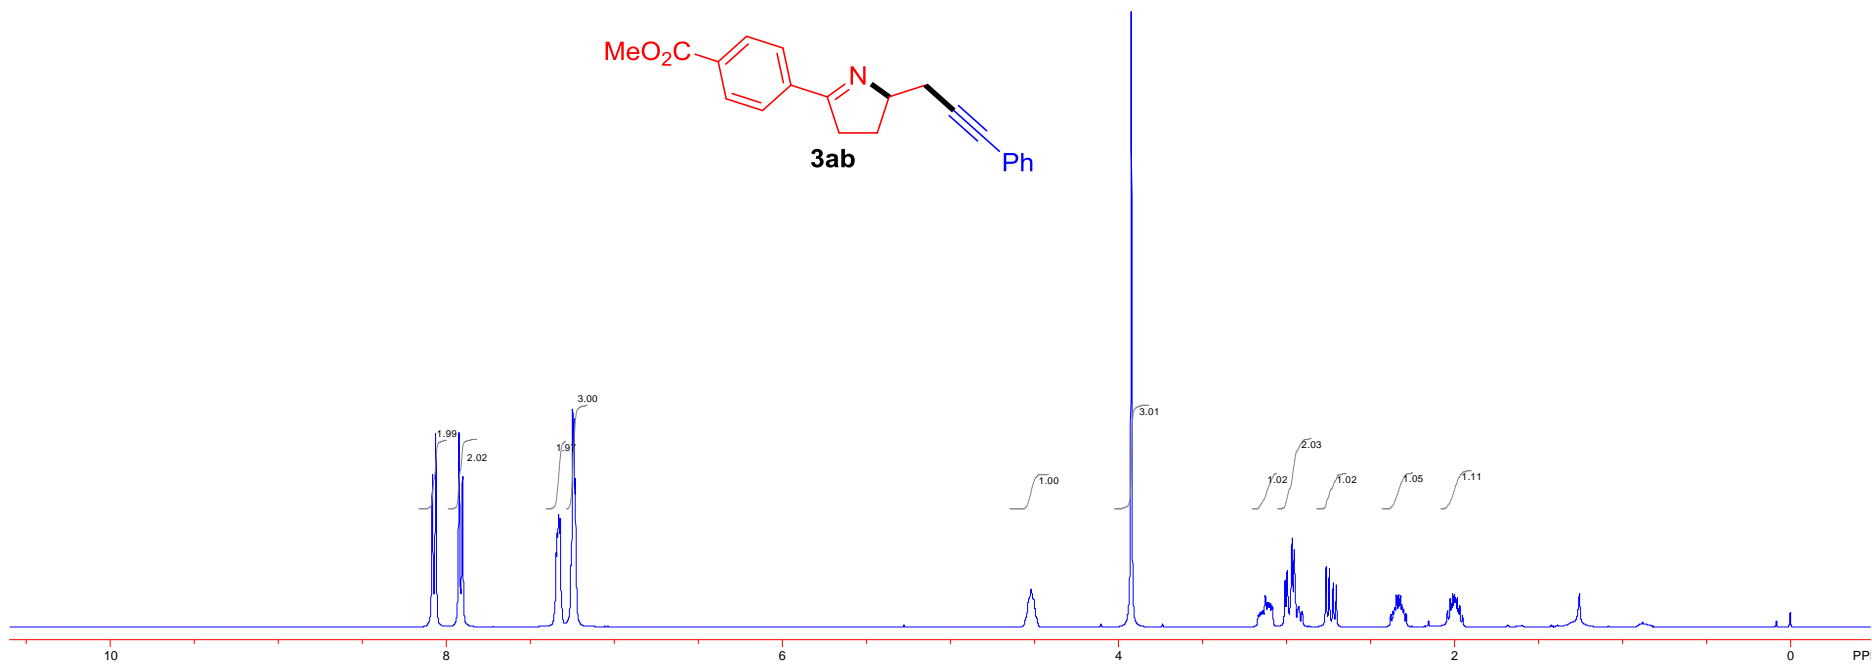



$^{13}\text{C}$  NMR (100 MHz,  $\text{CDCl}_3$ )

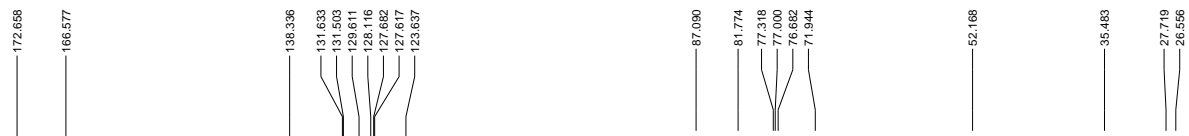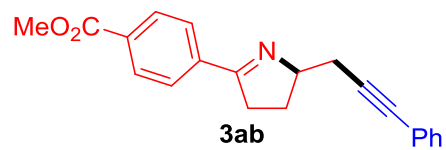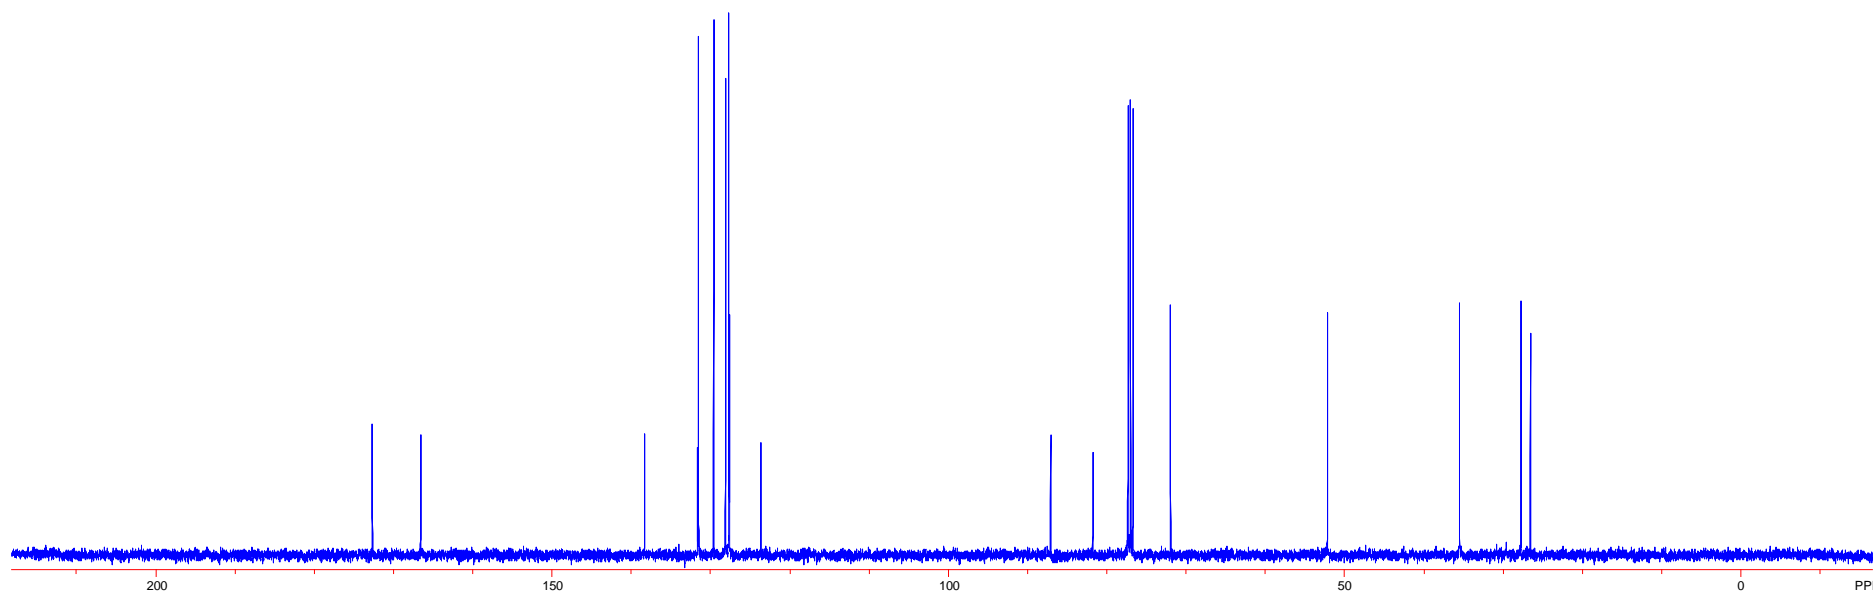

$^1\text{H}$  NMR(400 MHz,  $\text{CDCl}_3$ )

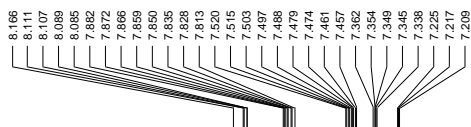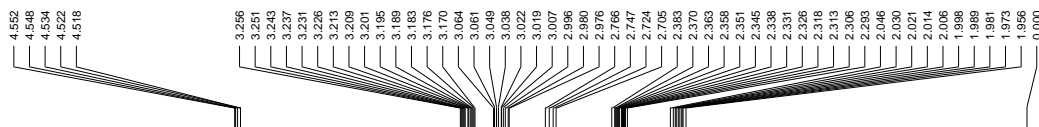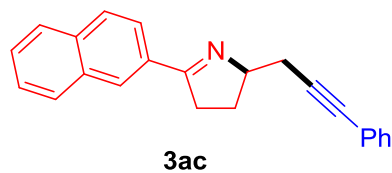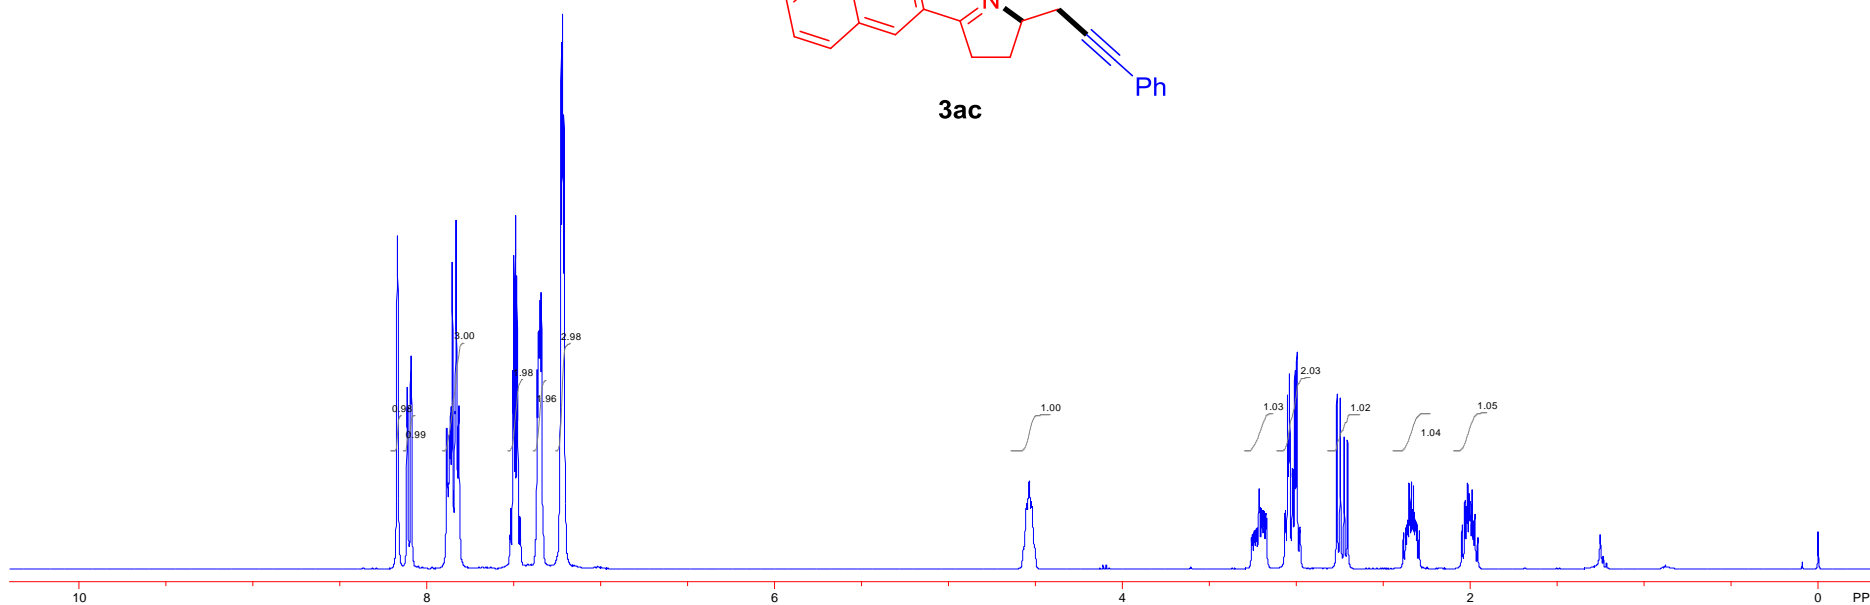

$^{13}\text{C}$  NMR (100 MHz,  $\text{CDCl}_3$ )

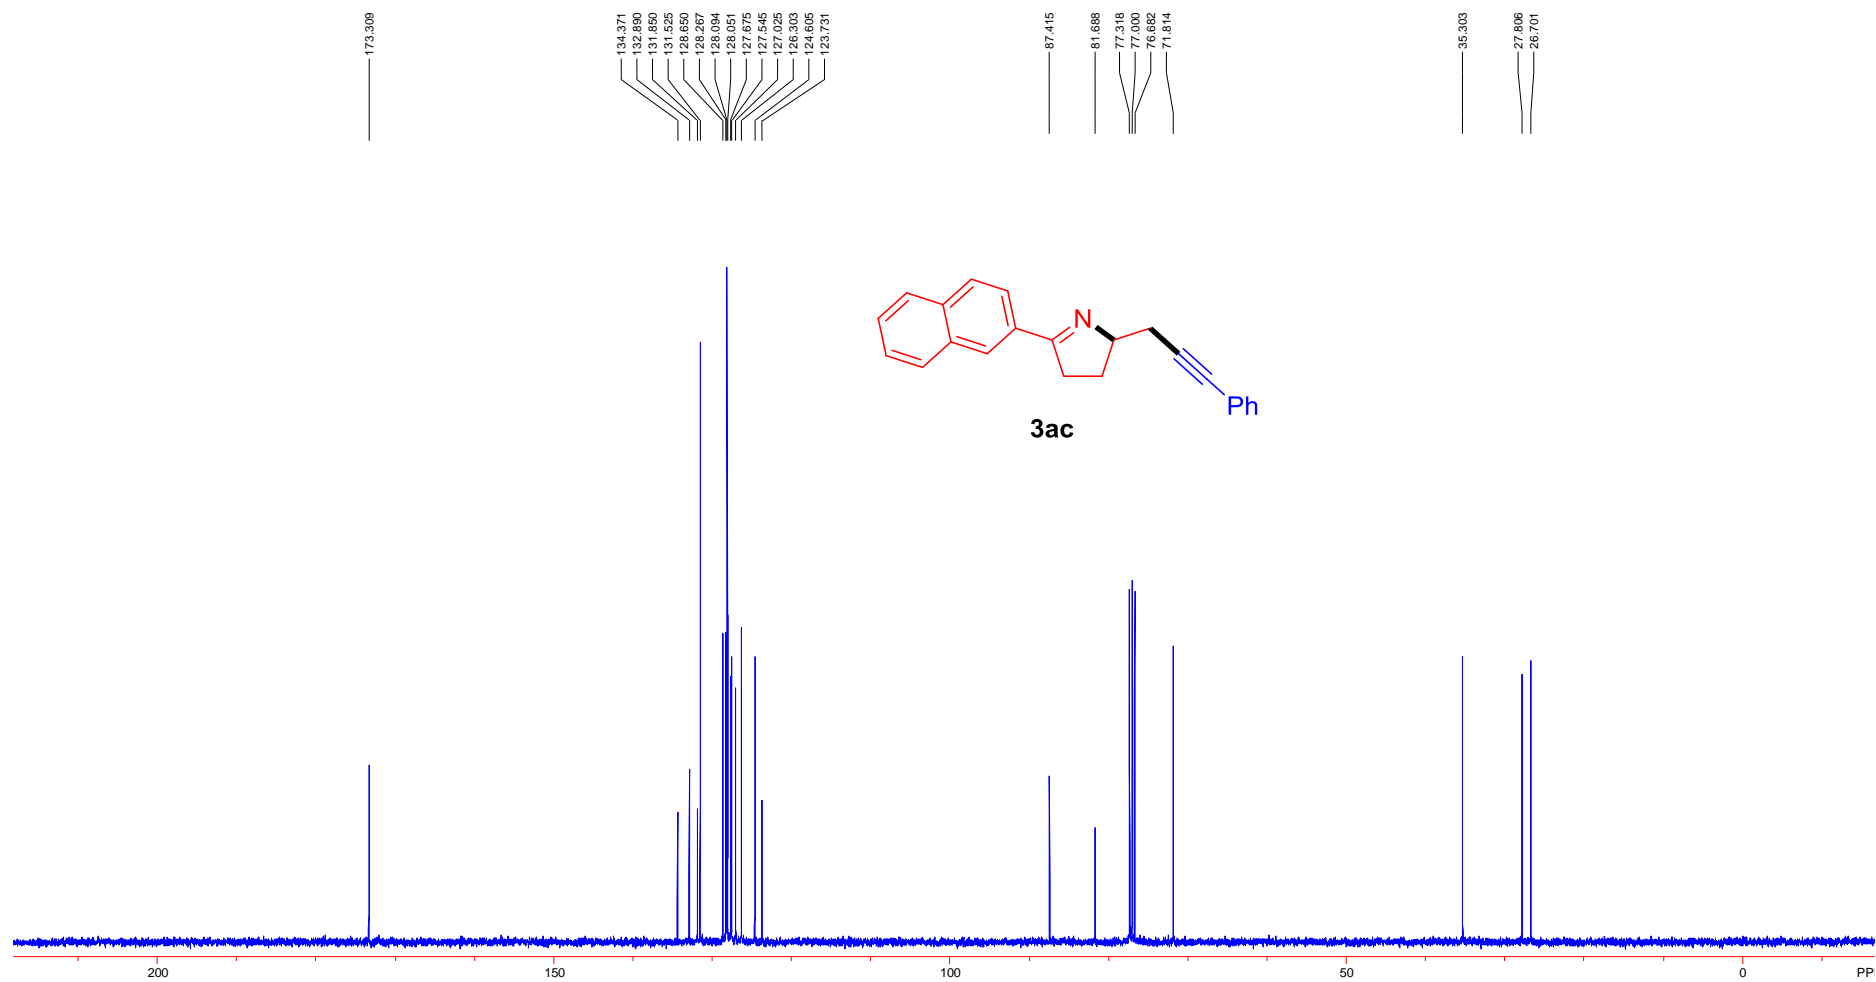

$^1\text{H}$  NMR(400 MHz,  $\text{CDCl}_3$ )

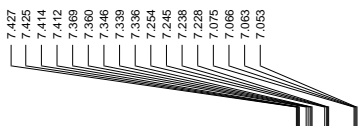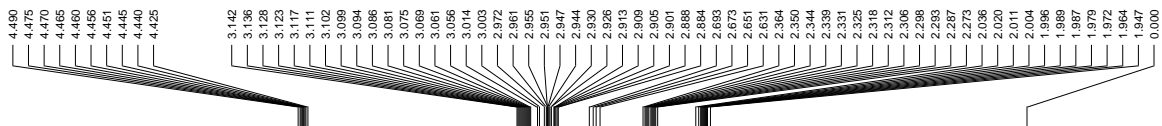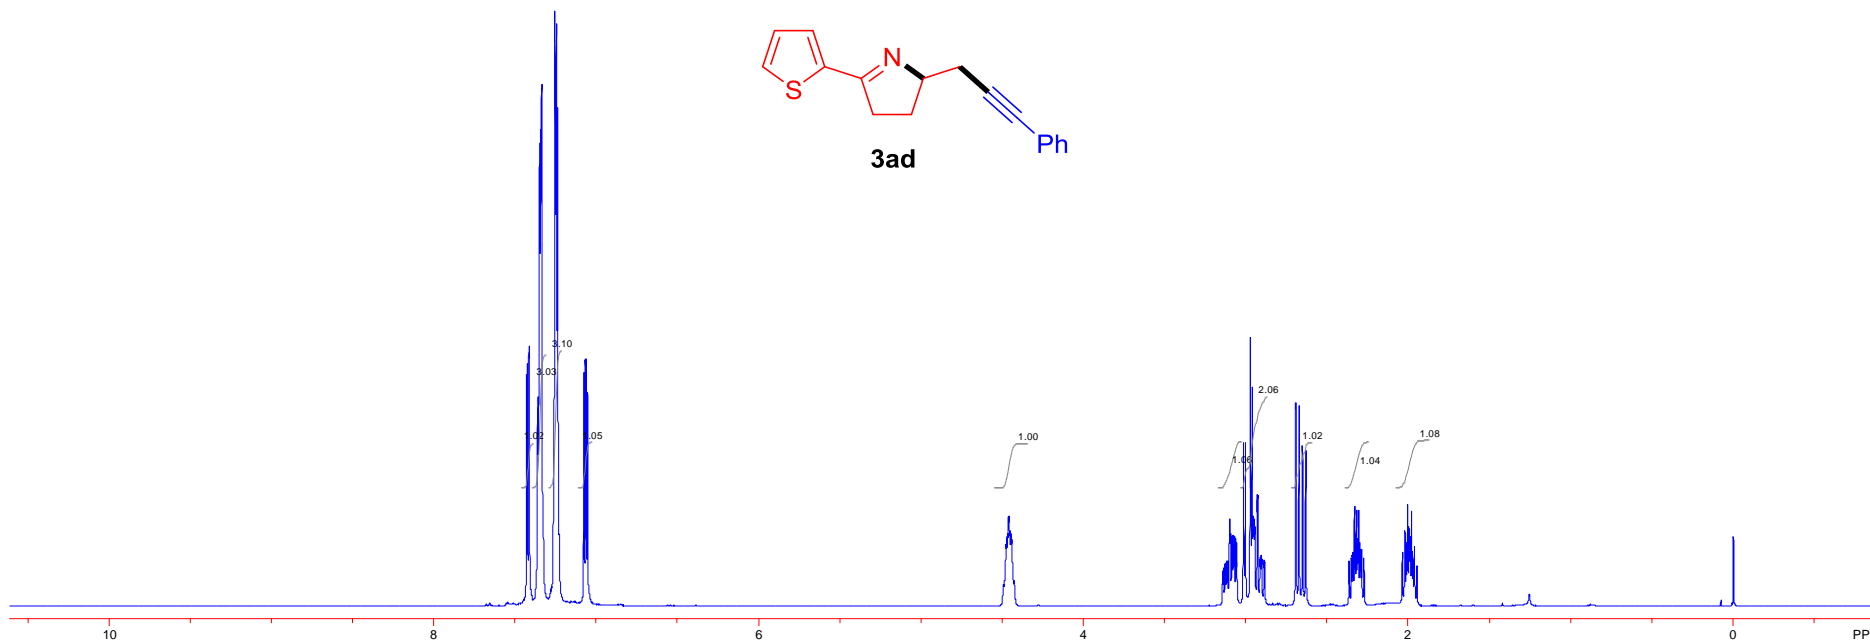

$^{13}\text{C}$  NMR (100 MHz,  $\text{CDCl}_3$ )

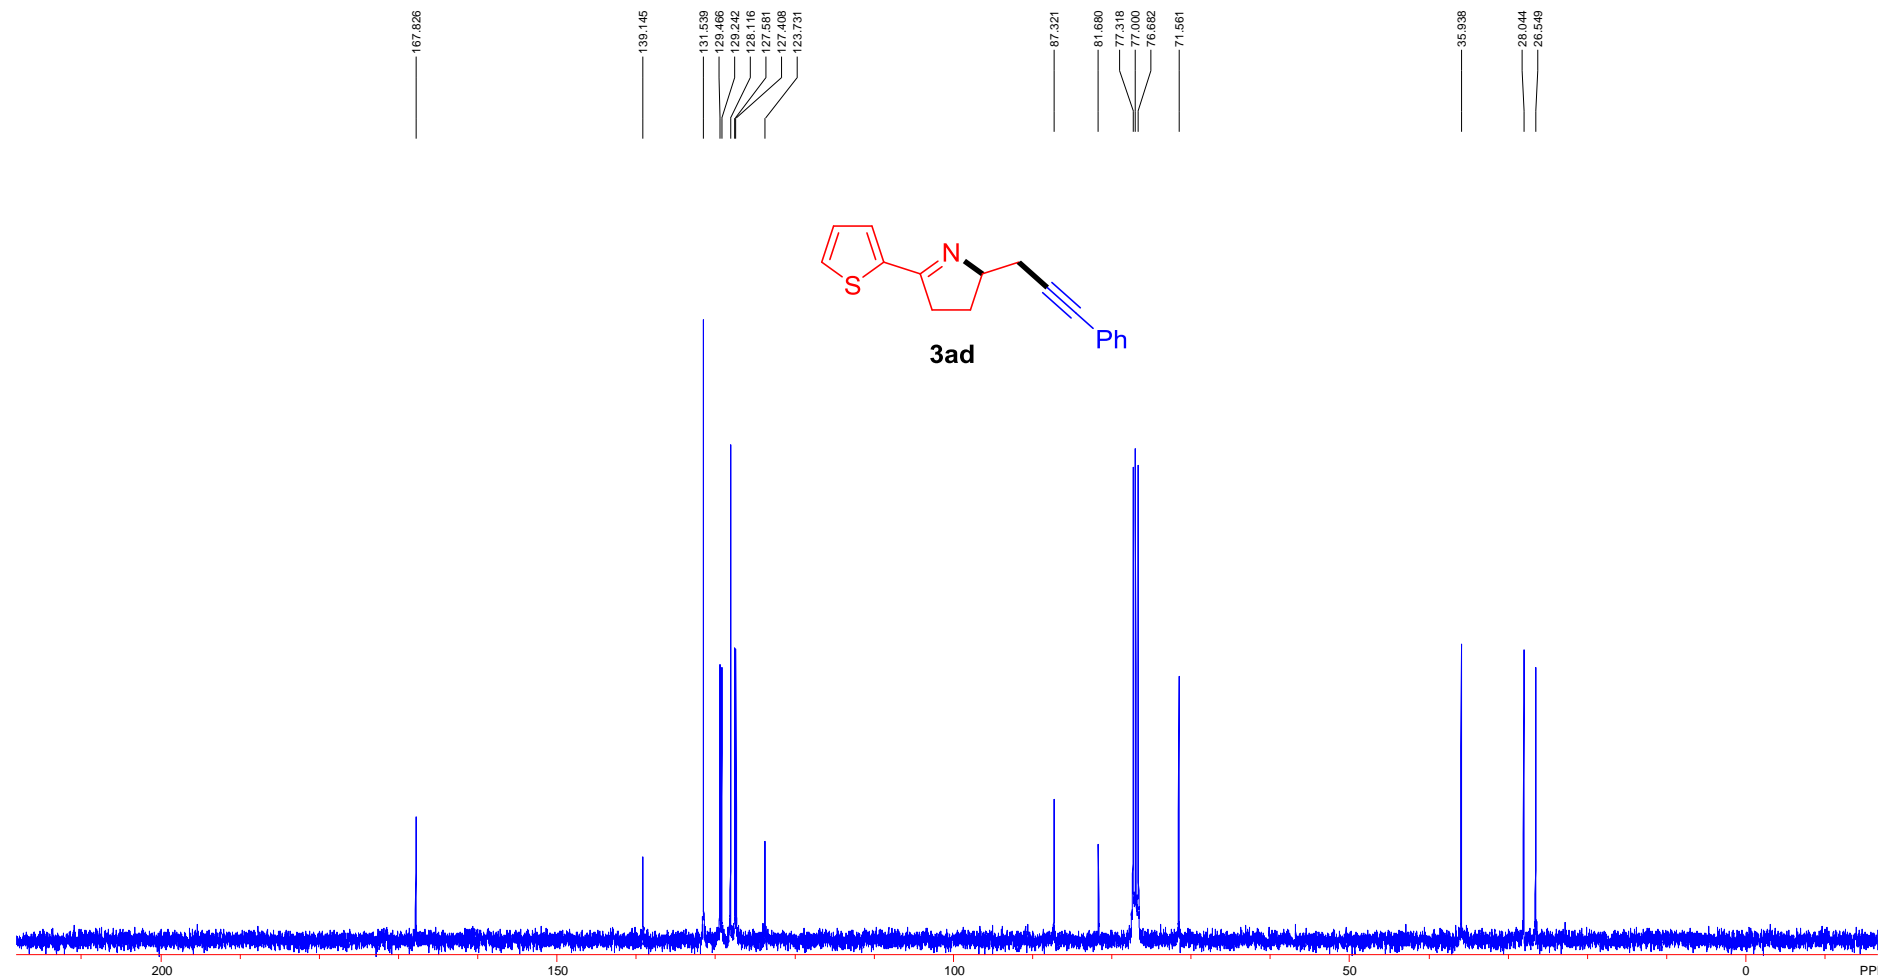

$^1\text{H}$  NMR(400 MHz,  $\text{CDCl}_3$ )

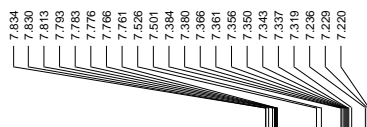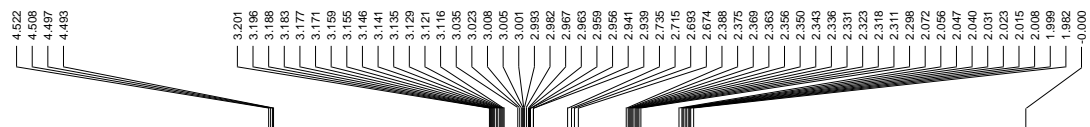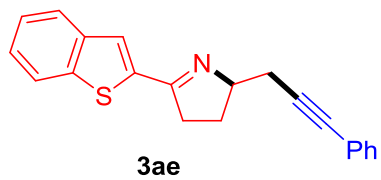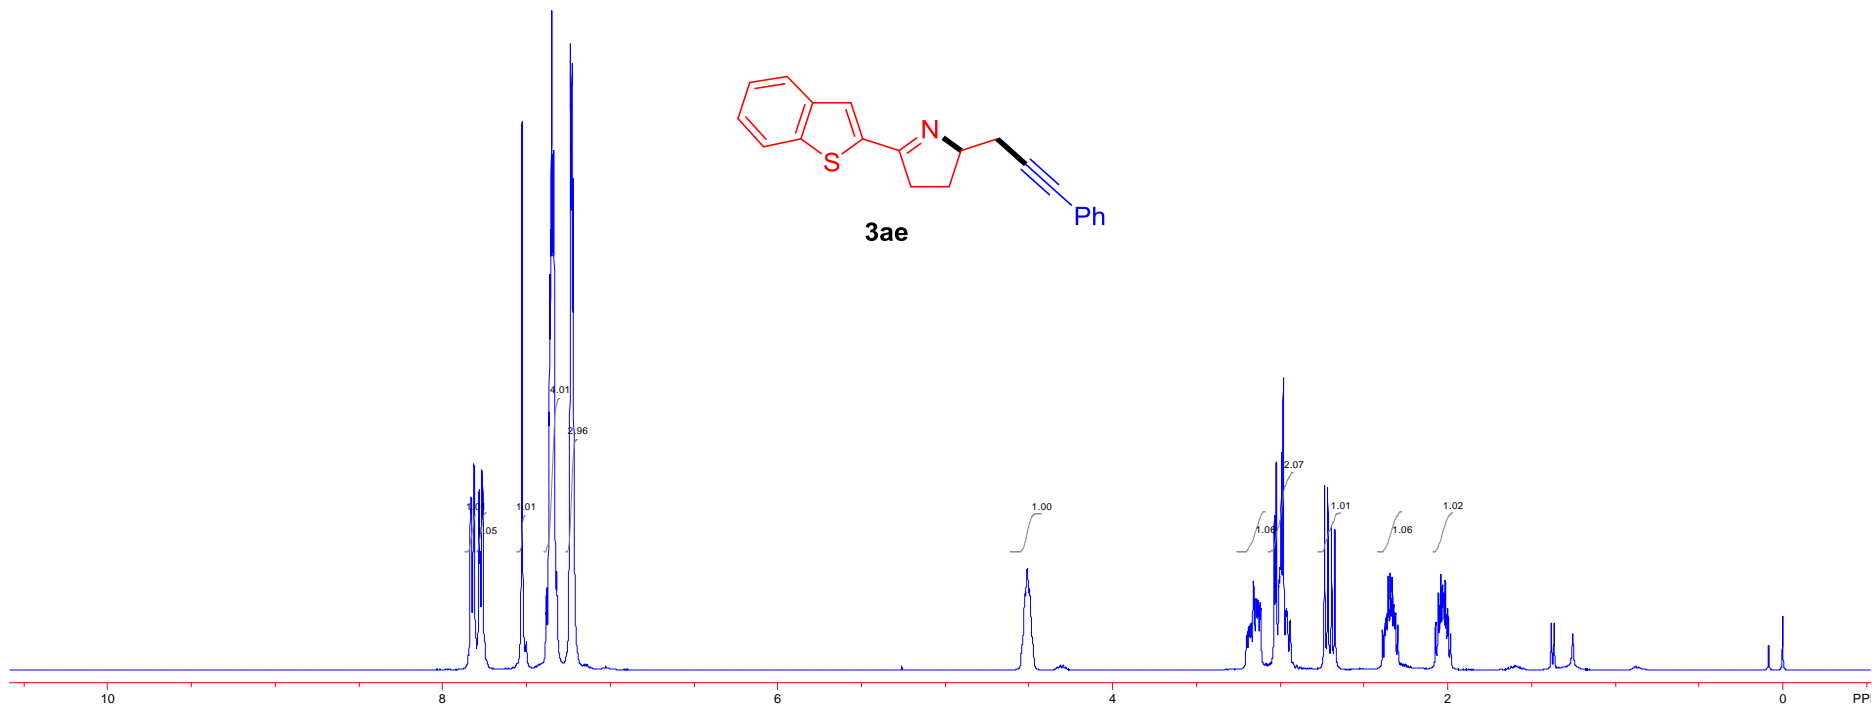

$^{13}\text{C}$  NMR (100 MHz,  $\text{CDCl}_3$ )

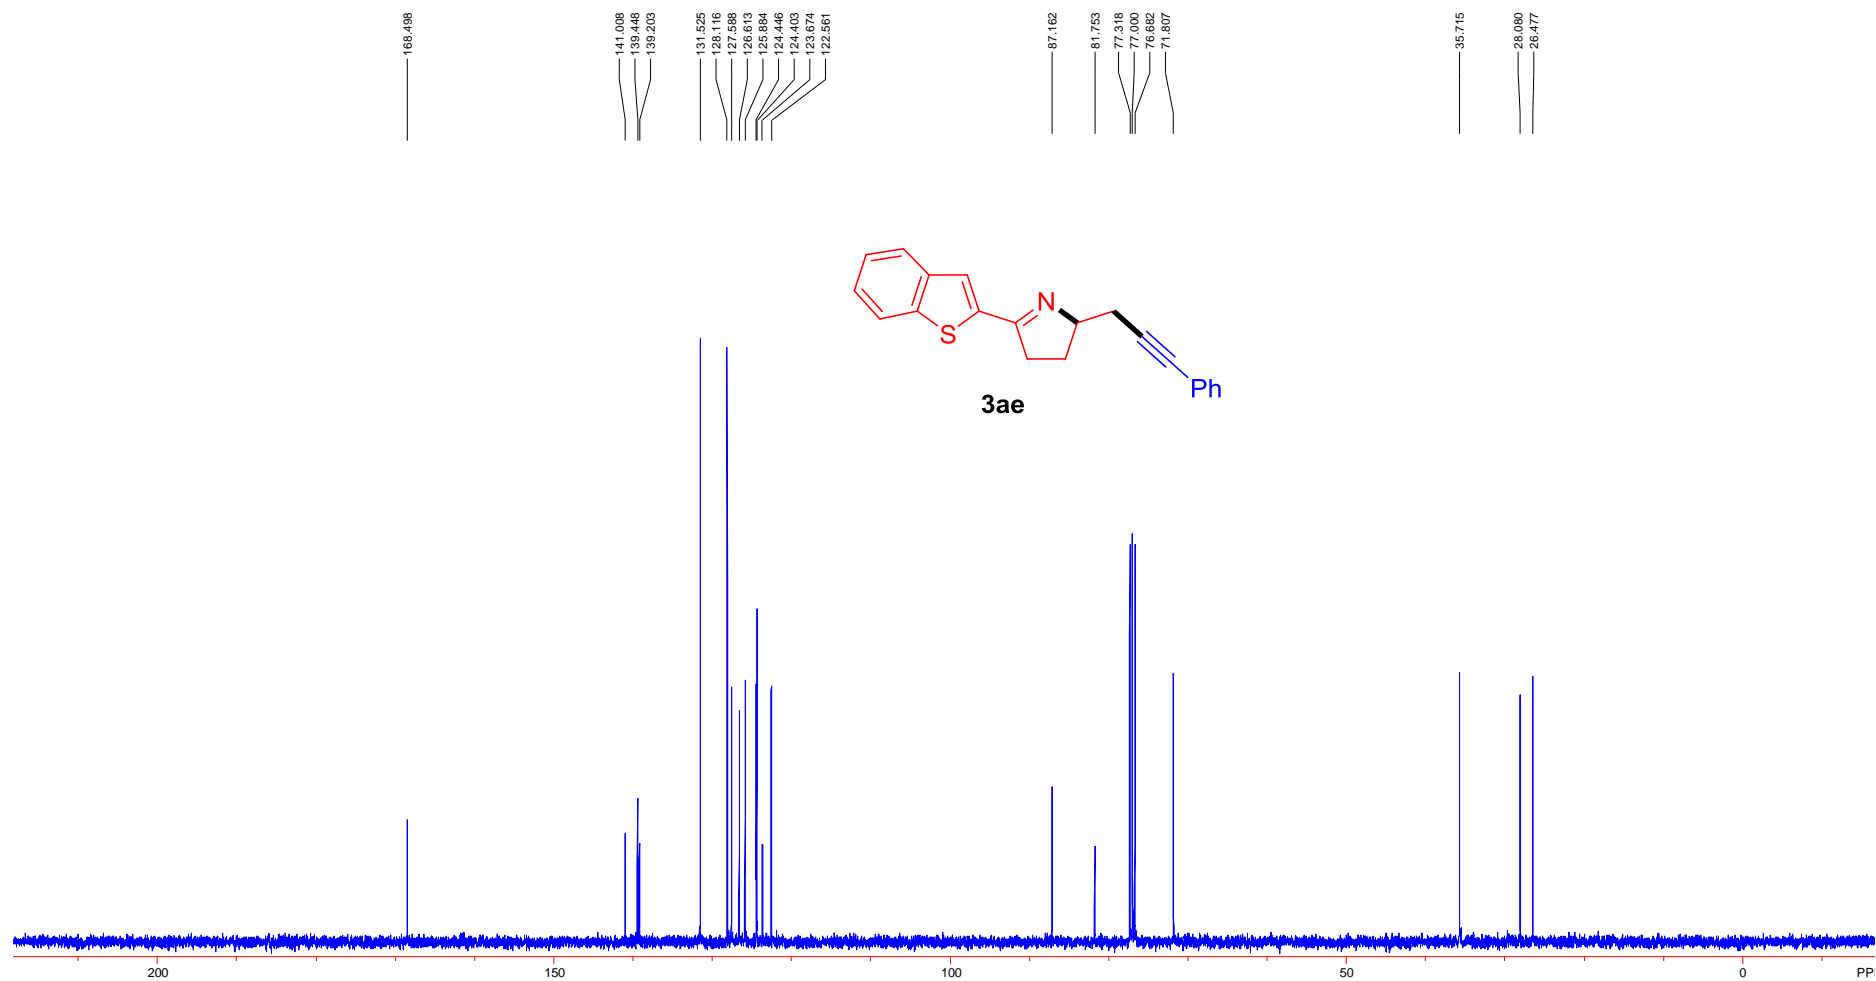

$^1\text{H}$  NMR(400 MHz,  $\text{CDCl}_3$ )

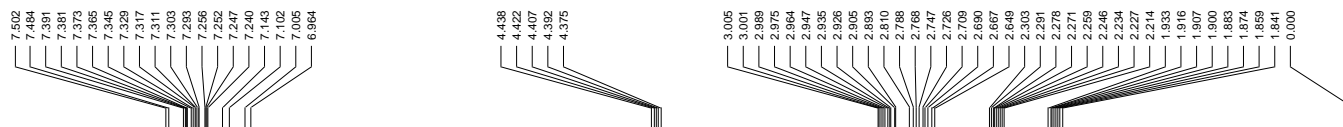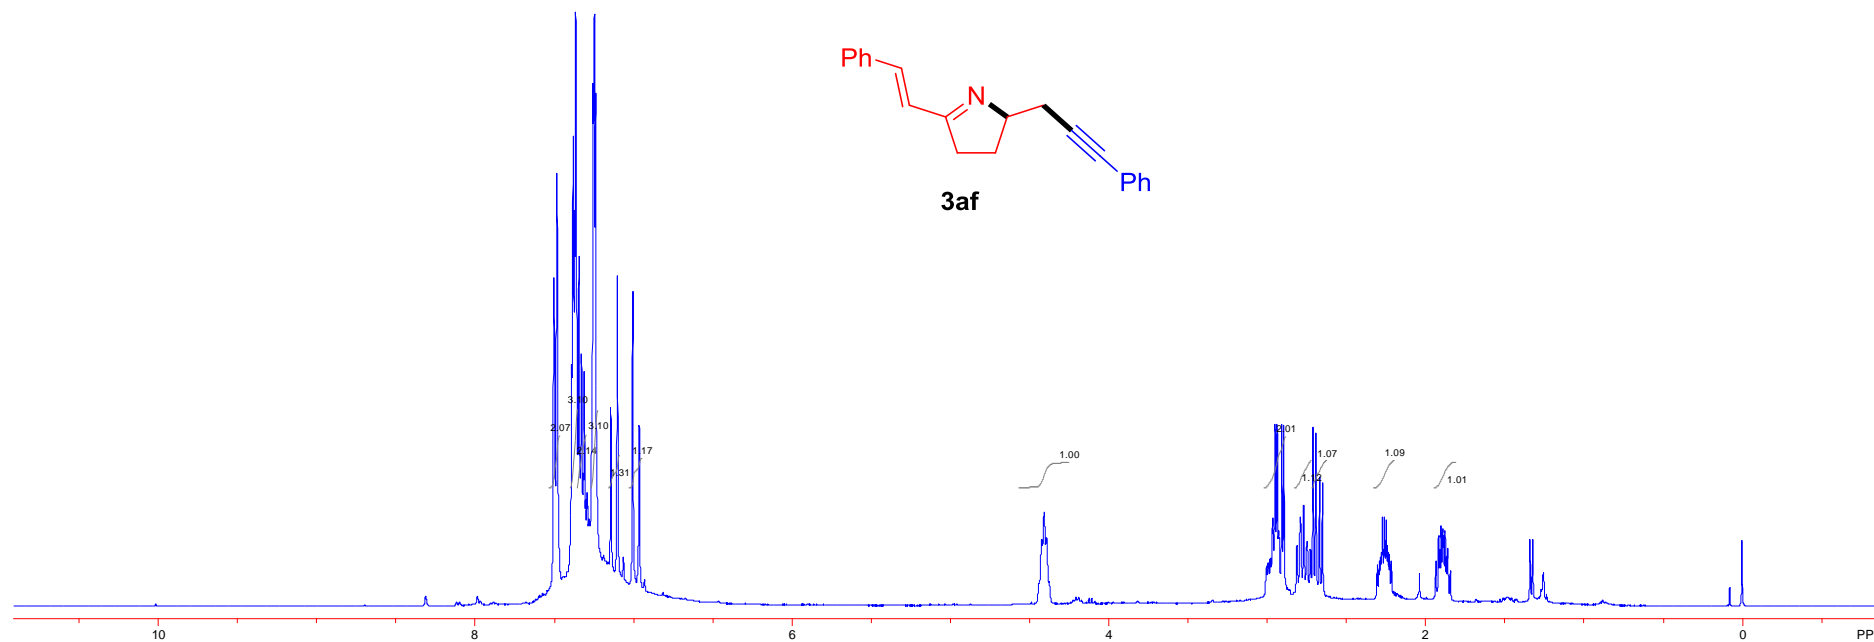



$^{13}\text{C}$  NMR (151 MHz,  $\text{CDCl}_3$ )

173.981

139.250

135.859

131.616

129.085

128.816

128.145

127.620

127.248

124.769

123.777

87.303

81.718

77.211

77.000

76.789

71.385

34.029

27.605

26.628

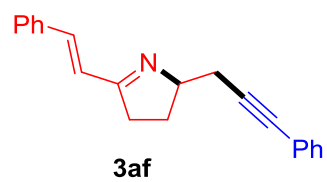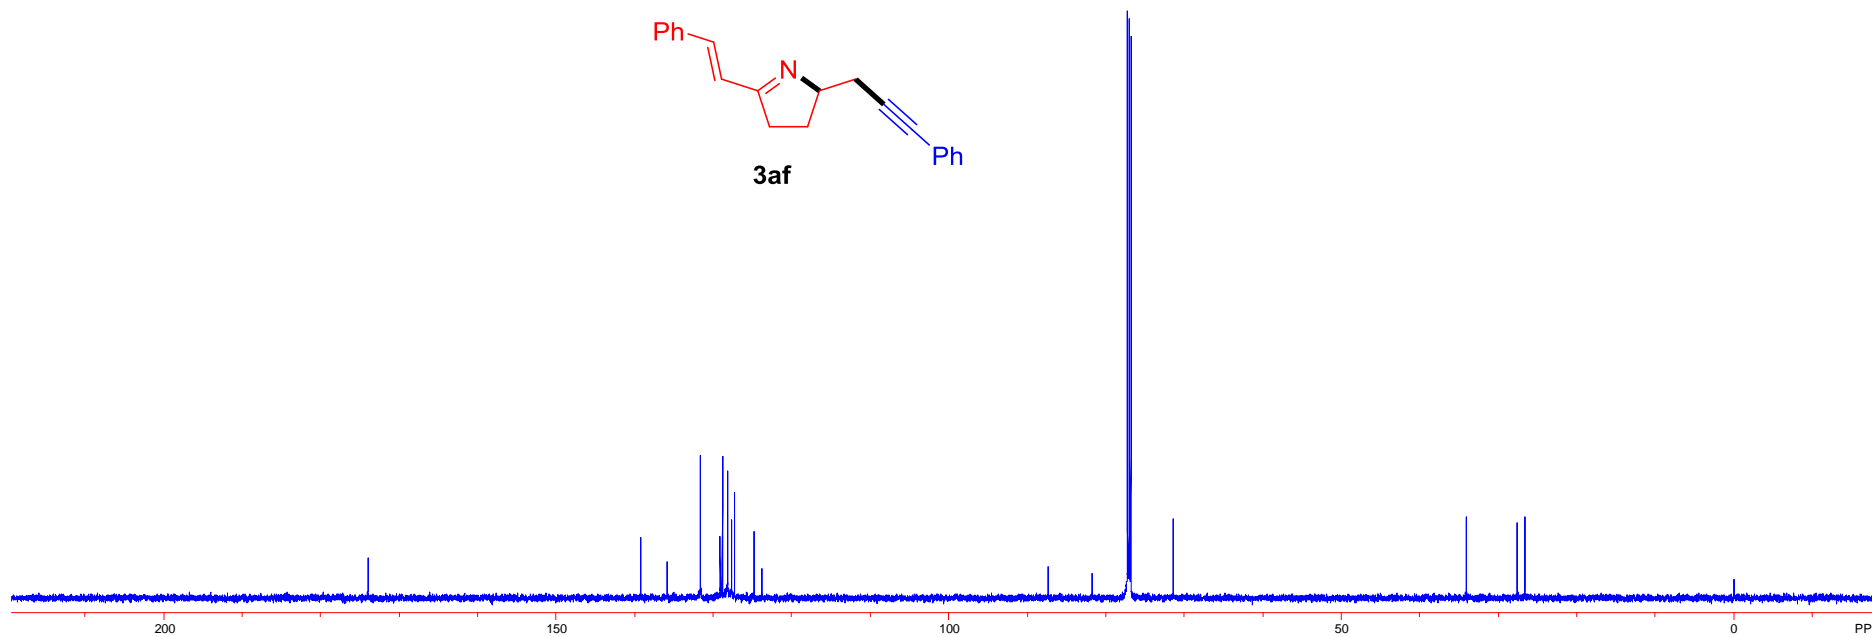

$^1\text{H}$  NMR(600 MHz,  $\text{CDCl}_3$ )

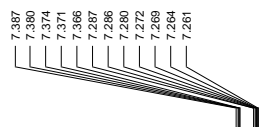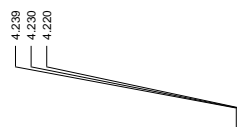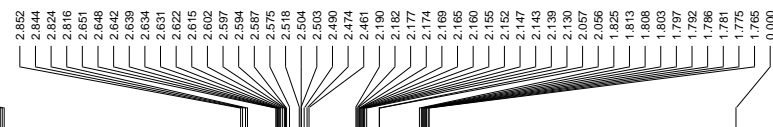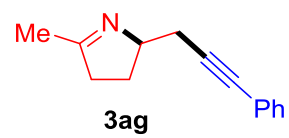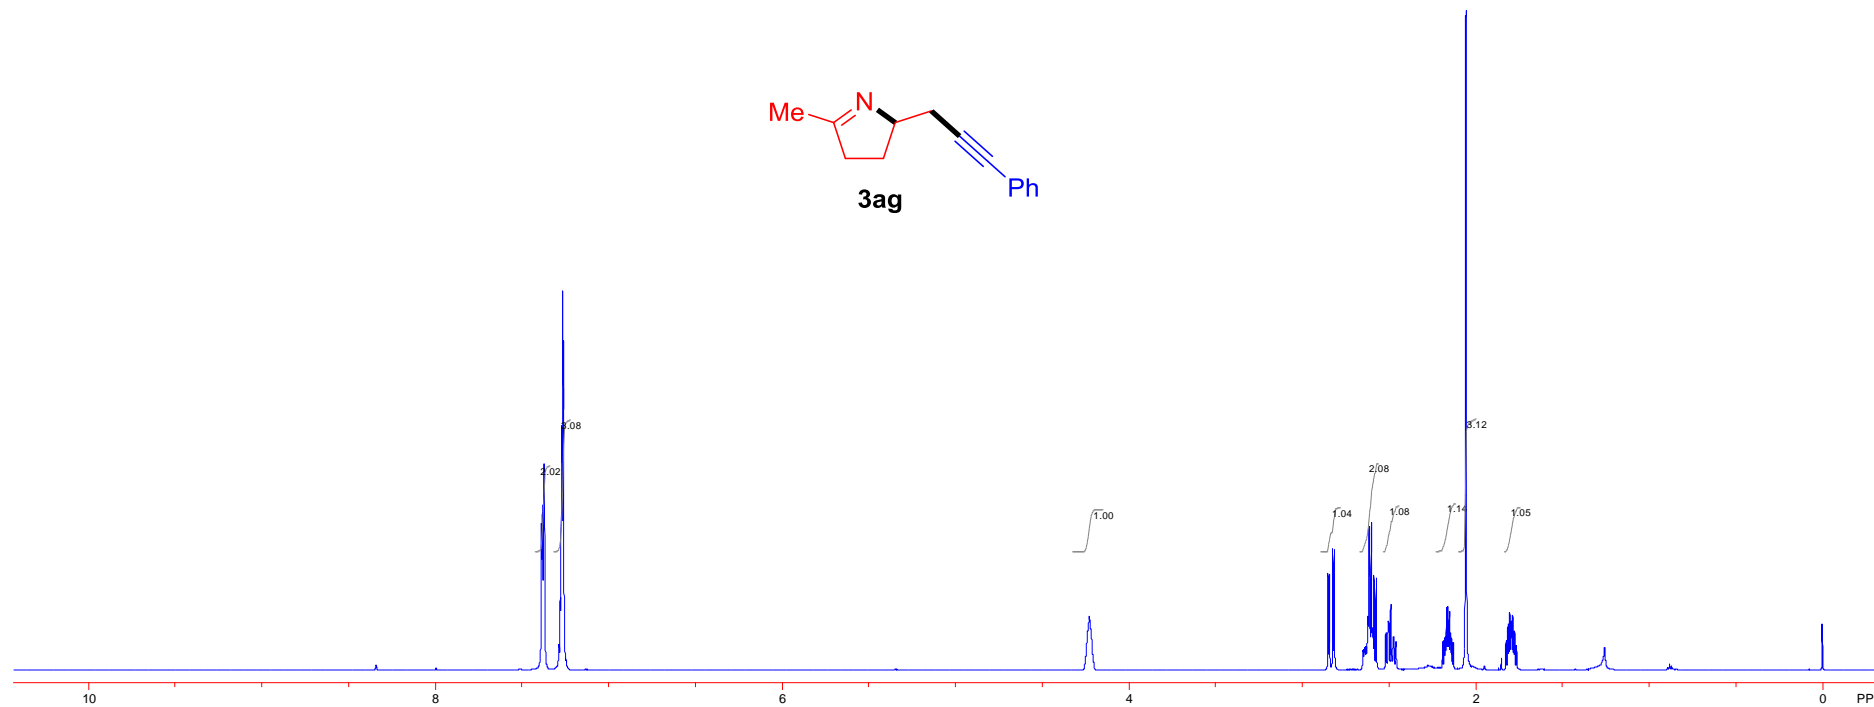

$^{13}\text{C}$  NMR (151 MHz,  $\text{CDCl}_3$ )

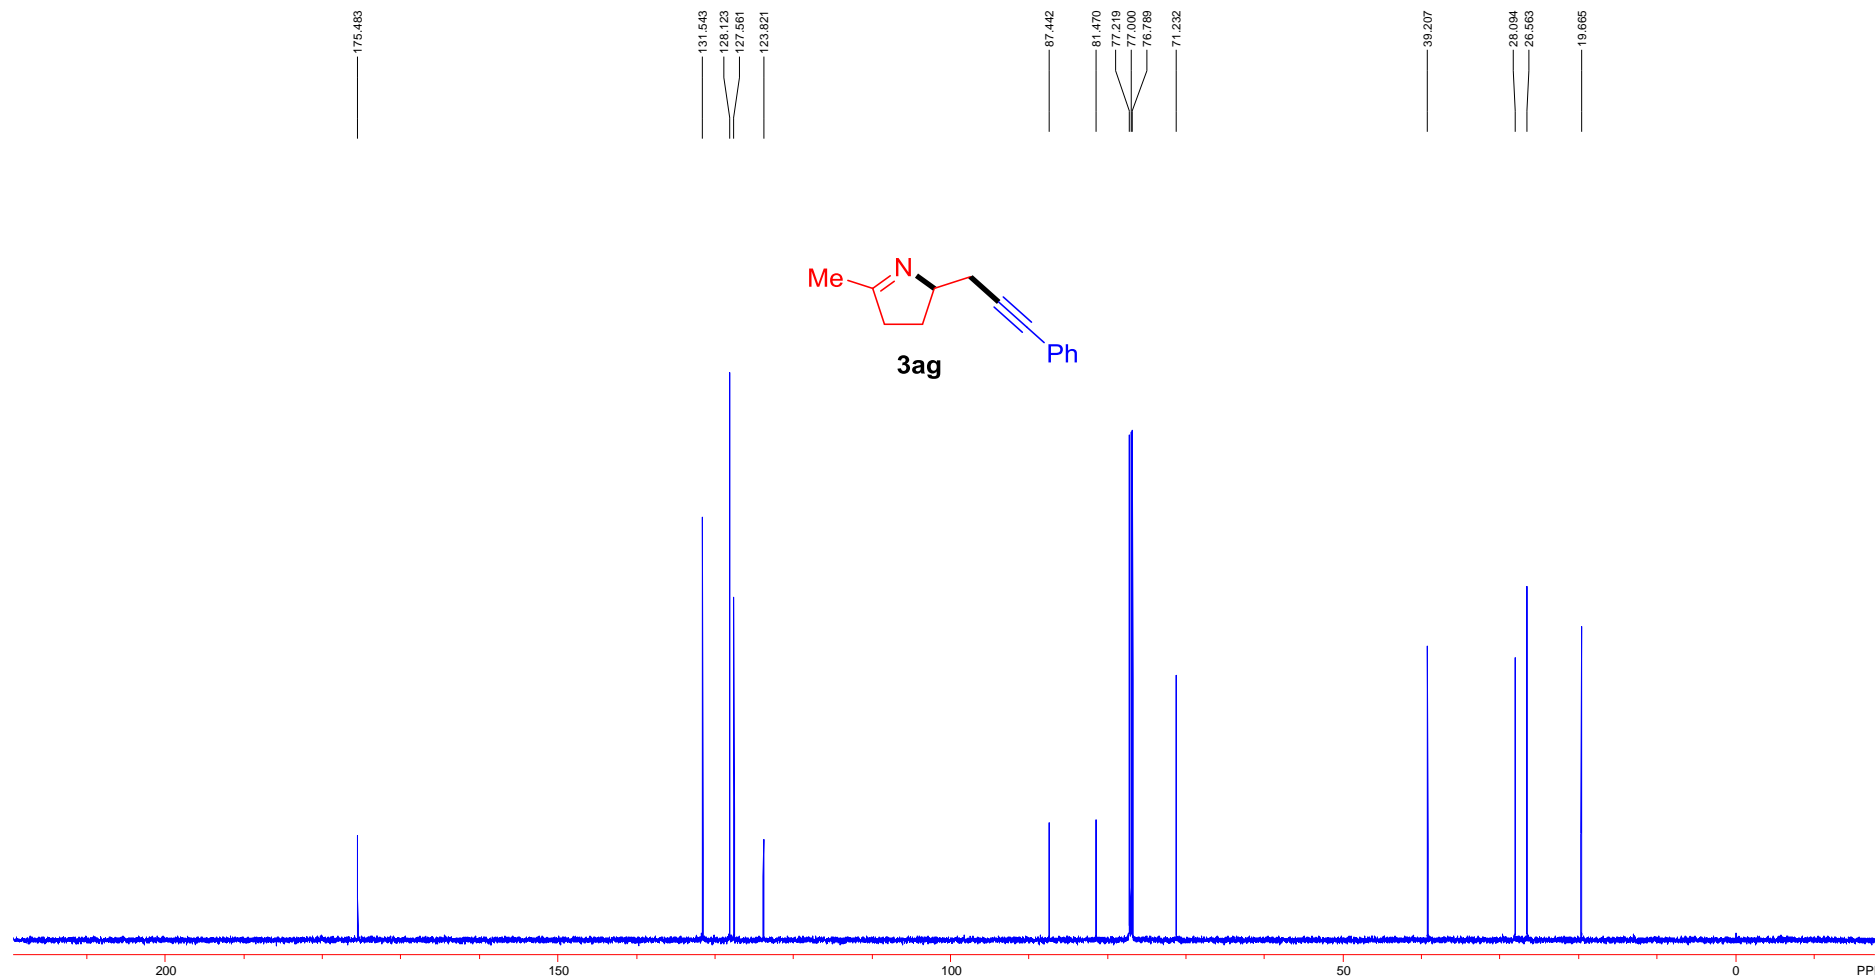

$^1\text{H}$  NMR(600 MHz,  $\text{CDCl}_3$ )

7.388  
7.378  
7.265

4.218

2.837  
2.809  
2.591  
2.579  
2.563  
2.551  
2.499  
2.495  
2.482  
2.470  
2.467  
2.456  
2.374  
2.359  
2.345  
2.331  
2.317  
2.181  
2.156  
2.143  
2.133  
2.127  
2.121  
2.119  
1.822  
1.812  
1.802  
1.792  
1.779  
1.772  
1.767  
1.762  
1.752  
1.745  
1.877  
0.864  
0.823

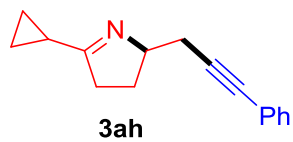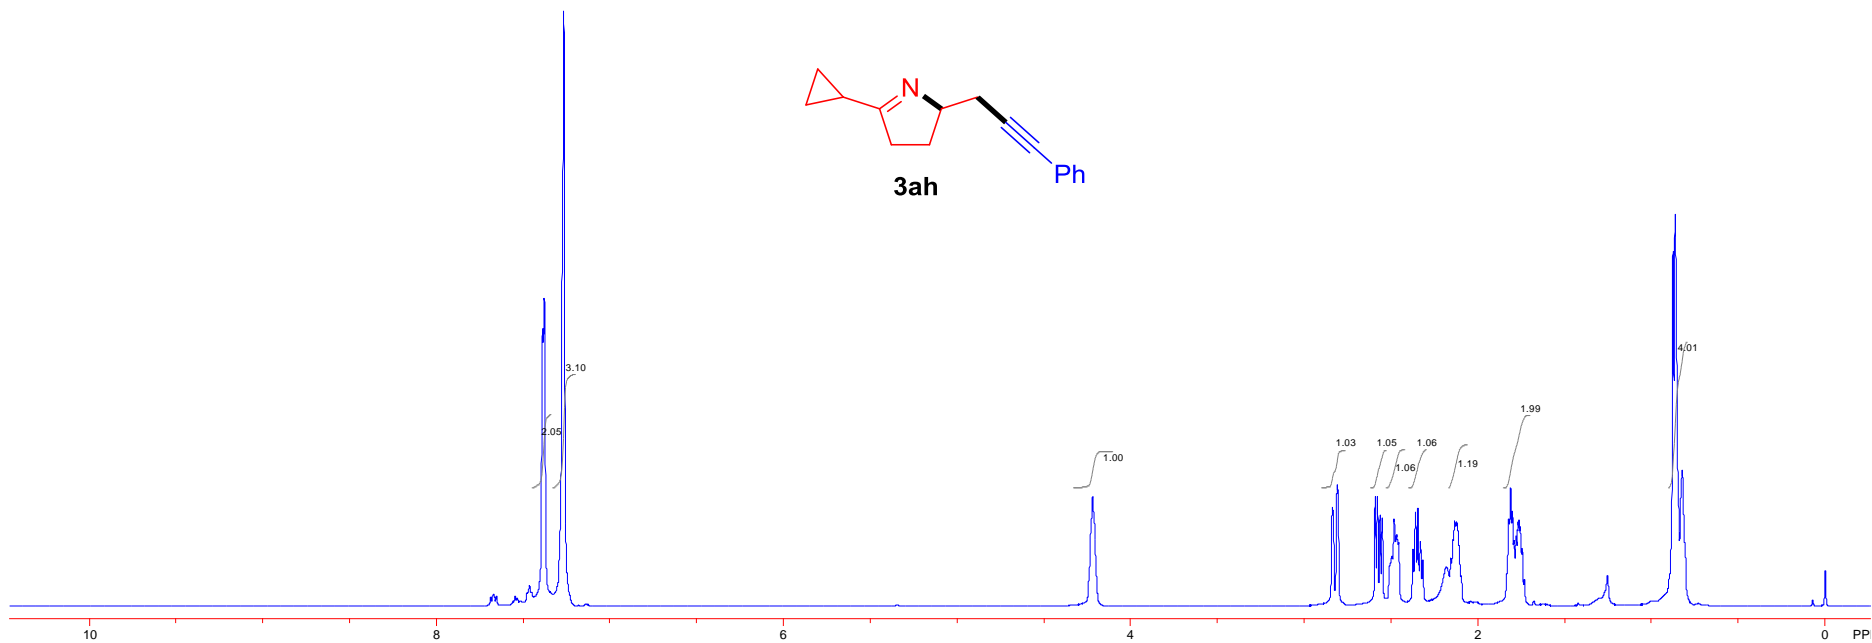

$^{13}\text{C}$  NMR (151 MHz,  $\text{CDCl}_3$ )

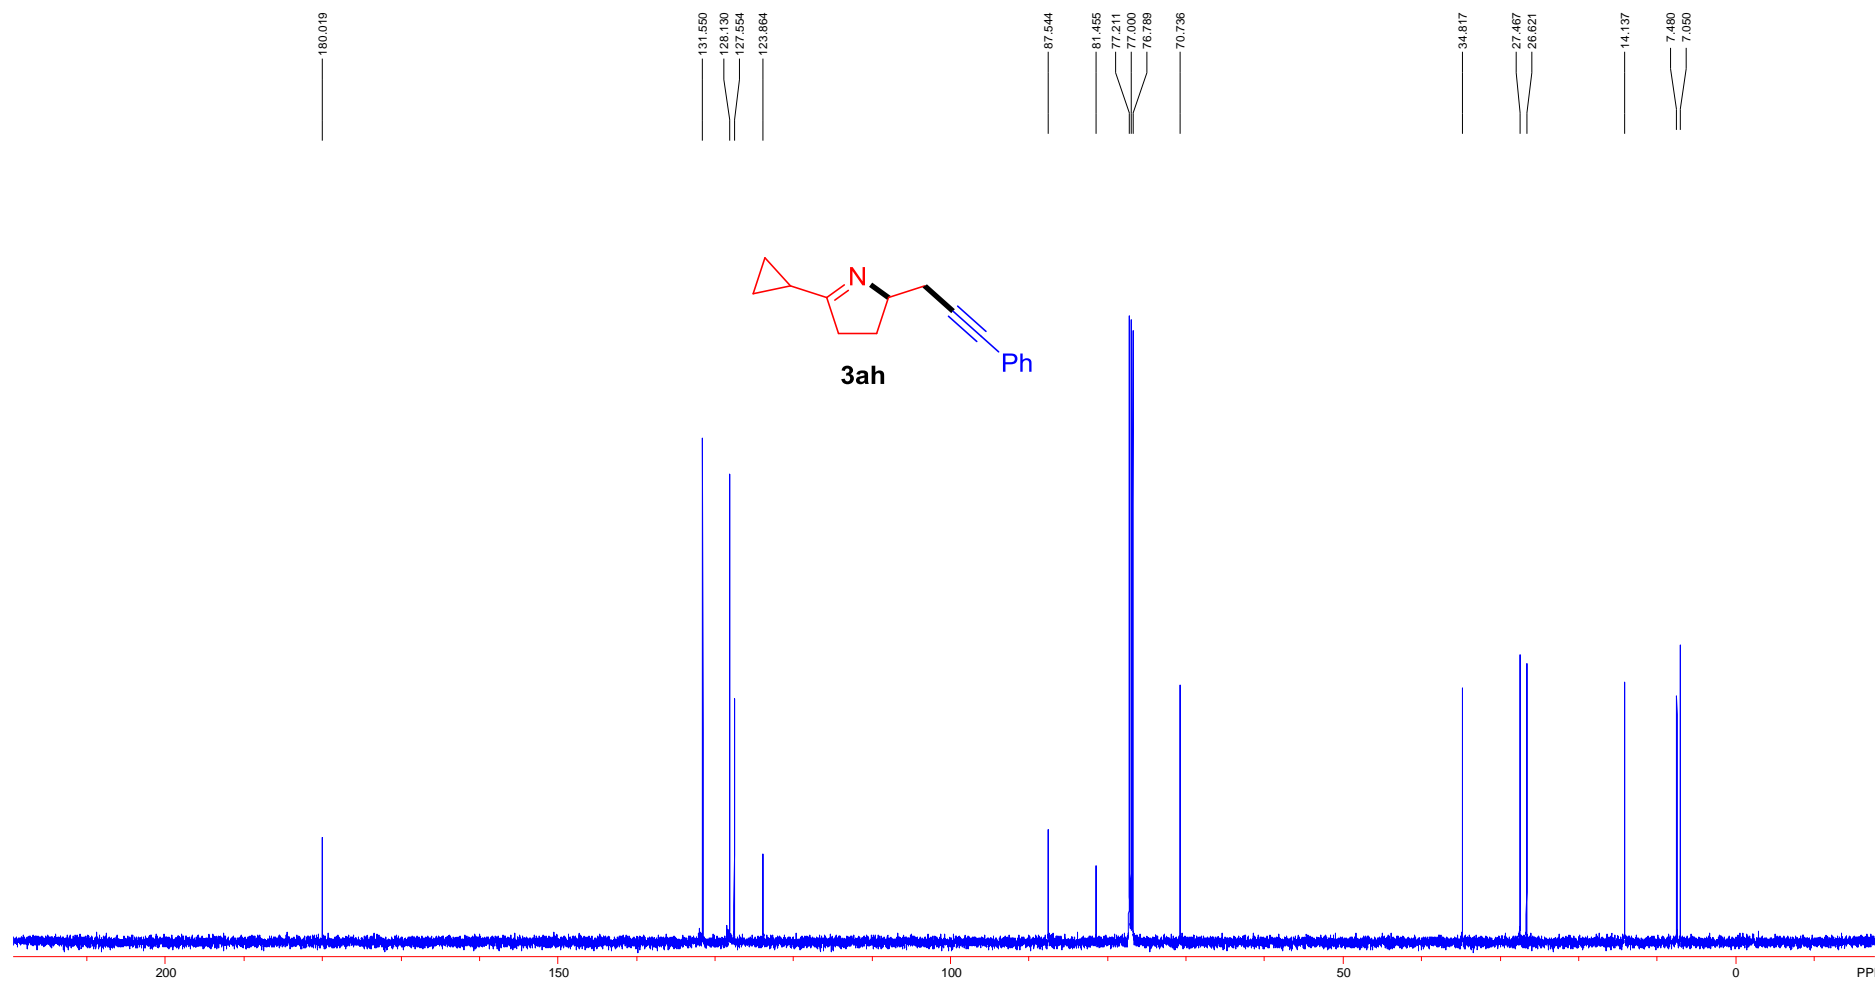

$^1\text{H}$  NMR(600 MHz,  $\text{CDCl}_3$ )

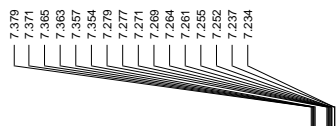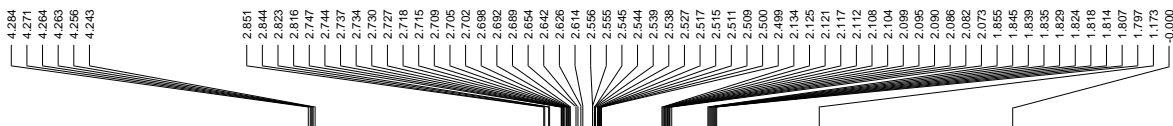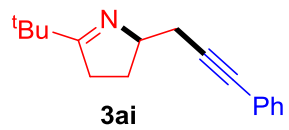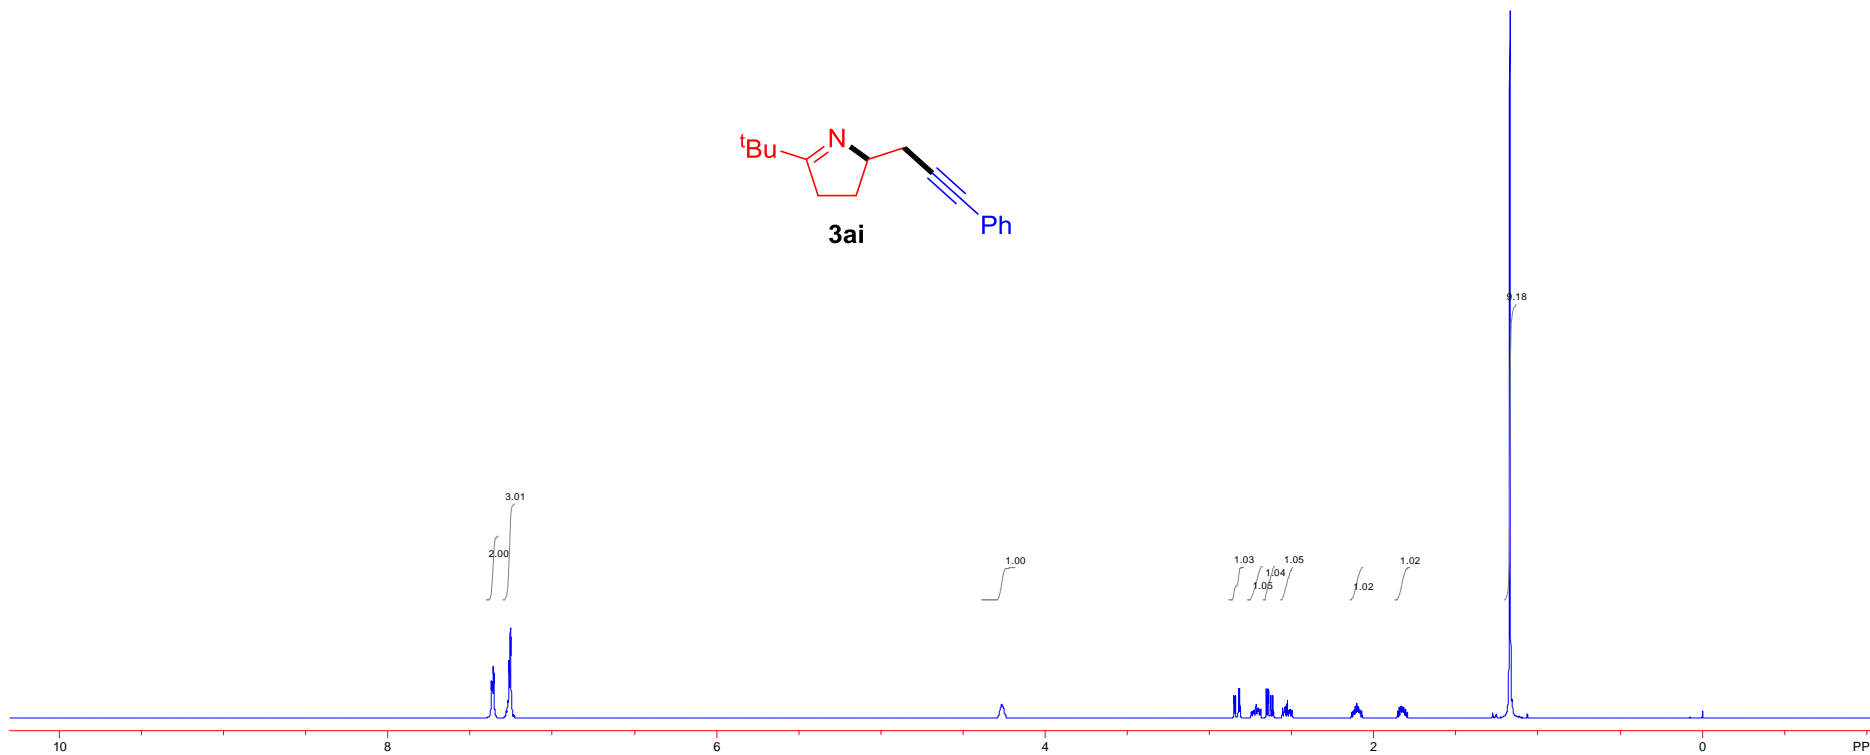

$^{13}\text{C}$  NMR (151 MHz,  $\text{CDCl}_3$ )

185.342

131.470  
128.101  
127.481  
123.864

87.449  
81.339  
77.211  
77.000  
76.789  
70.488

35.714  
33.709  
28.232  
27.527  
26.463

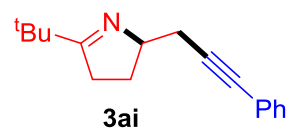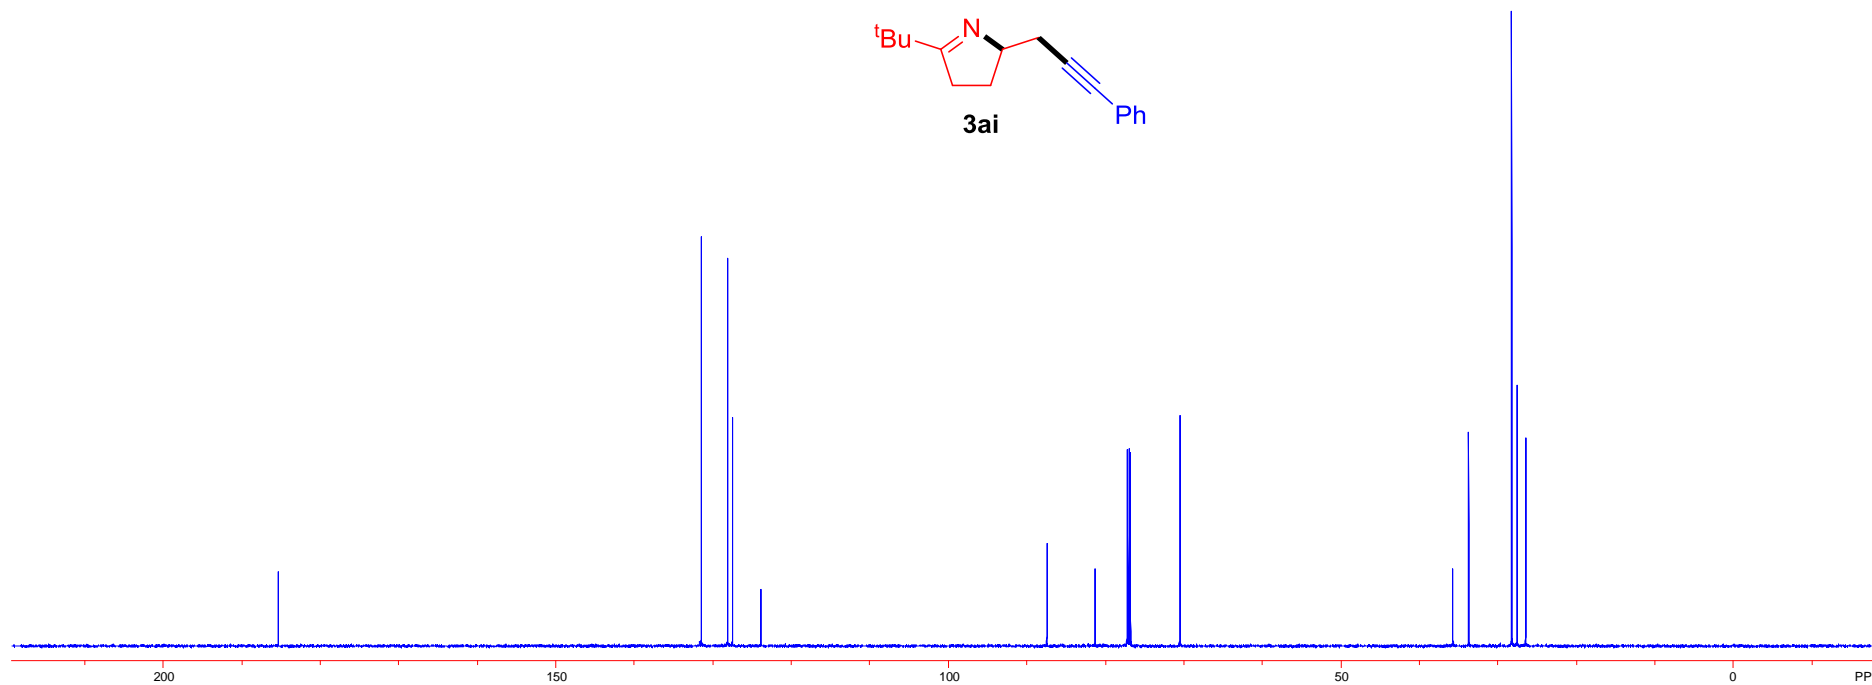

$^1\text{H}$  NMR(600 MHz,  $\text{CDCl}_3$ )

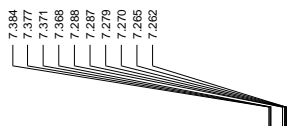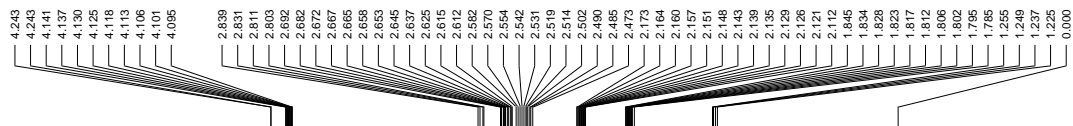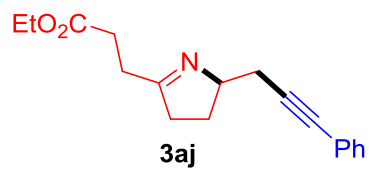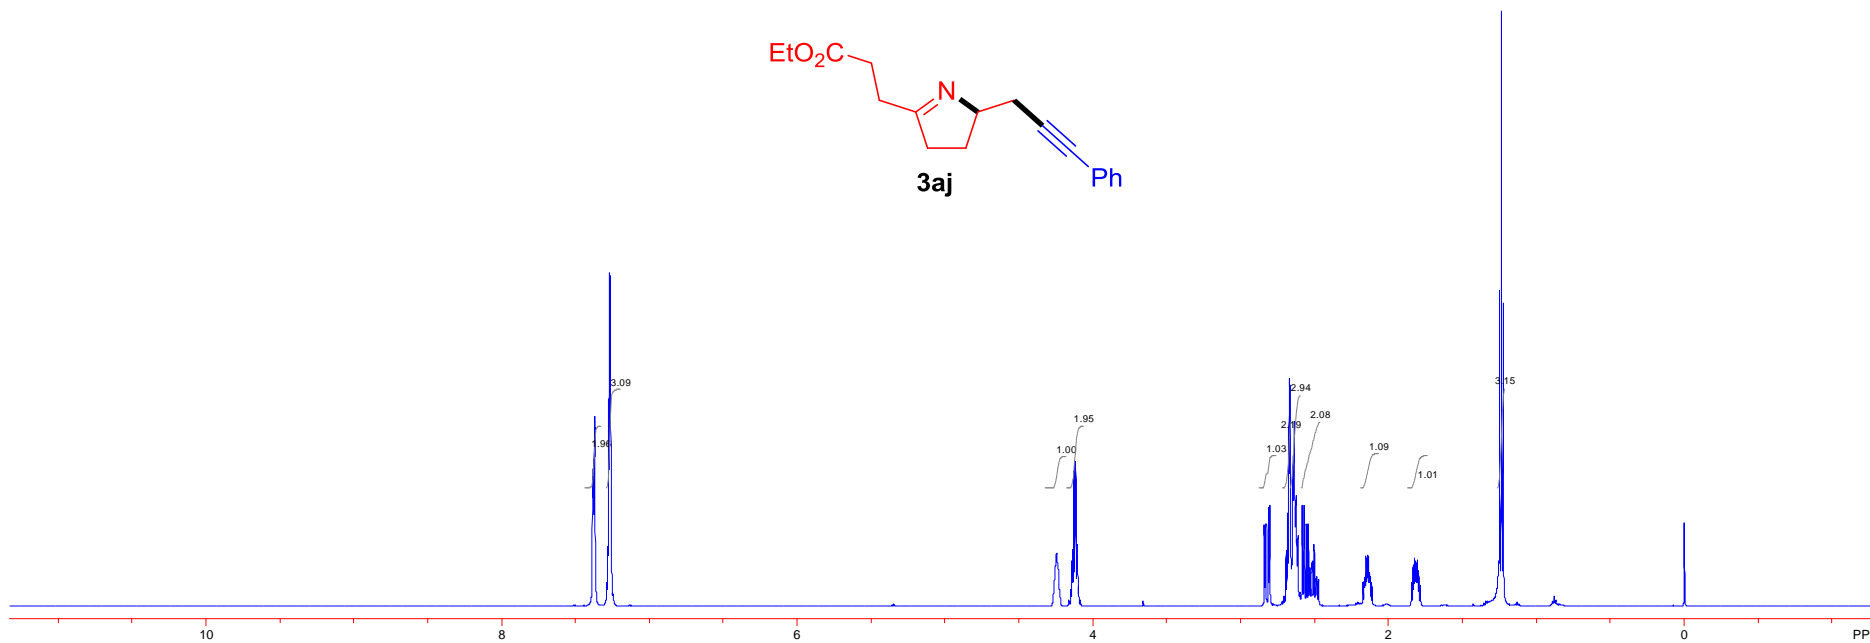



$^{13}\text{C}$  NMR (151 MHz,  $\text{CDCl}_3$ )

176.825  
172.916

131.528  
128.123  
127.561  
123.777

87.347  
81.433  
77.211  
77.000  
76.789  
70.999  
60.389

38.062

30.821  
28.383  
27.605  
26.461

14.137

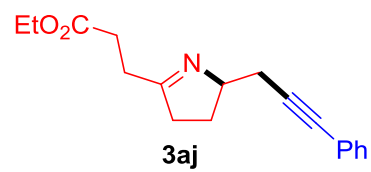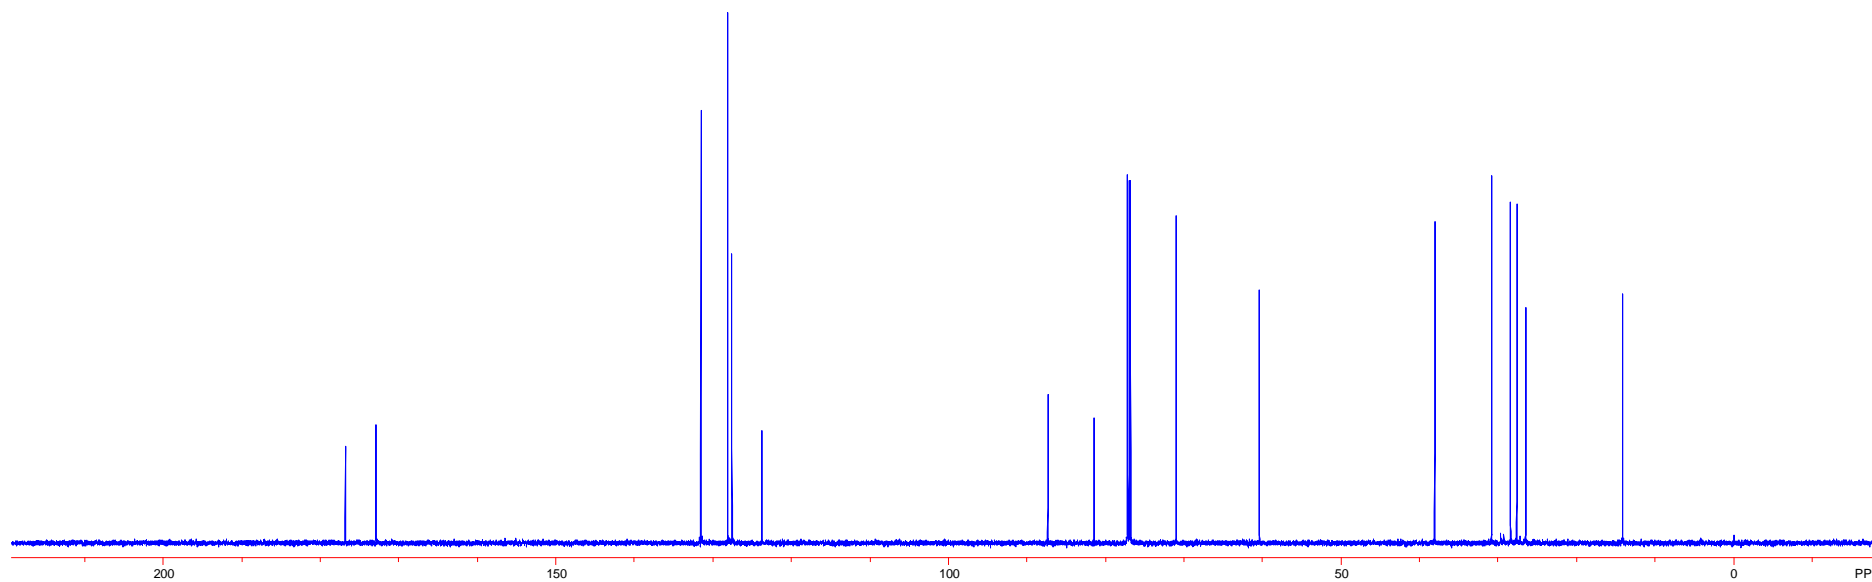

$^1\text{H}$  NMR(400 MHz,  $\text{CDCl}_3$ )

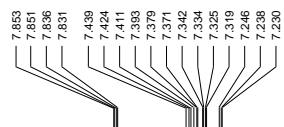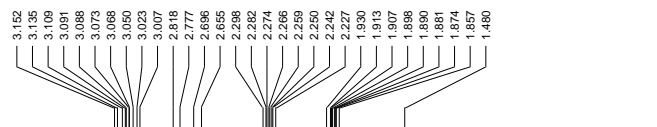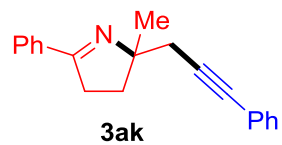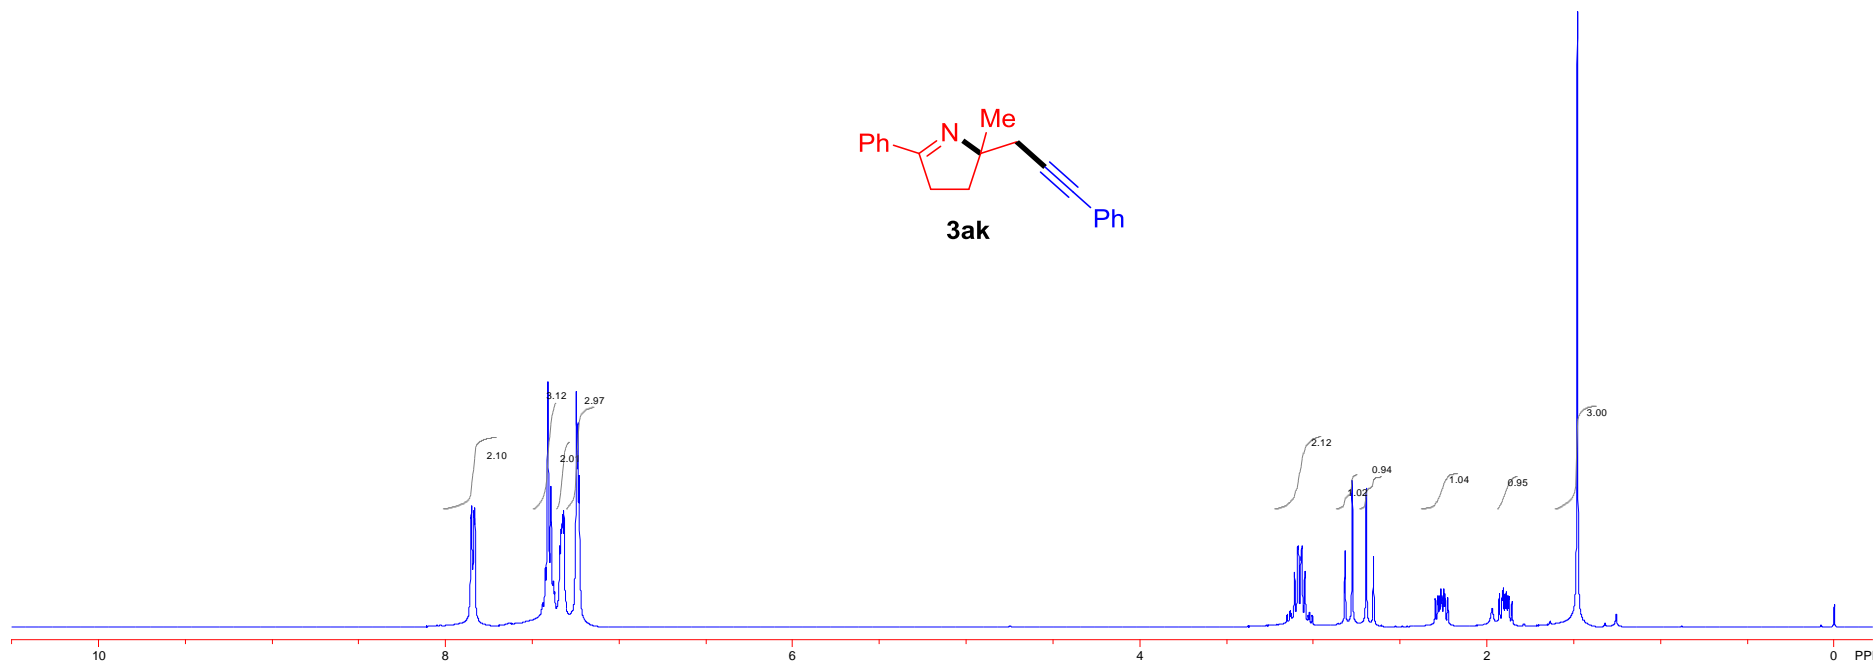

$^{13}\text{C}$  NMR (100 MHz,  $\text{CDCl}_3$ )

171.264

134.616  
131.525  
130.376  
128.347  
128.130  
127.740  
127.545  
123.840

87.581

81.760  
77.318  
77.000  
76.682  
76.087

35.700  
33.707  
32.732  
27.206

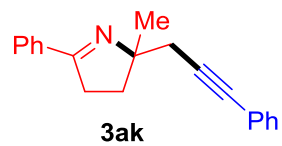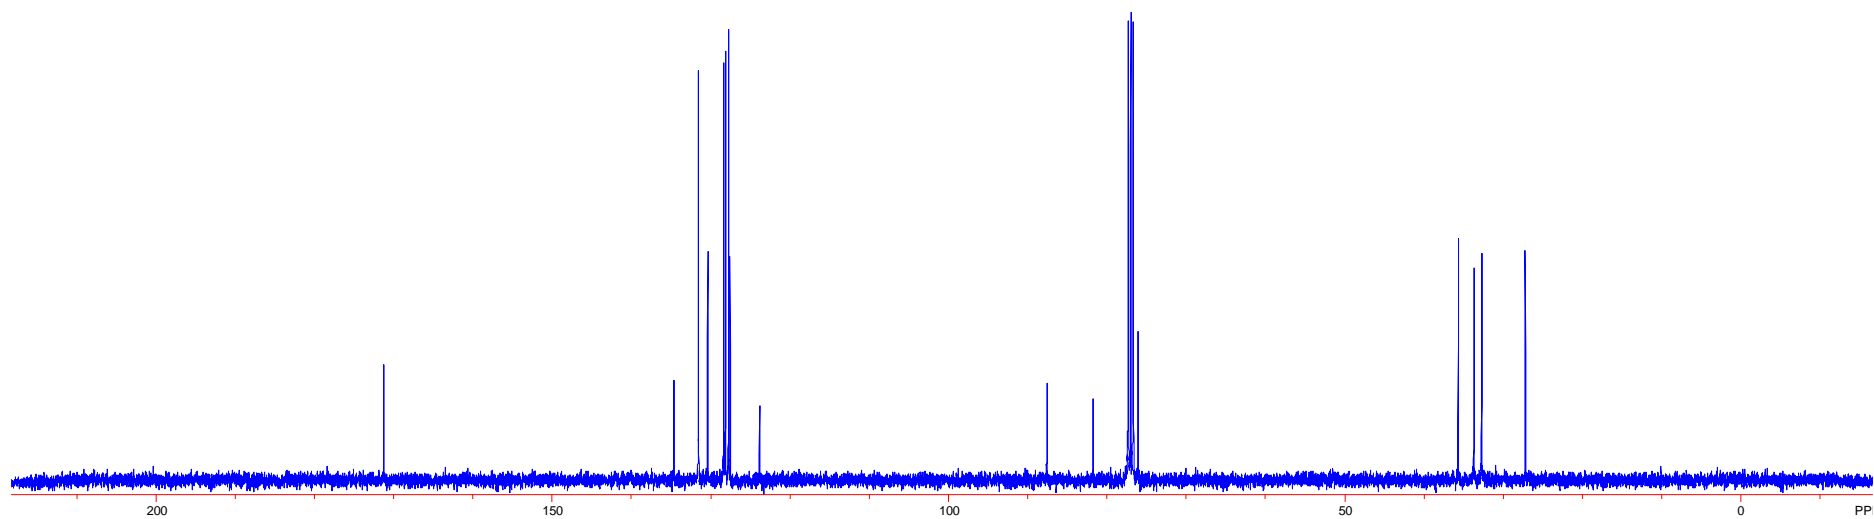

$^1\text{H}$  NMR(400 MHz,  $\text{CDCl}_3$ )

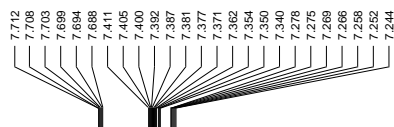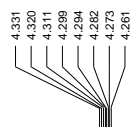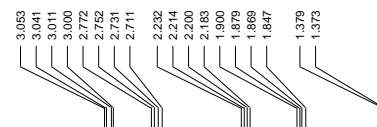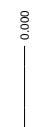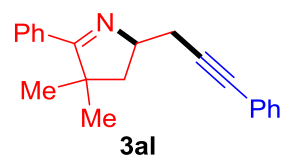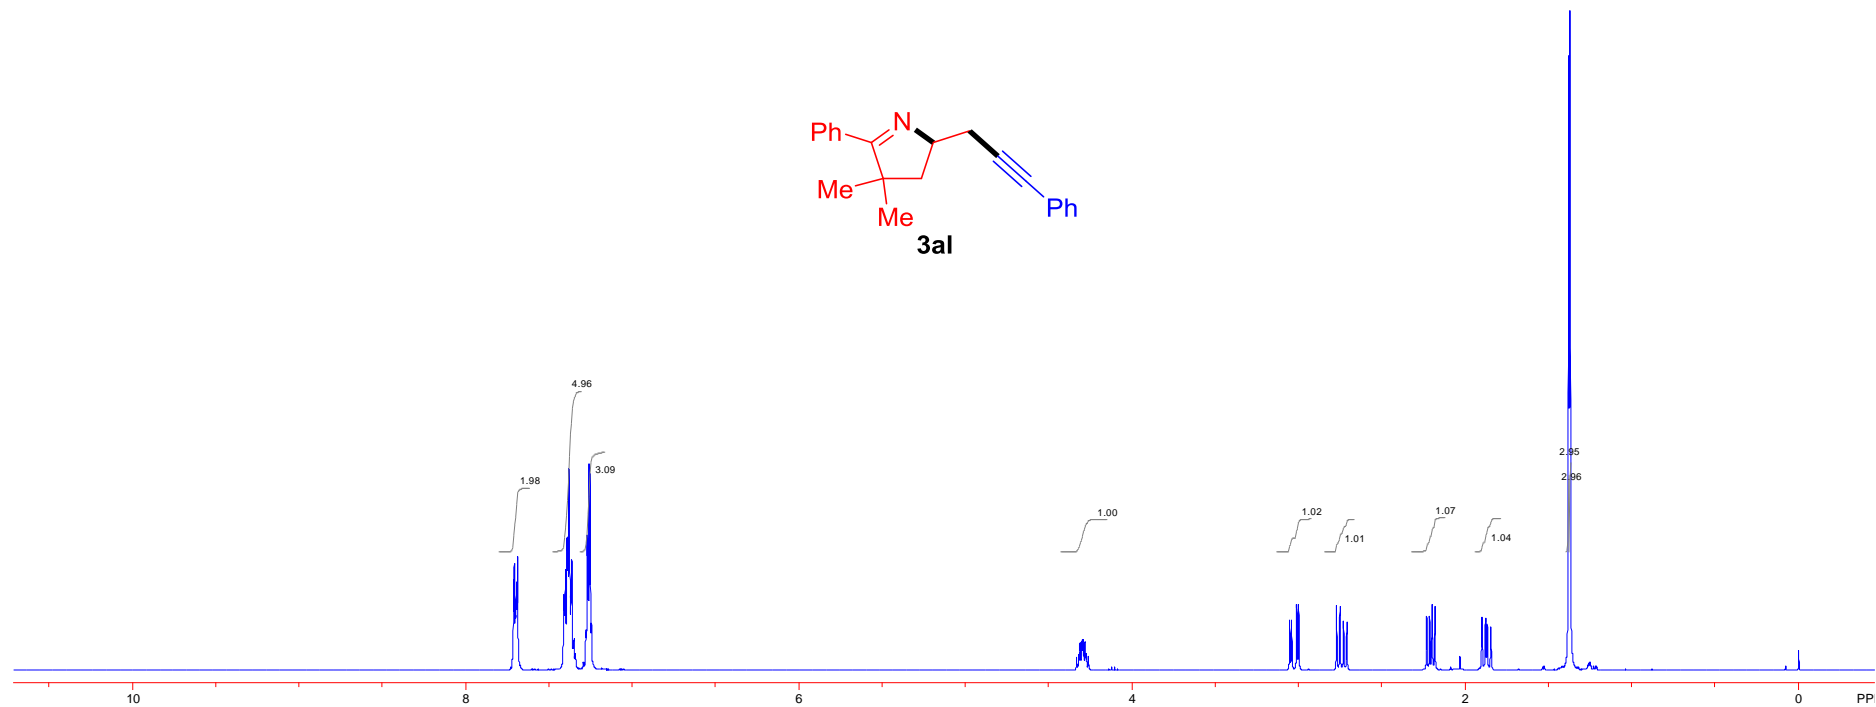

$^{13}\text{C}$  NMR (100 MHz,  $\text{CDCl}_3$ )

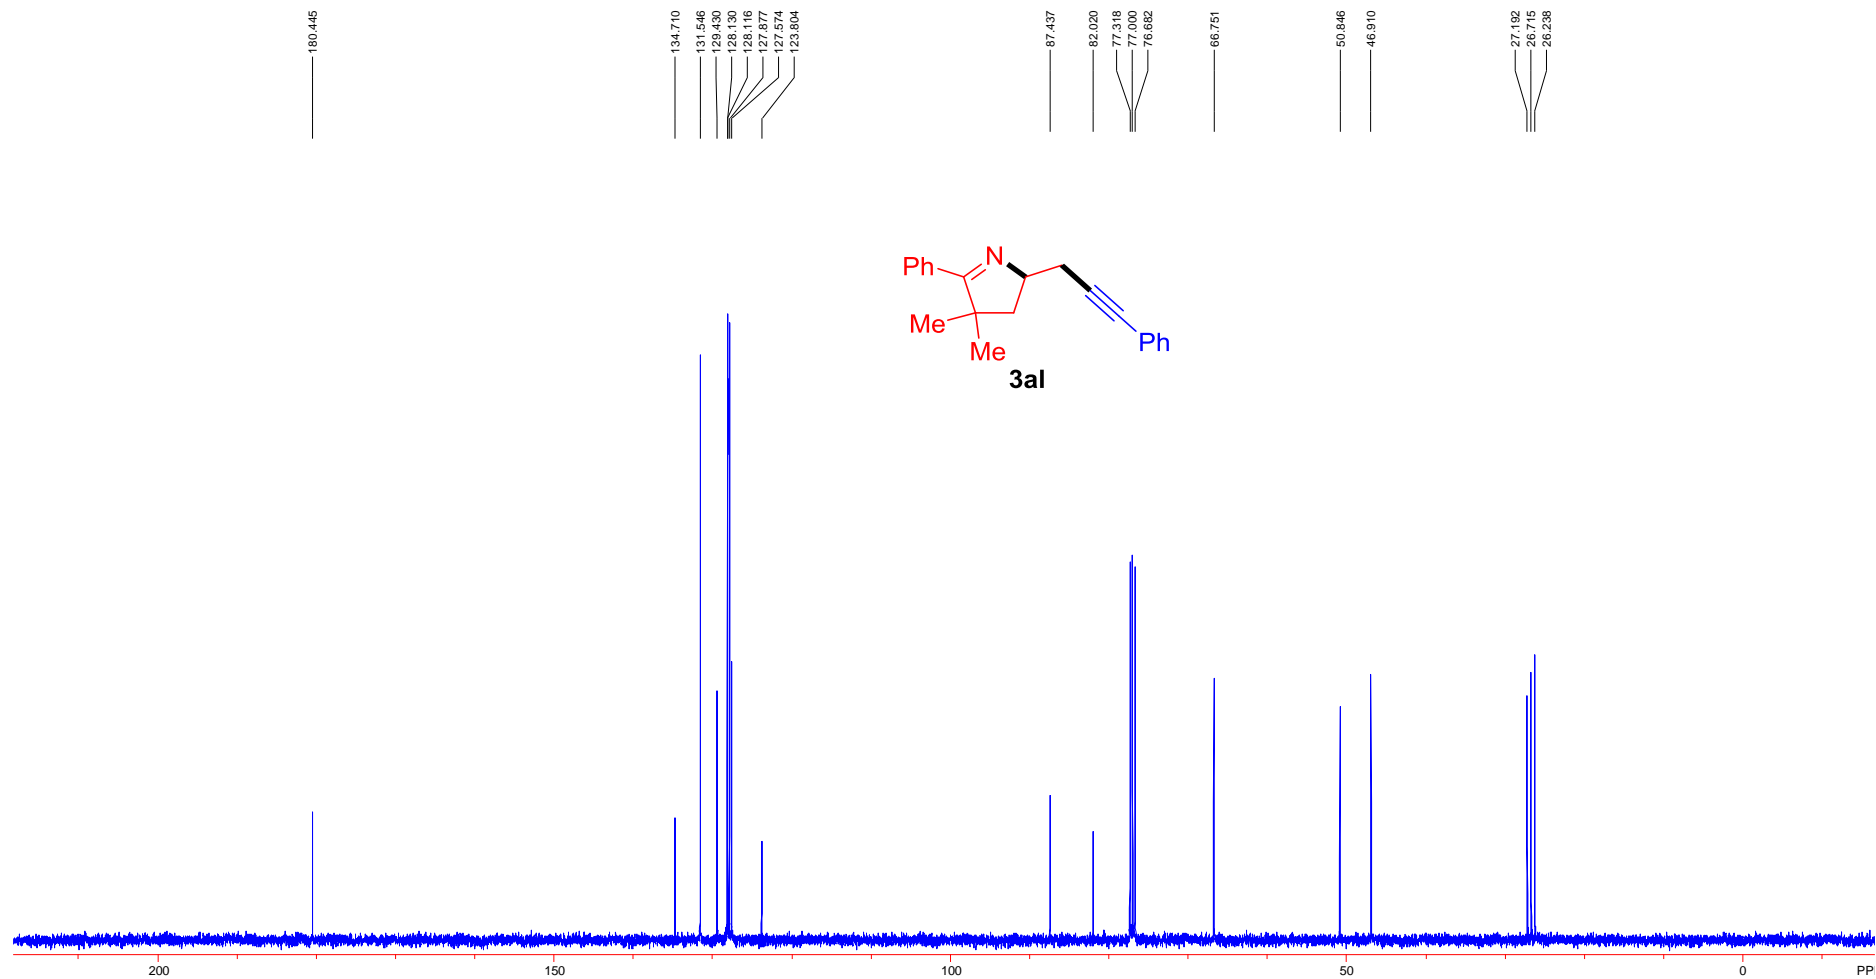

$^1\text{H}$  NMR(600 MHz,  $\text{CDCl}_3$ )

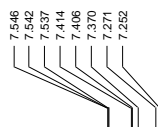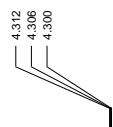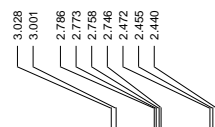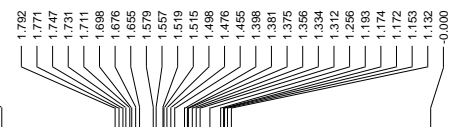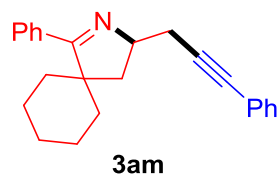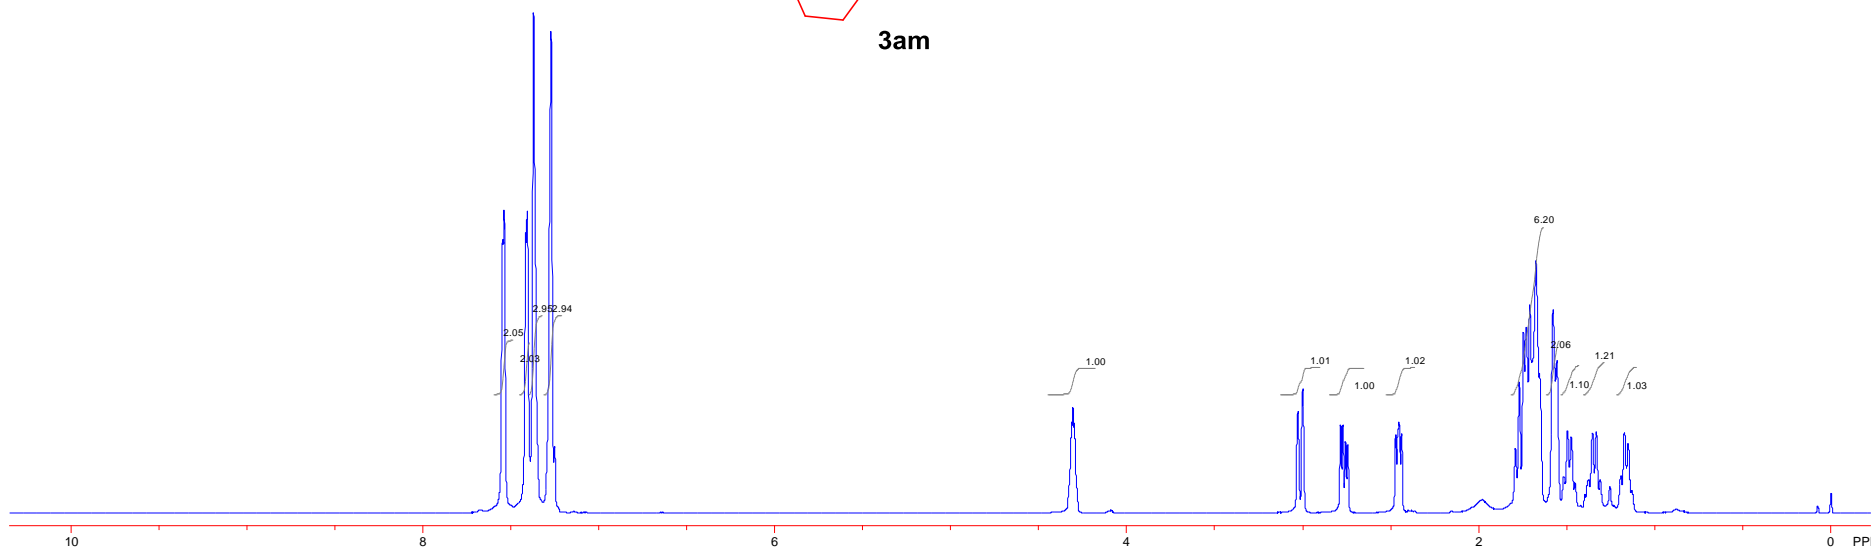

$^{13}\text{C}$  NMR (151 MHz,  $\text{CDCl}_3$ )

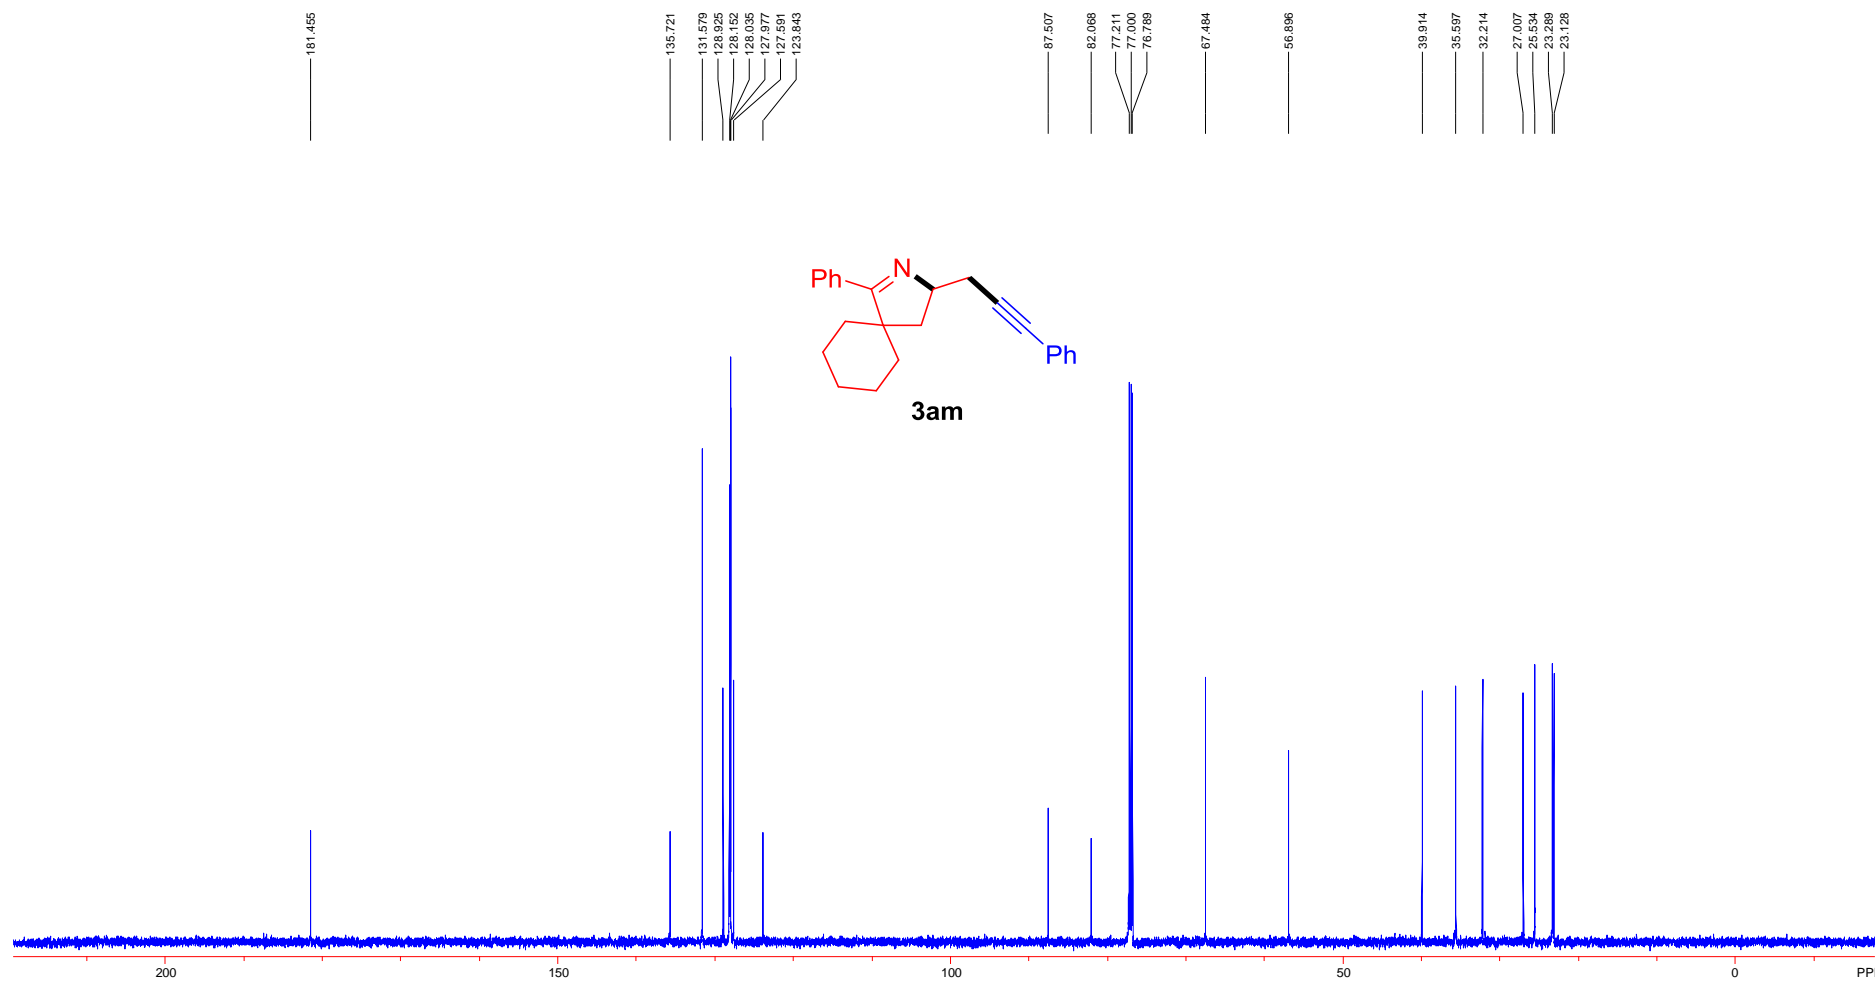

$^1\text{H}$  NMR(400 MHz,  $\text{CDCl}_3$ )

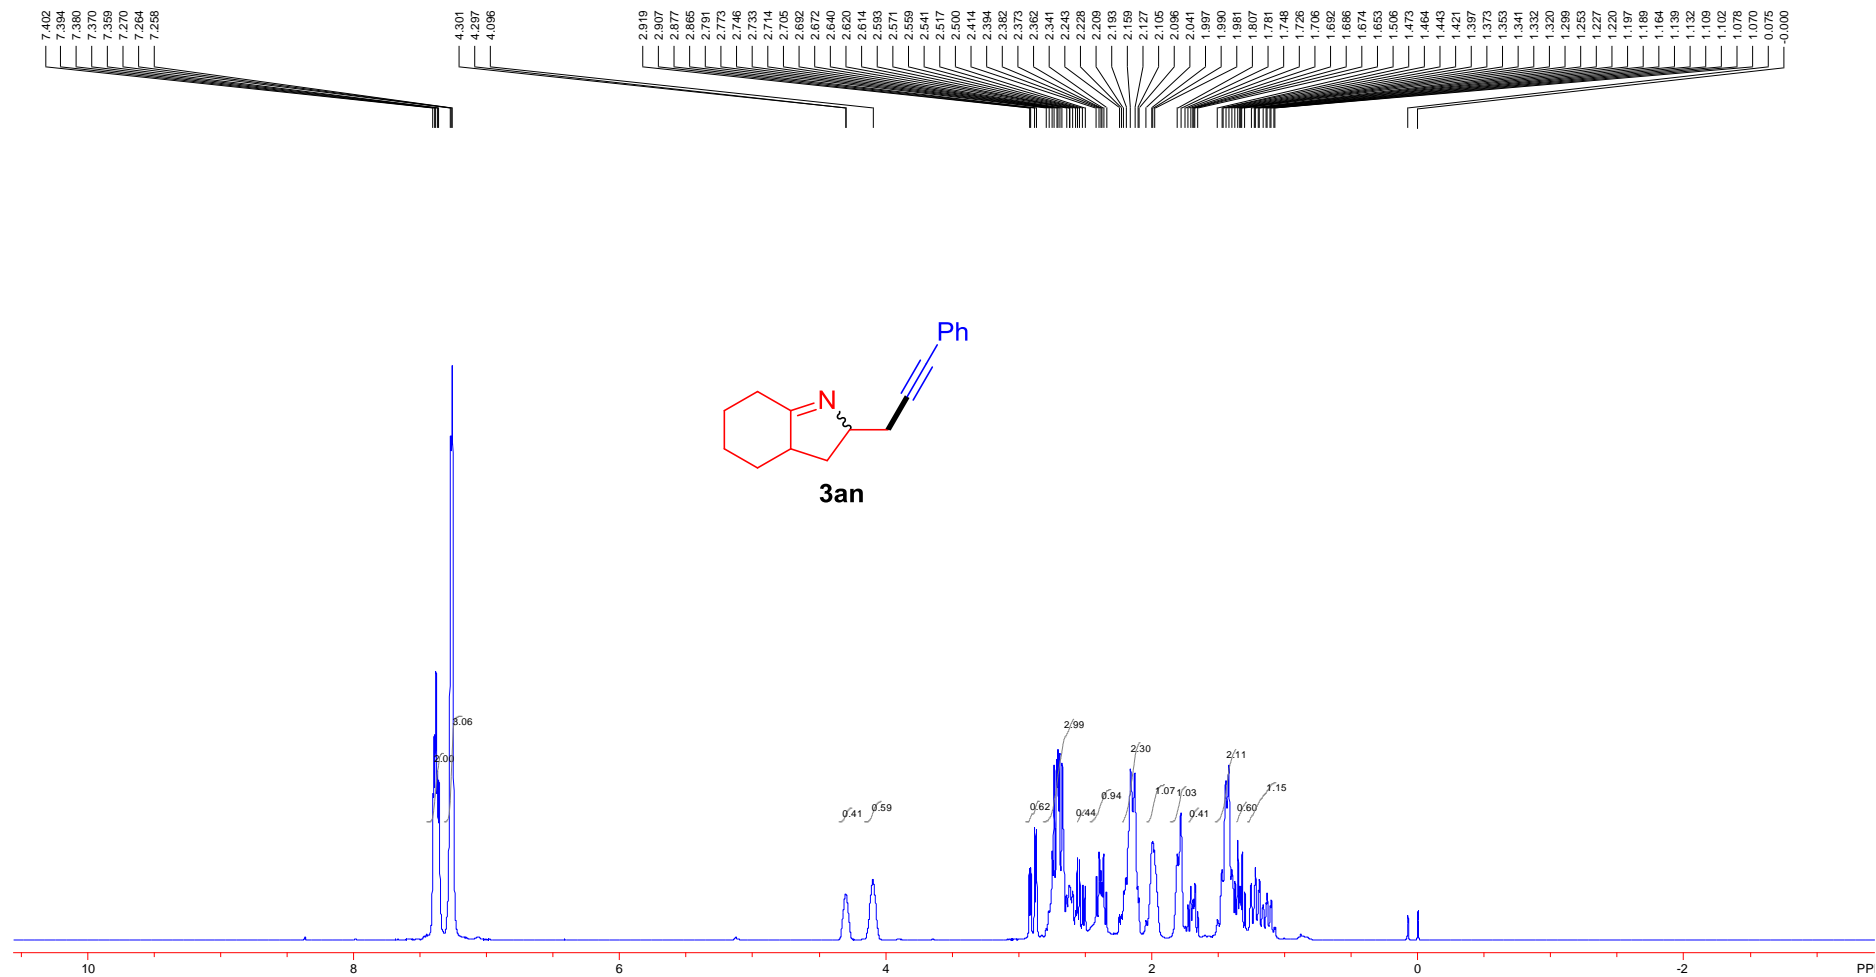



$^{13}\text{C}$  NMR (100 MHz,  $\text{CDCl}_3$ )

180.387  
179.917

131.510  
131.467  
128.116  
128.072  
127.531  
127.487  
123.840  
123.789

87.632  
87.538  
81.839  
81.240  
77.318  
77.000  
76.682  
69.344

48.786  
48.051

35.267  
34.920  
34.732  
34.219  
31.785  
31.677  
27.069  
26.881  
26.636  
26.527  
25.270  
25.140

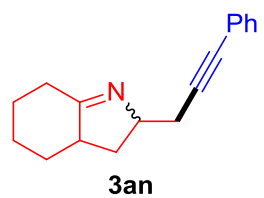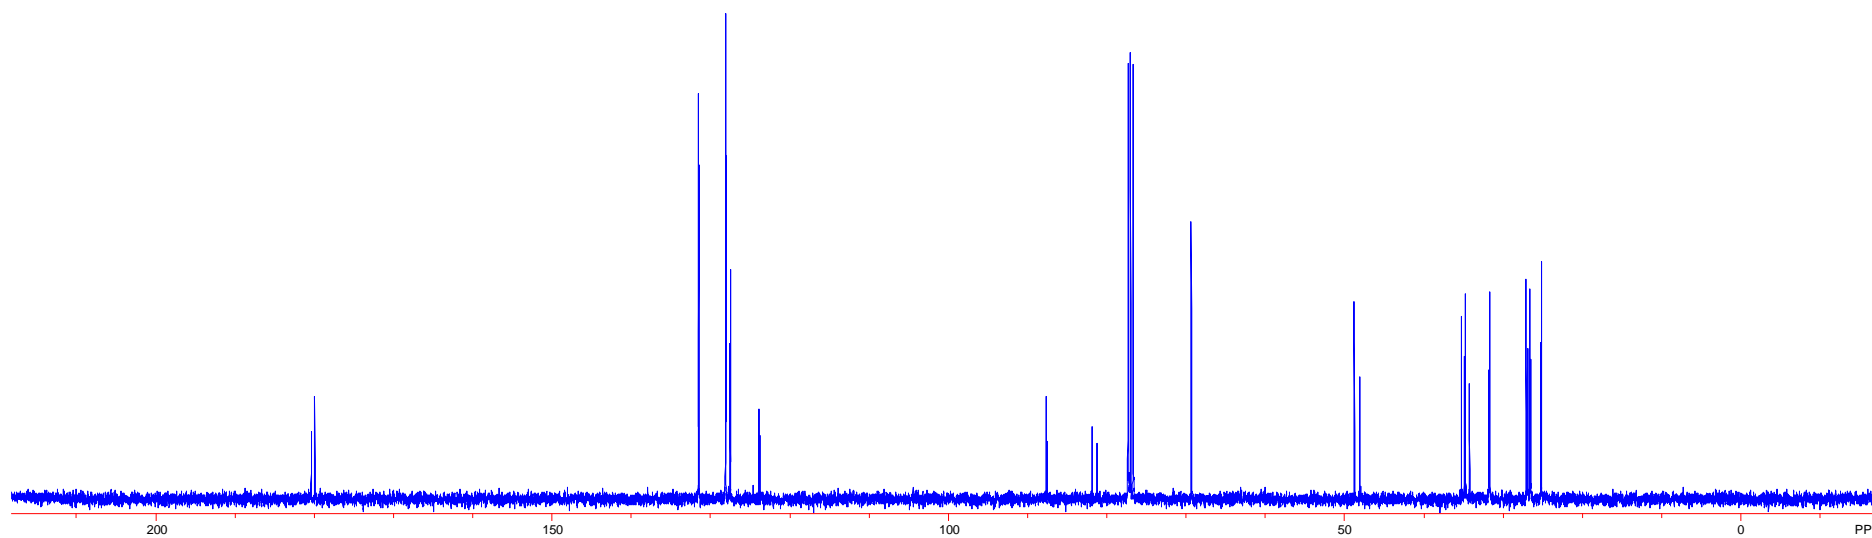

$^1\text{H}$  NMR(400 MHz,  $\text{CDCl}_3$ )

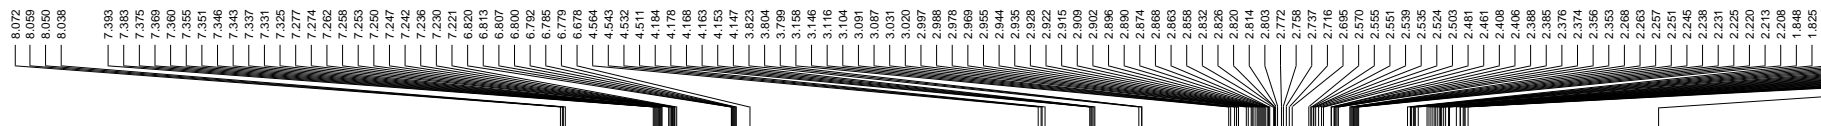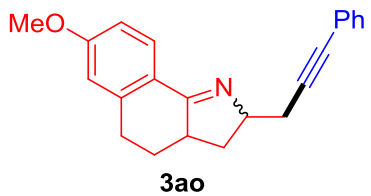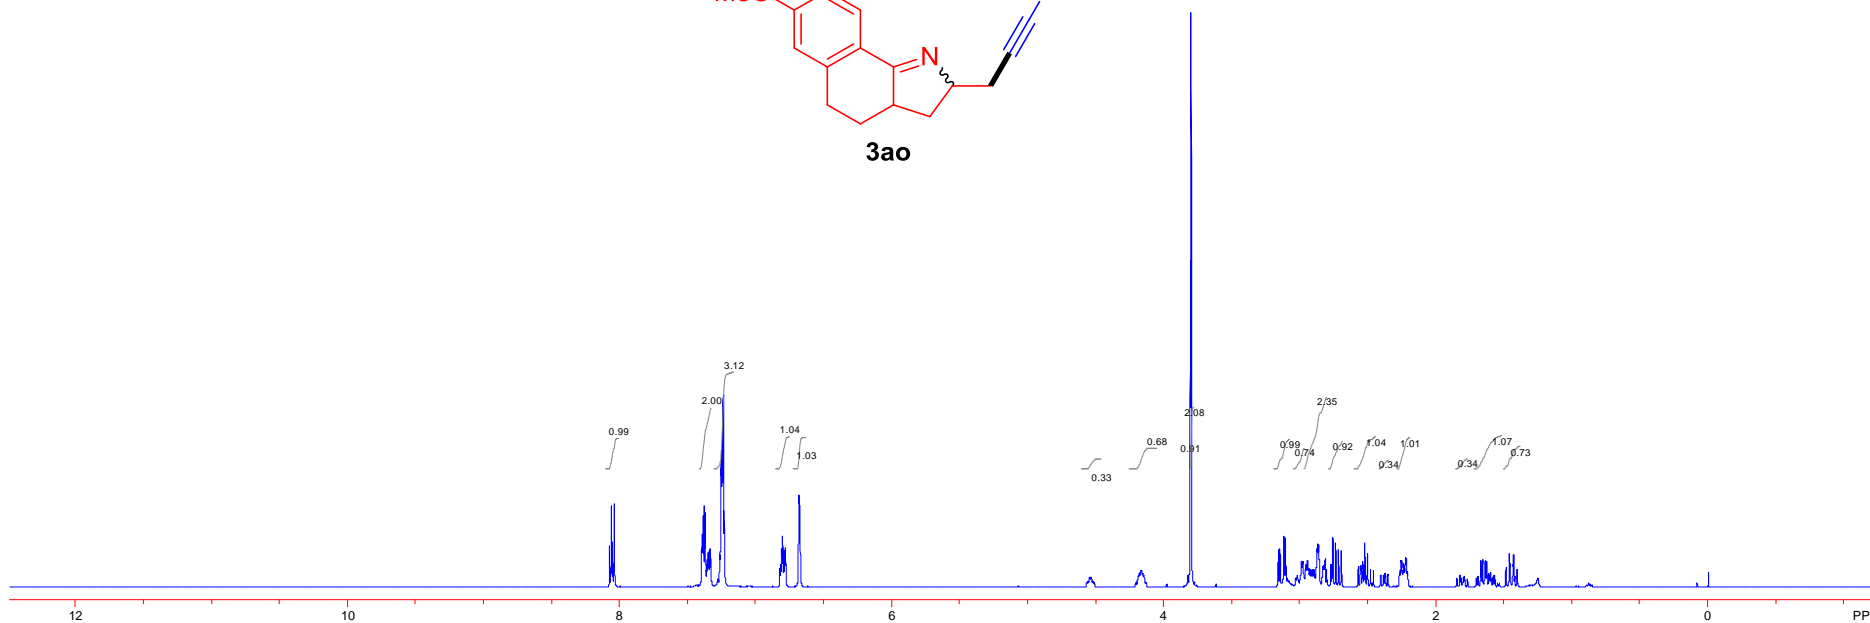

$^{13}\text{C}$  NMR (100 MHz,  $\text{CDCl}_3$ )

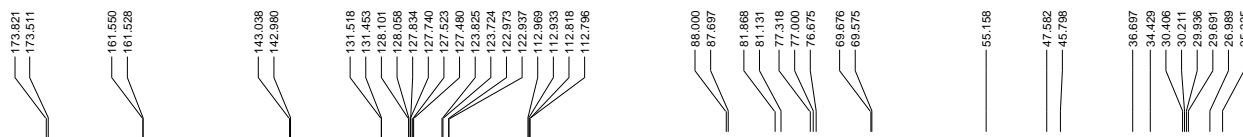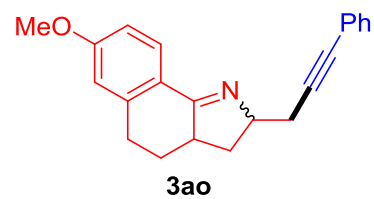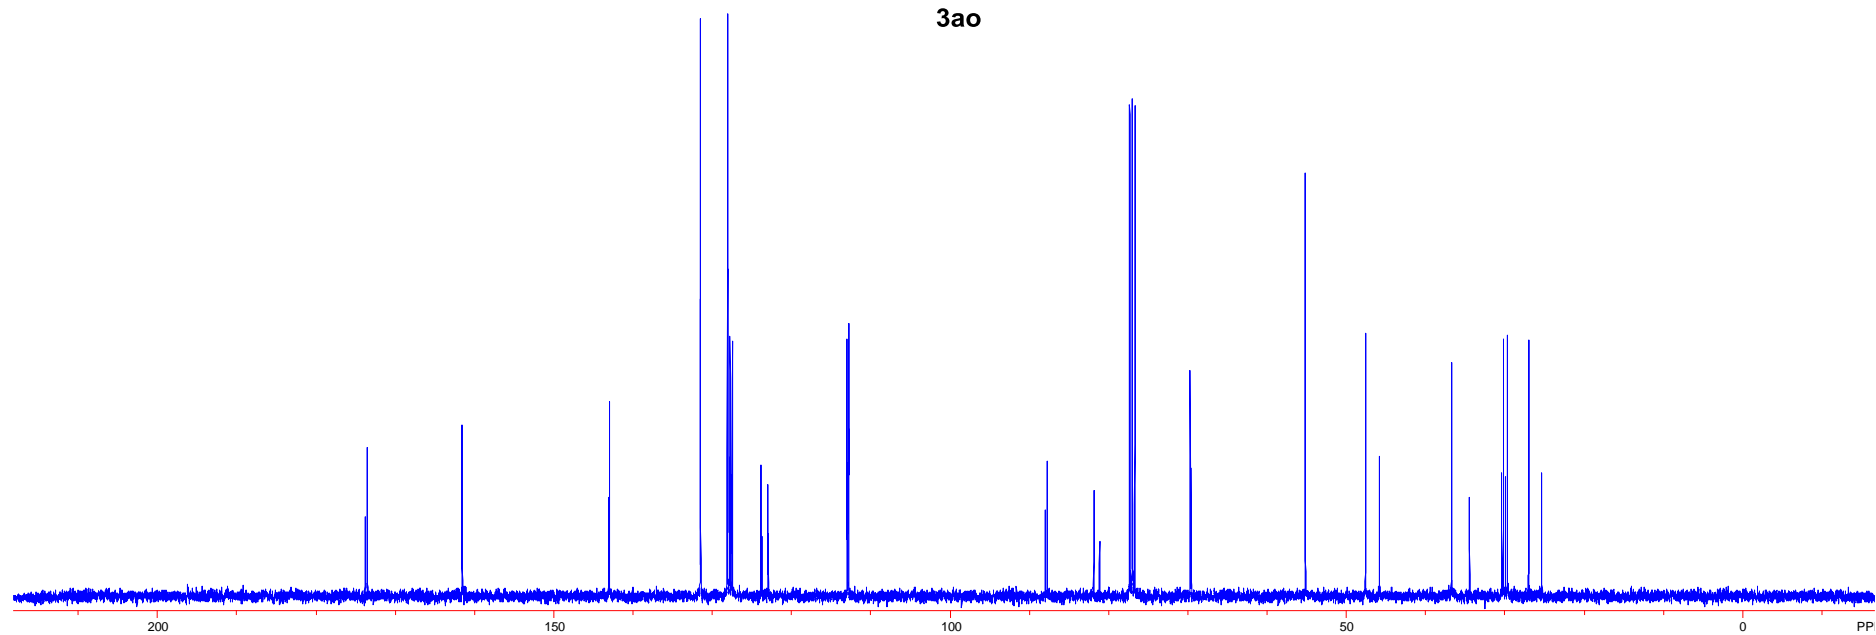

$^1\text{H}$  NMR(600 MHz,  $\text{CDCl}_3$ )

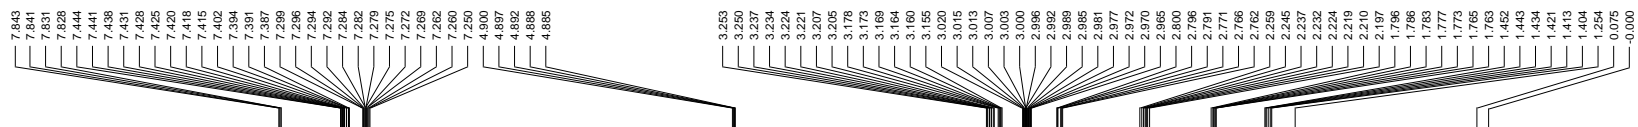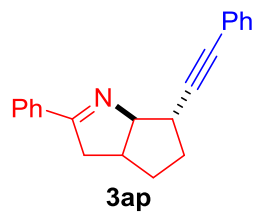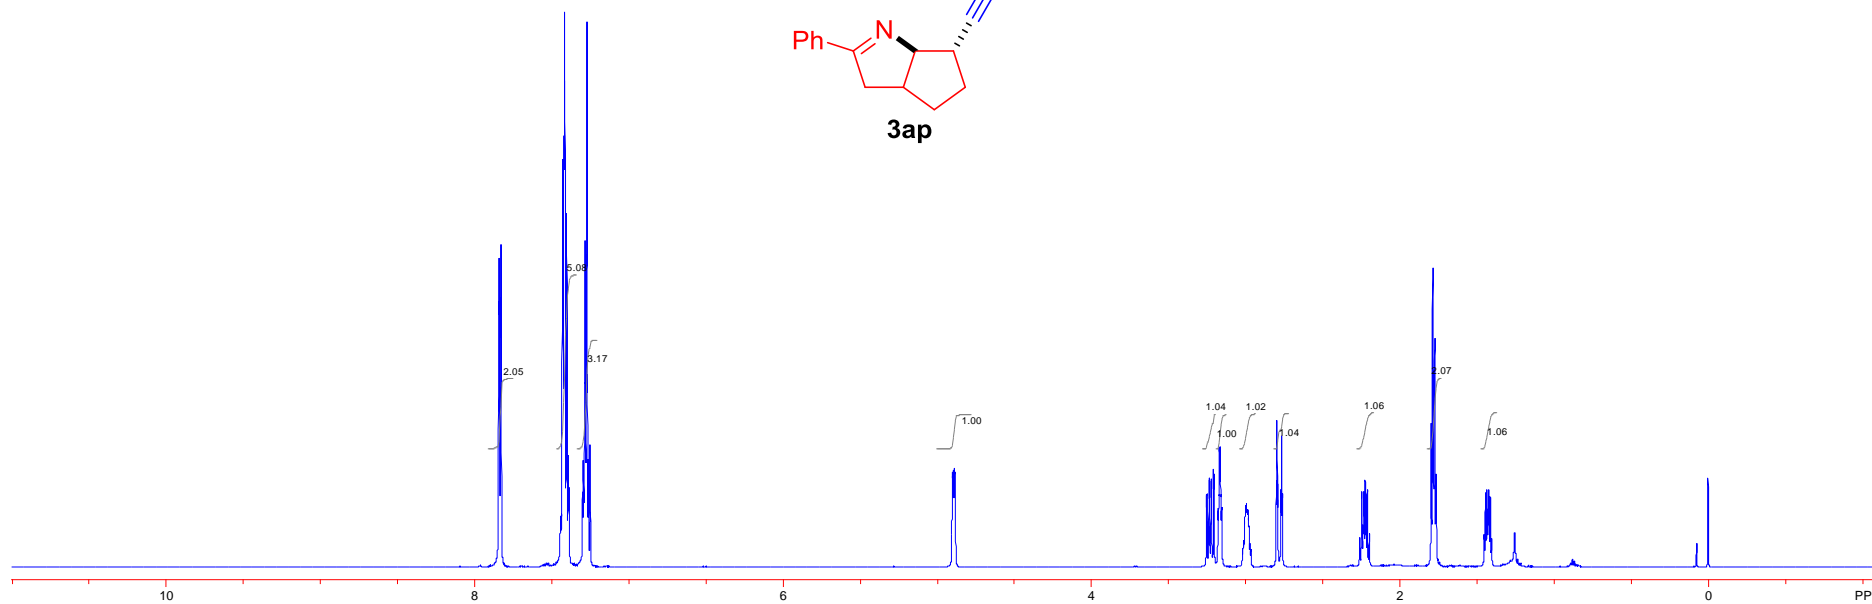

$^{13}\text{C}$  NMR (100 MHz,  $\text{CDCl}_3$ )

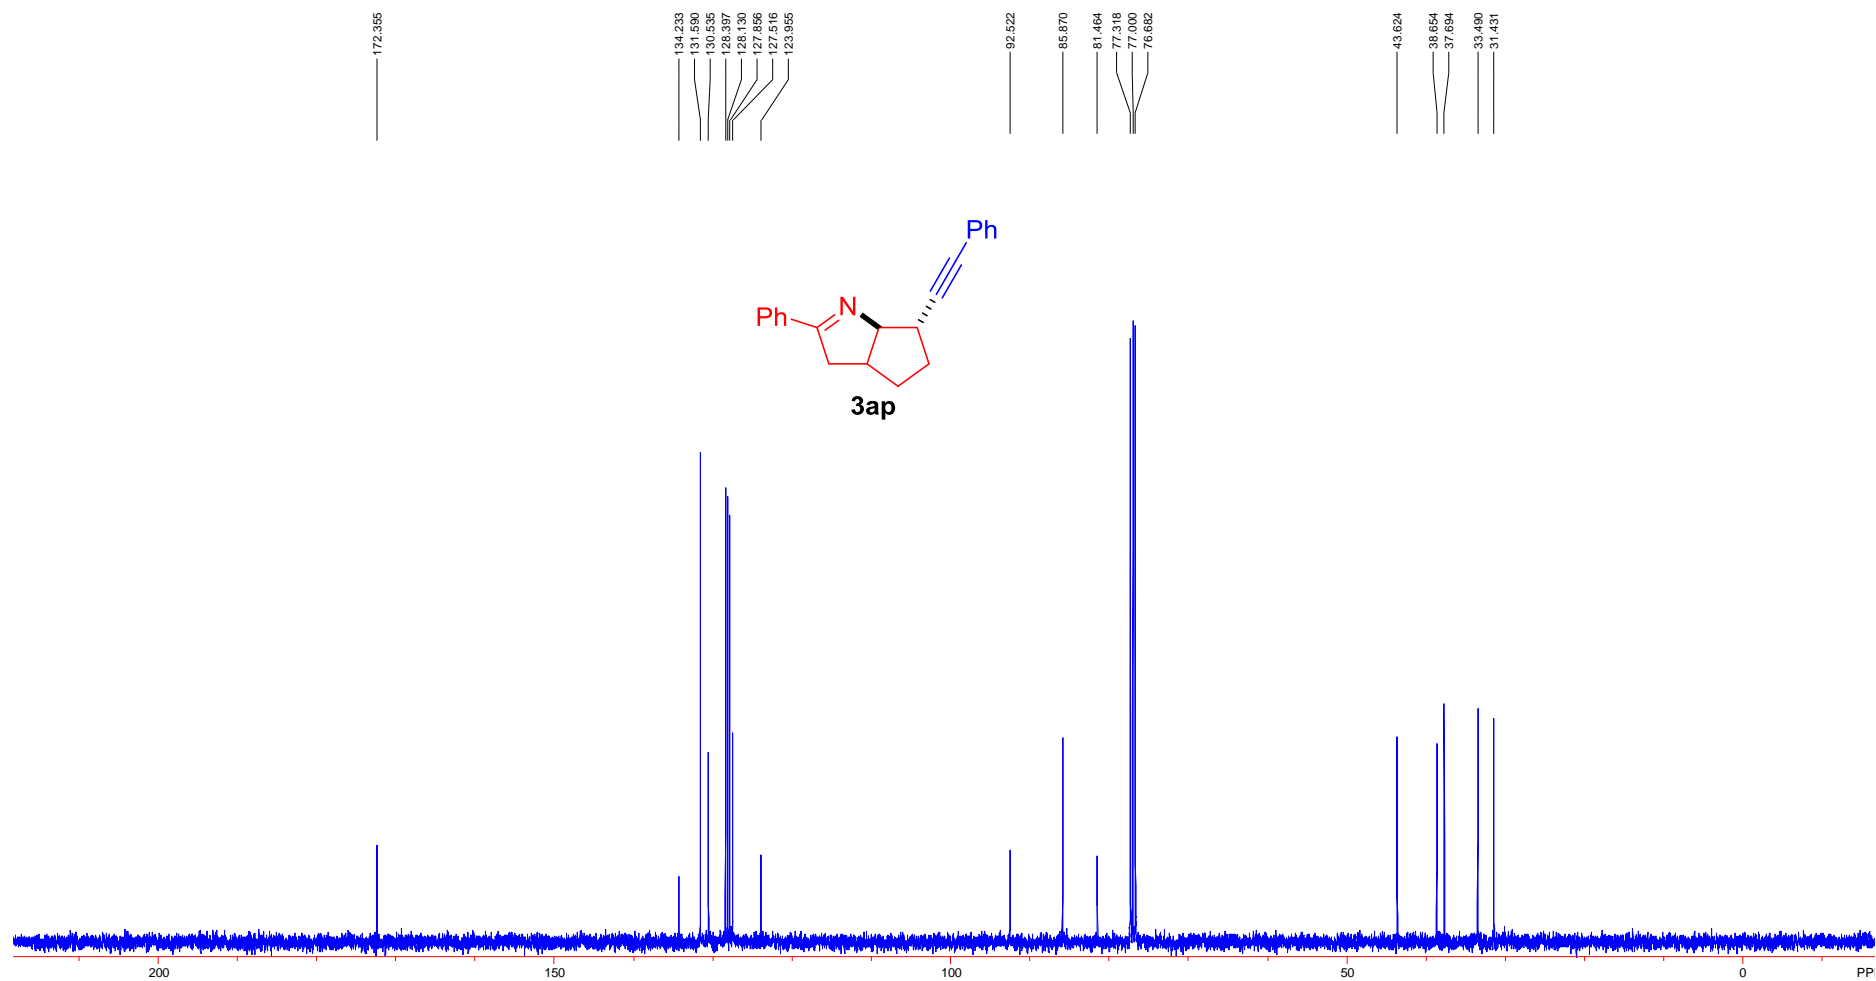

$^1\text{H}$ - $^1\text{H}$  COSY (600 MHz,  $\text{CDCl}_3$ )

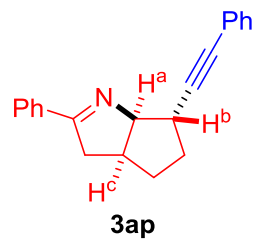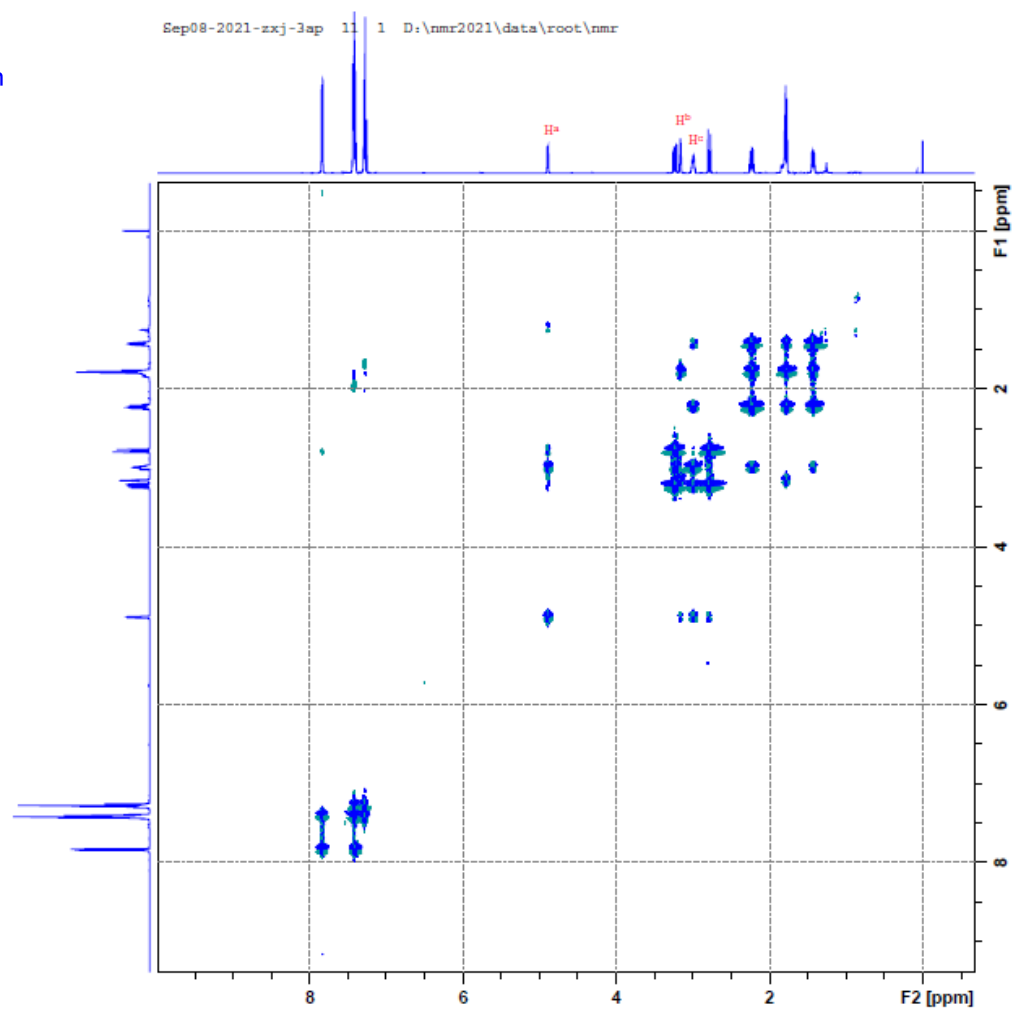

NOESY-2D  $^1\text{H}$  NMR (600 MHz,  $\text{CDCl}_3$ )

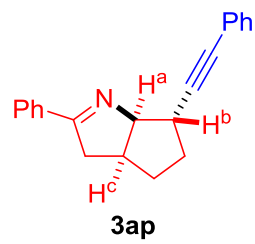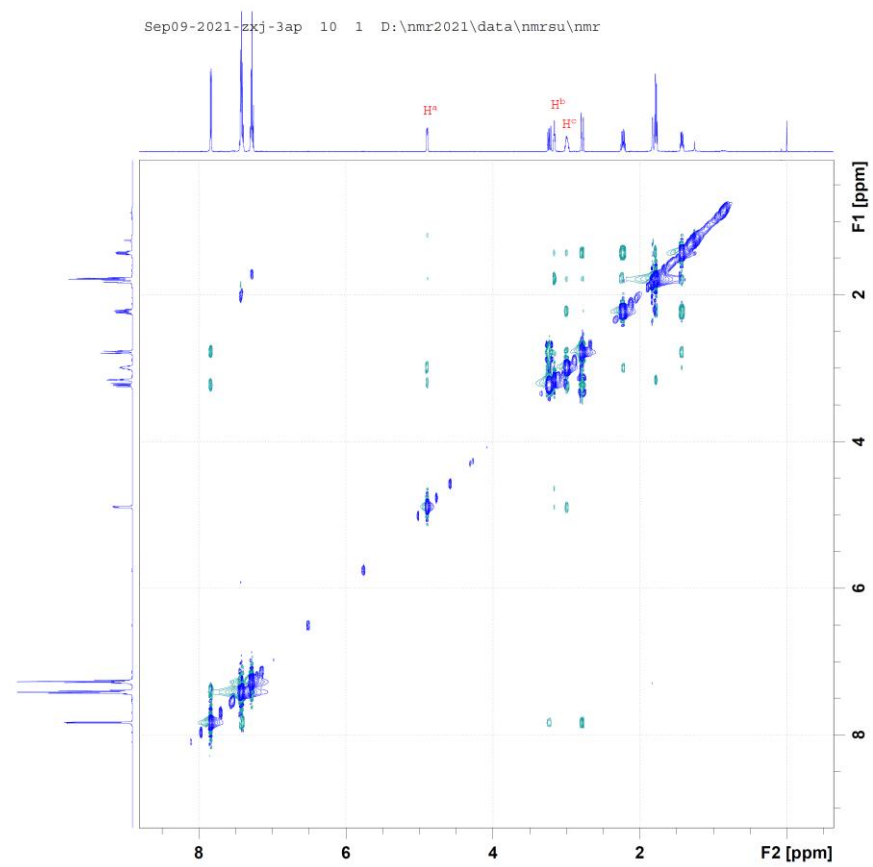

NOESY-1D  $^1\text{H}$  NMR (400 MHz,  $\text{CDCl}_3$ )

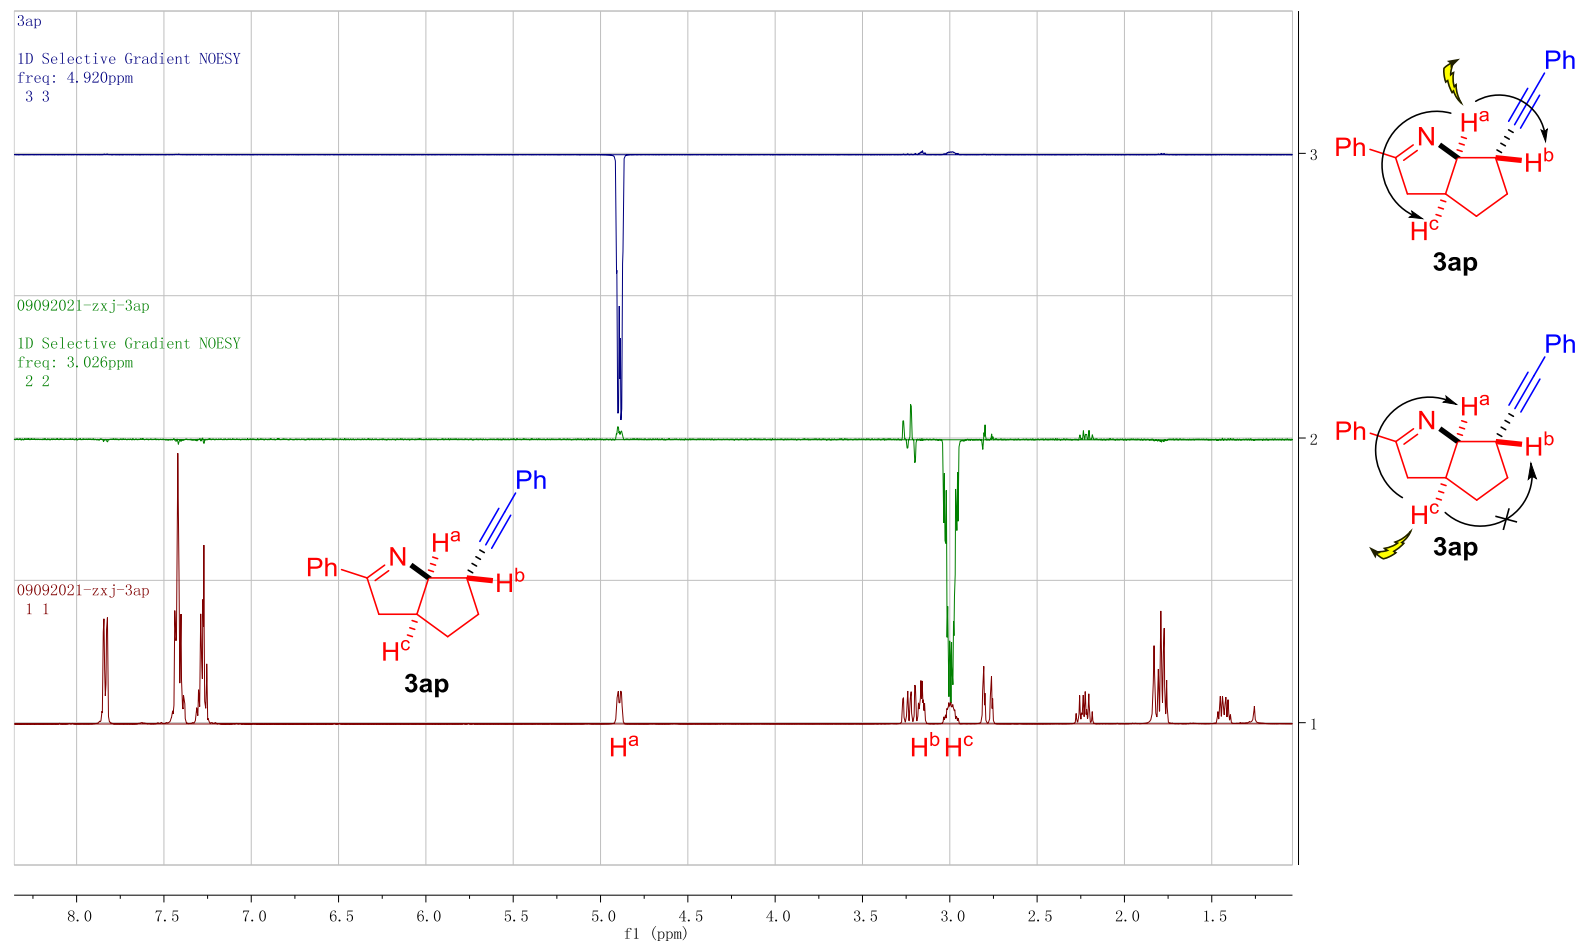



$^1\text{H}$  NMR(600 MHz,  $\text{CDCl}_3$ )

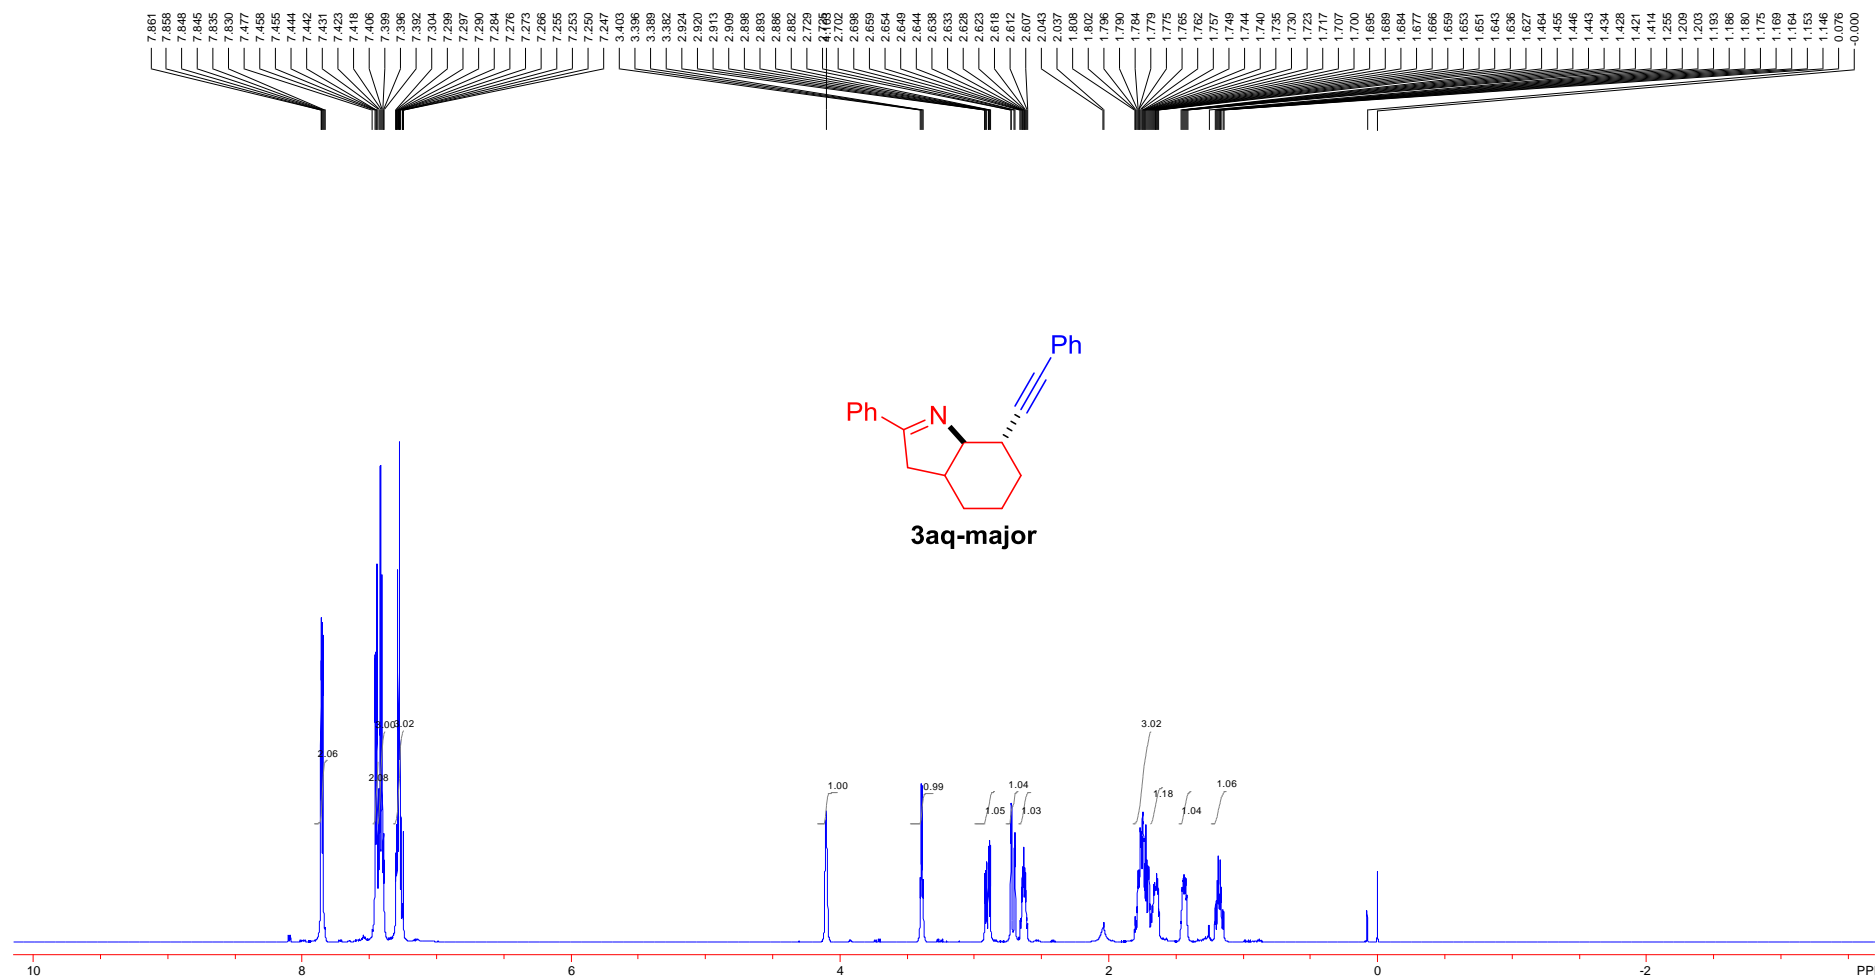

$^{13}\text{C}$  NMR (100 MHz,  $\text{CDCl}_3$ )

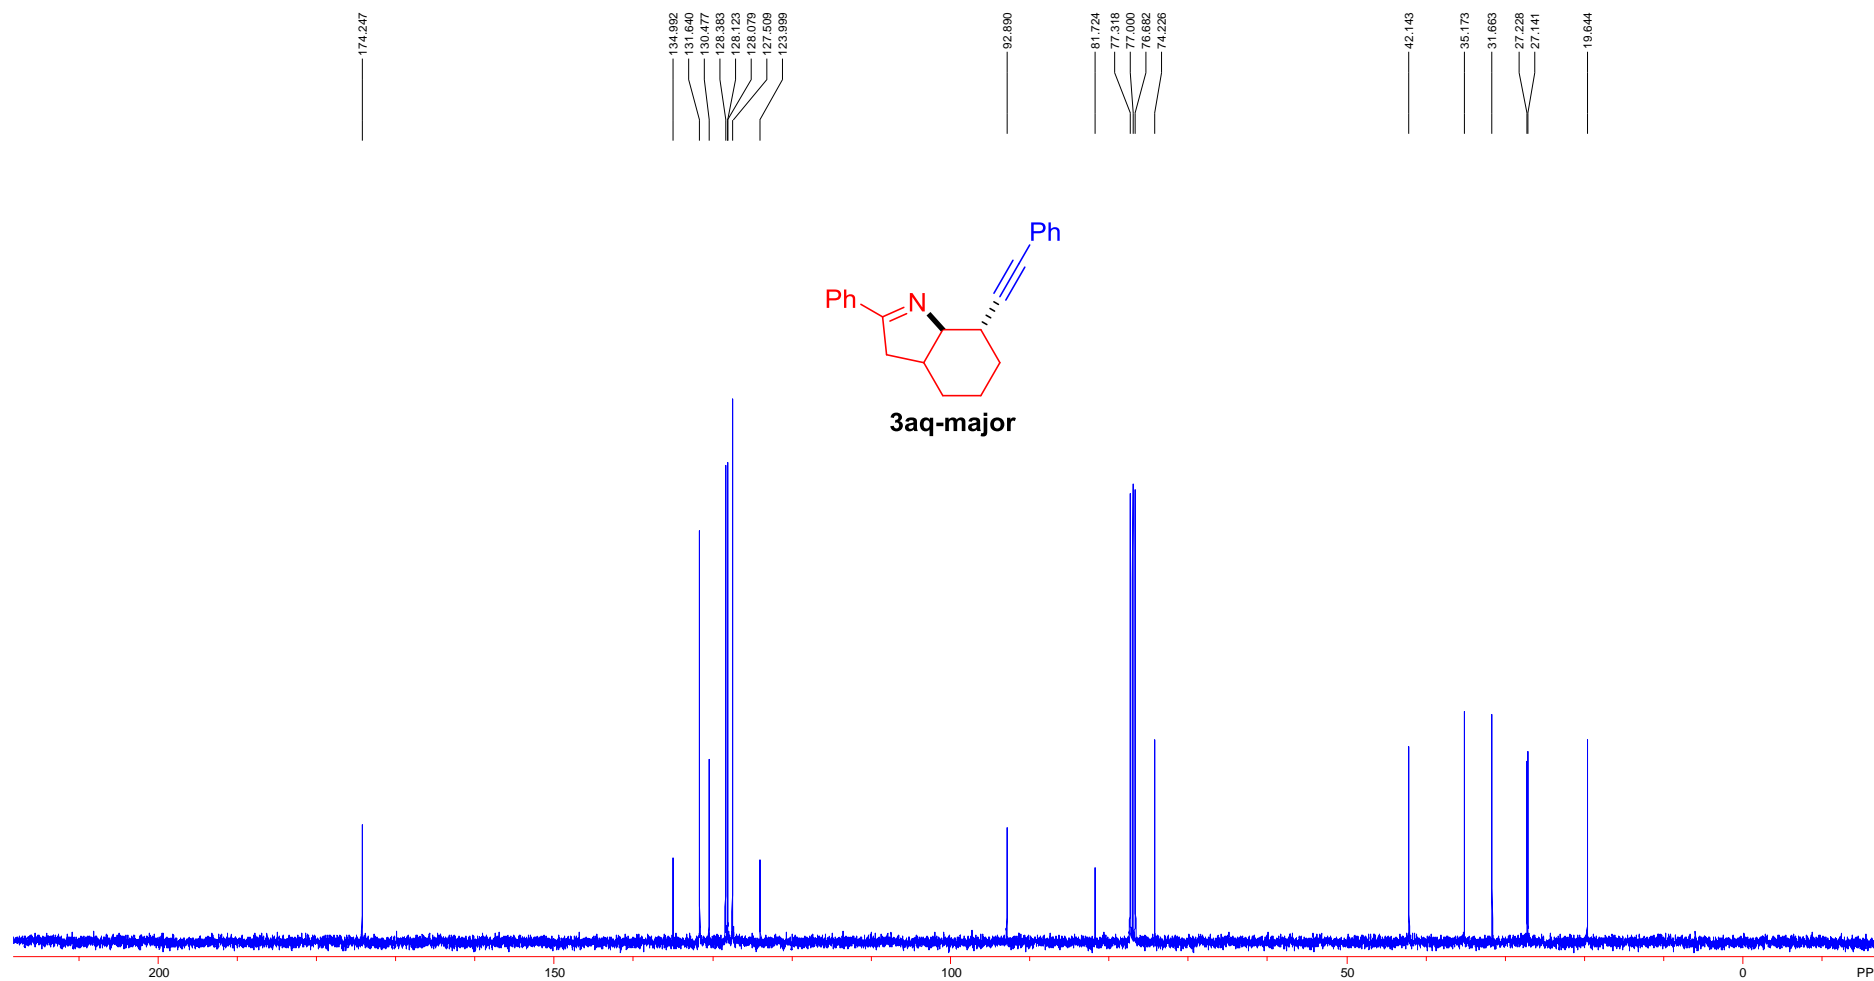

$^1\text{H}$ - $^1\text{H}$  COSY (600 MHz,  $\text{CDCl}_3$ )

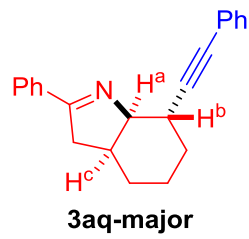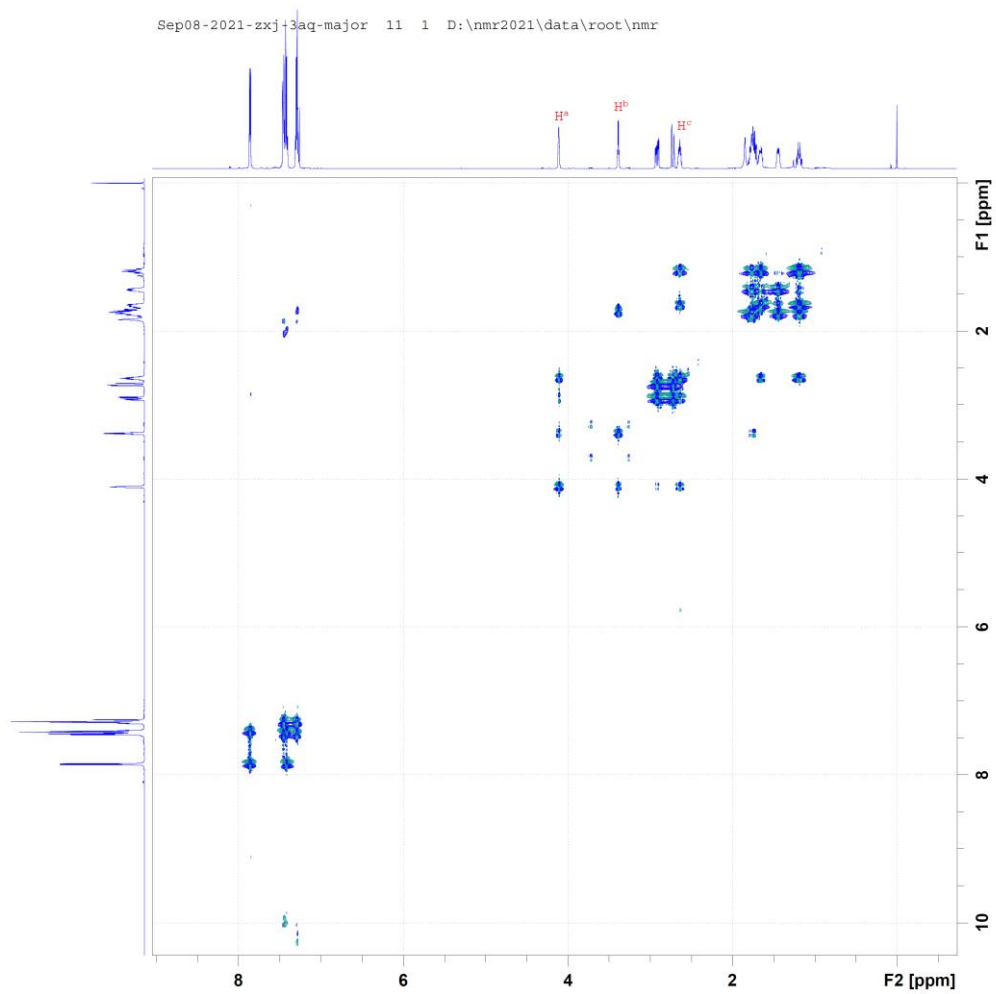

NOESY-2D  $^1\text{H}$  NMR (400 MHz,  $\text{CDCl}_3$ )

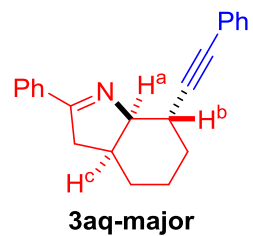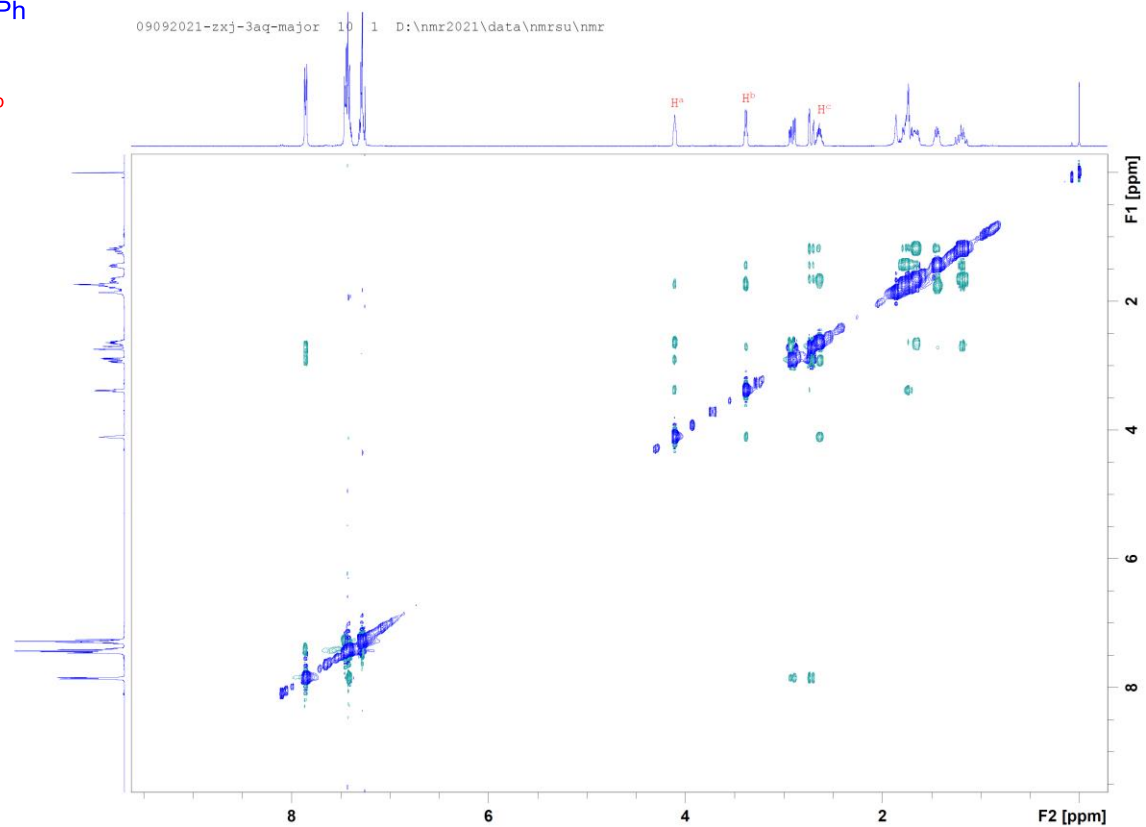

$^1\text{H}$  NMR(400 MHz,  $\text{CDCl}_3$ )

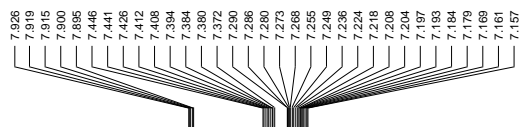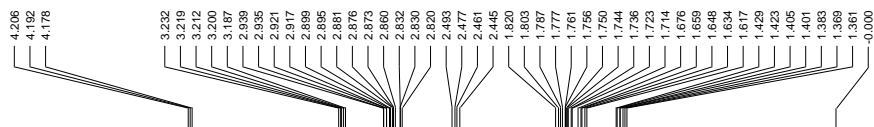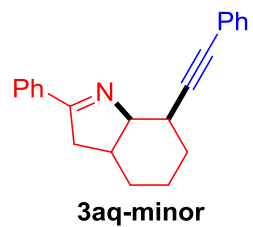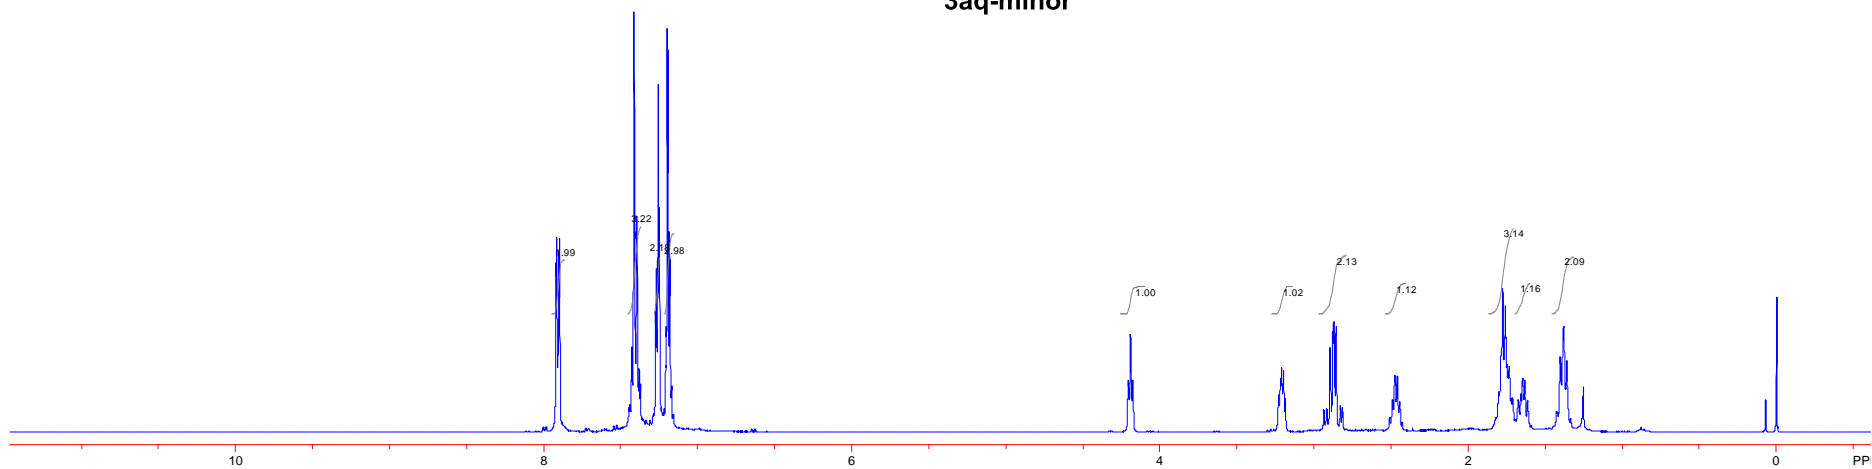

$^{13}\text{C}$  NMR (100 MHz,  $\text{CDCl}_3$ )

174.981

135.048  
131.617  
130.418  
128.302  
127.994  
127.753  
127.276  
124.098

92.427

82.157  
77.318  
77.000  
76.682  
72.060

41.898

37.059

32.523

28.053

26.483

21.090

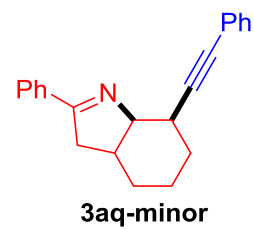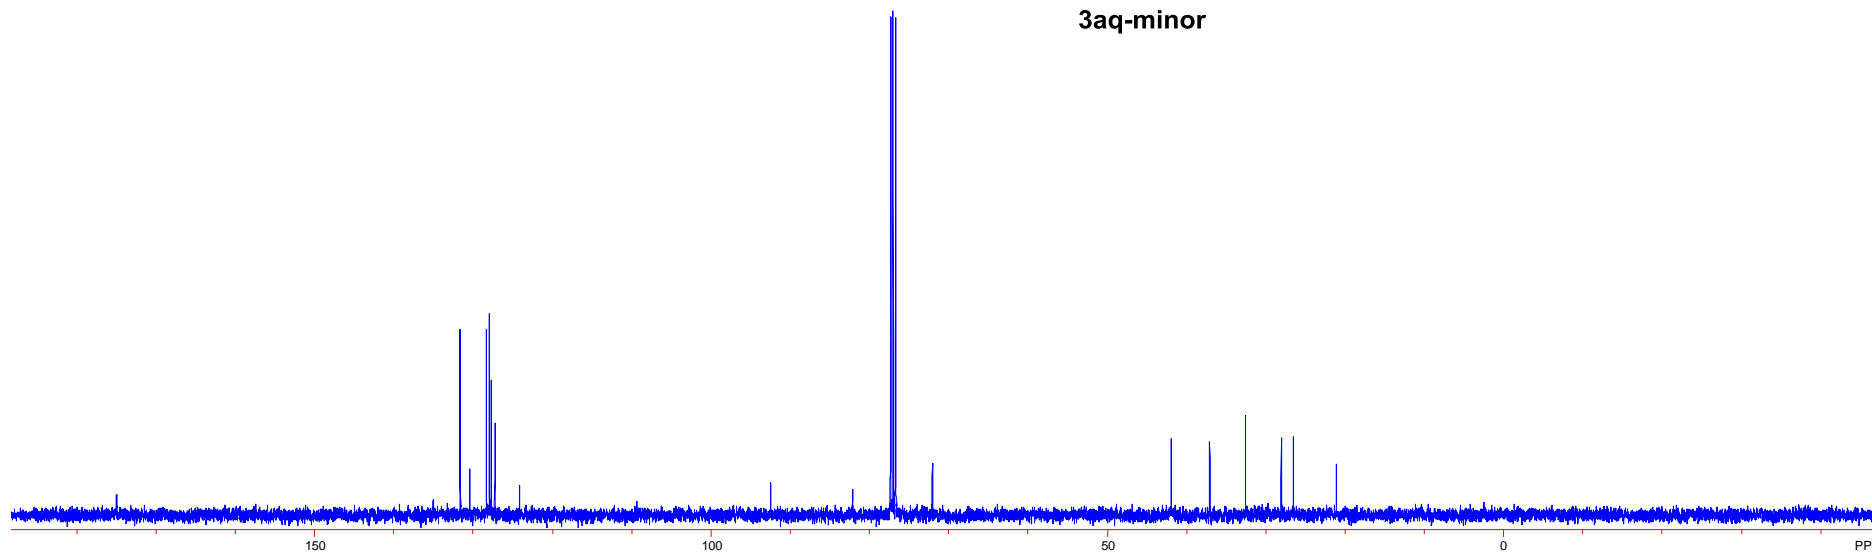

$^1\text{H}$ - $^1\text{H}$  COSY (600 MHz,  $\text{CDCl}_3$ )

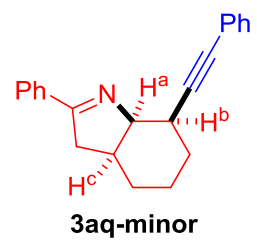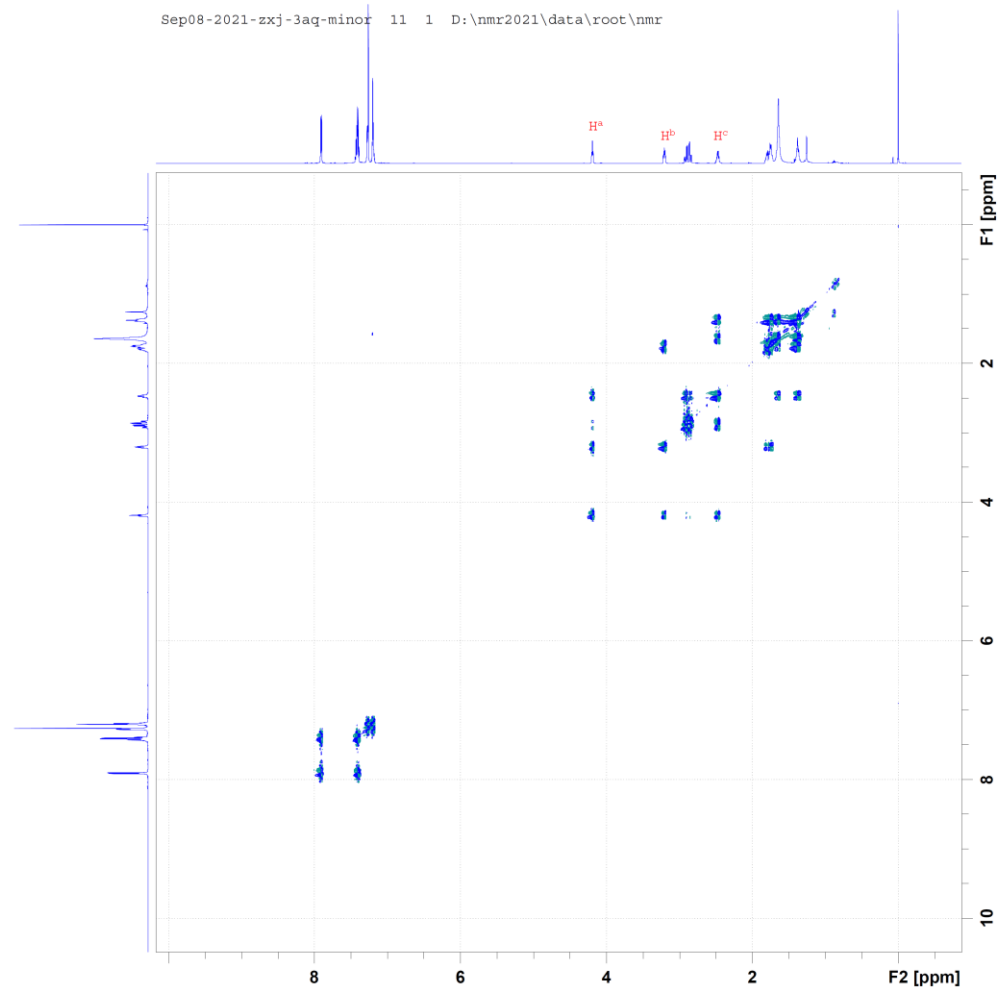

NOESY-2D  $^1\text{H}$  NMR (400 MHz,  $\text{CDCl}_3$ )

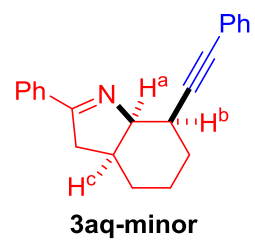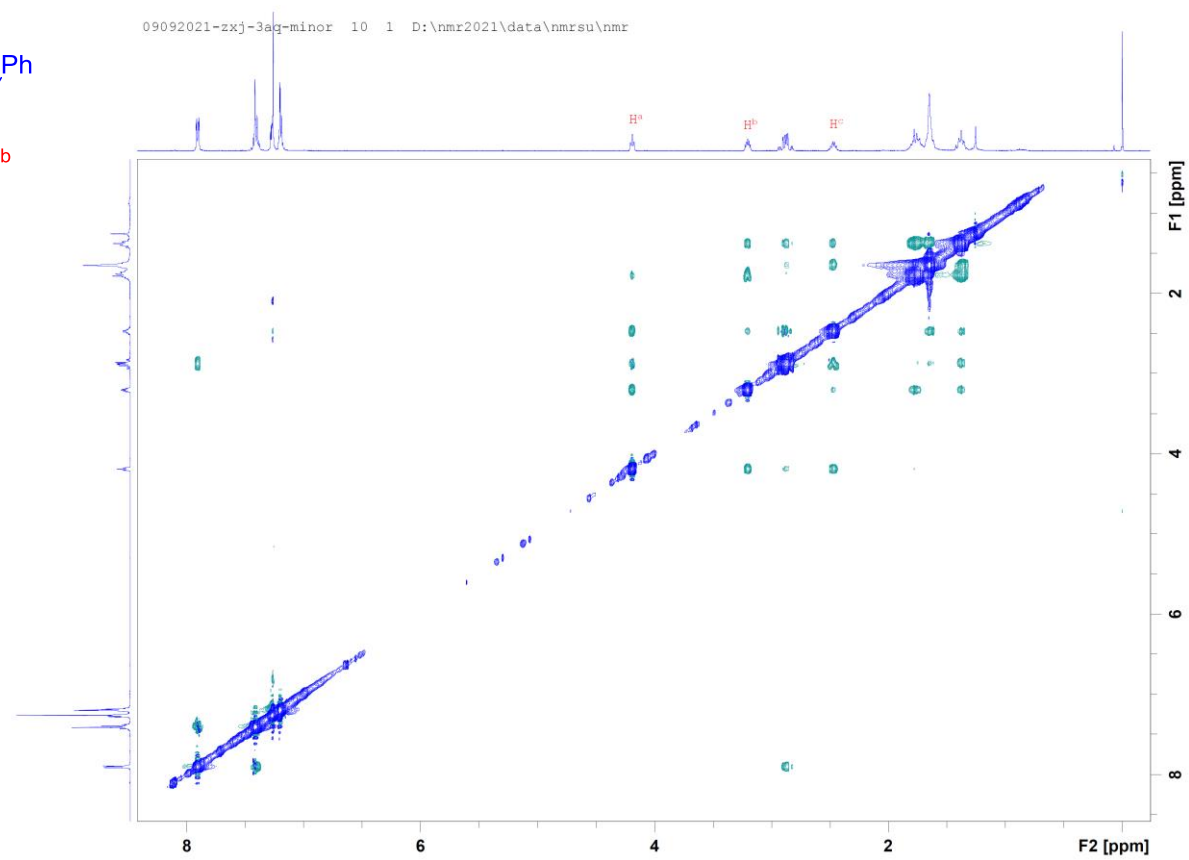



$^1\text{H}$  NMR(600 MHz,  $\text{CDCl}_3$ )

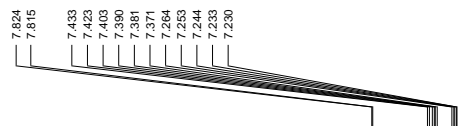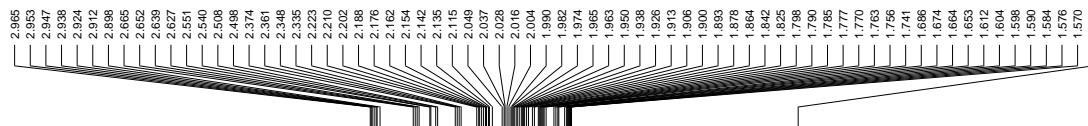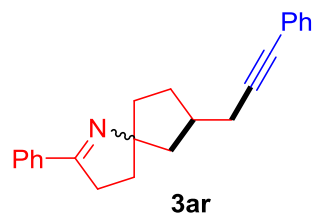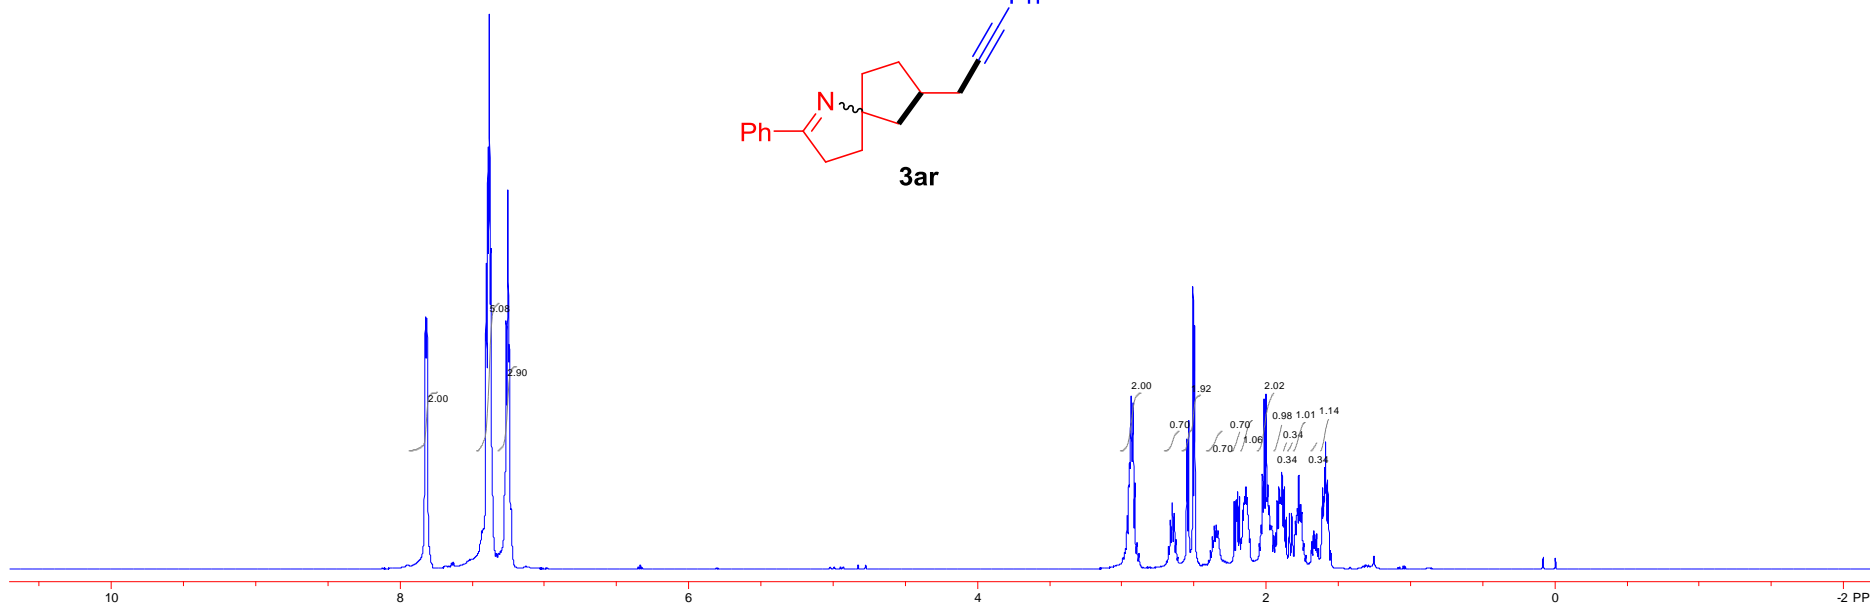

$^{13}\text{C}$  NMR (151 MHz,  $\text{CDCl}_3$ )

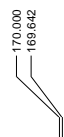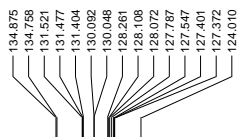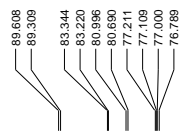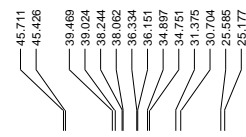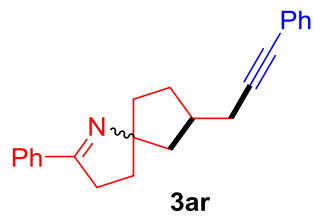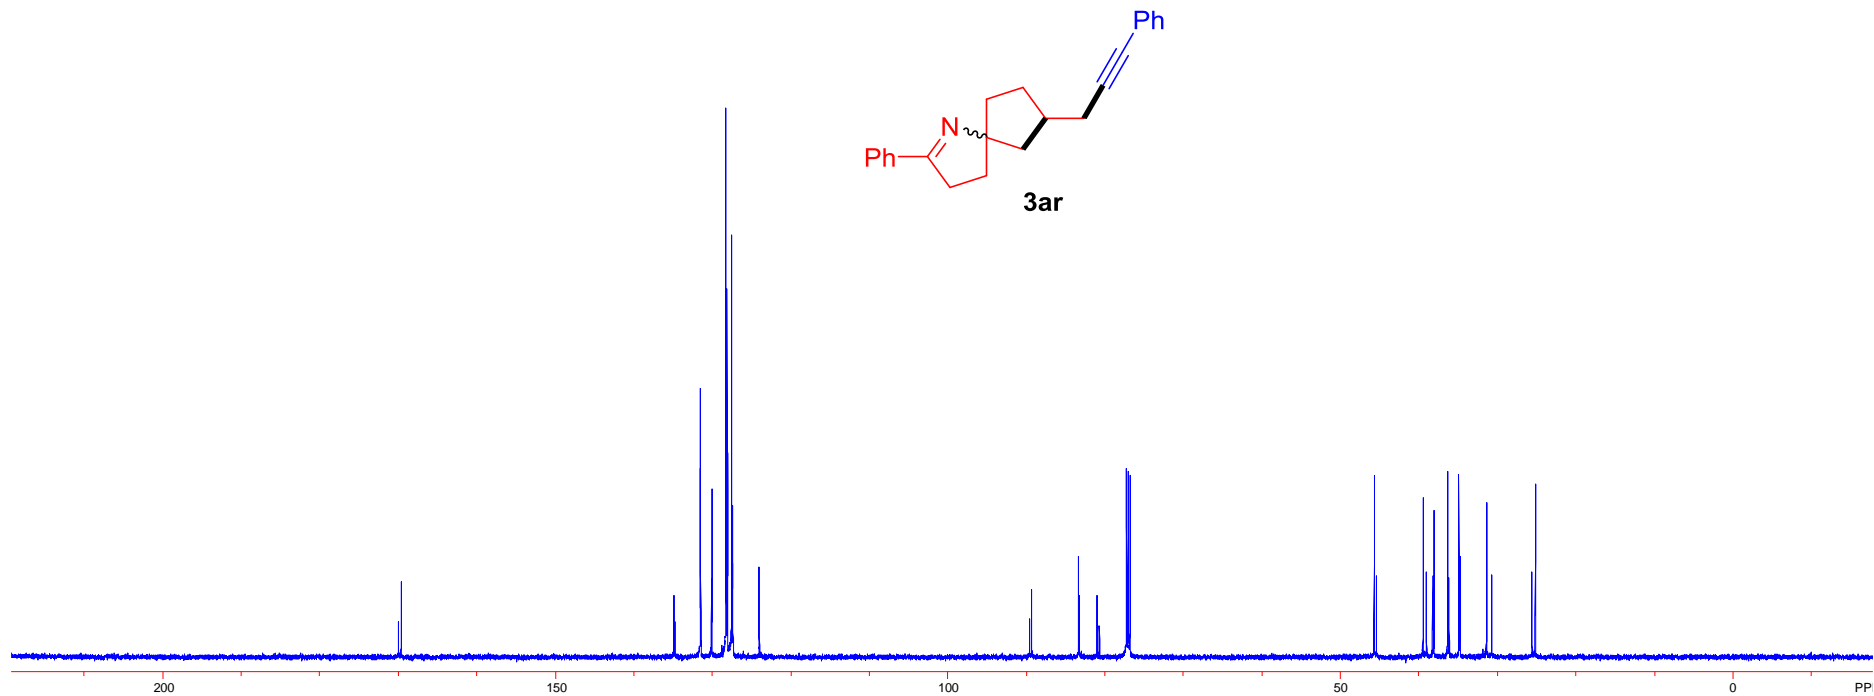

$^1\text{H}$  NMR(600 MHz,  $\text{CDCl}_3$ )

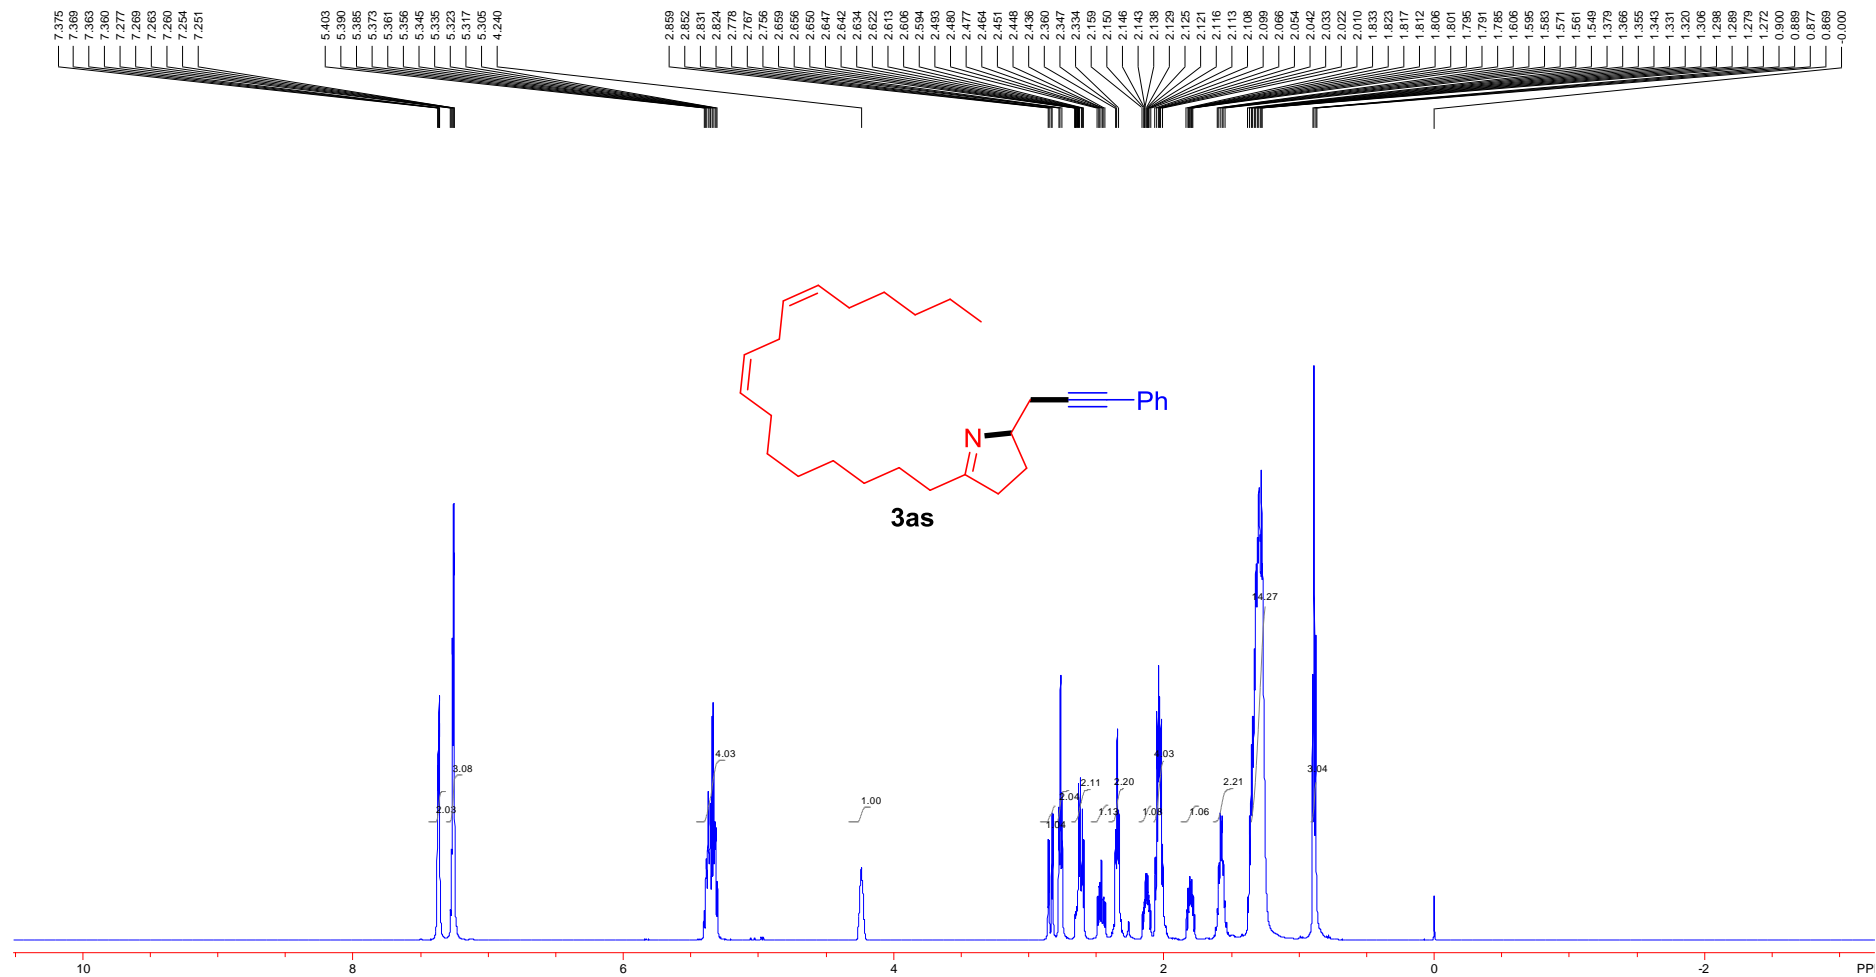

$^{13}\text{C}$  NMR (151 MHz,  $\text{CDCl}_3$ )

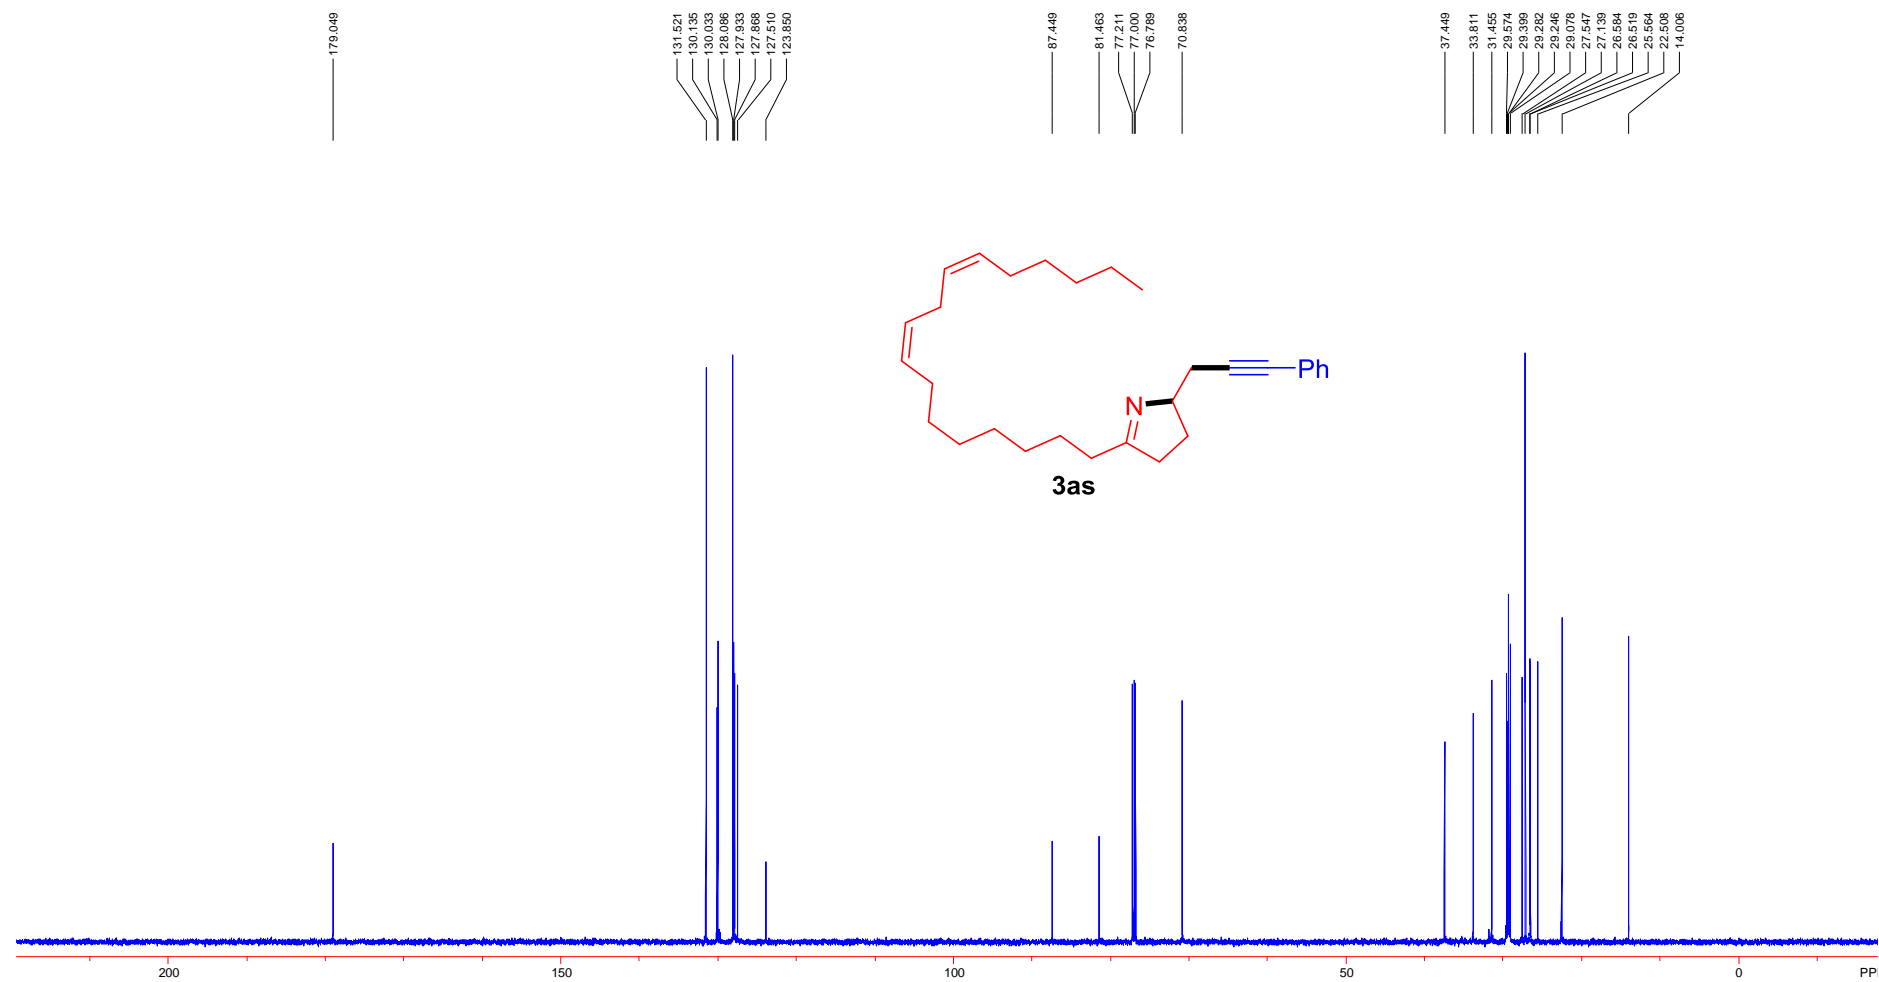

$^1\text{H}$  NMR(400 MHz,  $\text{CDCl}_3$ )

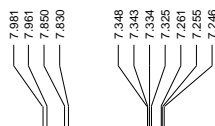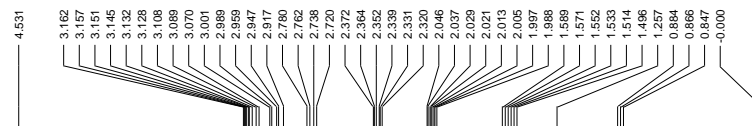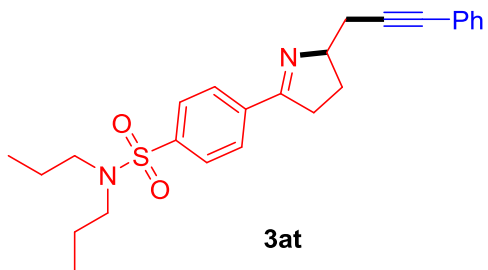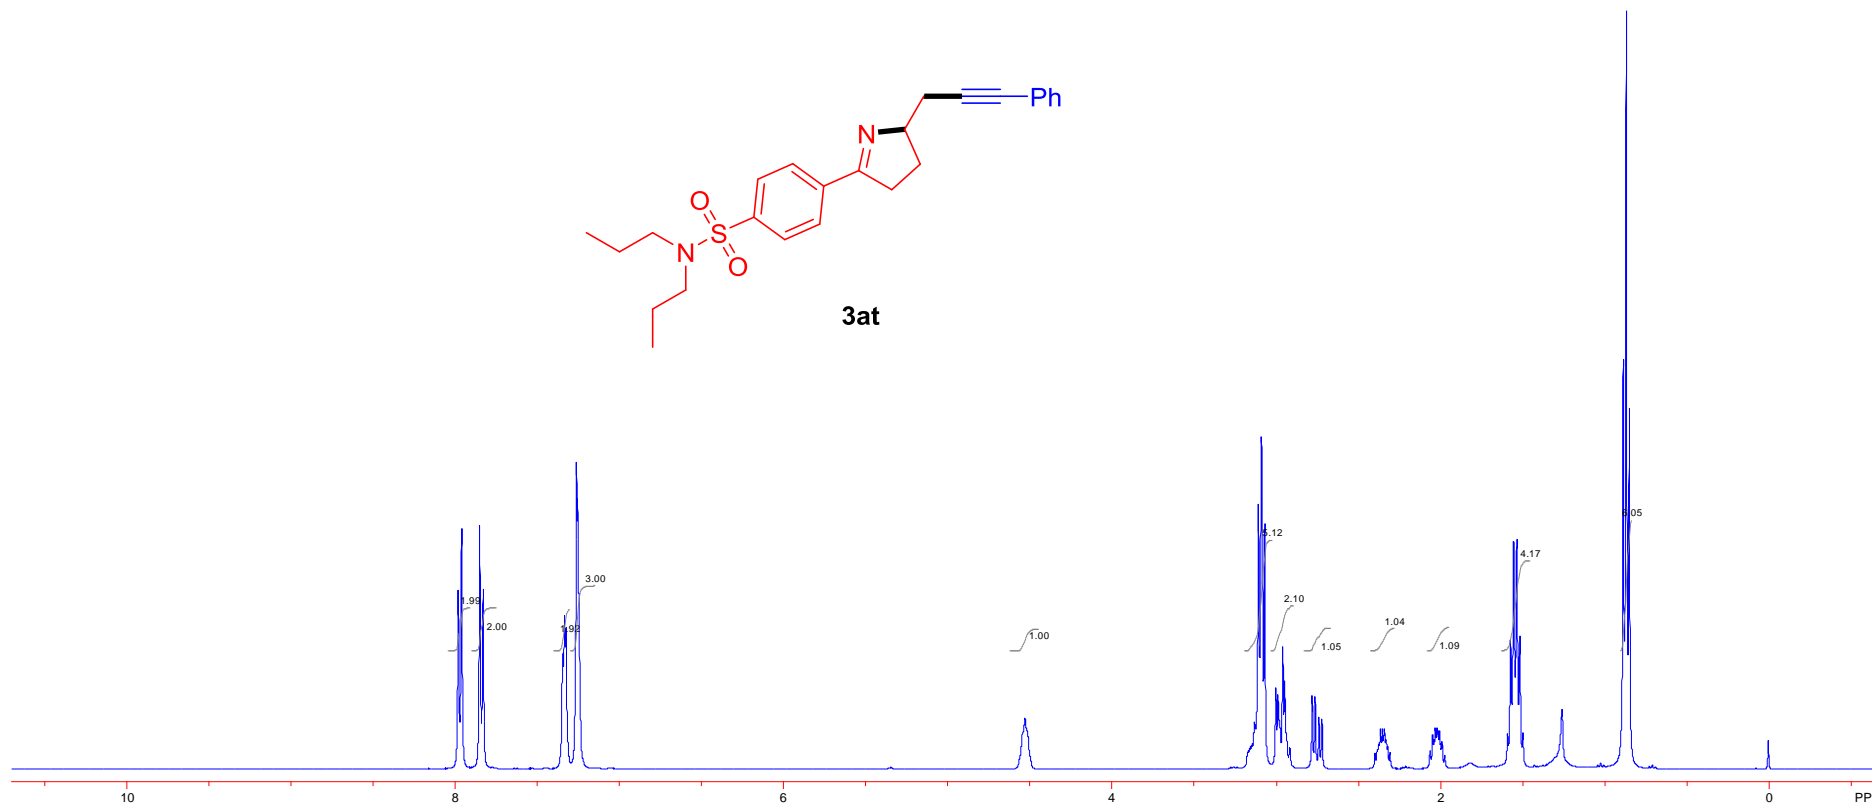

$^{13}\text{C}$  NMR (100 MHz,  $\text{CDCl}_3$ )

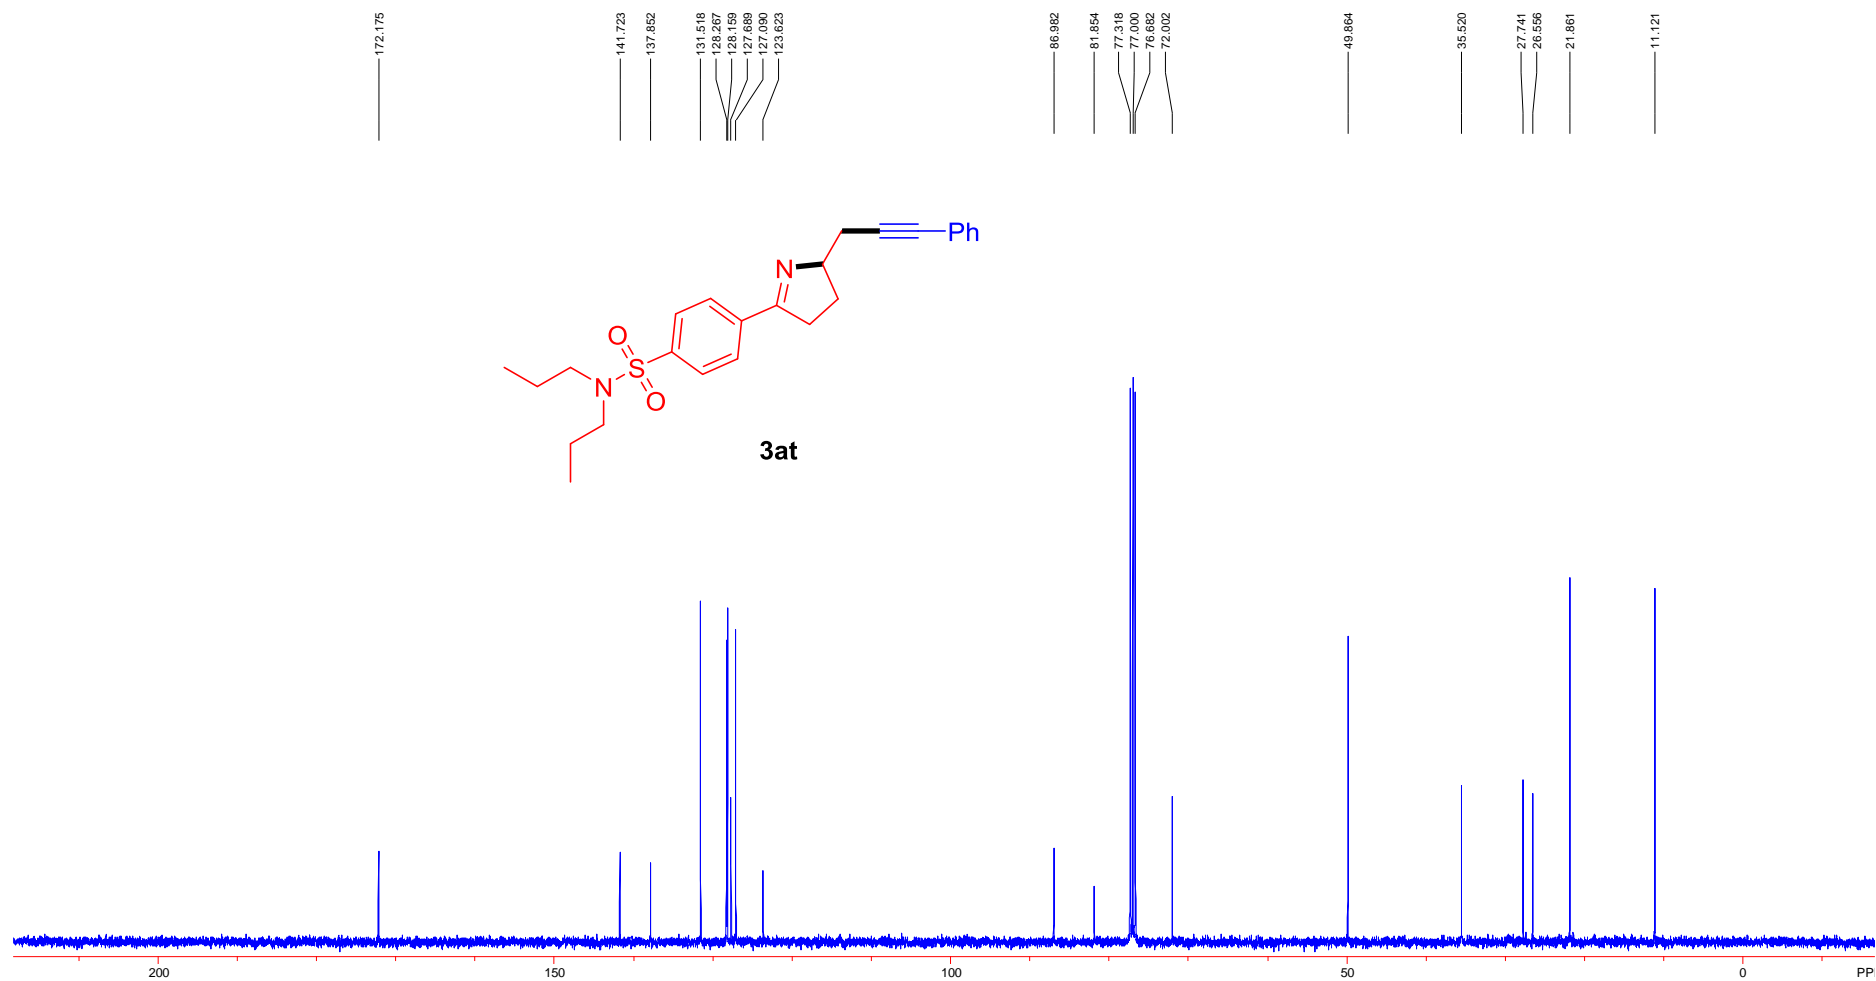

$^1\text{H}$  NMR(600 MHz,  $\text{CDCl}_3$ )

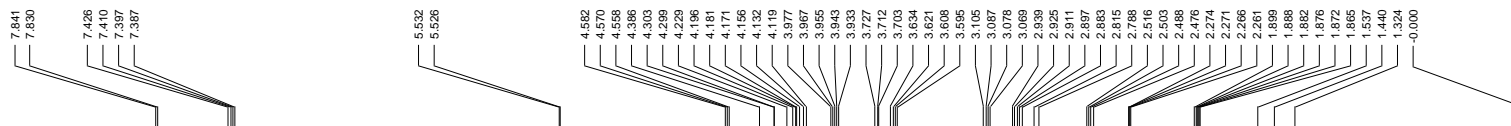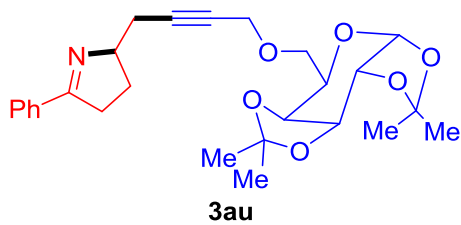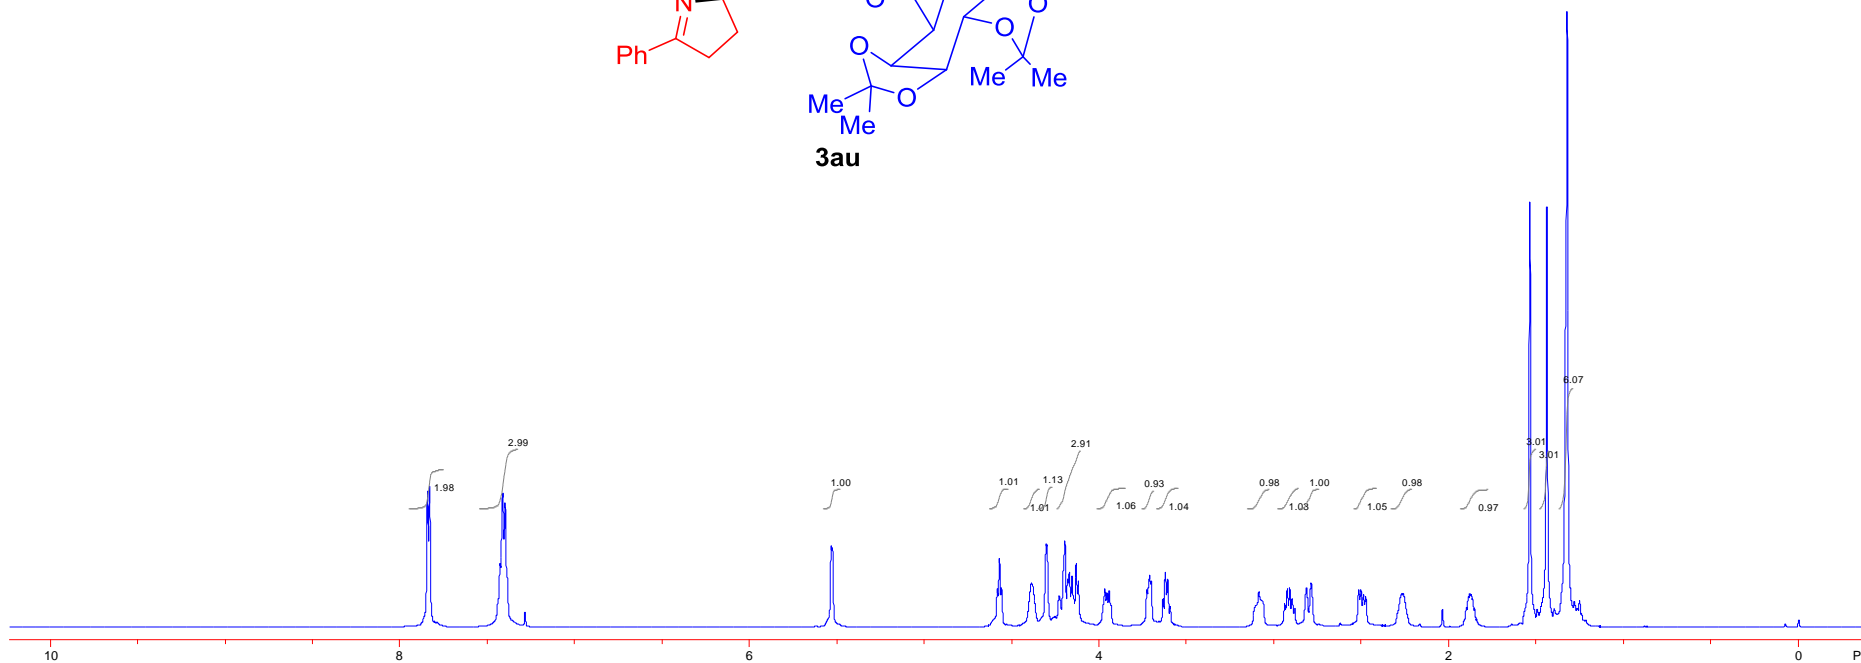

$^{13}\text{C}$  NMR (151 MHz,  $\text{CDCl}_3$ )

173.274  
173.269

134.255  
130.427  
130.405  
128.327  
128.305  
127.685

109.135  
109.120  
108.442  
108.420

96.243

84.241  
77.211  
77.000  
76.986  
76.980  
71.480  
71.043  
71.021  
70.561  
70.394  
68.206  
68.177  
66.558  
66.529  
58.873  
58.858

35.203  
27.671  
27.613  
25.957  
25.884  
25.870  
24.820  
24.397  
24.360

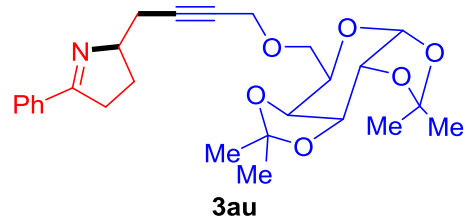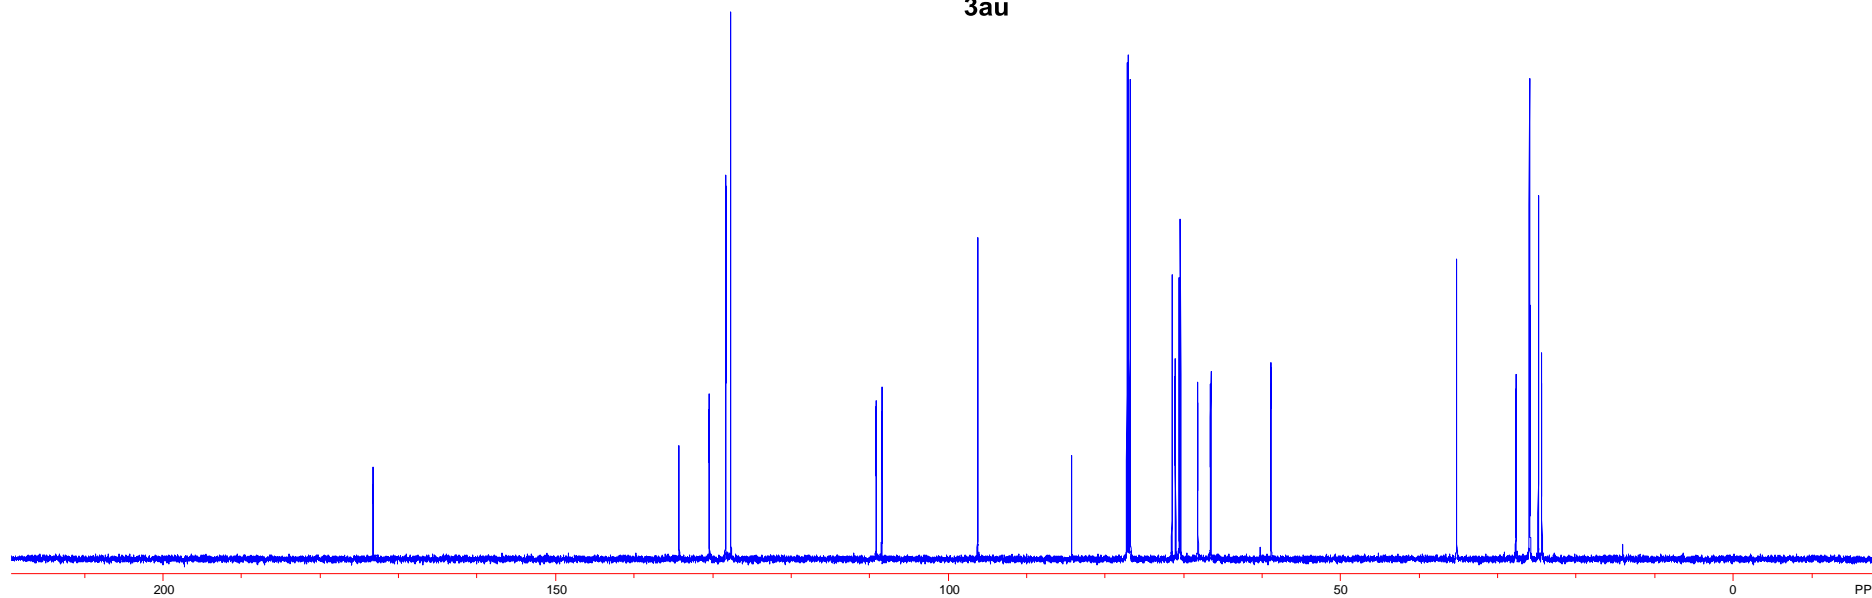



$^1\text{H}$  NMR(400 MHz,  $\text{CDCl}_3$ )

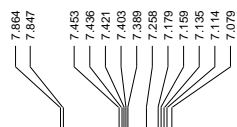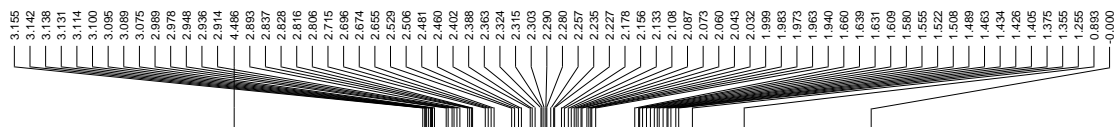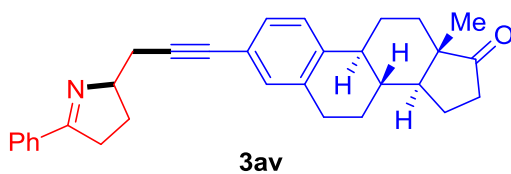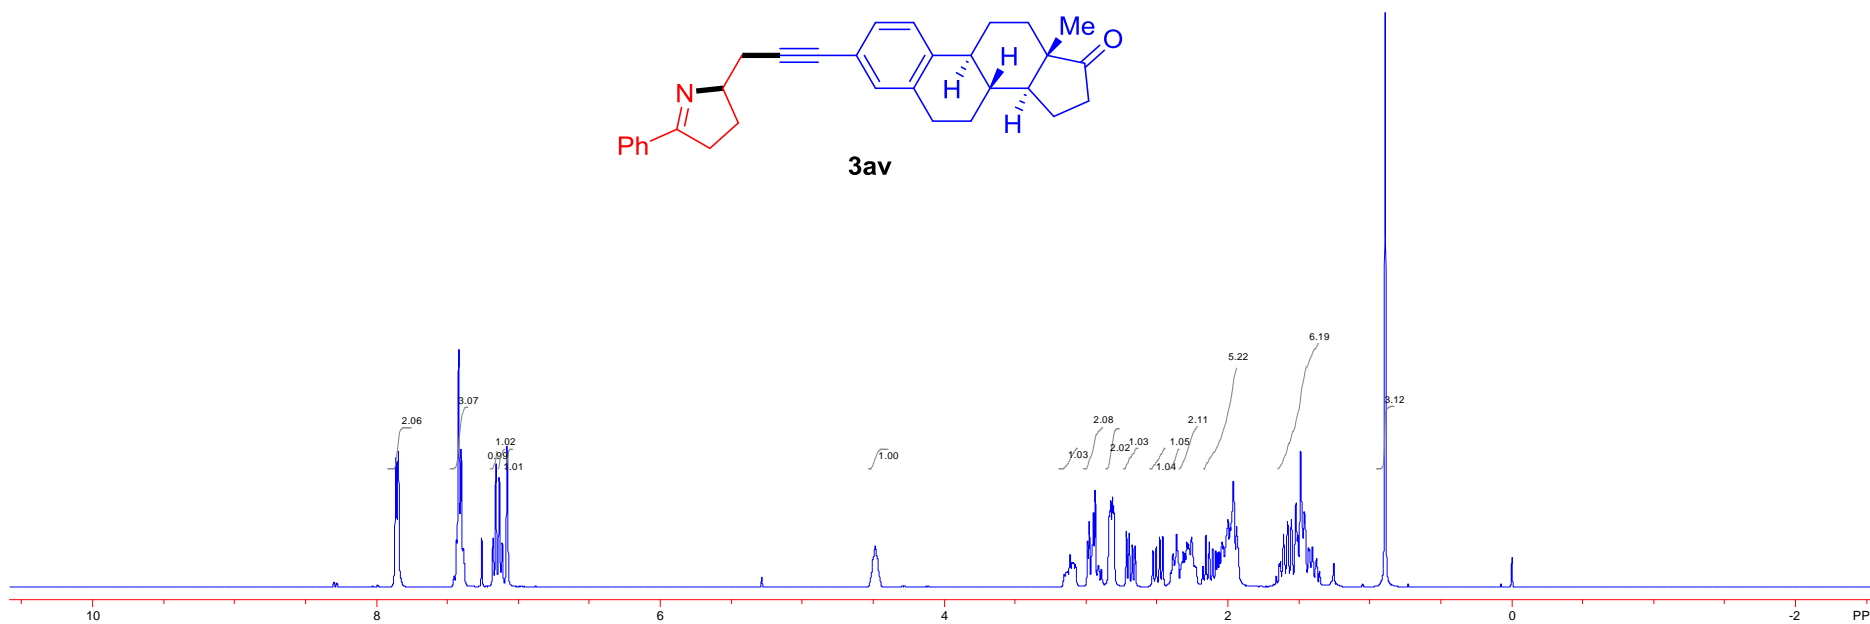

$^{13}\text{C}$  NMR (151 MHz,  $\text{CDCl}_3$ )

220.643

173.348

139.426

136.305

134.343

132.003

130.442

128.794

128.327

127.722

125.126

121.043

86.596

81.587

77.211

77.000

76.789

71.699

50.370

47.825

44.274

37.872

35.728

35.312

31.440

28.939

27.678

26.642

26.234

25.476

21.465

13.721

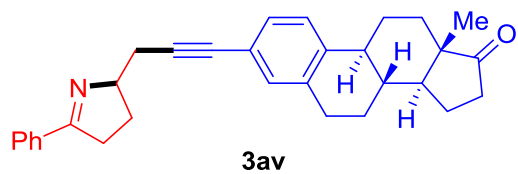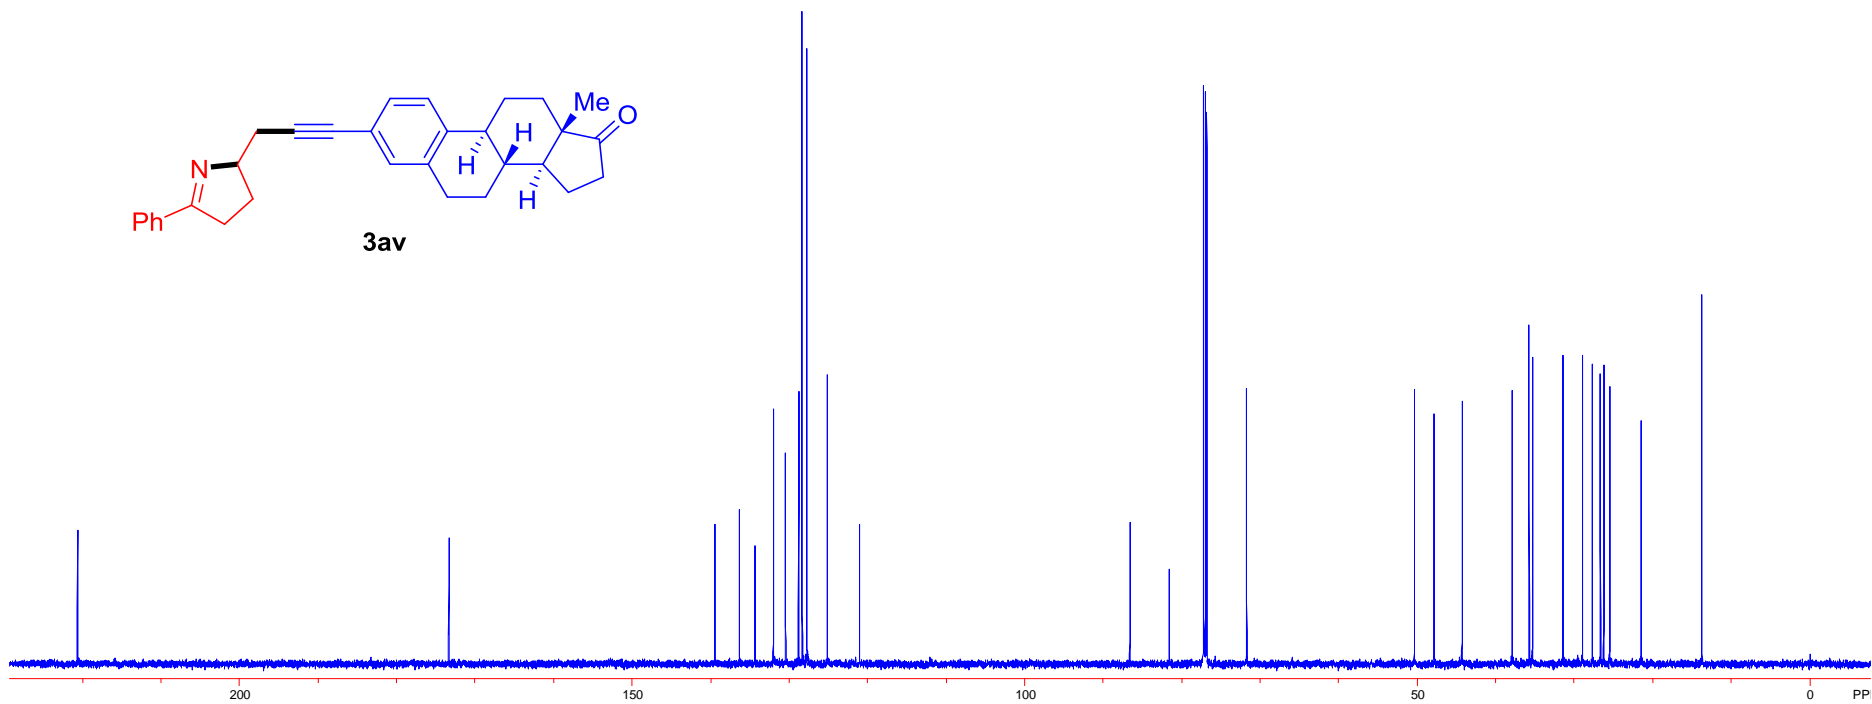

$^1\text{H}$  NMR(400 MHz,  $\text{CDCl}_3$ )

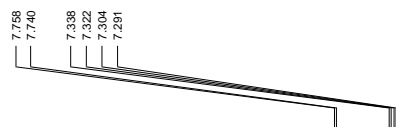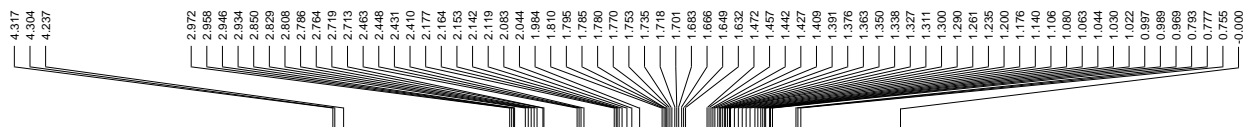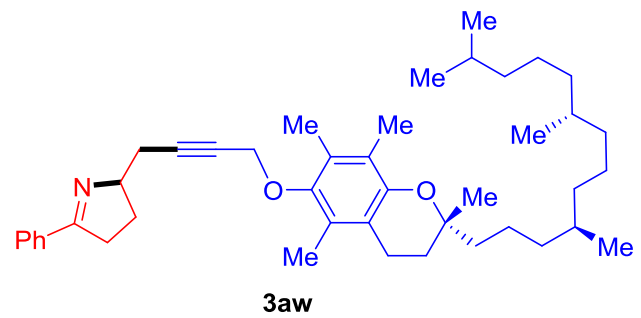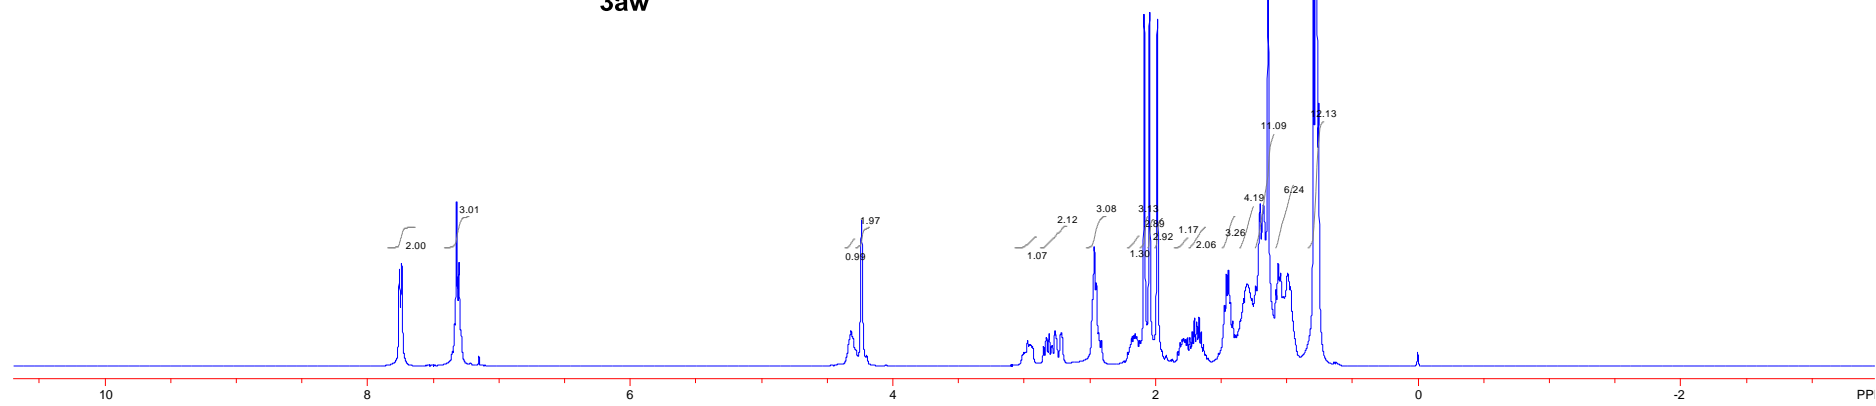

$^{13}\text{C}$  NMR (100 MHz,  $\text{CDCl}_3$ )

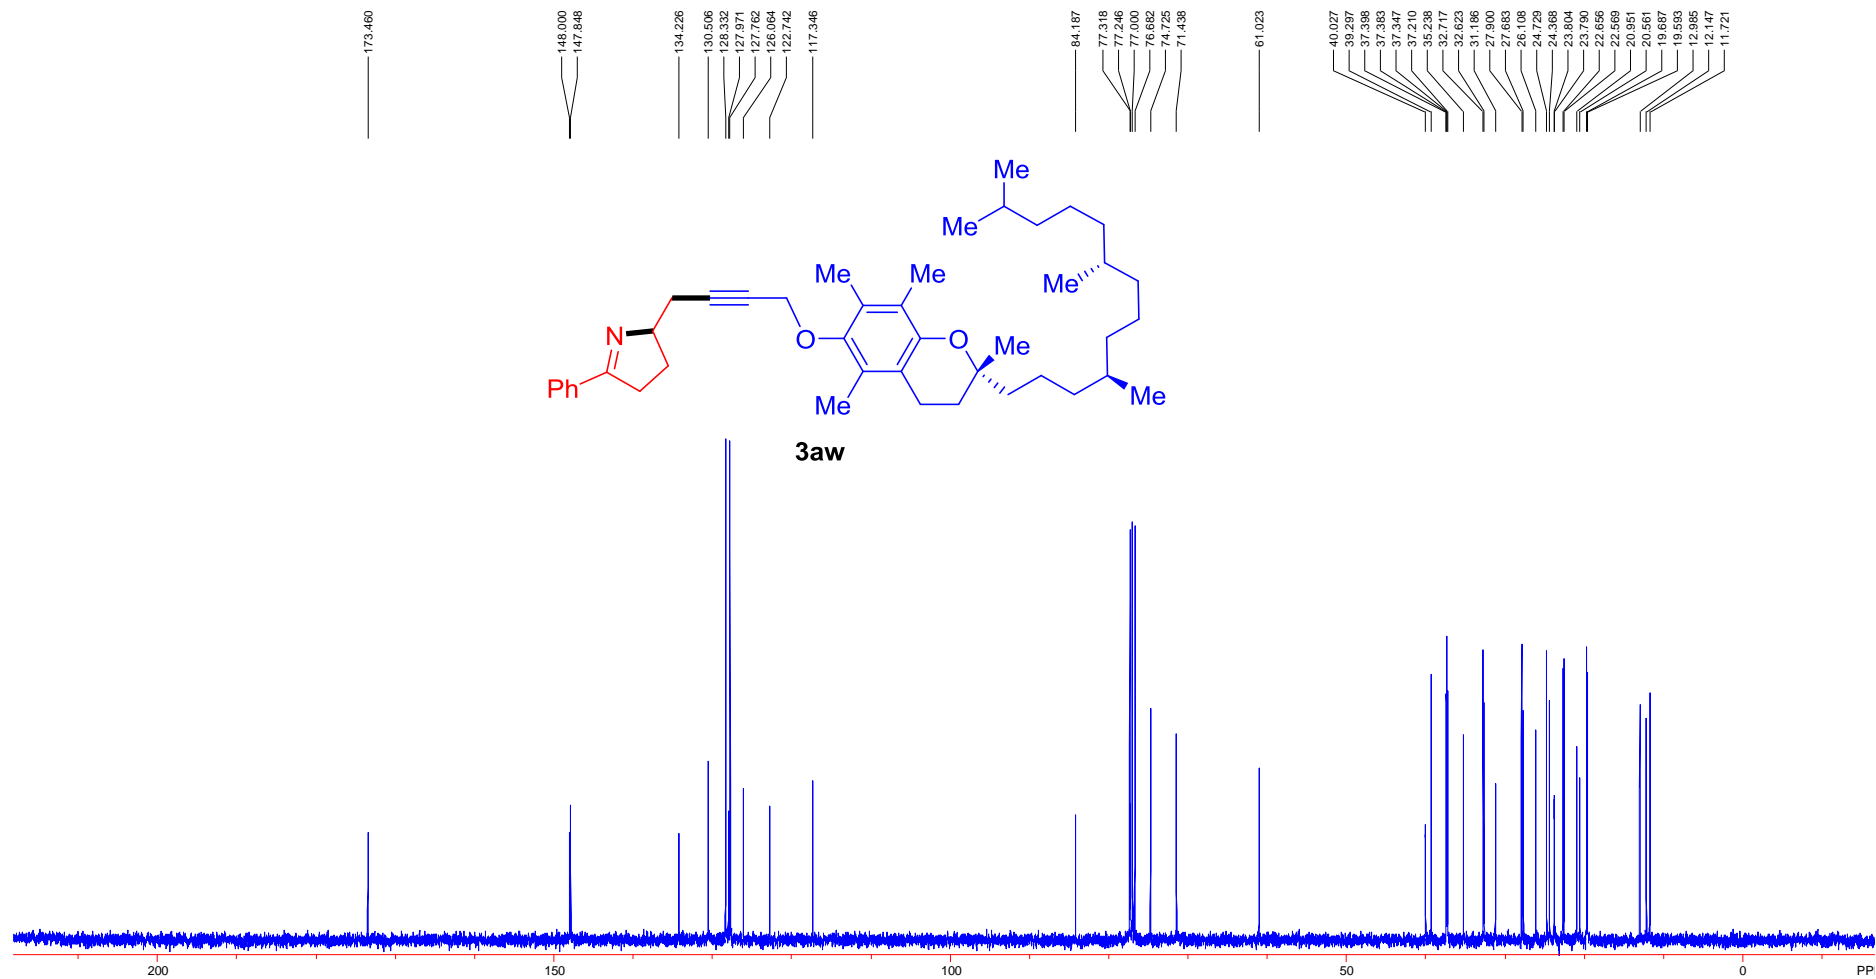

$^1\text{H}$  NMR(400 MHz,  $\text{CDCl}_3$ )

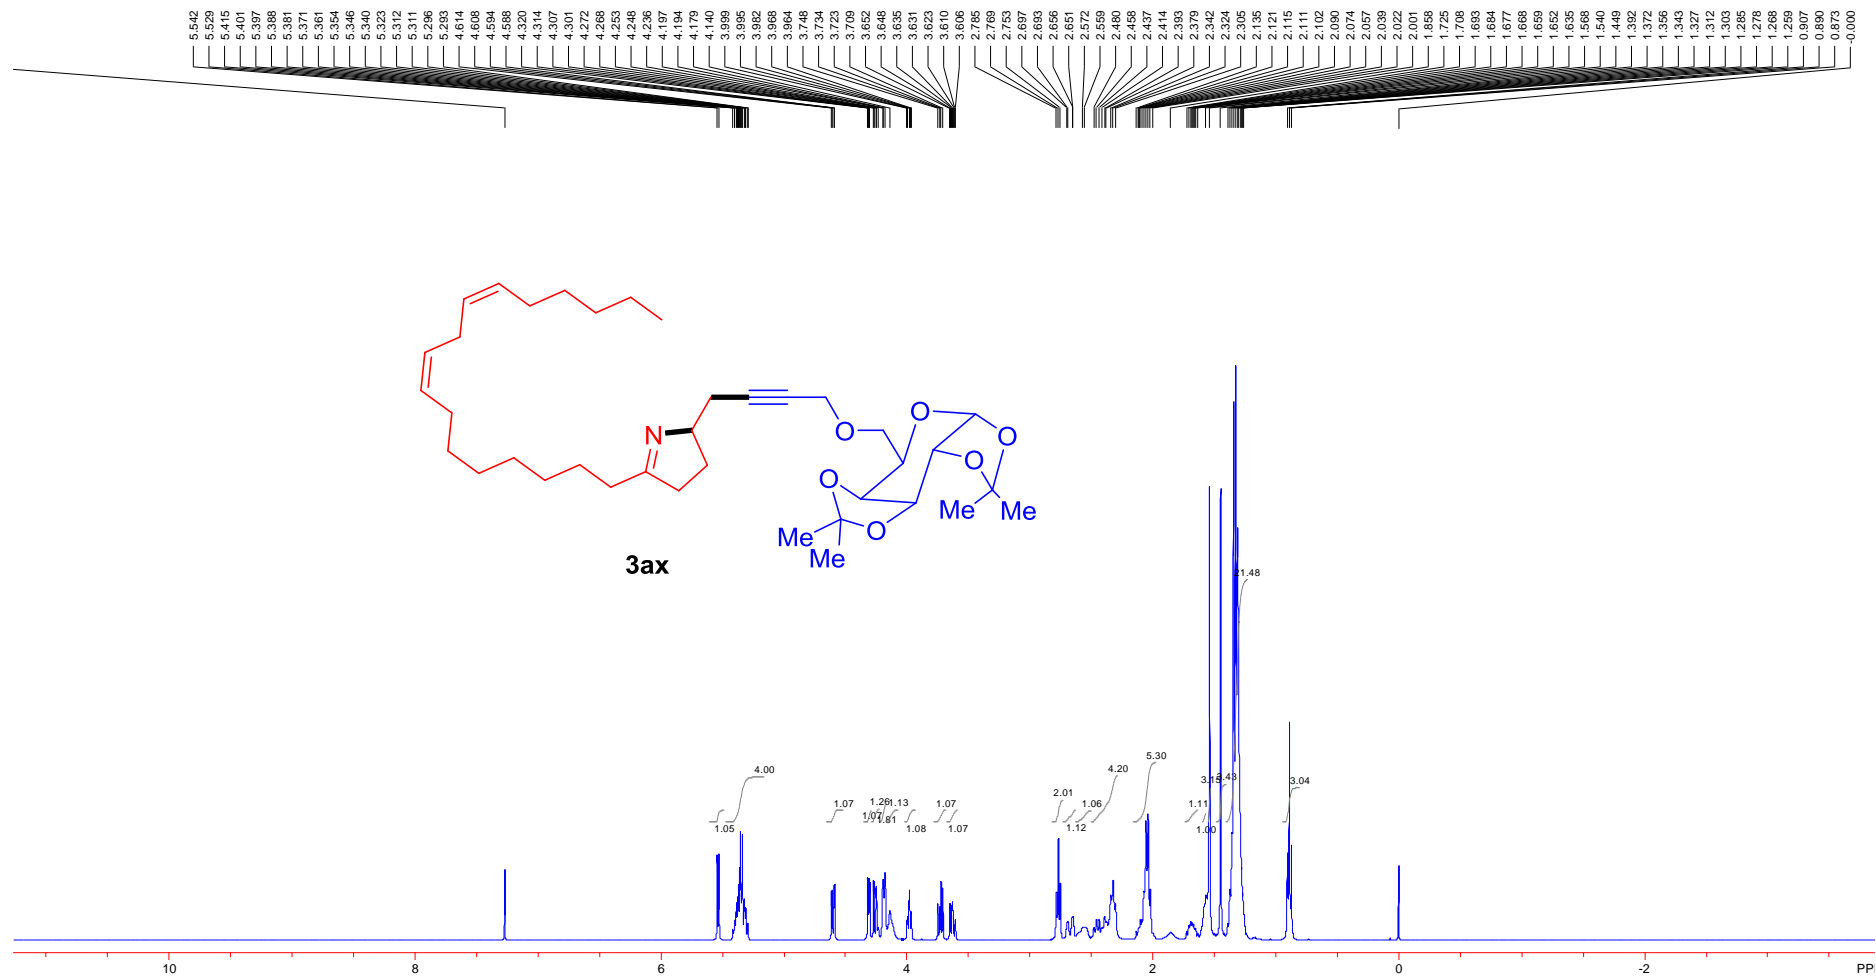

$^{13}\text{C}$  NMR (151 MHz,  $\text{CDCl}_3$ )

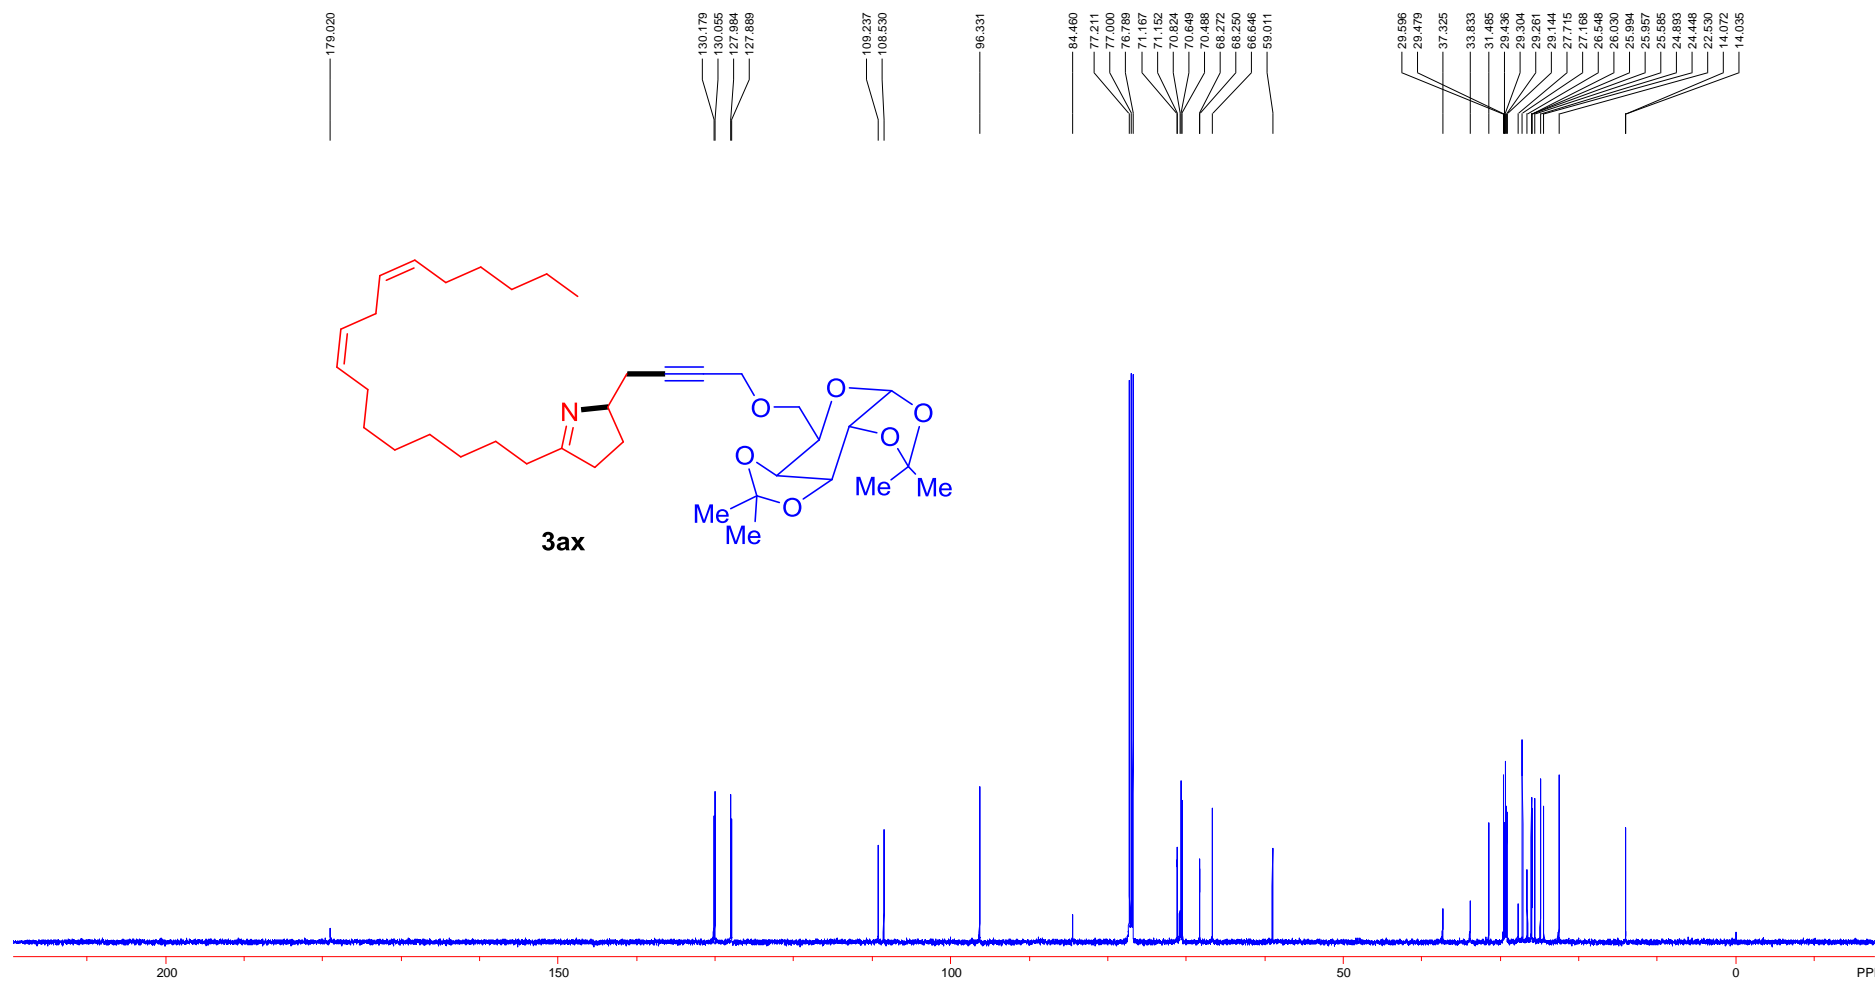

$^1\text{H}$  NMR(400 MHz,  $\text{CDCl}_3$ )

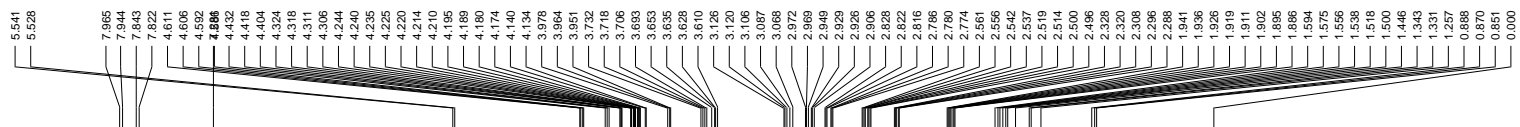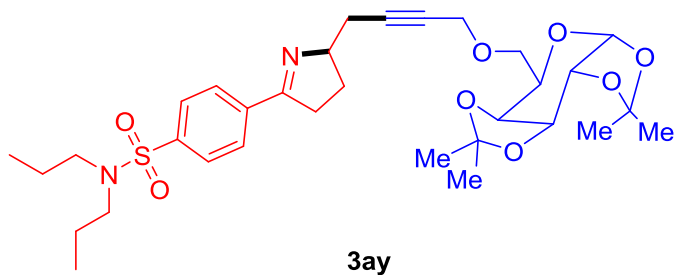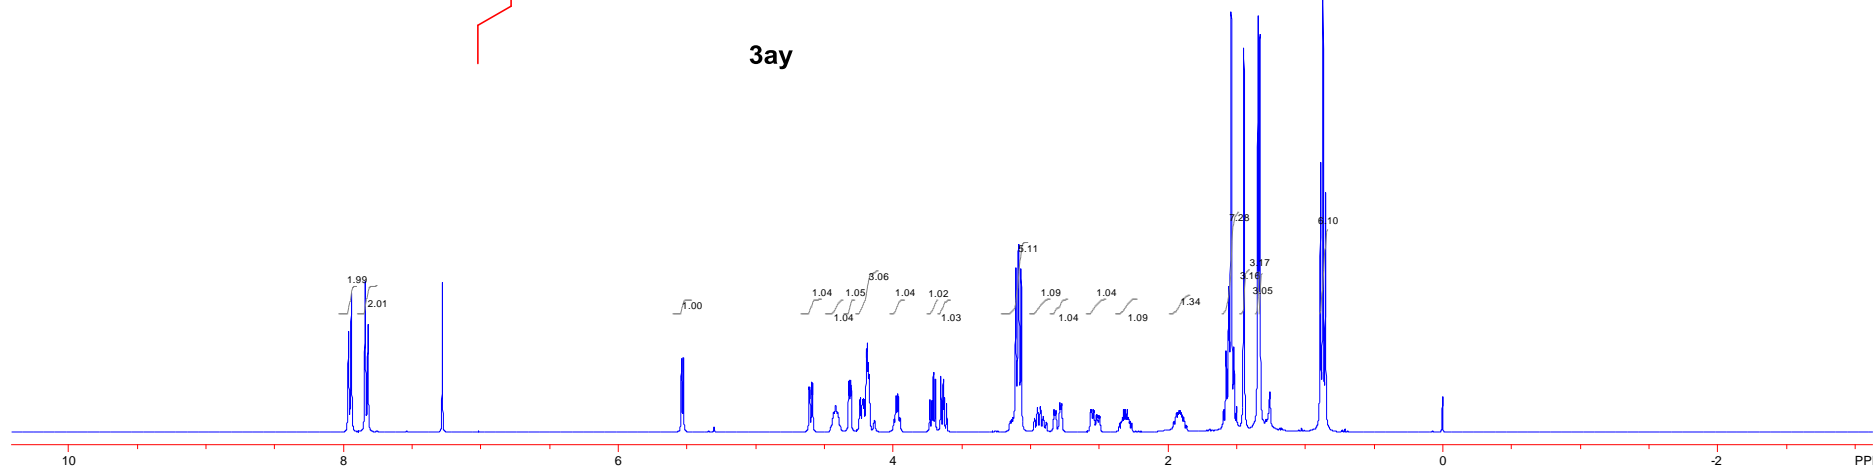

$^{13}\text{C}$  NMR (100 MHz,  $\text{CDCl}_3$ )

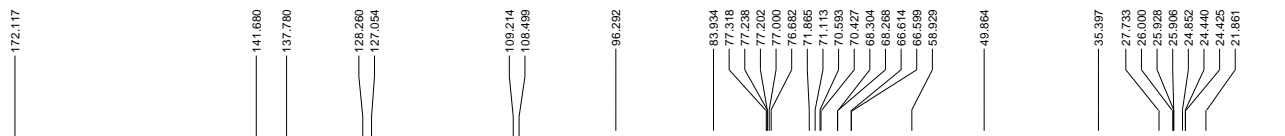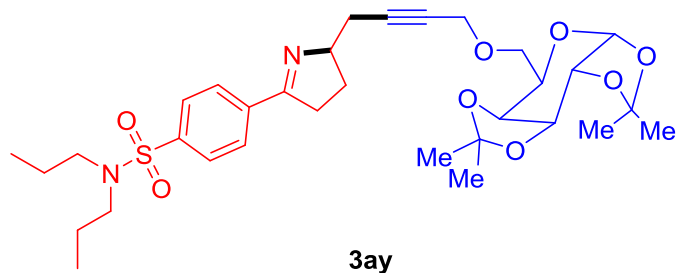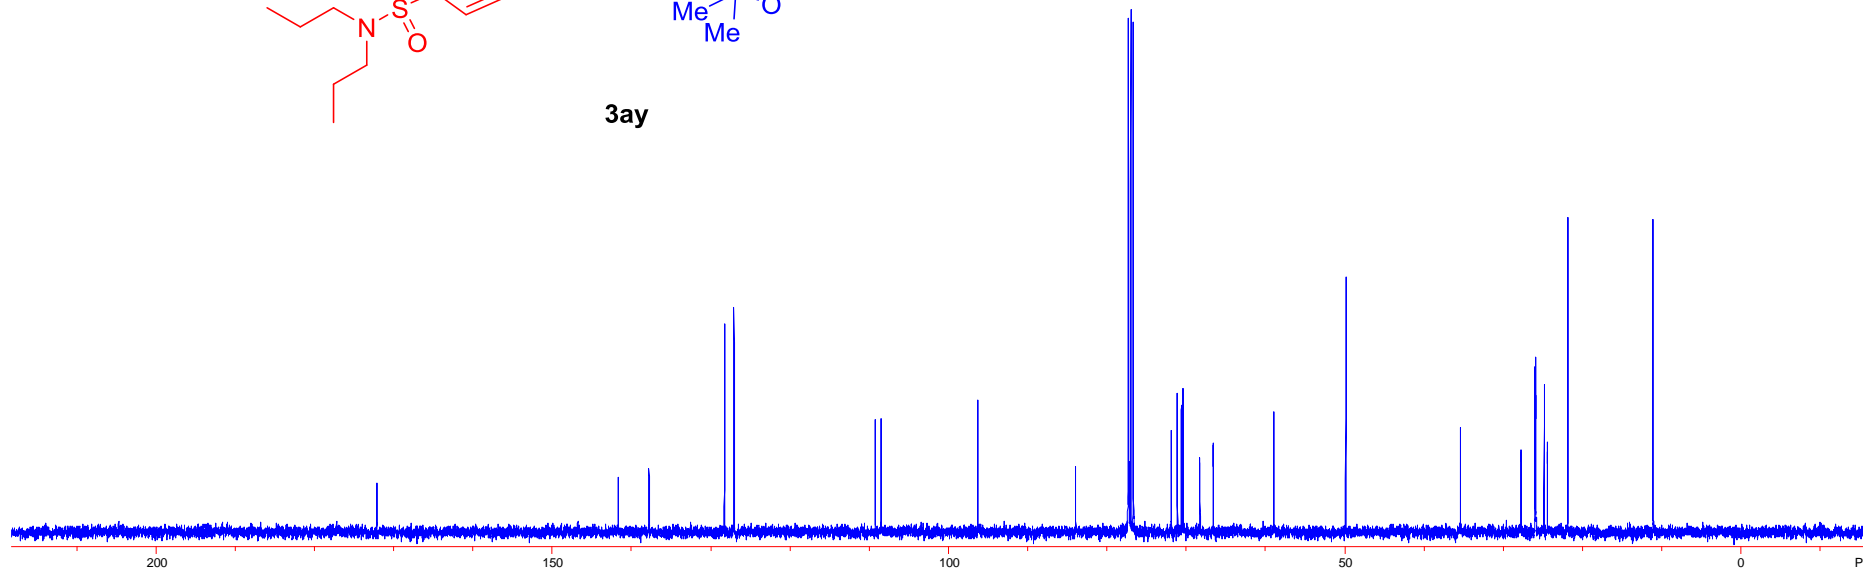



$^1\text{H}$  NMR(600 MHz,  $\text{CDCl}_3$ )

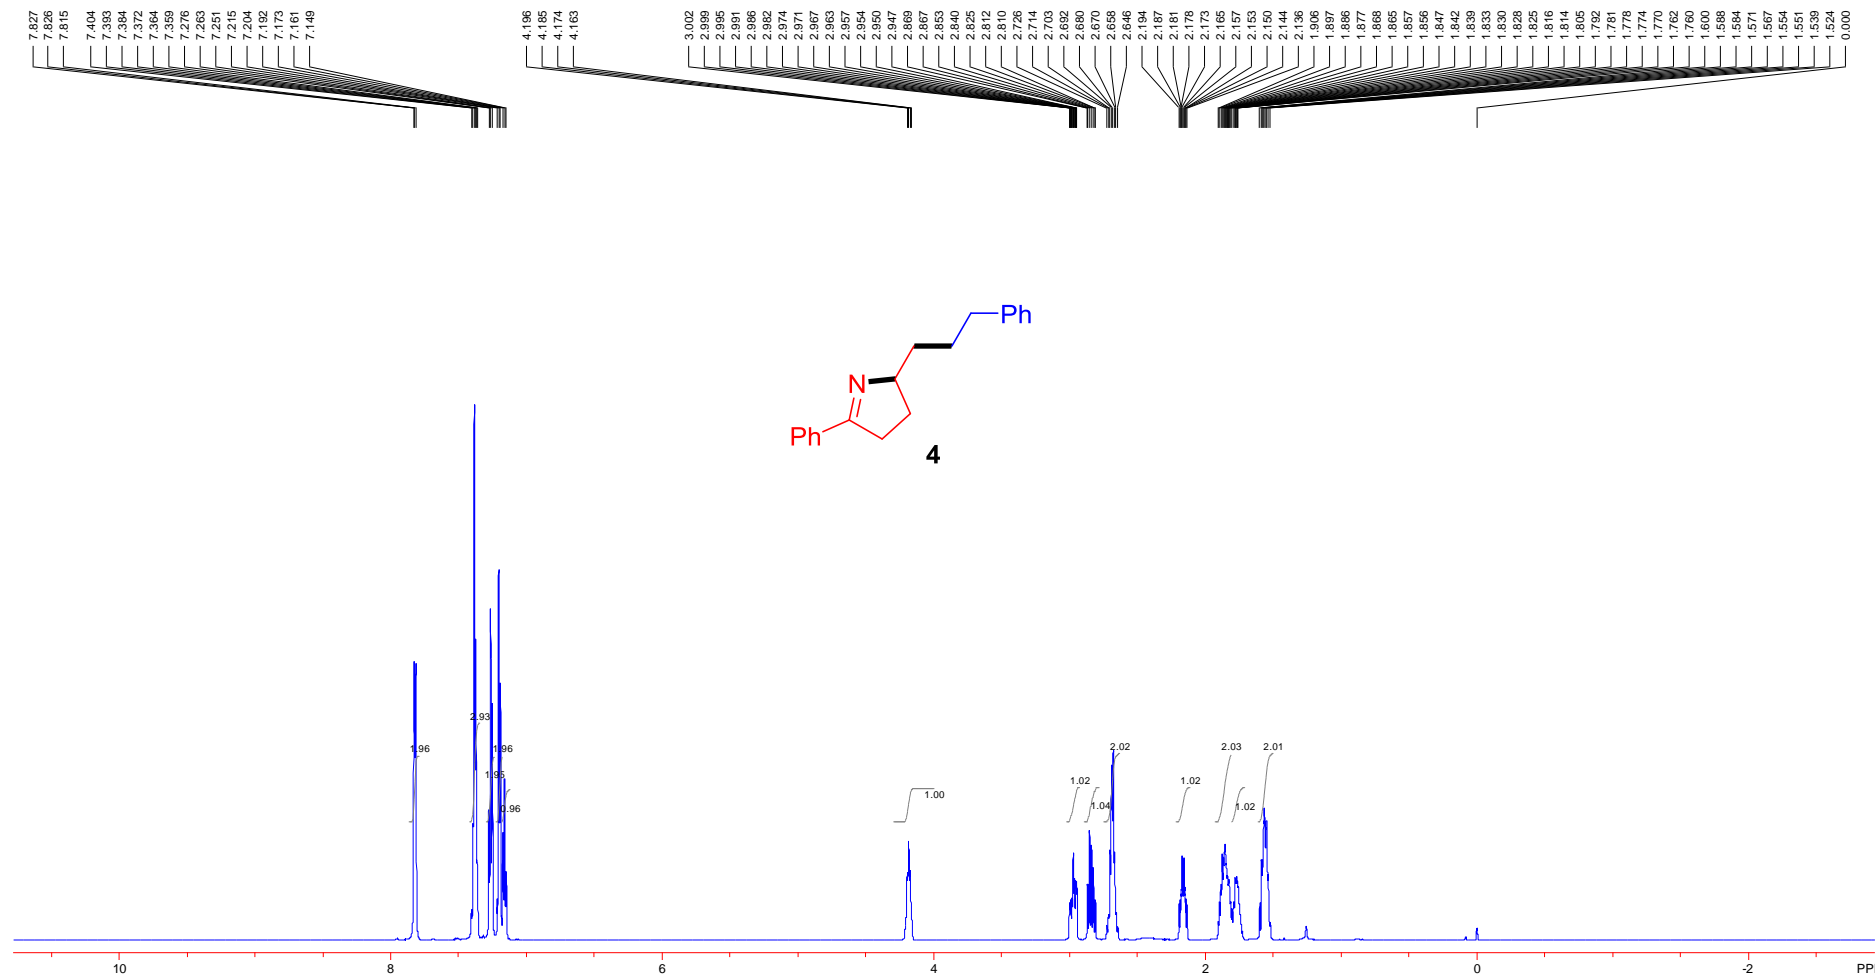

$^{13}\text{C}$  NMR (151 MHz,  $\text{CDCl}_3$ )

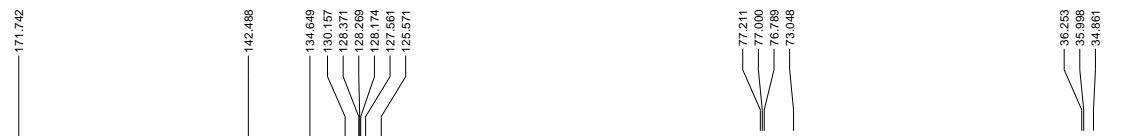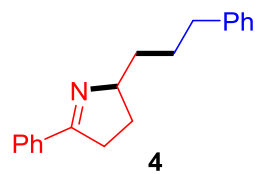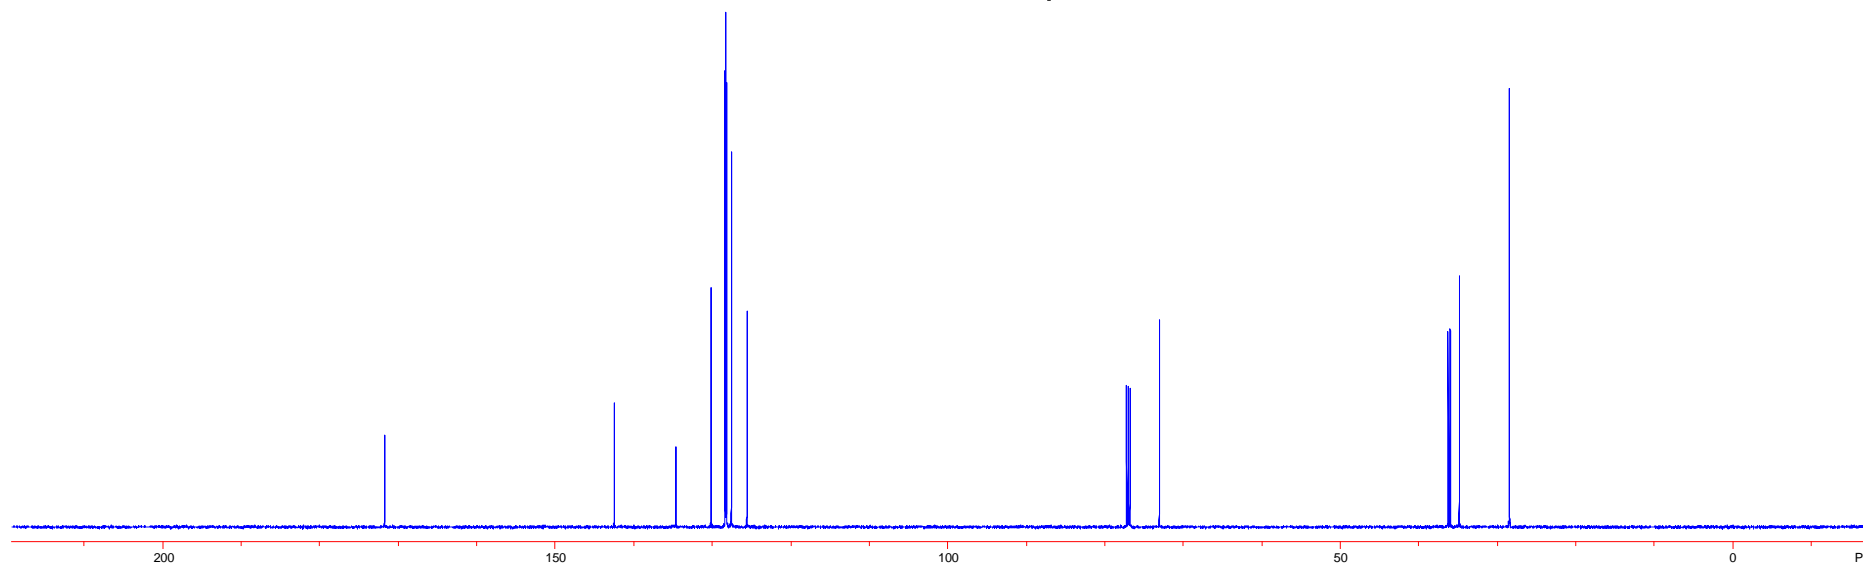

$^1\text{H}$  NMR(400 MHz,  $\text{CDCl}_3$ )

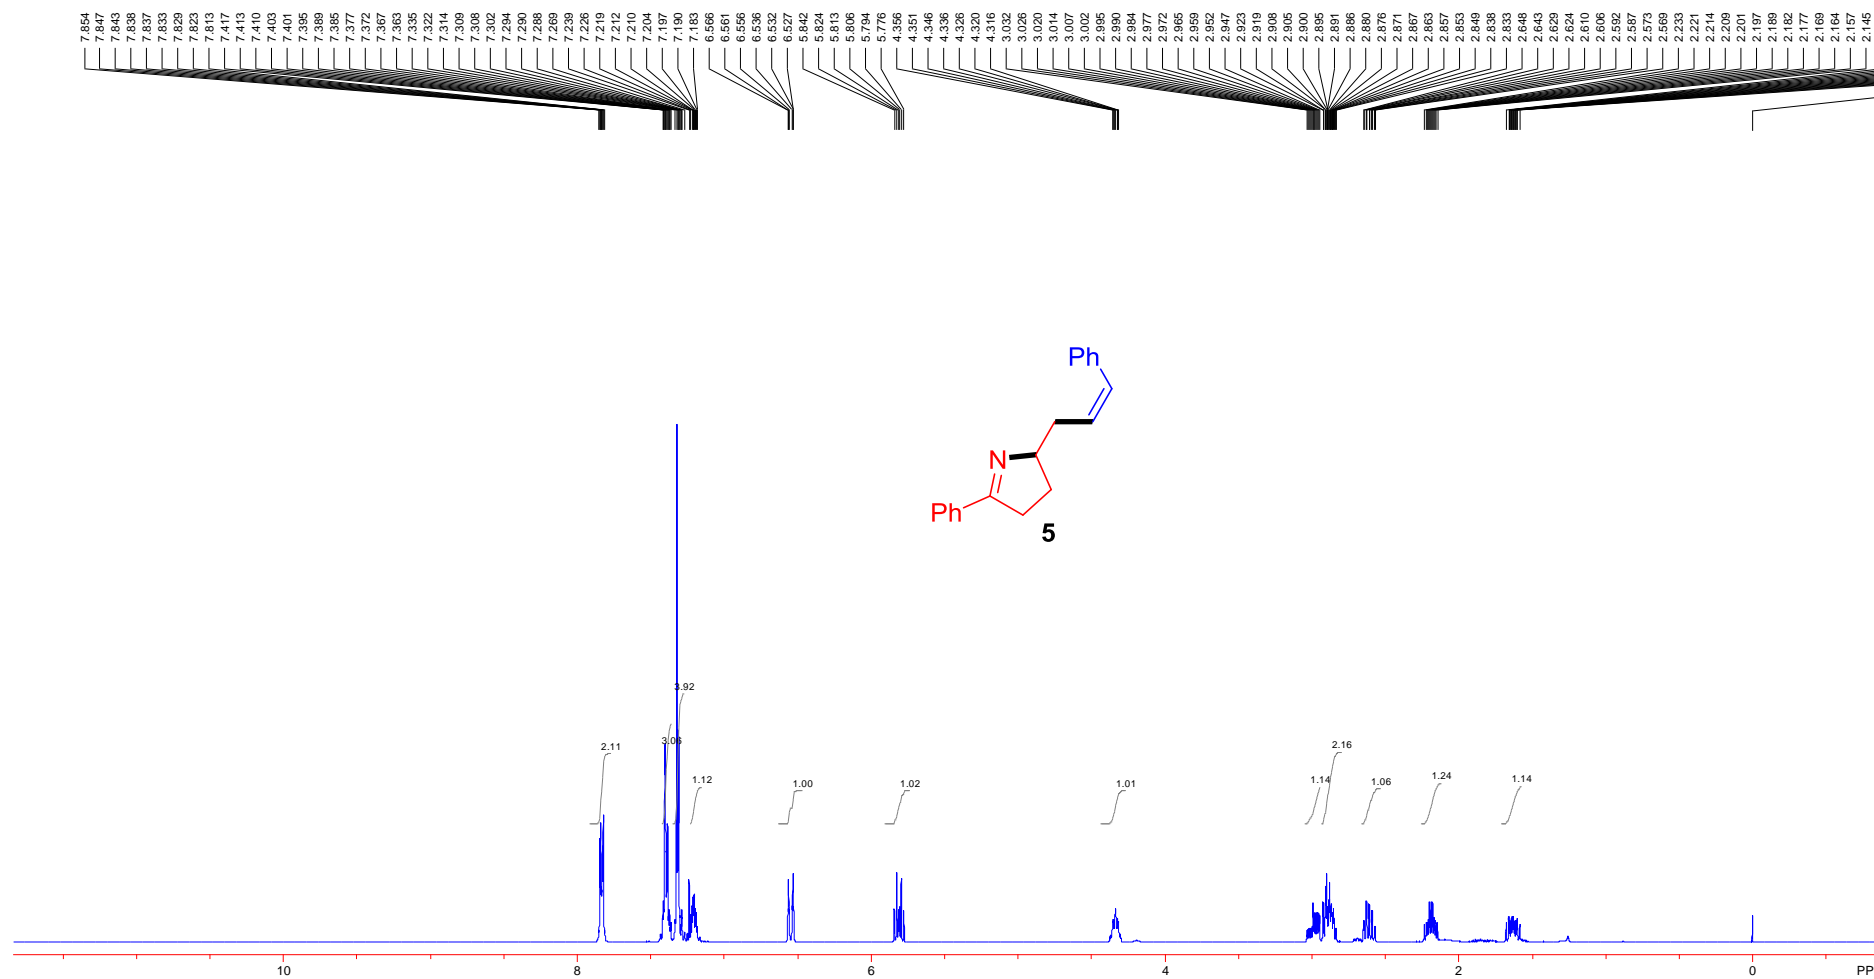

$^{13}\text{C}$  NMR (100 MHz,  $\text{CDCl}_3$ )

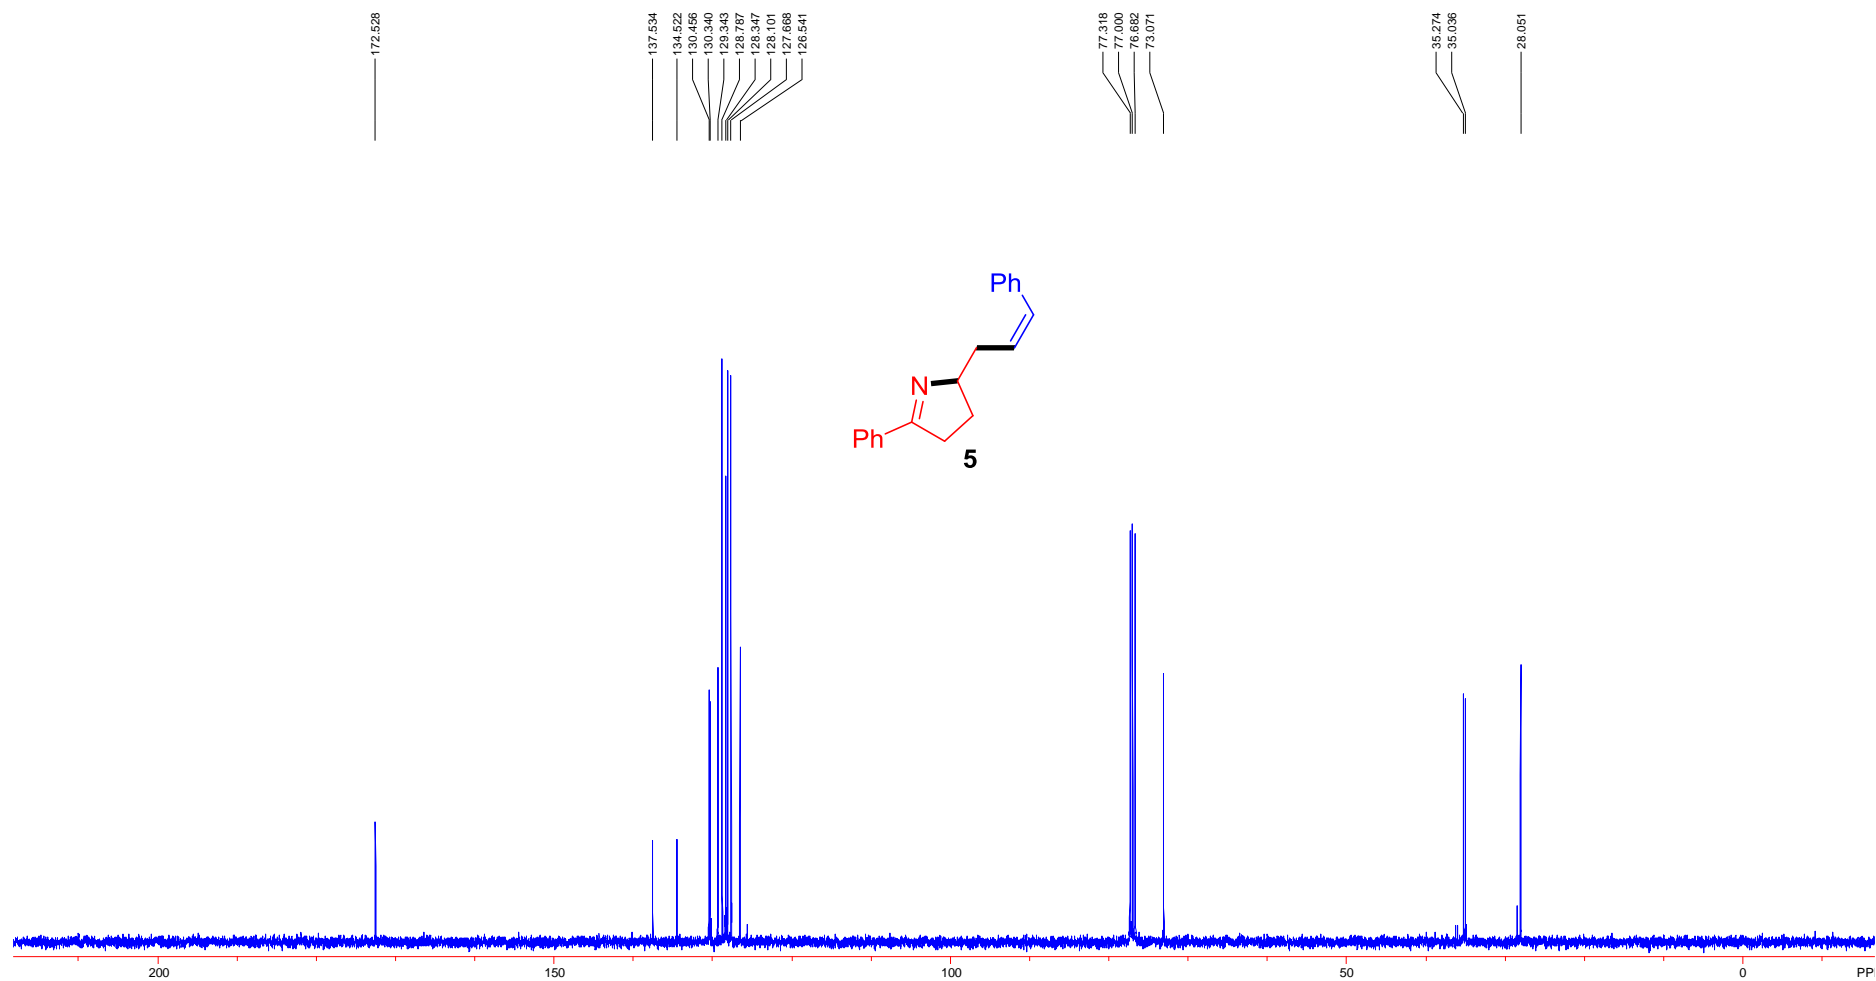

$^1\text{H}$  NMR(600 MHz,  $\text{CDCl}_3$ )

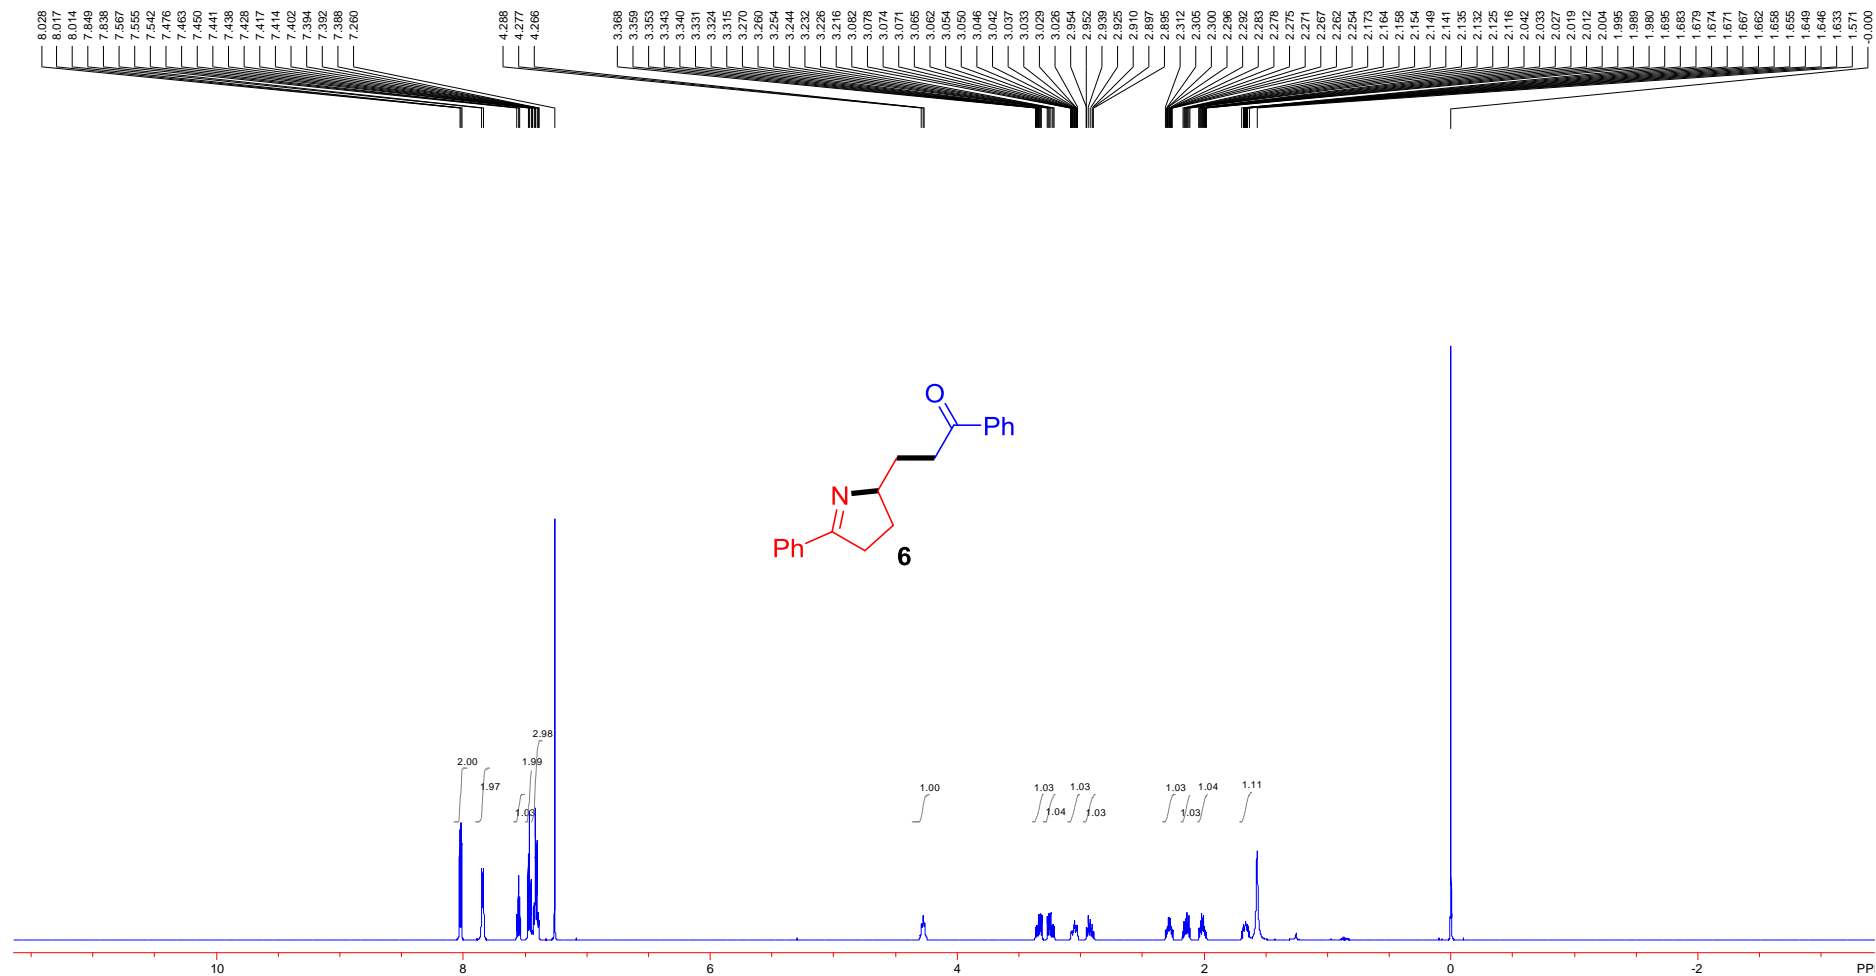

$^{13}\text{C}$  NMR (151 MHz,  $\text{CDCl}_3$ )

200.421

172.406

137.048  
134.634  
132.884  
130.361  
128.517  
128.385  
128.152  
127.649

77.211  
77.000  
76.789  
72.501

36.166  
35.036  
31.317  
28.881

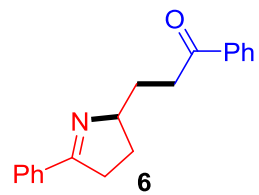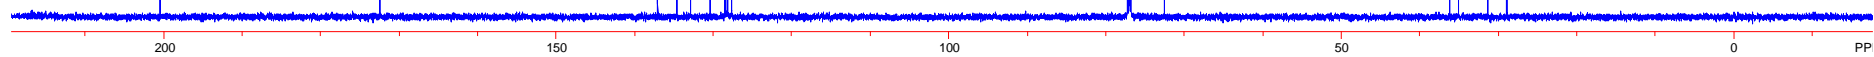

$^1\text{H}$  NMR(600 MHz,  $\text{CDCl}_3$ )

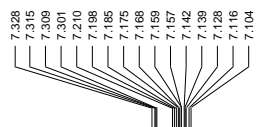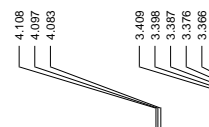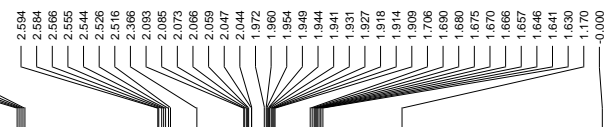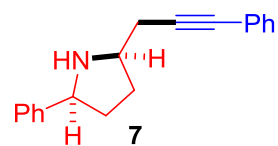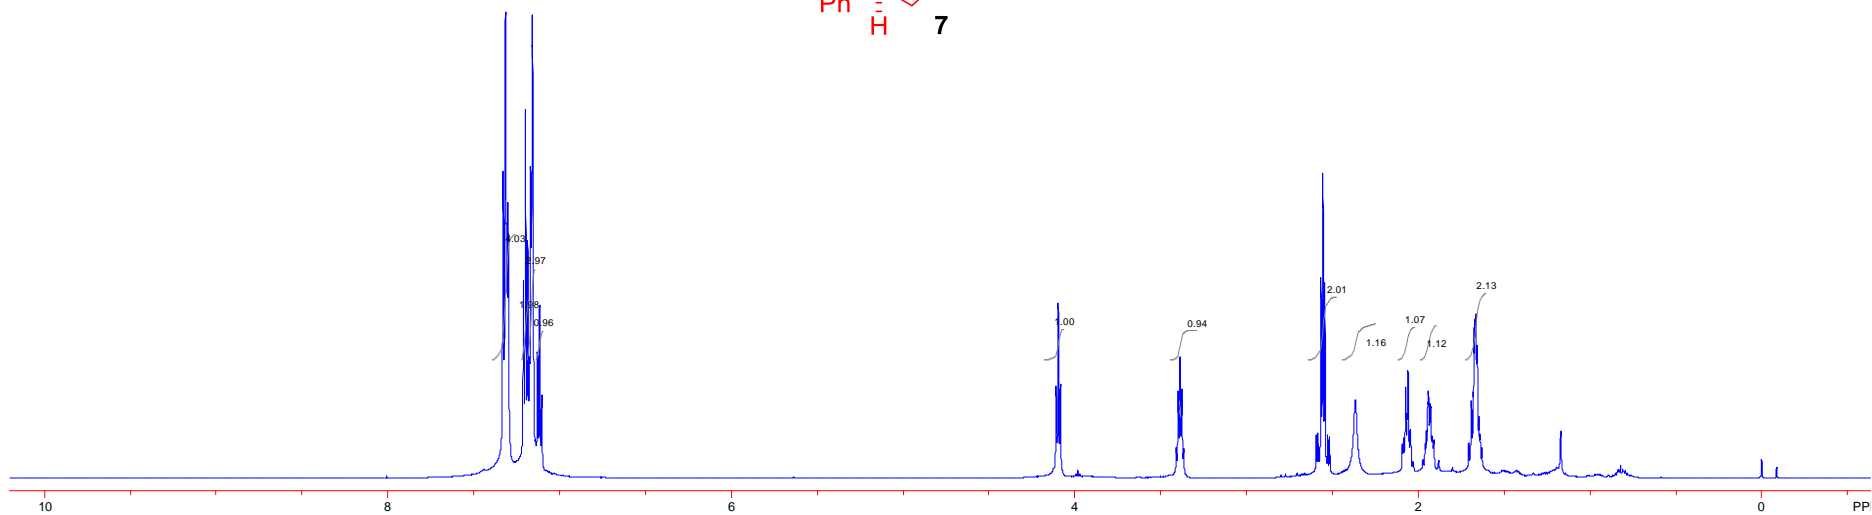

$^{13}\text{C}$  NMR (151 MHz,  $\text{CDCl}_3$ )

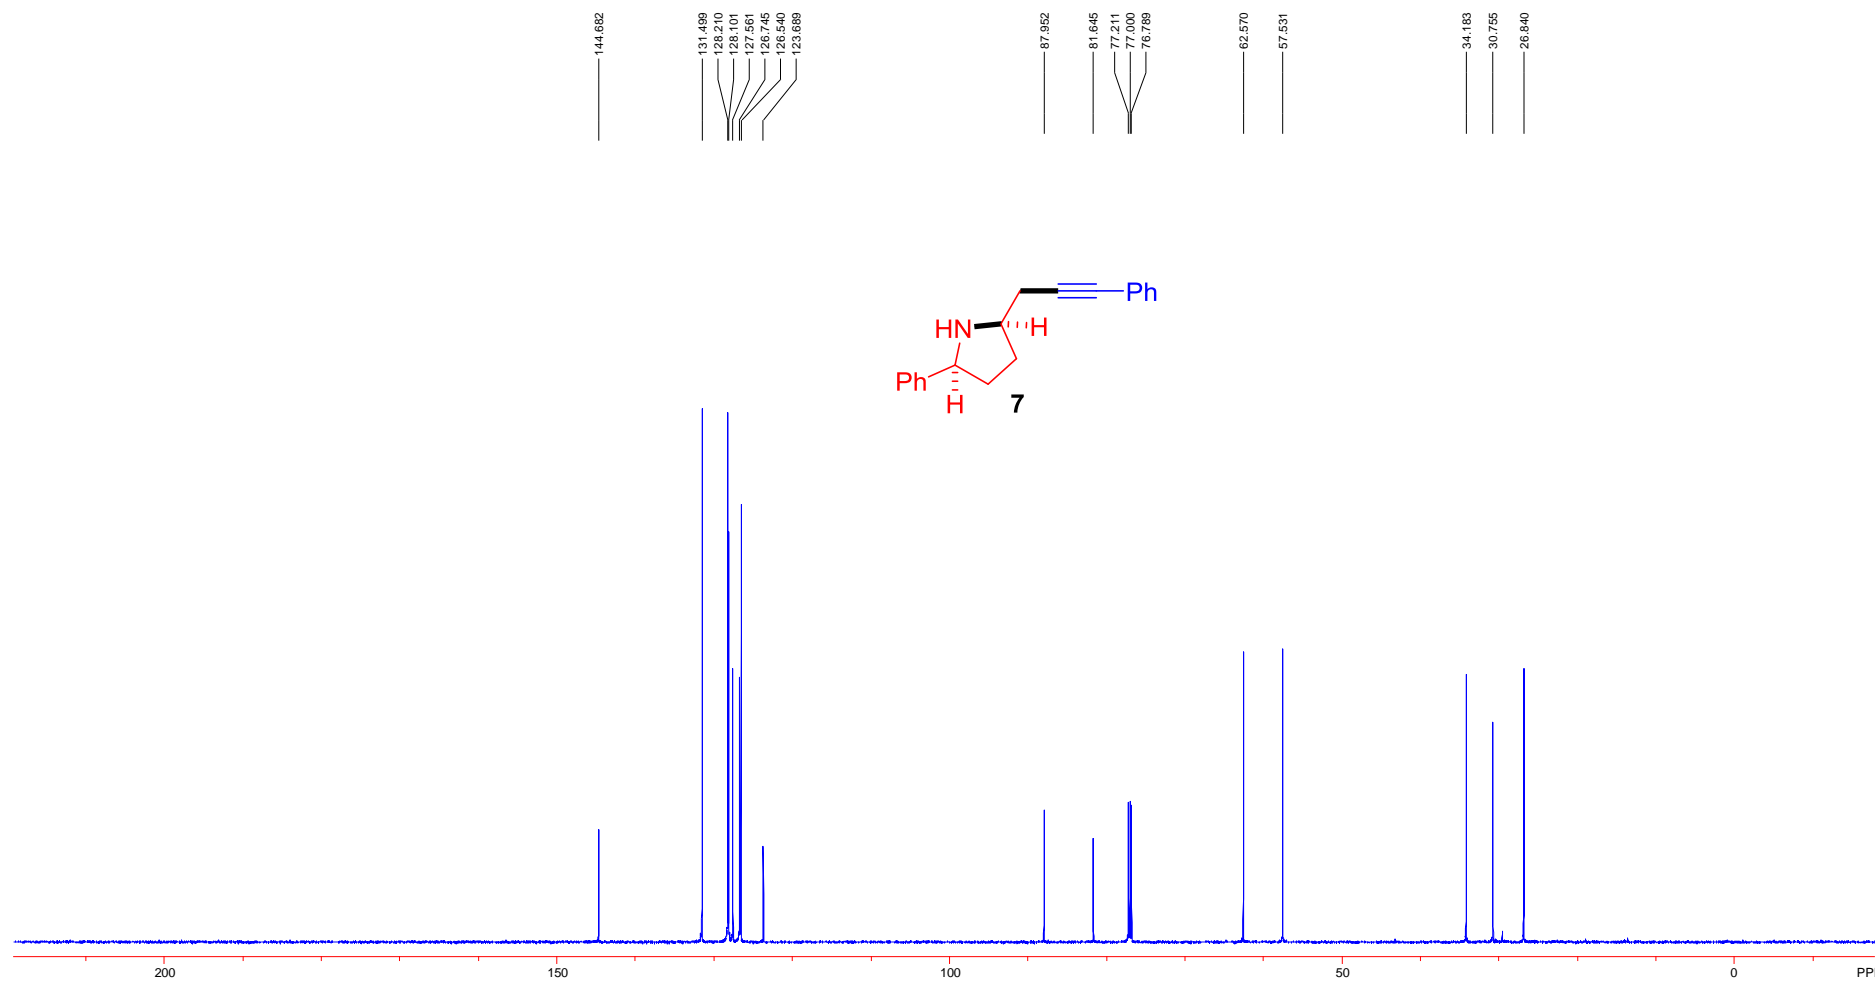



NOESY-1D  $^1\text{H}$  NMR (400 MHz,  $\text{CDCl}_3$ )

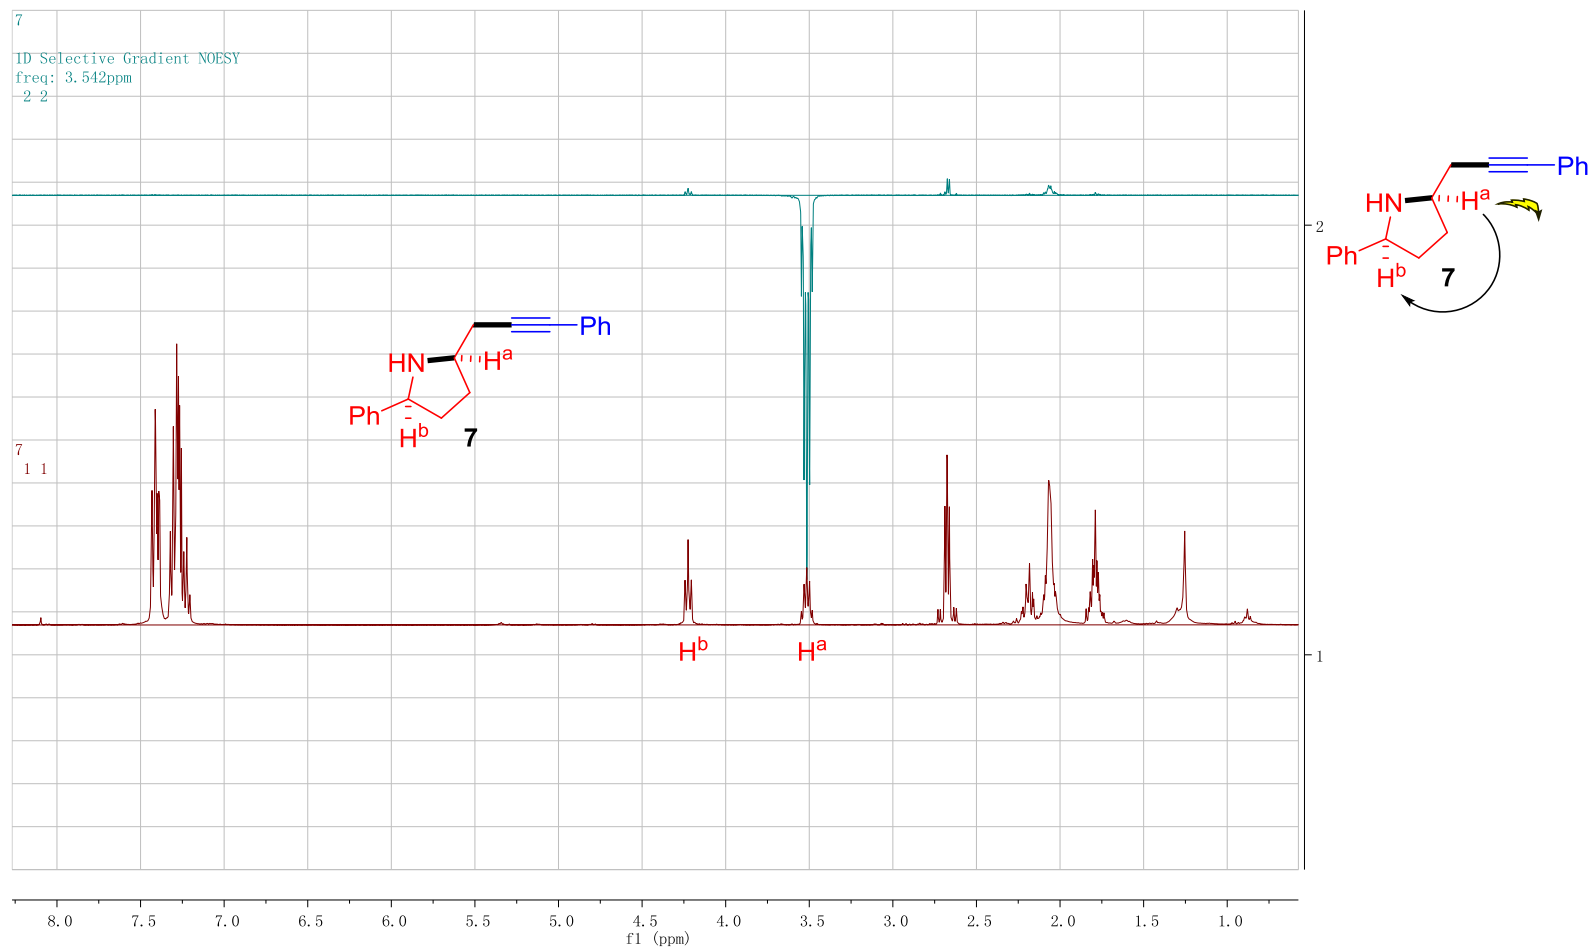

$^1\text{H}$  NMR(600 MHz,  $\text{CDCl}_3$ )

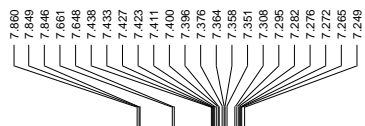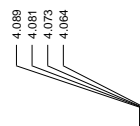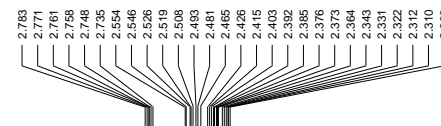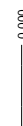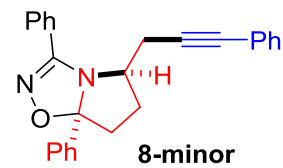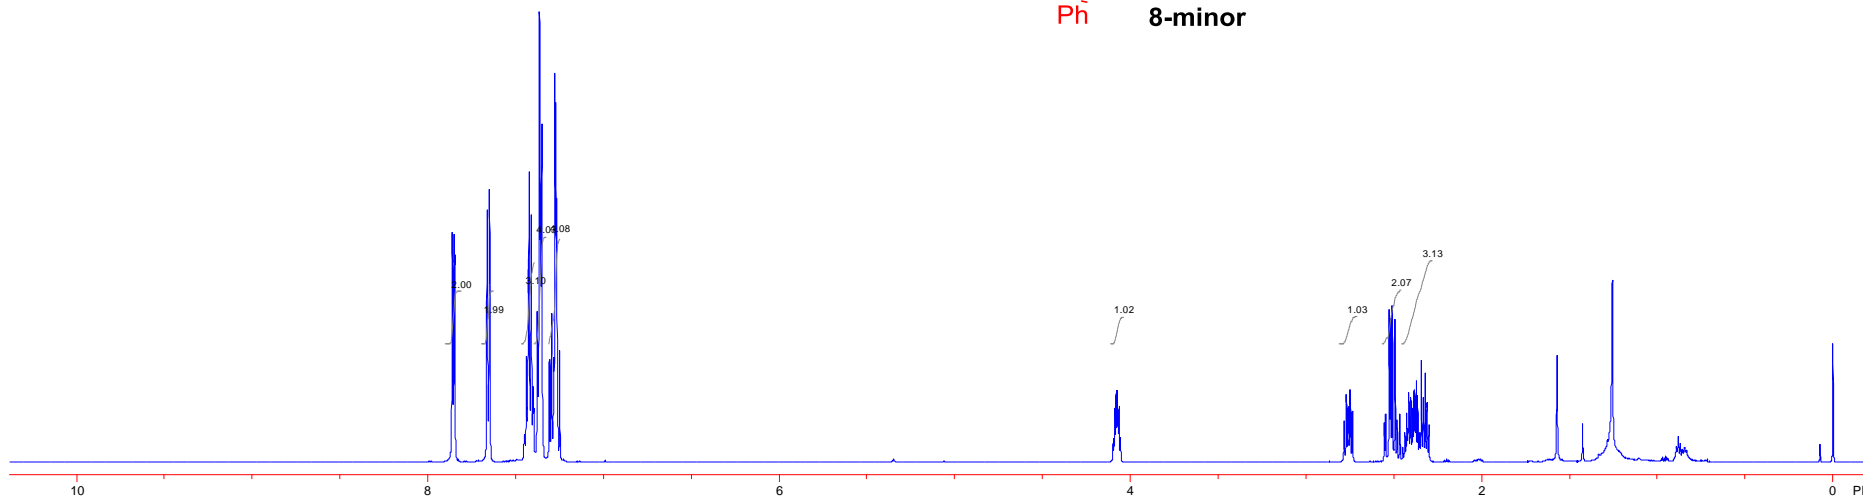

$^{13}\text{C}$  NMR (151 MHz,  $\text{CDCl}_3$ )

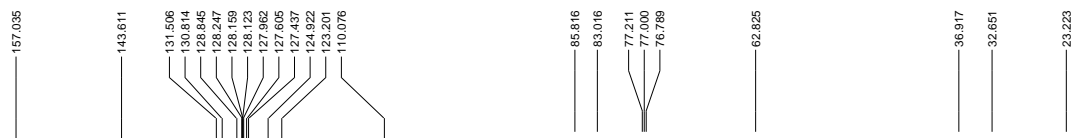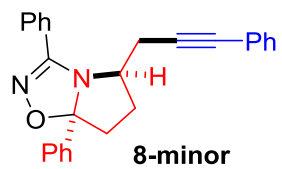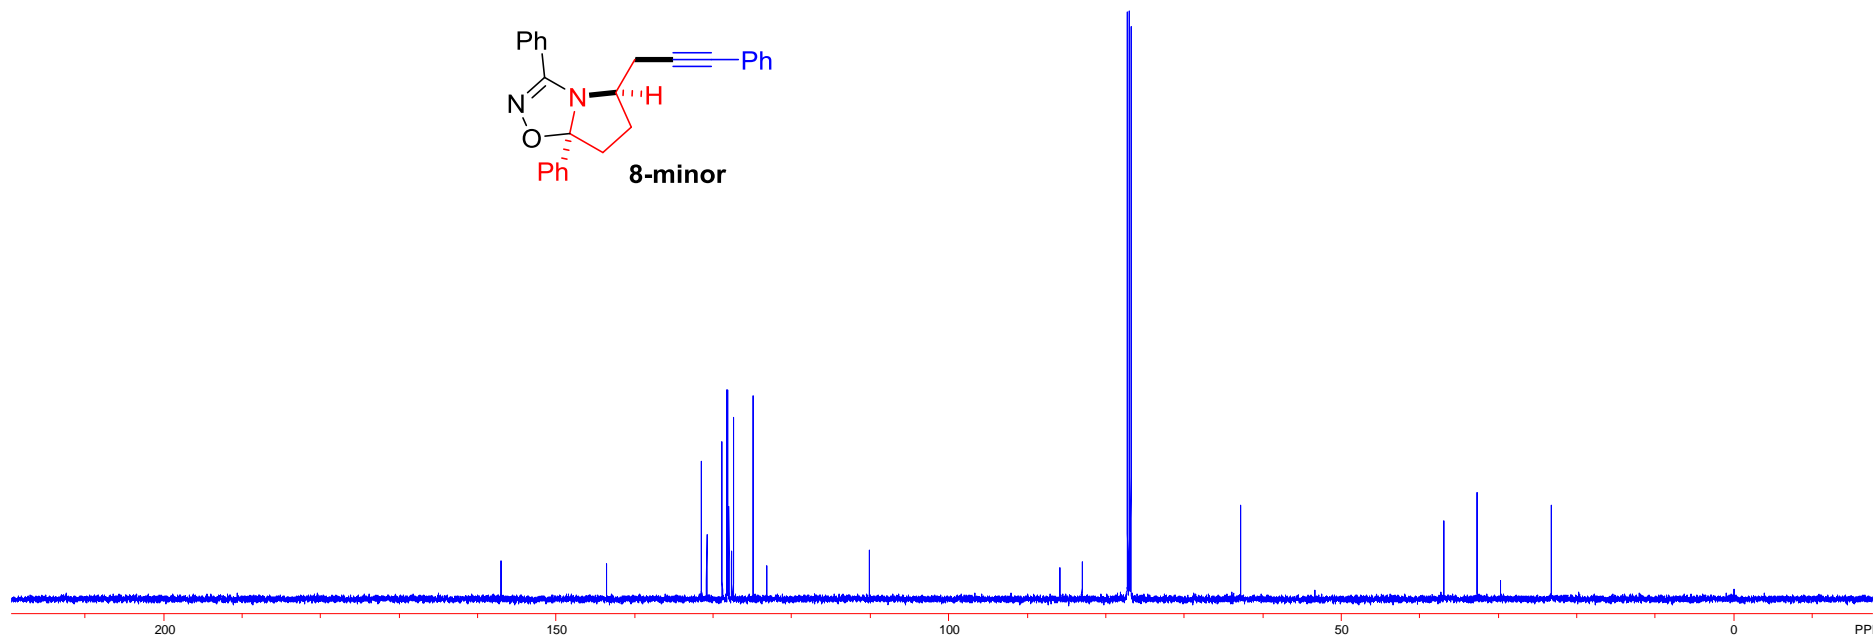

NOESY-1D <sup>1</sup>H NMR (400 MHz, CDCl<sub>3</sub>)

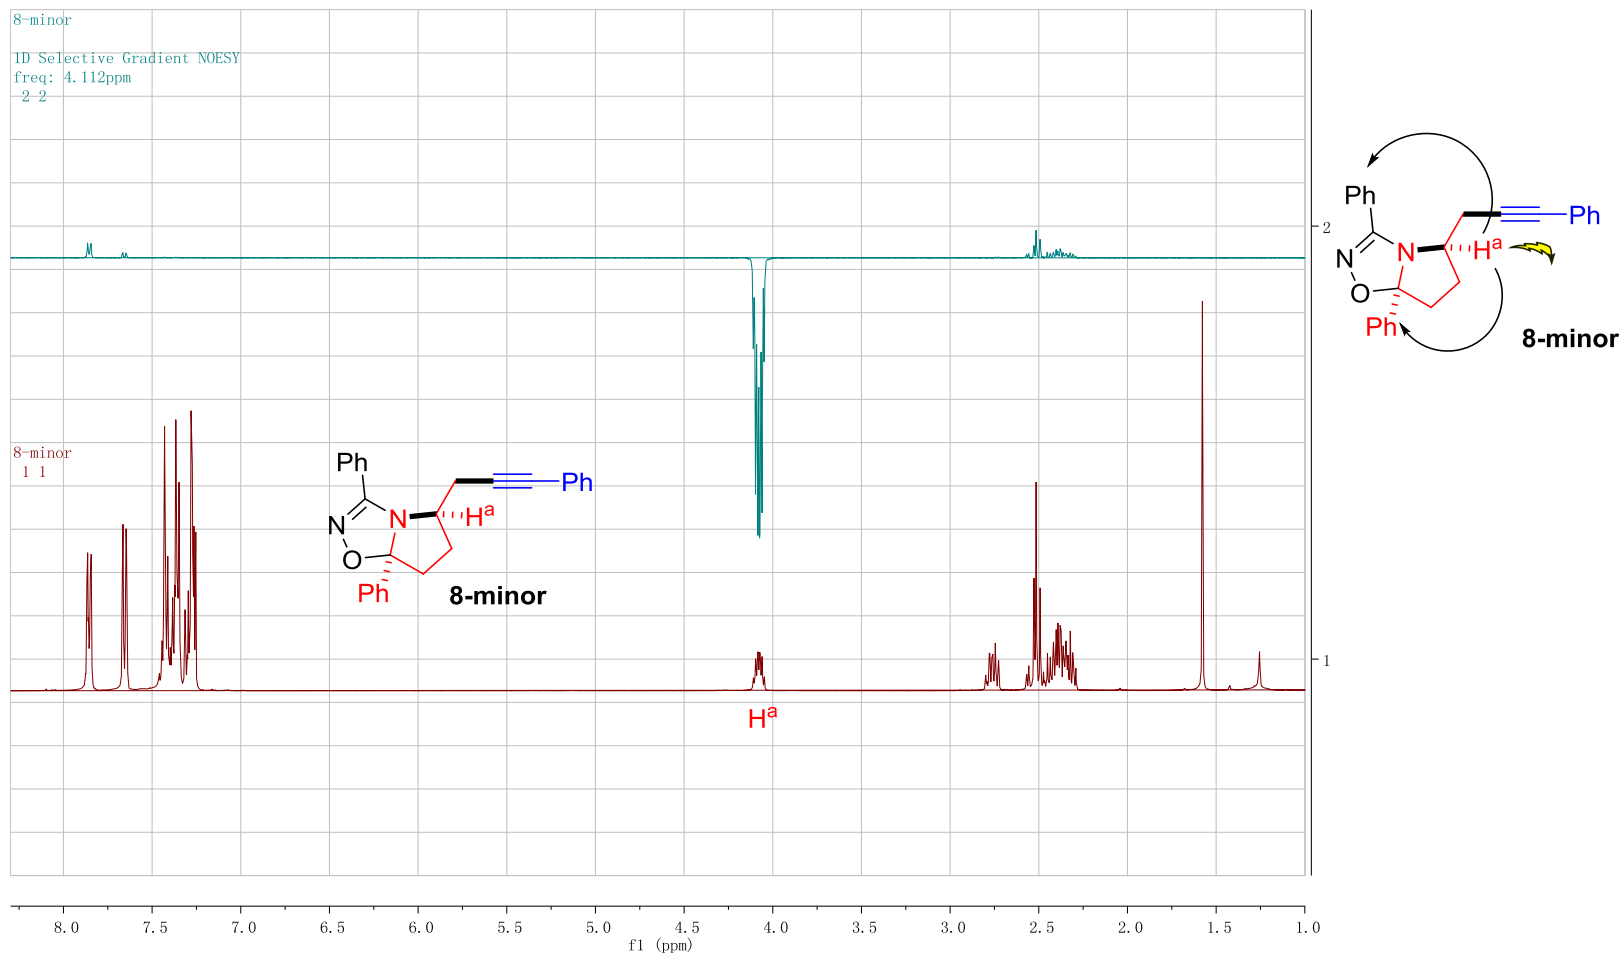

$^1\text{H}$  NMR(600 MHz,  $\text{CDCl}_3$ )

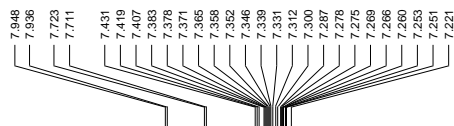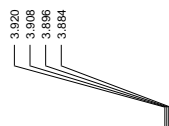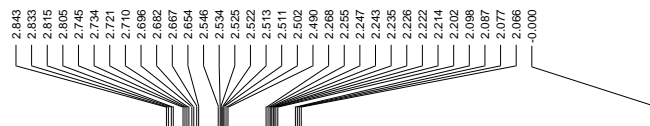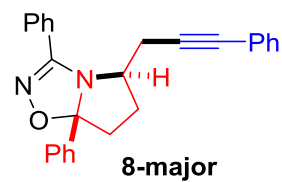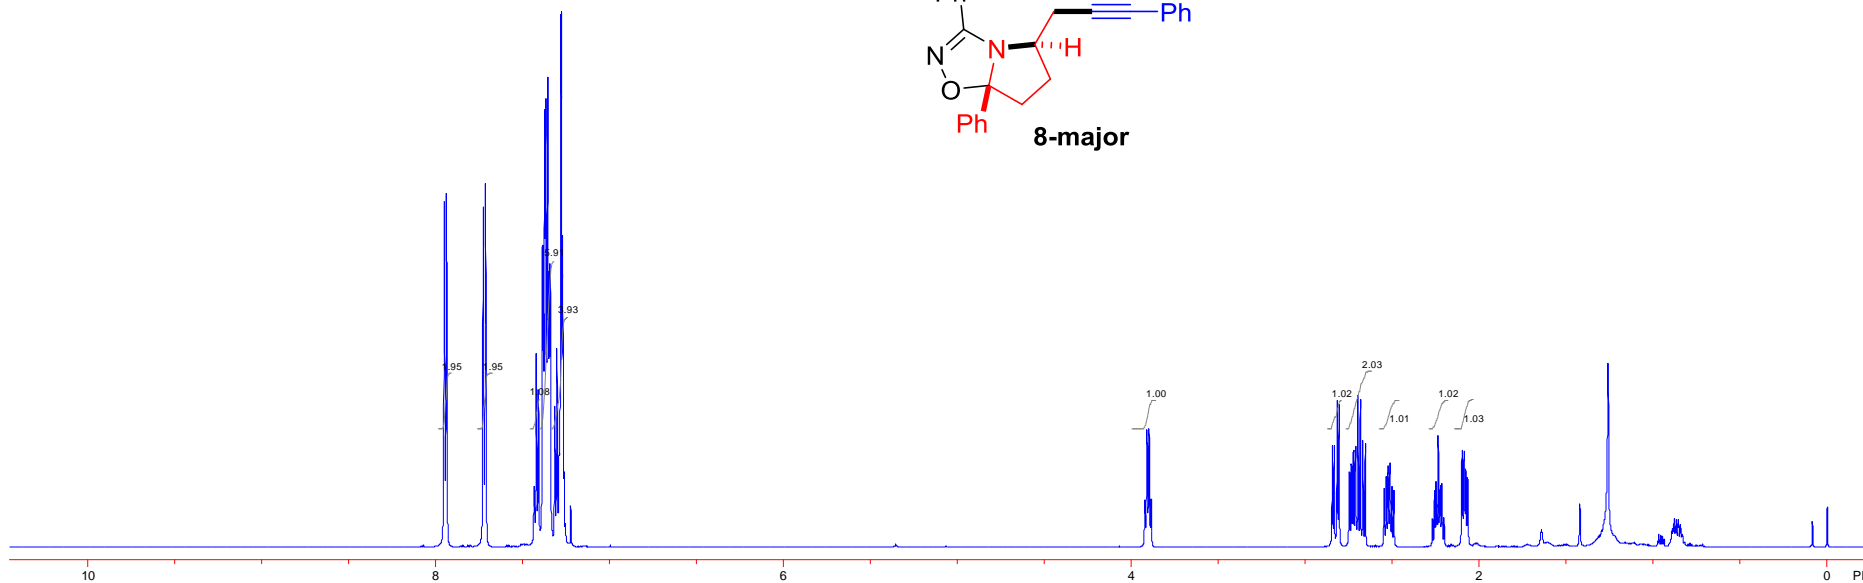

$^{13}\text{C}$  NMR (151 MHz,  $\text{CDCl}_3$ )

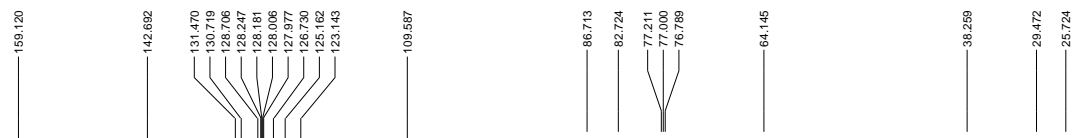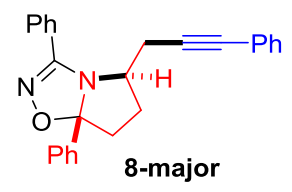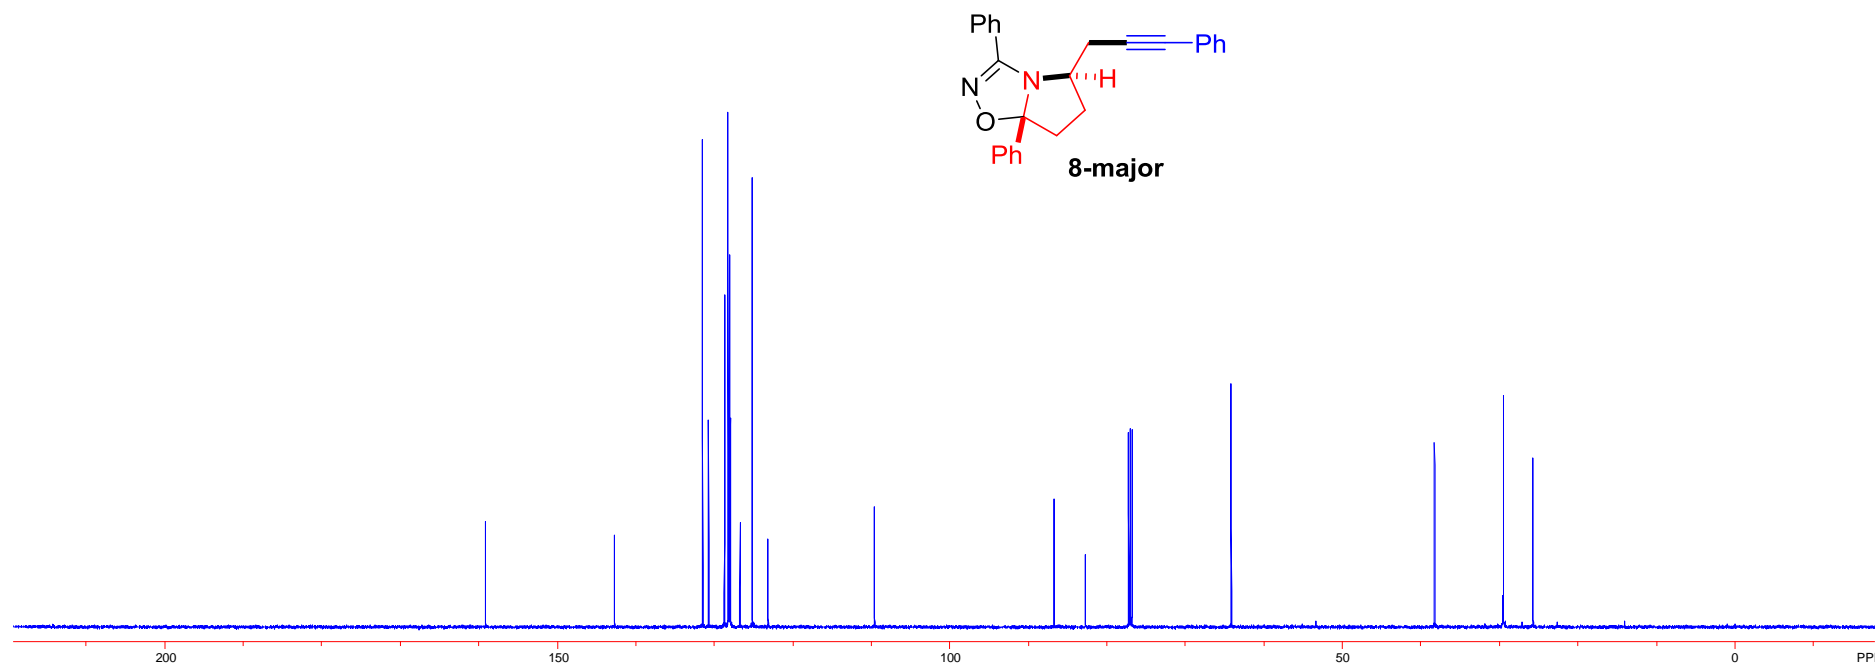

NOESY-1D <sup>1</sup>H NMR (400 MHz, CDCl<sub>3</sub>)

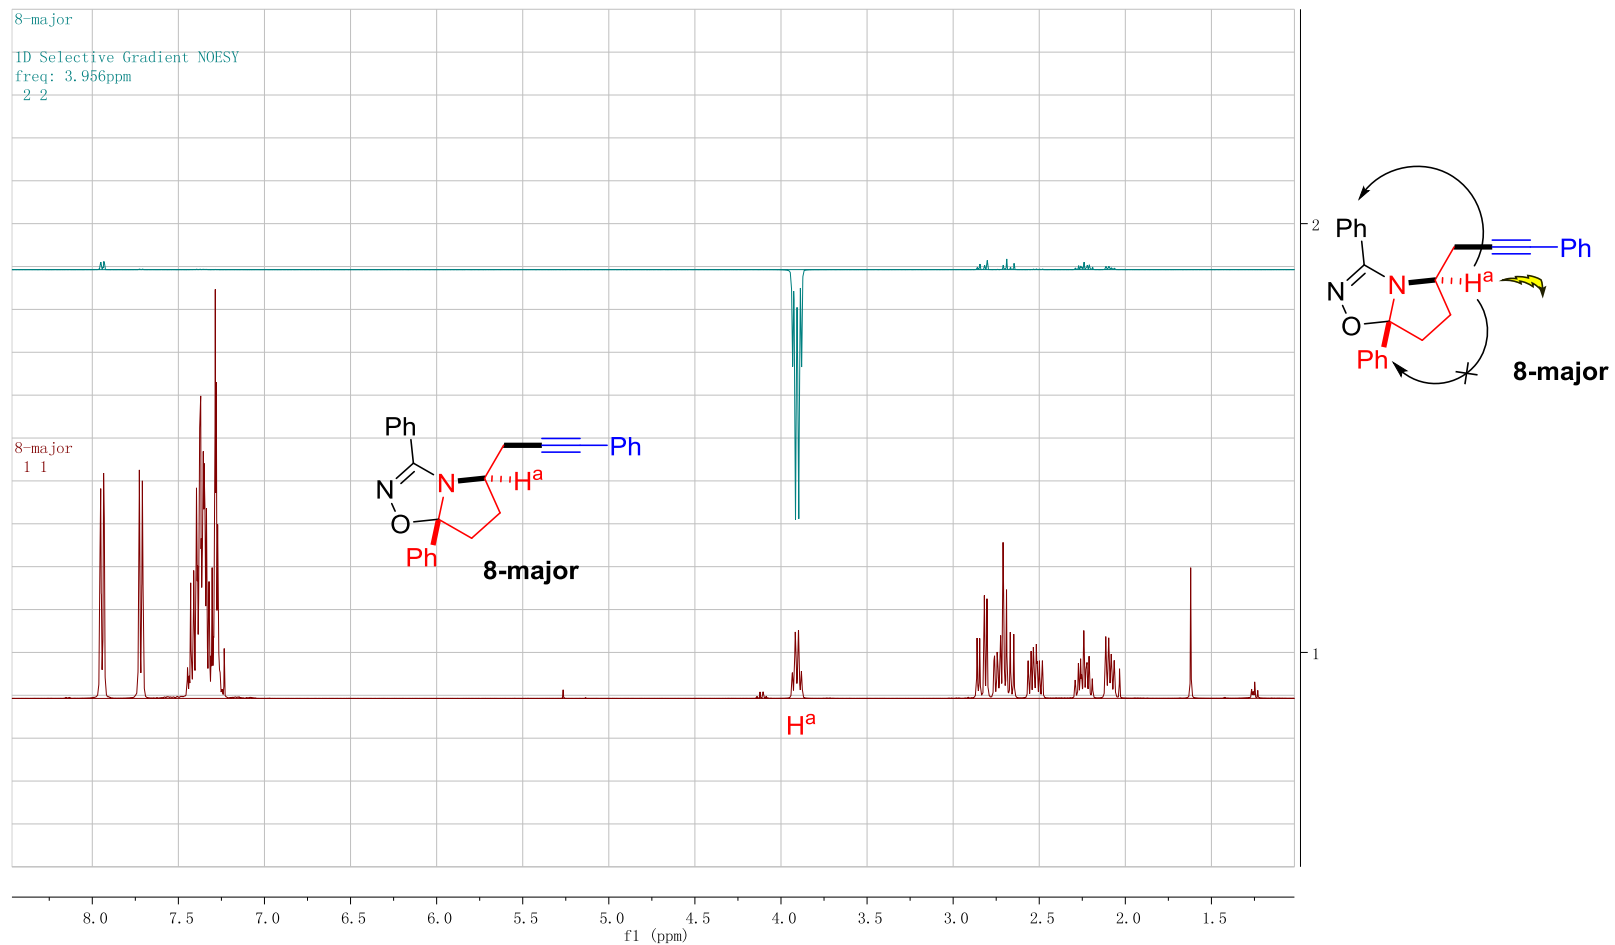

$^1\text{H}$  NMR(400 MHz,  $\text{CDCl}_3$ )

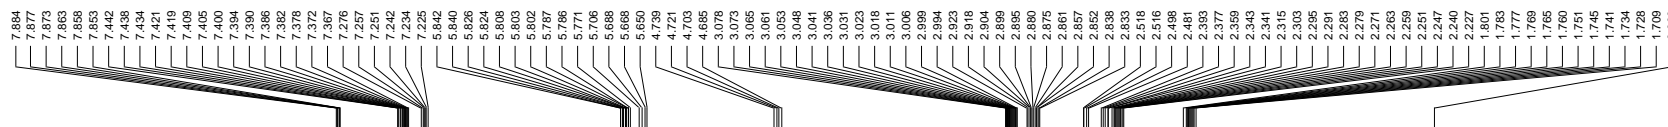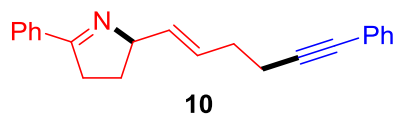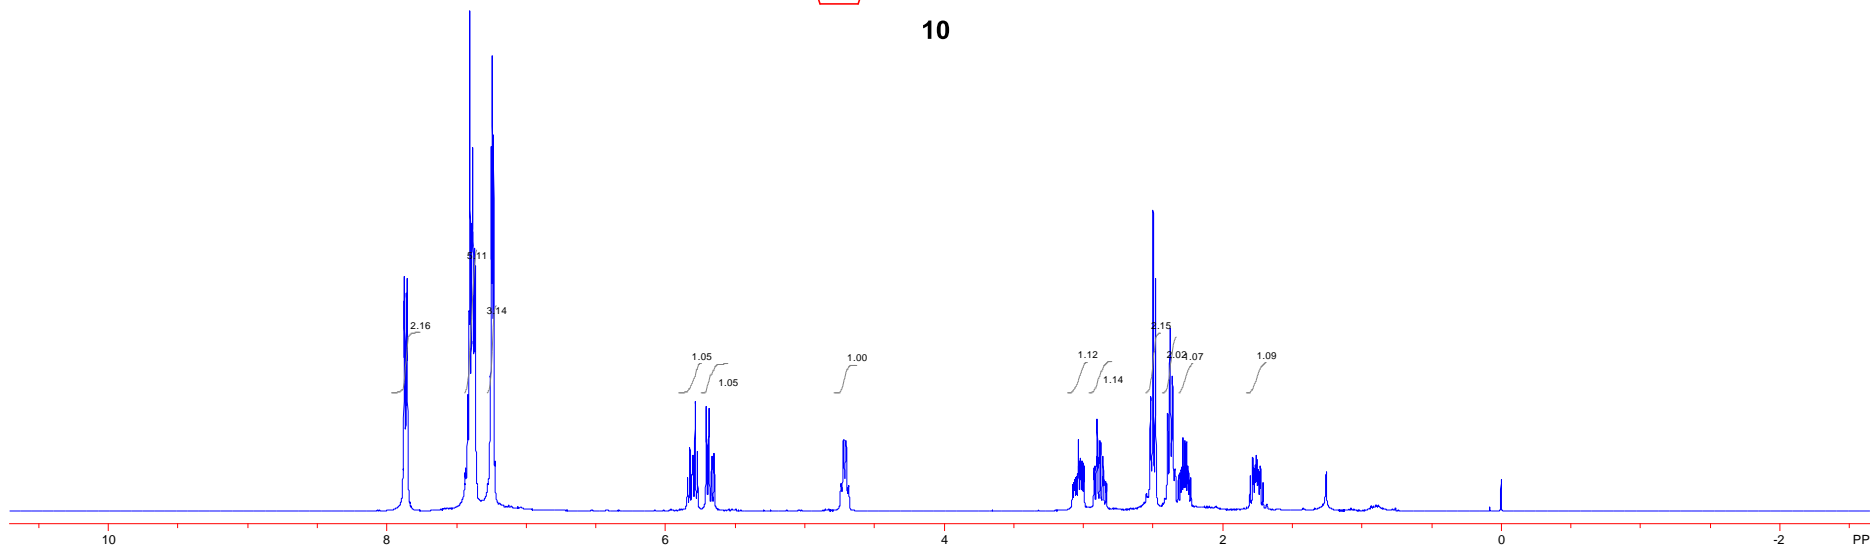



$^{13}\text{C}$  NMR (100 MHz,  $\text{CDCl}_3$ )

172.988

134.389  
133.294  
131.474  
130.405  
129.047  
128.311  
128.094  
127.718  
127.444  
123.883

89.647

80.980  
77.318  
77.000  
76.682  
74.241

34.985  
31.641  
29.626

19.471

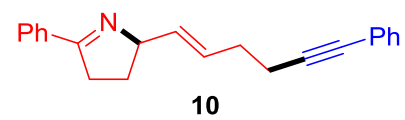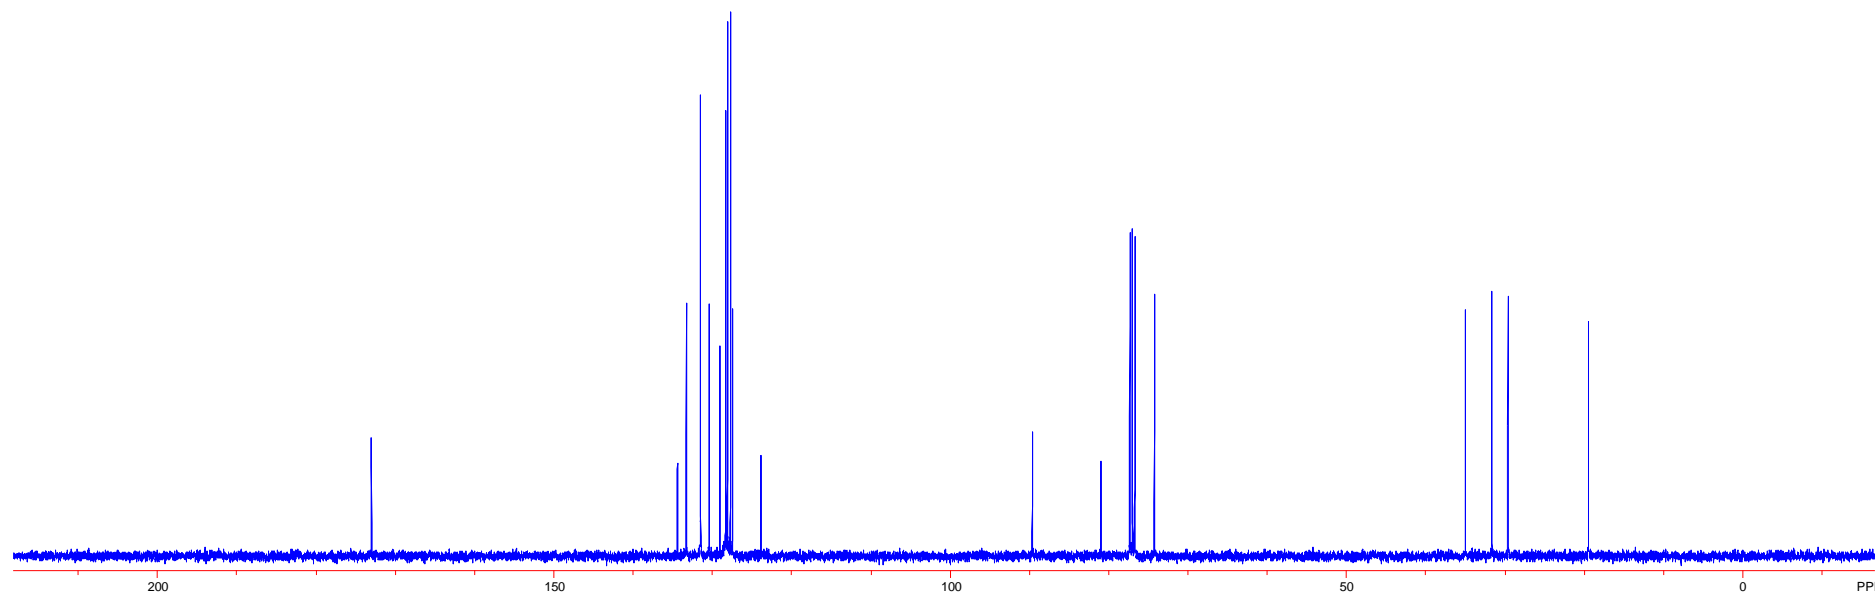

Supplement: d1qo01217g1.pdf [file d1qo01217g1.pdf]
